# Supplementary material for: Combined transcriptomic and proteomic analysis reveals multiple pathways involved in self-pollen tube development and the potential roles of FviYABBY1 in self-incompatibility in Fragaria viridis
Source: Front Plant Sci. 2022 Sep 14;13:927001. doi: 10.3389/fpls.2022.927001 (PMC9515988; doi:10.3389/fpls.2022.927001)
Supplement: Supplementary file 2 [file Table_2.XLSX]

## Sheet: Table S2
Supplementary Table S2. Summary for de novo transcriptome.
Total nucleotide length (Gb)	40.23
Total clean reads (Mb)	268.16
Clean reads Q30 (%)	> 87.14
Total number of unigenes	71756
Mean length of unigenes (bp)	1209
GC percentage (%)	42.43
N50 length (bp)	1941
