# Supplementary material for: Combined transcriptomic and proteomic analysis reveals multiple pathways involved in self-pollen tube development and the potential roles of FviYABBY1 in self-incompatibility in Fragaria viridis
Source: Front Plant Sci. 2022 Sep 14;13:927001. doi: 10.3389/fpls.2022.927001 (PMC9515988; doi:10.3389/fpls.2022.927001)
Supplement: Supplementary file 3 [file Table_3.XLSX]

## Sheet: Table S3
Supplementary Table S3. DEGs between pistils harvested at 0 and 24 HAP. The significance level was set at p-value ≤ 0.05 and |log2 FC| ≥ 1. FC: Fold change (24 HAP / 0 HAP).
Gene accession	Length	log2 FC	p-value	Up/Down-regulation	Annotation
					NCBI Nr	NBCI Nt	Swissprot	KEGG	COG	Interpro	GO
Unigene3711_All	1207	1.56706	7.41e-11	Up	gi|470107906|ref|XP_004290279.1|/0/PREDICTED: probable fructokinase-5 [Fragaria vesca subsp. vesca]	gi|464895682|gb|KC339524.1|/0.0/Prunus persica cultivar Chunxue fructokinase (FRK) mRNA, complete cds	sp|Q0J8G4|SCRK2_ORYSJ/8e-144/Fructokinase-2 OS=Oryza sativa subsp. japonica GN=FRK2 PE=1 SV=1	fve:101291585/0.0/probable fructokinase-5; K00847 fructokinase [EC:2.7.1.4]	BH1857/4e-58/---	PTHR10584/2.2E-221/--	biological_process:GO:0016310//phosphorylation;molecular_function:GO:0016301//kinase activity;GO:0016773//phosphotransferase activity, alcohol group as acceptor;
CL1431.Contig2_All	2696	1.53052	2.61e-10	Up	gi|764623960|ref|XP_004308288.2|/0/PREDICTED: probable serine/threonine-protein kinase WNK4 isoform X1 [Fragaria vesca subsp. vesca]	gi|470145317|ref|XM_004308240.1|/0.0/PREDICTED: Fragaria vesca subsp. vesca probable serine/threonine-protein kinase WNK4-like (LOC101312872), mRNA	sp|Q6EU49|WNK4_ORYSJ/2e-174/Probable serine/threonine-protein kinase WNK4 OS=Oryza sativa subsp. japonica GN=WNK4 PE=2 SV=1	fve:101312872/0.0/probable serine/threonine-protein kinase WNK4; K08867 WNK lysine deficient protein kinase [EC:2.7.11.1]	YAR019c/2e-21/---	PF00069/1.2E-53/Protein kinase domain	biological_process:GO:0006468//protein phosphorylation;molecular_function:GO:0005524//ATP binding;GO:0004672//protein kinase activity;
Unigene4489_All	532	2.19697	0.000166483	Up	gi|764619422|ref|XP_011468341.1|/3.12851e-53/PREDICTED: 7-deoxyloganetin glucosyltransferase-like [Fragaria vesca subsp. vesca]	gi|470141365|ref|XM_004306356.1|/1e-152/PREDICTED: Fragaria vesca subsp. vesca UDP-glycosyltransferase 85A2-like (LOC101313544), mRNA	sp|Q9LMF0|U85A5_ARATH/1e-33/UDP-glycosyltransferase 85A5 OS=Arabidopsis thaliana GN=UGT85A5 PE=2 SV=1	zma:100284975/2e-24/cytokinin-O-glucosyltransferase 2; K13030 cyanohydrin beta-glucosyltransferase [EC:2.4.1.85]	NA	NA	biological_process:GO:0008152//metabolic process;molecular_function:GO:0016758//transferase activity, transferring hexosyl groups;
CL7239.Contig4_All	1735	1.47691	0.000138824	Up	gi|764544888|ref|XP_011459448.1|/0/PREDICTED: CBL-interacting serine/threonine-protein kinase 3 isoform X1 [Fragaria vesca subsp. vesca] &gt;gi|764544891|ref|XP_011459449.1| PREDICTED: CBL-interacting serine/threonine-protein kinase 3 isoform X1 [Fragaria vesca subsp. vesca]	gi|470110944|ref|XM_004291670.1|/0.0/PREDICTED: Fragaria vesca subsp. vesca CBL-interacting serine/threonine-protein kinase 3-like (LOC101298966), mRNA	sp|Q2V452|CIPK3_ARATH/0.0/CBL-interacting serine/threonine-protein kinase 3 OS=Arabidopsis thaliana GN=CIPK3 PE=1 SV=2	tcc:TCM_041026/0.0/CBL-interacting protein kinase 3 isoform 3; K07198 5'-AMP-activated protein kinase, catalytic alpha subunit [EC:2.7.11.11]	ECU01g0630/3e-40/---	PS00108/-/Serine/Threonine protein kinases active-site signature.	biological_process:GO:0007165//signal transduction;GO:0006468//protein phosphorylation;cellular_component:GO:0005634//nucleus;GO:0005737//cytoplasm;molecular_function:GO:0004674//protein serine/threonine kinase activity;GO:0005524//ATP binding;
CL2587.Contig1_All	1419	3.43043	4.26e-06	Up	NA	gi|470110265|ref|XR_184037.1|/2e-52/PREDICTED: Fragaria vesca subsp. vesca uncharacterized LOC101295194, transcript variant 2 (LOC101295194), misc_RNA	NA	NA	NA	NA	NA
CL4292.Contig1_All	2183	3.65151	0	Up	gi|470121631|ref|XP_004296866.1|/0/PREDICTED: probable pectinesterase/pectinesterase inhibitor 21 [Fragaria vesca subsp. vesca]	gi|470121630|ref|XM_004296818.1|/0.0/PREDICTED: Fragaria vesca subsp. vesca probable pectinesterase/pectinesterase inhibitor 21-like (LOC101292205), mRNA	sp|Q8GX86|PME21_ARATH/3e-147/Probable pectinesterase/pectinesterase inhibitor 21 OS=Arabidopsis thaliana GN=PME21 PE=2 SV=2	fve:101292205/0.0/probable pectinesterase/pectinesterase inhibitor 21; K01051 pectinesterase [EC:3.1.1.11]	CAC3373/1e-31/---	PS00503/-/Pectinesterase signature 2.	molecular_function:GO:0016788//hydrolase activity, acting on ester bonds;
Unigene20064_All	2629	3.43627	0	Up	gi|922453300|ref|XP_013629245.1|/0/PREDICTED: pollen-specific leucine-rich repeat extensin-like protein 3 [Brassica oleracea var. oleracea]	gi|289629361|gb|AC240102.1|/6e-57/Sisymbrium irio clone SIR-40E09, complete sequence	sp|Q9XIL9|PLRX3_ARATH/0.0/Pollen-specific leucine-rich repeat extensin-like protein 3 OS=Arabidopsis thaliana GN=PEX3 PE=2 SV=1	aip:107619883/8e-99/formin-like protein 20; K02184 formin 2	Rv3876/3e-30/---	PTHR32093/1.6E-206/--	NA
Unigene22653_All	2141	-2.37007	2.83e-06	Down	gi|470104290|ref|XP_004288541.1|/0/PREDICTED: stachyose synthase [Fragaria vesca subsp. vesca]	gi|470104289|ref|XM_004288493.1|/0.0/PREDICTED: Fragaria vesca subsp. vesca stachyose synthase-like (LOC101307049), mRNA	sp|Q93XK2|STSYN_PEA/0.0/Stachyose synthase OS=Pisum sativum GN=STS1 PE=1 SV=1	fve:101307049/0.0/stachyose synthase; K06611 stachyose synthetase [EC:2.4.1.67]	NA	PTHR31268:SF2/0.0/--	molecular_function:GO:0003824//catalytic activity;
CL5092.Contig14_All	1468	1.24115	0.0012868	Up	gi|764566200|ref|XP_011461930.1|/7.71394e-89/PREDICTED: uncharacterized protein LOC101312236 [Fragaria vesca subsp. vesca]	gi|470118238|ref|XM_004295193.1|/0.0/PREDICTED: Fragaria vesca subsp. vesca uncharacterized LOC101312236 (LOC101312236), mRNA	NA	mtr:MTR_8g039210/3e-16/replication factor-A carboxy-terminal domain protein; K07466 replication factor A1	NA	NA	NA
CL831.Contig1_All	803	1.3844	0.00439862	Up	gi|470123848|ref|XP_004297932.1|/1.08936e-86/PREDICTED: uncharacterized protein LOC101311957 [Fragaria vesca subsp. vesca]	gi|470123847|ref|XM_004297884.1|/0.0/PREDICTED: Fragaria vesca subsp. vesca uncharacterized LOC101311957 (LOC101311957), mRNA	sp|Q9FPQ6|GP1_CHLRE/2e-14/Vegetative cell wall protein gp1 OS=Chlamydomonas reinhardtii GN=GP1 PE=1 SV=1	dosa:Os04t0498700-01/1e-13/Os04g0498700; Haem peroxidase family protein.; K00430 peroxidase [EC:1.11.1.7]	mlr2363/3e-09/---	NA	NA
CL8431.Contig1_All	6237	1.20628	6.7e-16	Up	gi|470137167|ref|XP_004304342.1|/0/PREDICTED: LOW QUALITY PROTEIN: ABC transporter A family member 1 [Fragaria vesca subsp. vesca]	gi|470137166|ref|XM_004304294.1|/0.0/PREDICTED: Fragaria vesca subsp. vesca ABC transporter A family member 1-like (LOC101308109), mRNA	sp|Q84M24|AB1A_ARATH/0.0/ABC transporter A family member 1 OS=Arabidopsis thaliana GN=ABCA1 PE=2 SV=2	fve:101308109/0.0/ABC transporter A family member 1; K05643 ATP-binding cassette, subfamily A (ABC1), member 3	PH0820/3e-39/---	PS00211/-/ABC transporters family signature.	biological_process:GO:0006810//transport;cellular_component:GO:0005774//vacuolar membrane;GO:0016021//integral component of membrane;molecular_function:GO:0005524//ATP binding;GO:0005215//transporter activity;GO:0016887//ATPase activity;
CL6913.Contig2_All	2127	1.22763	0.000599938	Up	gi|764580614|ref|XP_011463874.1|/1.02551e-143/PREDICTED: uncharacterized protein LOC101308184 isoform X2 [Fragaria vesca subsp. vesca]	gi|470129781|ref|XM_004300739.1|/0.0/PREDICTED: Fragaria vesca subsp. vesca uncharacterized LOC101308184 (LOC101308184), mRNA	NA	NA	NA	NA	NA
Unigene13412_All	1177	-1.31818	4.39e-05	Down	gi|470105574|ref|XP_004289157.1|/3.18884e-124/PREDICTED: cyclin-U1-1 [Fragaria vesca subsp. vesca]	gi|470105573|ref|XM_004289109.1|/0.0/PREDICTED: Fragaria vesca subsp. vesca cyclin-U1-1-like (LOC101295955), mRNA	sp|Q9LJ45|CCU11_ARATH/7e-66/Cyclin-U1-1 OS=Arabidopsis thaliana GN=CYCU1-1 PE=1 SV=1	bna:106363601/3e-32/uncharacterized LOC106363601; K01647 citrate synthase [EC:2.3.3.1]	NA	PF08613/4.9E-36/Cyclin	biological_process:GO:0000079//regulation of cyclin-dependent protein serine/threonine kinase activity;molecular_function:GO:0019901//protein kinase binding;
Unigene4921_All	1189	4.83531	8.49e-16	Up	gi|470137307|ref|XP_004304410.1|/0/PREDICTED: peroxidase 21 [Fragaria vesca subsp. vesca]	gi|470137306|ref|XM_004304362.1|/0.0/PREDICTED: Fragaria vesca subsp. vesca peroxidase 21-like (LOC101304986), mRNA	sp|Q42580|PER21_ARATH/1e-133/Peroxidase 21 OS=Arabidopsis thaliana GN=PER21 PE=1 SV=1	fve:101304986/0.0/peroxidase 21; K00430 peroxidase [EC:1.11.1.7]	NA	PR00461/3.8E-38/Plant peroxidase signature	biological_process:GO:0055114//oxidation-reduction process;GO:0006979//response to oxidative stress;GO:0009664//plant-type cell wall organization;GO:0098869//cellular oxidant detoxification;GO:0042744//hydrogen peroxide catabolic process;cellular_component:GO:0009505//plant-type cell wall;GO:0005576//extracellular region;molecular_function:GO:0020037//heme binding;GO:0046872//metal ion binding;GO…
Unigene23081_All	341	-1.03077	1.27e-07	Down	gi|764522190|ref|XP_011470973.1|/2.67468e-32/PREDICTED: putative glycine-rich cell wall structural protein 1 [Fragaria vesca subsp. vesca]	NA	NA	NA	NA	NA	NA
CL1755.Contig2_All	2759	2.17503	2.34e-09	Up	gi|764554800|ref|XP_011460541.1|/0/PREDICTED: uncharacterized protein LOC101291707 isoform X2 [Fragaria vesca subsp. vesca]	gi|470118842|ref|XM_004295483.1|/0.0/PREDICTED: Fragaria vesca subsp. vesca uncharacterized LOC101291707 (LOC101291707), mRNA	sp|Q7XI08|XB34_ORYSJ/1e-07/Probable E3 ubiquitin-protein ligase XBOS34 OS=Oryza sativa subsp. japonica GN=XBOS34 PE=2 SV=1	pda:103713536/1e-32/uncharacterized LOC103713536; K01931 protein neuralized [EC:2.3.2.27]	NA	PTHR10044/3.0E-26/--	NA
CL1720.Contig8_All	893	-2.51828	0.000144143	Down	gi|764646207|ref|XP_011457537.1|/9.90642e-143/PREDICTED: uncharacterized protein LOC101307368 [Fragaria vesca subsp. vesca]	gi|470149252|ref|XR_185528.1|/0.0/PREDICTED: Fragaria vesca subsp. vesca uncharacterized LOC101307368 (LOC101307368), misc_RNA	sp|P13983|EXTN_TOBAC/1e-22/Extensin OS=Nicotiana tabacum GN=HRGPNT3 PE=2 SV=1	nnu:104597147/1e-18/RNA polymerase II-associated factor 1 homolog; K15174 RNA polymerase II-associated factor 1	Rv1078/5e-09/---	NA	NA
CL5574.Contig3_All	2271	1.29326	0.00101099	Up	gi|470136217|ref|XP_004303893.1|/1.01719e-80/PREDICTED: glutathione S-transferase F9-like [Fragaria vesca subsp. vesca]	gi|470136218|ref|XM_004303846.1|/0.0/PREDICTED: Fragaria vesca subsp. vesca glutathione S-transferase F9-like, transcript variant 2 (LOC101315068), mRNA	sp|O80852|GSTF9_ARATH/2e-58/Glutathione S-transferase F9 OS=Arabidopsis thaliana GN=GSTF9 PE=1 SV=1	fve:101315068/2e-81/glutathione S-transferase F9-like; K00799 glutathione S-transferase [EC:2.5.1.18]	RSc0992_2/4e-06/---	PTHR11260:SF186/3.3E-72/--	NA
CL250.Contig2_All	419	2.71996	0.000249062	Up	gi|400131578|emb|CCH50978.1|/3.33113e-22/T4.17 [Malus x robusta]	gi|400131561|emb|HE805490.1|/3e-30/Malus x robusta DNA fragment spanning resistance locus against Erwinia amylovora on linkage group 3, clone 16k15 contig4/4	NA	NA	NA	PF05553/3.2E-14/Cotton fibre expressed protein	NA
Unigene3875_All	1106	2.66037	6.59e-10	Up	gi|764632548|ref|XP_011469773.1|/1.51139e-88/PREDICTED: major pollen allergen Ole e 10-like [Fragaria vesca subsp. vesca]	gi|470146489|ref|XM_004308809.1|/0.0/PREDICTED: Fragaria vesca subsp. vesca glucan endo-1,3-beta-glucosidase-like (LOC101294900), mRNA	sp|P52409|E13B_WHEAT/6e-23/Glucan endo-1,3-beta-glucosidase OS=Triticum aestivum GN=GLC1 PE=2 SV=1	zma:100285928/1e-18/GRMZM2G325008; glucan endo-1,3-beta-glucosidase 3; K19891 glucan endo-1,3-beta-glucosidase 1/2/3 [EC:3.2.1.39]	NA	SM00768/5.8E-41/Possibly involved in carbohydrate binding	NA
CL8433.Contig1_All	1428	1.2634	4.58e-17	Up	gi|470102187|ref|XP_004287539.1|/1.23542e-176/PREDICTED: 1-aminocyclopropane-1-carboxylate oxidase 1-like [Fragaria vesca subsp. vesca]	gi|470102186|ref|XM_004287491.1|/0.0/PREDICTED: Fragaria vesca subsp. vesca 1-aminocyclopropane-1-carboxylate oxidase 1-like (LOC101291370), mRNA	sp|Q9ZUN4|ACCO1_ARATH/2e-135/1-aminocyclopropane-1-carboxylate oxidase 1 OS=Arabidopsis thaliana GN=ACO1 PE=2 SV=1	fve:101291370/2e-177/1-aminocyclopropane-1-carboxylate oxidase 1-like; K05933 aminocyclopropanecarboxylate oxidase [EC:1.14.17.4]	PA4191/8e-19/---	PTHR10209/1.7E-86/--	NA
CL350.Contig2_All	852	2.01098	1.13e-06	Up	gi|645276149|ref|XP_008243150.1|/2.86922e-27/PREDICTED: protein IDA [Prunus mume]	gi|255566802|ref|XM_002524339.1|/4e-06/Ricinus communis conserved hypothetical protein, mRNA	sp|Q8LAD7|IDA_ARATH/1e-06/Protein IDA OS=Arabidopsis thaliana GN=IDA PE=2 SV=1	NA	NA	NA	NA
CL1447.Contig7_All	2410	1.57051	0.000529862	Up	gi|470122298|ref|XP_004297181.1|/0/PREDICTED: chaperonin 60 subunit beta 4, chloroplastic isoform X1 [Fragaria vesca subsp. vesca]	gi|470122297|ref|XM_004297133.1|/0.0/PREDICTED: Fragaria vesca subsp. vesca chaperonin 60 subunit beta 4, chloroplastic-like (LOC101293290), mRNA	sp|Q9C667|CPNB4_ARATH/0.0/Chaperonin 60 subunit beta 4, chloroplastic OS=Arabidopsis thaliana GN=CPN60B4 PE=1 SV=1	fve:101293290/0.0/chaperonin 60 subunit beta 4, chloroplastic; K04077 chaperonin GroEL	alr1896/3e-135/---	PTHR11353/6.5E-148/--	biological_process:GO:0042026//protein refolding;cellular_component:GO:0009941//chloroplast envelope;GO:0009570//chloroplast stroma;molecular_function:GO:0005524//ATP binding;
Unigene8572_All	1016	-2.42638	2.15e-164	Down	gi|764621796|ref|XP_011468708.1|/1.63706e-62/PREDICTED: gibberellin-regulated protein 14 [Fragaria vesca subsp. vesca]	gi|470137661|ref|XM_004304534.1|/0.0/PREDICTED: Fragaria vesca subsp. vesca uncharacterized LOC101308199 (LOC101308199), mRNA	sp|Q9LFR3|GASAE_ARATH/2e-25/Gibberellin-regulated protein 14 OS=Arabidopsis thaliana GN=GASA14 PE=1 SV=1	nnu:104608881/9e-07/uncharacterized LOC104608881; K03860 phosphatidylinositol glycan, class Q	NA	PF02704/3.6E-11/Gibberellin regulated protein	NA
CL1400.Contig1_All	2998	3.15389	2.74e-38	Up	gi|470140787|ref|XP_004306120.1|/0/PREDICTED: probable serine/threonine-protein kinase At1g54610 [Fragaria vesca subsp. vesca]	gi|470140786|ref|XM_004306072.1|/0.0/PREDICTED: Fragaria vesca subsp. vesca probable serine/threonine-protein kinase At1g54610-like (LOC101314206), mRNA	sp|Q9ZVM9|Y1461_ARATH/1e-145/Probable serine/threonine-protein kinase At1g54610 OS=Arabidopsis thaliana GN=At1g54610 PE=1 SV=1	pmum:103330052/0.0/probable serine/threonine-protein kinase At1g54610; K08819 cyclin-dependent kinase 12/13 [EC:2.7.11.22 2.7.11.23]	ECU02g1450/4e-42/---	PTHR24056:SF179/8.7E-240/--	biological_process:GO:0006468//protein phosphorylation;molecular_function:GO:0004674//protein serine/threonine kinase activity;GO:0005524//ATP binding;
CL1592.Contig5_All	7545	-1.56269	1.17e-77	Down	gi|923822424|ref|XP_013694709.1|/0/PREDICTED: nascent polypeptide-associated complex subunit alpha, muscle-specific form-like, partial [Brassica napus]	gi|470108478|ref|XM_004290496.1|/0.0/PREDICTED: Fragaria vesca subsp. vesca uncharacterized LOC101304055 (LOC101304055), mRNA	sp|Q9ZQI0|EPR1_ARATH/5e-148/Proline-rich extensin-like protein EPR1 OS=Arabidopsis thaliana GN=EPR1 PE=2 SV=1	bvg:104905407/0.0/mucin-2-like; K10955 intestinal mucin-2	SPBC28F2.12/9e-36/---	NA	NA
CL5681.Contig2_All	400	2.19864	0.00417843	Up	gi|596298506|ref|XP_007227504.1|/1.99728e-27/hypothetical protein PRUPE_ppa014371mg [Prunus persica] &gt;gi|462424440|gb|EMJ28703.1| hypothetical protein PRUPE_ppa014371mg [Prunus persica]	gi|470104100|ref|XM_004288405.1|/1e-149/PREDICTED: Fragaria vesca subsp. vesca inhibitor of trypsin and hageman factor-like (LOC101303453), mRNA	sp|P19873|ITH5_CUCMA/5e-13/Inhibitor of trypsin and hageman factor OS=Cucurbita maxima PE=1 SV=1	NA	NA	PS00285/-/Potato inhibitor I family signature.	biological_process:GO:0009611//response to wounding;GO:0010951//negative regulation of endopeptidase activity;molecular_function:GO:0004867//serine-type endopeptidase inhibitor activity;
CL1800.Contig1_All	724	-1.05806	2.94e-05	Down	gi|470103508|ref|XP_004288178.1|/6.71627e-50/PREDICTED: polyadenylate-binding protein 2-like [Fragaria vesca subsp. vesca]	gi|470103507|ref|XM_004288130.1|/0.0/PREDICTED: Fragaria vesca subsp. vesca polyadenylate-binding protein 2-like (LOC101314216), mRNA	sp|B0Z5H1|YCF2_OENPA/7e-11/Protein Ycf2 OS=Oenothera parviflora GN=ycf2-A PE=3 SV=1	fve:101314216/1e-50/polyadenylate-binding protein 2-like; K14396 polyadenylate-binding protein 2	YOR310c/2e-11/---	PTHR23365/3.6E-20/--	NA
CL3123.Contig3_All	1872	-1.28055	4.33e-05	Down	gi|470108302|ref|XP_004290460.1|/7.21412e-130/PREDICTED: uncharacterized protein LOC101302127 [Fragaria vesca subsp. vesca] &gt;gi|764532470|ref|XP_011458452.1| PREDICTED: uncharacterized protein LOC101302127 [Fragaria vesca subsp. vesca]	gi|470108301|ref|XM_004290412.1|/0.0/PREDICTED: Fragaria vesca subsp. vesca uncharacterized LOC101302127 (LOC101302127), mRNA	NA	NA	BH0837/1e-14/---	NA	NA
Unigene6034_All	2589	-1.15444	1.5e-08	Down	gi|764535077|ref|XP_011458663.1|/0/PREDICTED: auxin response factor 23-like isoform X1 [Fragaria vesca subsp. vesca]	gi|470112810|ref|XM_004292576.1|/0.0/PREDICTED: Fragaria vesca subsp. vesca auxin response factor 23-like (LOC101299450), mRNA	sp|Q0JCZ4|ARFI_ORYSJ/8e-132/Auxin response factor 9 OS=Oryza sativa subsp. japonica GN=ARF9 PE=2 SV=1	gmx:100802387/2e-164/auxin response factor 2-like; K14486 auxin response factor	NA	PTHR31384:SF7/8.4E-197/--	NA
Unigene11760_All	951	4.74159	1.45e-33	Up	gi|470119271|ref|XP_004295738.1|/6.71924e-116/PREDICTED: uncharacterized protein LOC101296649 [Fragaria vesca subsp. vesca]	gi|470119270|ref|XM_004295690.1|/0.0/PREDICTED: Fragaria vesca subsp. vesca uncharacterized LOC101296649 (LOC101296649), mRNA	NA	NA	NA	PTHR31964/1.3E-23/--	NA
CL1813.Contig1_All	1226	-1.43883	0.00010831	Down	gi|470149134|ref|XP_004310097.1|/4.53486e-153/PREDICTED: squamosa promoter-binding-like protein 16 [Fragaria vesca subsp. vesca] &gt;gi|764645746|ref|XP_011457497.1| PREDICTED: squamosa promoter-binding-like protein 16 [Fragaria vesca subsp. vesca]	gi|470149133|ref|XM_004310049.1|/0.0/PREDICTED: Fragaria vesca subsp. vesca uncharacterized LOC101314819 (LOC101314819), mRNA	sp|Q6YZE8|SPL16_ORYSJ/2e-38/Squamosa promoter-binding-like protein 16 OS=Oryza sativa subsp. japonica GN=SPL16 PE=2 SV=1	mdm:103401427/5e-18/uncharacterized LOC103401427; K13415 protein brassinosteroid insensitive 1 [EC:2.7.10.1 2.7.11.1]	NA	PS51141/31.787/Zinc finger SBP-type profile.	NA
Unigene5838_All	4898	-2.56813	0.000982393	Down	gi|470134346|ref|XP_004303015.1|/0/PREDICTED: pleiotropic drug resistance protein 2 [Fragaria vesca subsp. vesca] &gt;gi|764603294|ref|XP_011466786.1| PREDICTED: pleiotropic drug resistance protein 2 [Fragaria vesca subsp. vesca]	gi|470134345|ref|XM_004302967.1|/0.0/PREDICTED: Fragaria vesca subsp. vesca pleiotropic drug resistance protein 2-like, transcript variant 2 (LOC101301404), mRNA	sp|Q2PCF1|PDR2_NICPL/0.0/Pleiotropic drug resistance protein 2 OS=Nicotiana plumbaginifolia GN=PDR2 PE=1 SV=1	cme:CYME_CMS467C/2e-43/ATP-binding cassette, sub-family G, member 2; K05681 ATP-binding cassette, subfamily G (WHITE), member 2	YDR406w_3/1e-57/---	SM00382/8.8E-9/ATPases associated with a variety of cellular activities	biological_process:GO:0006810//transport;cellular_component:GO:0016021//integral component of membrane;molecular_function:GO:0005524//ATP binding;GO:0016887//ATPase activity;
Unigene20508_All	1163	1.14703	2.73e-05	Up	gi|470142243|ref|XP_004306821.1|/3.79605e-146/PREDICTED: C2 domain-containing protein At1g63220-like isoform X1 [Fragaria vesca subsp. vesca]	gi|470142242|ref|XM_004306773.1|/0.0/PREDICTED: Fragaria vesca subsp. vesca C2 domain-containing protein At1g63220-like, transcript variant 1 (LOC101313347), mRNA	sp|Q9C8S6|Y1322_ARATH/4e-40/C2 domain-containing protein At1g63220 OS=Arabidopsis thaliana GN=At1g63220 PE=1 SV=1	sita:101760718/9e-24/triosephosphate isomerase, cytosolic; K01803 triosephosphate isomerase (TIM) [EC:5.3.1.1]	BB0801/7e-10/---	PTHR10774/2.1E-26/--	NA
CL6584.Contig2_All	691	-1.09752	0.00517948	Down	gi|470144669|ref|XP_004307971.1|/1.33449e-121/PREDICTED: cyclic nucleotide-gated ion channel 1-like [Fragaria vesca subsp. vesca]	gi|470144668|ref|XM_004307923.1|/0.0/PREDICTED: Fragaria vesca subsp. vesca cyclic nucleotide-gated ion channel 1-like (LOC101308225), mRNA	sp|O65717|CNGC1_ARATH/5e-34/Cyclic nucleotide-gated ion channel 1 OS=Arabidopsis thaliana GN=CNGC1 PE=1 SV=1	fve:101308225/3e-122/cyclic nucleotide-gated ion channel 1-like; K05391 cyclic nucleotide gated channel, other eukaryote	NA	PF00027/7.4E-5/Cyclic nucleotide-binding domain	biological_process:GO:0055085//transmembrane transport;GO:0006811//ion transport;cellular_component:GO:0016020//membrane;
CL4343.Contig4_All	1634	-1.12378	5.35e-05	Down	gi|764604615|ref|XP_011466900.1|/0/PREDICTED: putative ubiquitin-conjugating enzyme E2 38 isoform X2 [Fragaria vesca subsp. vesca]	gi|470134553|ref|XM_004303065.1|/0.0/PREDICTED: Fragaria vesca subsp. vesca probable ubiquitin-conjugating enzyme E2 25-like (LOC101308002), mRNA	sp|Q9LUQ5|UBC25_ARATH/4e-99/Probable ubiquitin-conjugating enzyme E2 25 OS=Arabidopsis thaliana GN=UBC25 PE=2 SV=1	mdm:103405663/4e-156/probable ubiquitin-conjugating enzyme E2 25; K10581 ubiquitin-conjugating enzyme E2 O [EC:2.3.2.24]	SPAC18B11.07c/5e-11/---	PTHR24067/8.0E-135/--	NA
Unigene6306_All	1052	3.37274	7.32e-06	Up	gi|764536691|ref|XP_011458800.1|/1.15769e-42/PREDICTED: uncharacterized protein LOC101304251 [Fragaria vesca subsp. vesca]	NA	NA	egr:104427482/2e-08/uncharacterized LOC104427482; K14794 ribosomal RNA-processing protein 12	NA	PF14244/1.7E-13/gag-polypeptide of LTR copia-type	NA
CL7212.Contig1_All	1577	1.59786	7.69e-18	Up	gi|470135977|ref|XP_004303779.1|/1.71771e-57/PREDICTED: uncharacterized protein LOC101302090 [Fragaria vesca subsp. vesca]	gi|470135976|ref|XM_004303731.1|/0.0/PREDICTED: Fragaria vesca subsp. vesca uncharacterized LOC101302090 (LOC101302090), mRNA	sp|O23262|RLF32_ARATH/2e-06/Protein RALF-like 32 OS=Arabidopsis thaliana GN=RALFL32 PE=3 SV=1	mdm:103443692/2e-09/mannan endo-1,4-beta-mannosidase 4-like; K19355 mannan endo-1,4-beta-mannosidase [EC:3.2.1.78]	NA	NA	NA
CL7112.Contig1_All	1271	-4.74521	5.19e-12	Down	gi|470133808|ref|XP_004302751.1|/3.99188e-176/PREDICTED: protein SRG1-like [Fragaria vesca subsp. vesca]	gi|470133807|ref|XM_004302703.1|/0.0/PREDICTED: Fragaria vesca subsp. vesca protein SRG1-like (LOC101297264), mRNA	sp|Q39224|SRG1_ARATH/2e-65/Protein SRG1 OS=Arabidopsis thaliana GN=SRG1 PE=2 SV=1	sind:105156784/7e-50/leucoanthocyanidin dioxygenase-like; K05277 leucoanthocyanidin dioxygenase [EC:1.14.11.19]	PA0147/3e-28/---	PF03171/2.2E-23/2OG-Fe(II) oxygenase superfamily	biological_process:GO:0055114//oxidation-reduction process;molecular_function:GO:0046872//metal ion binding;GO:0016491//oxidoreductase activity;
CL6279.Contig1_All	1556	3.71823	6.47e-10	Up	gi|470130056|ref|XP_004300922.1|/0/PREDICTED: peroxidase 57-like [Fragaria vesca subsp. vesca]	gi|470130055|ref|XM_004300874.1|/0.0/PREDICTED: Fragaria vesca subsp. vesca peroxidase 57-like (LOC101302460), mRNA	sp|A7QEU4|PER5_VITVI/4e-67/Peroxidase 5 OS=Vitis vinifera GN=GSVIVT00037159001 PE=1 SV=2	fve:101311154/3e-125/peroxidase 5-like; K00430 peroxidase [EC:1.11.1.7]	STM0960/1e-15/---	PR00458/1.1E-27/Haem peroxidase superfamily signature	NA
Unigene8190_All	1271	1.3993	0.0046655	Up	gi|764591959|ref|XP_011465323.1|/2.21203e-25/PREDICTED: LOW QUALITY PROTEIN: telomere repeat-binding protein 5 [Fragaria vesca subsp. vesca]	gi|470128996|ref|XR_184744.1|/0.0/PREDICTED: Fragaria vesca subsp. vesca telomere repeat-binding protein 5-like (LOC101312734), misc_RNA	sp|Q6R0E3|TRP5_ARATH/2e-20/Telomere repeat-binding protein 5 OS=Arabidopsis thaliana GN=TRP5 PE=1 SV=2	smo:SELMODRAFT_442478/2e-14/hypothetical protein; K03255 protein TIF31	NA	NA	NA
Unigene16458_All	916	2.33607	0.00145149	Up	gi|764634115|ref|XP_011469950.1|/8.71401e-57/PREDICTED: cation/H(+) antiporter 15-like [Fragaria vesca subsp. vesca]	gi|470146699|ref|XM_004308912.1|/2e-66/PREDICTED: Fragaria vesca subsp. vesca cation/H(+) antiporter 15-like (LOC101306389), mRNA	sp|Q9M007|CHX27_ARATH/2e-16/Cation/H(+) antiporter 27 OS=Arabidopsis thaliana GN=CHX27 PE=2 SV=2	NA	NA	PTHR32468/4.6E-24/--	biological_process:GO:1902600//hydrogen ion transmembrane transport;cellular_component:GO:0016021//integral component of membrane;molecular_function:GO:0015299//solute:proton antiporter activity;
Unigene8096_All	3767	1.29944	3.06e-06	Up	gi|674887096|emb|CDY45505.1|/3.144e-132/BnaCnng12640D [Brassica napus]	gi|154183871|gb|EU024828.1|/0.0/Fragaria vesca subsp. americana clone fosmid 11D02, complete sequence	sp|P93276|M030_ARATH/2e-31/Uncharacterized mitochondrial protein AtMg00030 OS=Arabidopsis thaliana GN=AtMg00030 PE=4 SV=1	NA	NA	NA	cellular_component:GO:0005739//mitochondrion;
CL349.Contig5_All	4709	1.19969	0.000931276	Up	gi|764580032|ref|XP_004298699.2|/0/PREDICTED: probable disease resistance protein At4g27220 isoform X1 [Fragaria vesca subsp. vesca]	gi|470125417|ref|XM_004298651.1|/0.0/PREDICTED: Fragaria vesca subsp. vesca uncharacterized LOC101301584 (LOC101301584), mRNA	sp|O81825|DRL28_ARATH/8e-56/Probable disease resistance protein At4g27220 OS=Arabidopsis thaliana GN=At4g27220 PE=2 SV=1	mdm:103426644/6e-165/probable disease resistance protein At4g27220; K13459 disease resistance protein RPS2	NA	PTHR23155:SF461/4.1E-56/--	NA
CL1898.Contig1_All	1389	2.47563	0.00148798	Up	NA	gi|470108211|ref|XM_004290372.1|/0.0/PREDICTED: Fragaria vesca subsp. vesca uncharacterized LOC101312791 (LOC101312791), mRNA	NA	NA	NA	NA	NA
CL7491.Contig3_All	1021	-1.46314	0.000294785	Down	gi|470104889|ref|XP_004288825.1|/3.88981e-138/PREDICTED: gibberellin 3-beta-dioxygenase 1-like [Fragaria vesca subsp. vesca]	gi|470104888|ref|XM_004288777.1|/0.0/PREDICTED: Fragaria vesca subsp. vesca gibberellin 3-beta-dioxygenase 3-like (LOC101304518), mRNA	sp|O24648|G3OX_PEA/6e-57/Gibberellin 3-beta-dioxygenase 1 OS=Pisum sativum GN=LE PE=1 SV=1	fve:101304518/7e-139/gibberellin 3-beta-dioxygenase 1-like; K04124 gibberellin 3-beta-dioxygenase [EC:1.14.11.15]	PA0147/7e-08/---	PF03171/1.8E-13/2OG-Fe(II) oxygenase superfamily	NA
CL2125.Contig2_All	1921	2.1812	0.00418131	Up	gi|470102630|ref|XP_004287754.1|/0/PREDICTED: F-box protein SKIP23-like [Fragaria vesca subsp. vesca] &gt;gi|470102632|ref|XP_004287755.1| PREDICTED: F-box protein SKIP23-like [Fragaria vesca subsp. vesca]	gi|470102627|ref|XM_004287705.1|/0.0/PREDICTED: Fragaria vesca subsp. vesca F-box protein SKIP23-like (LOC101307723), mRNA	sp|Q3EBZ2|SKI23_ARATH/8e-33/F-box protein SKIP23 OS=Arabidopsis thaliana GN=SKIP23 PE=1 SV=1	NA	NA	PF03478/2.2E-16/Protein of unknown function (DUF295)	NA
CL7729.Contig2_All	968	3.59588	3.41e-13	Up	gi|764621352|ref|XP_011468638.1|/9.0337e-108/PREDICTED: uncharacterized protein LOC105352723 [Fragaria vesca subsp. vesca]	NA	NA	NA	NA	PTHR31852/3.5E-15/--	NA
CL2543.Contig2_All	1021	2.58622	1.27e-27	Up	gi|470135856|ref|XP_004303723.1|/3.21846e-66/PREDICTED: auxin-repressed 12.5 kDa protein isoform X1 [Fragaria vesca subsp. vesca]	gi|470135855|ref|XM_004303675.1|/0.0/PREDICTED: Fragaria vesca subsp. vesca uncharacterized LOC101308693, transcript variant 2 (LOC101308693), mRNA	sp|Q05349|12KD_FRAAN/5e-07/Auxin-repressed 12.5 kDa protein OS=Fragaria ananassa PE=2 SV=1	NA	NA	PF05564/2.1E-18/Dormancy/auxin associated protein	NA
Unigene8852_All	733	-1.15611	3.15e-13	Down	NA	NA	NA	NA	NA	NA	NA
Unigene20498_All	2239	-1.1065	3.88e-76	Down	gi|470109042|ref|XP_004290811.1|/0/PREDICTED: pectinesterase-like [Fragaria vesca subsp. vesca]	gi|470109041|ref|XM_004290763.1|/0.0/PREDICTED: Fragaria vesca subsp. vesca probable pectinesterase/pectinesterase inhibitor 40-like (LOC101313376), mRNA	sp|O81301|PME40_ARATH/1e-147/Probable pectinesterase/pectinesterase inhibitor 40 OS=Arabidopsis thaliana GN=PME40 PE=2 SV=1	fve:101313376/0.0/pectinesterase-like; K01051 pectinesterase [EC:3.1.1.11]	CAC3373/3e-35/---	SM00856/3.3E-27/Plant invertase/pectin methylesterase inhibitor	biological_process:GO:0045490//pectin catabolic process;GO:0043086//negative regulation of catalytic activity;GO:0042545//cell wall modification;cellular_component:GO:0005618//cell wall;molecular_function:GO:0045330//aspartyl esterase activity;GO:0004857//enzyme inhibitor activity;GO:0030599//pectinesterase activity;
CL4941.Contig6_All	1864	1.56298	0.00221353	Up	NA	gi|502151746|ref|XM_004508536.1|/4e-11/PREDICTED: Cicer arietinum protein Dr1 homolog (LOC101512449), transcript variant X2, mRNA	NA	NA	NA	NA	NA
CL3958.Contig2_All	1067	-1.70951	8.3e-09	Down	gi|764512165|ref|XP_004289090.2|/7.16474e-165/PREDICTED: uncharacterized protein LOC101298943 [Fragaria vesca subsp. vesca]	gi|470105436|ref|XM_004289042.1|/0.0/PREDICTED: Fragaria vesca subsp. vesca uncharacterized LOC101298943 (LOC101298943), mRNA	NA	NA	NA	PTHR31579:SF2/5.1E-95/--	NA
CL679.Contig11_All	2115	1.04352	0.00190091	Up	gi|470127699|ref|XP_004299803.1|/6.54349e-09/PREDICTED: transmembrane protein 230-like [Fragaria vesca subsp. vesca] &gt;gi|470127701|ref|XP_004299804.1| PREDICTED: transmembrane protein 230-like [Fragaria vesca subsp. vesca]	gi|470137930|ref|XM_004304665.1|/2e-22/PREDICTED: Fragaria vesca subsp. vesca ABC transporter C family member 12-like (LOC101298730), mRNA	NA	NA	NA	NA	cellular_component:GO:0016020//membrane;
CL8261.Contig2_All	1792	-4.4371	6.2e-13	Down	gi|470130932|ref|XP_004301355.1|/0/PREDICTED: (-)-germacrene D synthase-like isoform X2 [Fragaria vesca subsp. vesca]	gi|470130931|ref|XM_004301307.1|/0.0/PREDICTED: Fragaria vesca subsp. vesca (-)-germacrene D synthase-like (LOC101306242), mRNA	sp|Q6Q3H3|TPSGD_VITVI/0.0/(-)-germacrene D synthase OS=Vitis vinifera GN=VIT_19s0014g04930 PE=1 SV=1	fve:101302497/0.0/(-)-germacrene D synthase-like; K15803 (-)-germacrene D synthase [EC:4.2.3.22 4.2.3.75]	NA	PTHR31225/9.9E-218/--	NA
Unigene24691_All	1443	2.19652	0.00477183	Up	gi|764584989|ref|XP_011464473.1|/0/PREDICTED: extra-large guanine nucleotide-binding protein 3-like isoform X1 [Fragaria vesca subsp. vesca]	gi|470127076|ref|XM_004299457.1|/0.0/PREDICTED: Fragaria vesca subsp. vesca uncharacterized LOC101299673 (LOC101299673), mRNA	sp|Q9C516|XLG3_ARATH/9e-127/Extra-large guanine nucleotide-binding protein 3 OS=Arabidopsis thaliana GN=XLG3 PE=1 SV=1	dosa:Os10t0117800-01/2e-113/Os10g0117800; Guanine nucleotide binding protein (G-protein), alpha subunit family protein.; K04630 guanine nucleotide-binding protein G(i) subunit alpha	NA	PF00503/5.5E-52/G-protein alpha subunit	biological_process:GO:0007186//G-protein coupled receptor signaling pathway;molecular_function:GO:0031683//G-protein beta/gamma-subunit complex binding;GO:0004871//signal transducer activity;GO:0005525//GTP binding;GO:0003924//GTPase activity;
Unigene16482_All	485	1.89598	0.000972342	Up	gi|255545390|ref|XP_002513755.1|/2.17629e-14/PREDICTED: defensin Ec-AMP-D2 [Ricinus communis] &gt;gi|223546841|gb|EEF48338.1| Low-molecular-weight cysteine-rich protein LCR69 precursor, putative [Ricinus communis]	NA	sp|A3FPF2|DEF_NELNU/4e-13/Defensin-like protein OS=Nelumbo nucifera PE=3 SV=1	NA	NA	PF00304/5.6E-7/Gamma-thionin family	NA
CL453.Contig9_All	1710	-3.38011	4.93e-10	Down	gi|470141846|ref|XP_004306637.1|/0/PREDICTED: heat shock cognate 70 kDa protein-like [Fragaria vesca subsp. vesca]	gi|470141845|ref|XM_004306589.1|/0.0/PREDICTED: Fragaria vesca subsp. vesca heat shock cognate 70 kDa protein-like (LOC101303062), mRNA	sp|P09189|HSP7C_PETHY/1e-175/Heat shock cognate 70 kDa protein OS=Petunia hybrida GN=HSP70 PE=2 SV=1	fve:101303062/0.0/heat shock cognate 70 kDa protein-like; K03283 heat shock 70kDa protein 1/8	SPAC13G7.02c/1e-145/---	PTHR19375:SF171/1.5E-270/--	NA
Unigene6966_All	1024	3.38306	1.87e-06	Up	gi|764639393|ref|XP_011470593.1|/7.64502e-177/PREDICTED: uncharacterized protein LOC105353273 [Fragaria vesca subsp. vesca]	gi|470146397|ref|XM_004308765.1|/5e-40/PREDICTED: Fragaria vesca subsp. vesca probable nitrate excretion transporter 2-like (LOC101305121), mRNA	NA	NA	NA	NA	NA
Unigene23168_All	1183	1.94831	0.000655106	Up	gi|470113534|ref|XP_004292978.1|/0/PREDICTED: ACT domain-containing protein ACR2 [Fragaria vesca subsp. vesca] &gt;gi|764541862|ref|XP_011459167.1| PREDICTED: ACT domain-containing protein ACR2 [Fragaria vesca subsp. vesca]	gi|470113533|ref|XM_004292930.1|/0.0/PREDICTED: Fragaria vesca subsp. vesca uncharacterized LOC101293754 (LOC101293754), mRNA	NA	mdm:103415977/2e-15/GTP-binding protein At2g22870-like; K03978 GTP-binding protein	NA	PF01842/3.0E-8/ACT domain	NA
Unigene15943_All	877	3.78694	3.58e-86	Up	gi|470119037|ref|XP_004295624.1|/9.20385e-61/PREDICTED: protein RALF-like 19 [Fragaria vesca subsp. vesca]	gi|470119036|ref|XM_004295576.1|/0.0/PREDICTED: Fragaria vesca subsp. vesca rapid alkalinization factor-like (LOC101302053), mRNA	sp|Q6NME6|RLF19_ARATH/2e-21/Protein RALF-like 19 OS=Arabidopsis thaliana GN=RALFL19 PE=3 SV=1	NA	NA	PF05498/1.4E-26/Rapid ALkalinization Factor (RALF)	NA
CL3225.Contig11_All	4838	-6.06846	6.22e-22	Down	gi|470123336|ref|XP_004297683.1|/0/PREDICTED: paired amphipathic helix protein Sin3-like 4 isoform X3 [Fragaria vesca subsp. vesca]	gi|470123335|ref|XM_004297635.1|/0.0/PREDICTED: Fragaria vesca subsp. vesca paired amphipathic helix protein Sin3-like 4-like (LOC101298993), mRNA	sp|O04539|SNL4_ARATH/0.0/Paired amphipathic helix protein Sin3-like 4 OS=Arabidopsis thaliana GN=SNL4 PE=3 SV=3	fve:101298993/0.0/paired amphipathic helix protein Sin3-like 4; K11644 paired amphipathic helix protein Sin3a	YOL004w/3e-36/---	PS51477/19.725/PAH domain profile.	NA
CL6174.Contig1_All	1951	-1.23022	5.79e-20	Down	gi|470123310|ref|XP_004297670.1|/0/PREDICTED: IAA-amino acid hydrolase ILR1-like 1 [Fragaria vesca subsp. vesca]	gi|470123309|ref|XM_004297622.1|/0.0/PREDICTED: Fragaria vesca subsp. vesca IAA-amino acid hydrolase ILR1-like 1-like (LOC101295221), mRNA	sp|Q8S9S4|ILL1_ORYSJ/1e-130/IAA-amino acid hydrolase ILR1-like 1 OS=Oryza sativa subsp. japonica GN=ILL1 PE=2 SV=1	fve:101295221/0.0/IAA-amino acid hydrolase ILR1-like 1; K14664 IAA-amino acid hydrolase [EC:3.5.1.-]	PAB0873/4e-96/---	PTHR11014/3.9E-201/--	biological_process:GO:0008152//metabolic process;molecular_function:GO:0016787//hydrolase activity;
CL5958.Contig1_All	1487	-1.03147	6.81e-22	Down	gi|470129706|ref|XP_004300750.1|/0/PREDICTED: transcription factor TCP9-like [Fragaria vesca subsp. vesca]	gi|470129705|ref|XM_004300702.1|/0.0/PREDICTED: Fragaria vesca subsp. vesca transcription factor TCP9-like (LOC101296009), mRNA	sp|O64647|TCP9_ARATH/2e-66/Transcription factor TCP9 OS=Arabidopsis thaliana GN=TCP9 PE=2 SV=1	brp:103847150/5e-23/transcription factor TCP21-like; K16221 transcription factor TCP21 (protein CCA1 HIKING EXPEDITION)	NA	PF03634/4.9E-34/TCP family transcription factor	NA
Unigene5915_All	2170	1.28398	4.45e-15	Up	gi|764646115|ref|XP_011457529.1|/1.62416e-112/PREDICTED: ethylene-responsive transcription factor ERF113 [Fragaria vesca subsp. vesca]	gi|470149226|ref|XM_004310093.1|/0.0/PREDICTED: Fragaria vesca subsp. vesca ethylene-responsive transcription factor ERF114-like (LOC101303581), mRNA	sp|Q9LYU3|EF113_ARATH/3e-39/Ethylene-responsive transcription factor ERF113 OS=Arabidopsis thaliana GN=ERF113 PE=2 SV=1	sot:102587576/7e-24/Pti4; ethylene-responsive transcription factor 1-like; K09286 EREBP-like factor	NA	PF00847/9.6E-18/AP2 domain	NA
Unigene13367_All	1260	1.84391	0.00527736	Up	NA	NA	NA	NA	NA	NA	NA
Unigene4580_All	740	2.89678	6.04e-10	Up	gi|764646227|ref|XP_011457539.1|/4.64529e-78/PREDICTED: classical arabinogalactan protein 6-like [Fragaria vesca subsp. vesca]	NA	sp|Q84ZL0|FH5_ORYSJ/8e-07/Formin-like protein 5 OS=Oryza sativa subsp. japonica GN=FH5 PE=2 SV=2	thj:104818345/3e-06/glycine-rich RNA-binding protein 3, mitochondrial-like; K12741 heterogeneous nuclear ribonucleoprotein A1/A3	NA	NA	NA
CL4352.Contig4_All	1666	-1.20327	1.28e-10	Down	gi|764620794|ref|XP_011468551.1|/0/PREDICTED: LOW QUALITY PROTEIN: probable F-box protein At1g60180 [Fragaria vesca subsp. vesca]	gi|470113827|ref|XM_004293073.1|/1e-16/PREDICTED: Fragaria vesca subsp. vesca F-box protein At2g27310-like (LOC101301650), mRNA	sp|Q9SIH5|FB322_ARATH/3e-86/Probable F-box protein At1g60180 OS=Arabidopsis thaliana GN=At2g36090 PE=2 SV=1	dosa:Os04t0498700-01/8e-15/Os04g0498700; Haem peroxidase family protein.; K00430 peroxidase [EC:1.11.1.7]	Cgl1939/7e-11/---	PF12937/2.5E-6/F-box-like	NA
CL3470.Contig6_All	2475	1.1776	0.000491741	Up	gi|764614286|ref|XP_011467856.1|/0/PREDICTED: uncharacterized protein LOC101308302 [Fragaria vesca subsp. vesca] &gt;gi|764614290|ref|XP_011467857.1| PREDICTED: uncharacterized protein LOC101308302 [Fragaria vesca subsp. vesca] &gt;gi|764614294|ref|XP_011467858.1| PREDICTED: uncharacterized protein LOC101308302 [Fragaria vesca subsp. vesca] &gt;gi|764614297|ref|XP_011467859.1| PREDICTED: uncharac…	gi|470136844|ref|XR_185044.1|/1e-161/PREDICTED: Fragaria vesca subsp. vesca uncharacterized LOC101308302, transcript variant 2 (LOC101308302), misc_RNA	sp|Q9LMR4|FBK4_ARATH/4e-06/Putative F-box/kelch-repeat protein At1g15680 OS=Arabidopsis thaliana GN=At1g15680 PE=4 SV=1	fve:101308302/0.0/uncharacterized LOC101308302; K18999 RNA polymerase II C-terminal domain phosphatase-like 3/4 [EC:3.1.3.16]	NA	PF12937/1.9E-6/F-box-like	NA
CL608.Contig3_All	2543	1.41475	3.8e-05	Up	gi|470148349|ref|XP_004309730.1|/0/PREDICTED: filament-like plant protein [Fragaria vesca subsp. vesca] &gt;gi|764642759|ref|XP_011471019.1| PREDICTED: filament-like plant protein [Fragaria vesca subsp. vesca] &gt;gi|764642767|ref|XP_011471020.1| PREDICTED: filament-like plant protein [Fragaria vesca subsp. vesca] &gt;gi|764642773|ref|XP_011471021.1| PREDICTED: filament-like plant protein [Fragar…	gi|470148348|ref|XM_004309682.1|/0.0/PREDICTED: Fragaria vesca subsp. vesca filament-like plant protein-like (LOC101297689), mRNA	sp|Q9MA92|FPP3_ARATH/8e-118/Filament-like plant protein 3 OS=Arabidopsis thaliana GN=FPP3 PE=2 SV=2	sot:102585808/7e-29/filament-like plant protein 7; K10352 myosin heavy chain	MJ1322/2e-12/---	PF05911/2.5E-65/Plant protein of unknown function (DUF869)	NA
CL7916.Contig1_All	1254	1.42573	3.47e-18	Up	gi|470123668|ref|XP_004297844.1|/7.9124e-161/PREDICTED: uncharacterized protein LOC101301288 [Fragaria vesca subsp. vesca]	gi|470123667|ref|XM_004297796.1|/0.0/PREDICTED: Fragaria vesca subsp. vesca uncharacterized LOC101301288 (LOC101301288), mRNA	sp|Q9M4U5|HDT2_MAIZE/8e-06/Histone deacetylase HDT2 OS=Zea mays GN=HDT2 PE=1 SV=1	NA	NA	NA	NA
Unigene8316_All	820	1.31456	0.000919612	Up	gi|764551876|ref|XP_011460208.1|/1.38354e-100/PREDICTED: BRASSINOSTEROID INSENSITIVE 1-associated receptor kinase 1-like [Fragaria vesca subsp. vesca]	NA	sp|Q94F62|BAK1_ARATH/3e-42/BRASSINOSTEROID INSENSITIVE 1-associated receptor kinase 1 OS=Arabidopsis thaliana GN=BAK1 PE=1 SV=2	dosa:Os08t0174700-01/7e-45/Os08g0174700; Similar to SERK1 (Fragment).; K13418 somatic embryogenesis receptor kinase 1 [EC:2.7.10.1 2.7.11.1]	NA	PTHR24420/5.6E-50/--	biological_process:GO:0009987//cellular process;
Unigene7897_All	317	2.21084	0.00455578	Up	NA	gi|470142341|ref|XM_004306822.1|/8e-30/PREDICTED: Fragaria vesca subsp. vesca probable pre-mRNA-splicing factor ATP-dependent RNA helicase-like (LOC101302977), mRNA	NA	NA	NA	NA	NA
Unigene6955_All	819	4.67235	9.2e-20	Up	gi|470129740|ref|XP_004300766.1|/3.64068e-77/PREDICTED: elicitor-responsive protein 3-like [Fragaria vesca subsp. vesca]	gi|470129739|ref|XM_004300718.1|/0.0/PREDICTED: Fragaria vesca subsp. vesca elicitor-responsive protein 3-like (LOC101302079), mRNA	sp|Q0JBH9|ERG3_ORYSJ/6e-41/Elicitor-responsive protein 3 OS=Oryza sativa subsp. japonica GN=ERG3 PE=2 SV=1	sita:101760718/2e-21/triosephosphate isomerase, cytosolic; K01803 triosephosphate isomerase (TIM) [EC:5.3.1.1]	YOR086c/2e-08/---	PS50004/14.763/C2 domain profile.	NA
Unigene480_All	1020	-1.77414	0.000179491	Down	gi|470123349|ref|XP_004297689.1|/3.33831e-55/PREDICTED: CLAVATA3/ESR (CLE)-related protein 25 [Fragaria vesca subsp. vesca]	gi|470123348|ref|XM_004297641.1|/0.0/PREDICTED: Fragaria vesca subsp. vesca CLAVATA3/ESR (CLE)-related protein 25-like (LOC101300904), mRNA	sp|Q8LFL4|CLE25_ARATH/7e-08/CLAVATA3/ESR (CLE)-related protein 25 OS=Arabidopsis thaliana GN=CLE25 PE=2 SV=1	NA	NA	NA	NA
CL8608.Contig1_All	1419	3.14891	3.7e-05	Up	gi|764620022|ref|XP_011468437.1|/3.33432e-49/PREDICTED: uncharacterized protein LOC105352611 [Fragaria vesca subsp. vesca]	gi|470104335|ref|XM_004288515.1|/0.0/PREDICTED: Fragaria vesca subsp. vesca uncharacterized LOC101313740 (LOC101313740), mRNA	NA	mtr:MTR_8g039210/9e-06/replication factor-A carboxy-terminal domain protein; K07466 replication factor A1	NA	PTHR10492:SF17/3.4E-12/--	NA
Unigene22715_All	1673	-4.05085	6.48e-29	Down	gi|470137937|ref|XP_004304716.1|/0/PREDICTED: anthocyanidin 3-O-glucoside 2&apos;&apos;-O-glucosyltransferase-like [Fragaria vesca subsp. vesca] &gt;gi|764595607|ref|XP_011465894.1| PREDICTED: anthocyanidin 3-O-glucoside 2&apos;&apos;-O-glucosyltransferase-like [Fragaria vesca subsp. vesca]	gi|470137936|ref|XM_004304668.1|/0.0/PREDICTED: Fragaria vesca subsp. vesca UDP-glycosyltransferase 79B6-like (LOC101299887), mRNA	sp|Q53UH5|DUSKY_IPOPU/4e-159/Anthocyanidin 3-O-glucoside 2''-O-glucosyltransferase OS=Ipomoea purpurea GN=3GGT PE=2 SV=1	cam:101506130/2e-150/UGT79B25; anthocyanidin 3-O-glucoside 2''-O-glucosyltransferase; K17193 anthocyanidin 3-O-glucoside 2'''-O-xylosyltransferase [EC:2.4.2.51]	NA	PS00375/-/UDP-glycosyltransferases signature.	biological_process:GO:0008152//metabolic process;molecular_function:GO:0016758//transferase activity, transferring hexosyl groups;
CL3048.Contig2_All	687	-1.05095	2.93e-09	Down	gi|970027197|ref|XP_015074904.1|/1.08308e-14/PREDICTED: glycine-rich RNA-binding protein blt801-like [Solanum pennellii]	NA	sp|P21997|SSGP_VOLCA/4e-07/Sulfated surface glycoprotein 185 OS=Volvox carteri PE=1 SV=1	sind:105157953/2e-06/formin-like protein 20; K02184 formin 2	NA	NA	NA
Unigene20646_All	564	2.61383	8.79e-10	Up	NA	NA	NA	NA	NA	NA	NA
CL1093.Contig2_All	1578	-2.02316	4.39e-07	Down	gi|470136299|ref|XP_004303932.1|/0/PREDICTED: 7-deoxyloganetin glucosyltransferase-like [Fragaria vesca subsp. vesca]	gi|470136298|ref|XM_004303884.1|/0.0/PREDICTED: Fragaria vesca subsp. vesca UDP-glycosyltransferase 85A1-like (LOC101303049), mRNA	sp|Q9SK82|U85A1_ARATH/2e-162/UDP-glycosyltransferase 85A1 OS=Arabidopsis thaliana GN=UGT85A1 PE=2 SV=1	bdi:100843904/1e-90/cyanohydrin beta-glucosyltransferase-like; K13030 cyanohydrin beta-glucosyltransferase [EC:2.4.1.85]	NA	PS00375/-/UDP-glycosyltransferases signature.	NA
CL5784.Contig2_All	1362	2.09971	4.29e-09	Up	NA	gi|154183905|gb|EU024862.1|/1e-47/Fragaria vesca subsp. americana clone fosmid 52E09, complete sequence	NA	NA	NA	NA	NA
CL3843.Contig5_All	1373	2.27375	4.7e-37	Up	gi|470132863|ref|XP_004302294.1|/0/PREDICTED: galactinol synthase 2-like [Fragaria vesca subsp. vesca]	gi|470132862|ref|XM_004302246.1|/0.0/PREDICTED: Fragaria vesca subsp. vesca galactinol synthase 2-like (LOC101305769), mRNA	sp|C7G304|GOLS2_SOLLC/1e-149/Galactinol synthase 2 OS=Solanum lycopersicum GN=GOLS2 PE=2 SV=1	fve:101305769/0.0/galactinol synthase 2-like; K18819 inositol 3-alpha-galactosyltransferase [EC:2.4.1.123]	SMc04081/1e-13/---	PTHR11183:SF33/3.9E-188/--	molecular_function:GO:0016757//transferase activity, transferring glycosyl groups;
Unigene19973_All	3417	-1.14687	7.39e-84	Down	gi|470129488|ref|XP_004300649.1|/2.38421e-140/PREDICTED: 14-3-3 protein 7-like [Fragaria vesca subsp. vesca]	gi|470129487|ref|XM_004300601.1|/0.0/PREDICTED: Fragaria vesca subsp. vesca 14-3-3 protein 7-like (LOC101312352), mRNA	sp|P93212|14337_SOLLC/3e-109/14-3-3 protein 7 OS=Solanum lycopersicum GN=TFT7 PE=2 SV=2	fve:101312352/4e-141/14-3-3 protein 7-like; K06630 14-3-3 protein epsilon	SPAC8E11.02c/5e-90/---	PF12697/1.3E-18/Alpha/beta hydrolase family	molecular_function:GO:0019904//protein domain specific binding;
CL1314.Contig4_All	1357	1.79218	5.86e-08	Up	gi|470142964|ref|XP_004307159.1|/0/PREDICTED: probable mannitol dehydrogenase [Fragaria vesca subsp. vesca]	gi|470142963|ref|XM_004307111.1|/0.0/PREDICTED: Fragaria vesca subsp. vesca probable mannitol dehydrogenase-like (LOC101297378), mRNA	sp|Q9ZRF1|MTDH_FRAAN/0.0/Probable mannitol dehydrogenase OS=Fragaria ananassa GN=CAD PE=1 SV=1	fve:101297378/0.0/probable mannitol dehydrogenase; K00083 cinnamyl-alcohol dehydrogenase [EC:1.1.1.195]	SMc00680/8e-98/---	PF08240/1.4E-28/Alcohol dehydrogenase GroES-like domain	biological_process:GO:0055114//oxidation-reduction process;molecular_function:GO:0008270//zinc ion binding;GO:0046029//mannitol dehydrogenase activity;
CL953.Contig12_All	4856	3.33152	1.38e-19	Up	gi|470125128|ref|XP_004298558.1|/0/PREDICTED: ABC transporter C family member 8-like [Fragaria vesca subsp. vesca]	gi|470125127|ref|XM_004298510.1|/0.0/PREDICTED: Fragaria vesca subsp. vesca ABC transporter C family member 8-like (LOC101297639), mRNA	sp|Q8LGU1|AB8C_ARATH/0.0/ABC transporter C family member 8 OS=Arabidopsis thaliana GN=ABCC8 PE=2 SV=3	vra:106773074/0.0/ABC transporter C family member 8-like; K05665 ATP-binding cassette, subfamily C (CFTR/MRP), member 1	SPAC3F10.11c/0.0/---	PS00211/-/ABC transporters family signature.	biological_process:GO:0055085//transmembrane transport;cellular_component:GO:0016021//integral component of membrane;molecular_function:GO:0005524//ATP binding;GO:0042626//ATPase activity, coupled to transmembrane movement of substances;
CL4615.Contig1_All	1135	1.21584	7.31e-05	Up	gi|470134433|ref|XP_004303057.1|/2.54257e-123/PREDICTED: peptidyl-prolyl cis-trans isomerase FKBP16-4, chloroplastic [Fragaria vesca subsp. vesca]	gi|470134432|ref|XM_004303009.1|/0.0/PREDICTED: Fragaria vesca subsp. vesca peptidyl-prolyl cis-trans isomerase FKBP16-4, chloroplastic-like (LOC101315065), mRNA	sp|Q9SR70|FK164_ARATH/2e-82/Peptidyl-prolyl cis-trans isomerase FKBP16-4, chloroplastic OS=Arabidopsis thaliana GN=FKBP16-4 PE=1 SV=1	csv:101206539/1e-23/peptidyl-prolyl cis-trans isomerase FKBP18, chloroplastic; K01802 peptidylprolyl isomerase [EC:5.2.1.8]	slr1761/7e-19/---	PTHR10516/6.9E-72/--	biological_process:GO:0006457//protein folding;GO:0000413//protein peptidyl-prolyl isomerization;cellular_component:GO:0009535//chloroplast thylakoid membrane;molecular_function:GO:0003755//peptidyl-prolyl cis-trans isomerase activity;
CL8941.Contig1_All	2474	-1.06922	2.8e-15	Down	gi|470123075|ref|XP_004297562.1|/0/PREDICTED: protein NUCLEAR FUSION DEFECTIVE 4-like [Fragaria vesca subsp. vesca]	gi|470123074|ref|XM_004297514.1|/0.0/PREDICTED: Fragaria vesca subsp. vesca uncharacterized LOC101308077 (LOC101308077), mRNA	NA	aly:ARALYDRAFT_321151/1e-77/hypothetical protein; K14794 ribosomal RNA-processing protein 12	AF0367/3e-09/---	PTHR21576/8.8E-187/--	cellular_component:GO:0016021//integral component of membrane;
CL2196.Contig1_All	2179	3.01139	1.2e-26	Up	gi|470110965|ref|XP_004291727.1|/0/PREDICTED: F-box protein At2g32560 isoform X1 [Fragaria vesca subsp. vesca] &gt;gi|764545022|ref|XP_011459458.1| PREDICTED: F-box protein At2g32560 isoform X1 [Fragaria vesca subsp. vesca]	gi|470110964|ref|XM_004291679.1|/0.0/PREDICTED: Fragaria vesca subsp. vesca F-box protein At2g32560-like (LOC101301937), mRNA	sp|Q8RY82|FB121_ARATH/1e-123/F-box protein At2g32560 OS=Arabidopsis thaliana GN=At2g32560 PE=2 SV=1	thj:104800457/2e-88/hydroxymethylglutaryl-CoA lyase, mitochondrial; K01640 hydroxymethylglutaryl-CoA lyase [EC:4.1.3.4]	NA	SM00256/2.0E-4/A Receptor for Ubiquitination Targets	NA
Unigene10991_All	1046	4.3733	1.02e-270	Up	gi|470139740|ref|XP_004305604.1|/2.7413e-145/PREDICTED: fasciclin-like arabinogalactan protein 14 [Fragaria vesca subsp. vesca]	gi|470139739|ref|XM_004305556.1|/0.0/PREDICTED: Fragaria vesca subsp. vesca fasciclin-like arabinogalactan protein 14-like (LOC101308600), mRNA	sp|Q9LTW9|FLA14_ARATH/3e-40/Fasciclin-like arabinogalactan protein 14 OS=Arabidopsis thaliana GN=FLA14 PE=2 SV=1	mus:103981635/1e-16/serine/threonine-protein phosphatase 2A 65 kDa regulatory subunit A beta isoform-like; K03456 serine/threonine-protein phosphatase 2A regulatory subunit A	NA	PTHR32382/4.8E-47/--	NA
CL3171.Contig4_All	2372	1.44189	0.000978394	Up	gi|764530304|ref|XP_011458276.1|/0/PREDICTED: probable DNA helicase MCM9 [Fragaria vesca subsp. vesca]	gi|470112405|ref|XM_004292378.1|/0.0/PREDICTED: Fragaria vesca subsp. vesca DNA helicase MCM9-like (LOC101303192), mRNA	sp|F4IFF3|MCM9_ARATH/0.0/Probable DNA helicase MCM9 OS=Arabidopsis thaliana GN=MCM9 PE=3 SV=1	fve:101303192/0.0/probable DNA helicase MCM9; K10738 DNA helicase MCM9 [EC:3.6.4.12]	SSO0774/2e-79/---	PR01657/9.2E-26/Mini-chromosome maintenance (MCM) protein family signature	biological_process:GO:0006260//DNA replication;molecular_function:GO:0003677//DNA binding;GO:0005524//ATP binding;
CL7129.Contig1_All	514	4.9932	4.03e-44	Up	gi|470104097|ref|XP_004288451.1|/1.27096e-24/PREDICTED: inhibitor of trypsin and hageman factor-like [Fragaria vesca subsp. vesca]	gi|470104094|ref|XM_004288402.1|/0.0/PREDICTED: Fragaria vesca subsp. vesca inhibitor of trypsin and hageman factor-like (LOC101302587), mRNA	sp|P19873|ITH5_CUCMA/2e-17/Inhibitor of trypsin and hageman factor OS=Cucurbita maxima PE=1 SV=1	NA	NA	NA	biological_process:GO:0009611//response to wounding;GO:0010951//negative regulation of endopeptidase activity;molecular_function:GO:0004867//serine-type endopeptidase inhibitor activity;
CL3987.Contig1_All	2118	-1.53583	6.75e-11	Down	gi|764618335|ref|XP_011468237.1|/0/PREDICTED: vegetative cell wall protein gp1-like [Fragaria vesca subsp. vesca]	NA	sp|Q9FPQ6|GP1_CHLRE/5e-50/Vegetative cell wall protein gp1 OS=Chlamydomonas reinhardtii GN=GP1 PE=1 SV=1	aip:107619883/3e-53/formin-like protein 20; K02184 formin 2	Rv3876/5e-20/---	PR01217/1.0E-9/Proline rich extensin signature	NA
Unigene22461_All	2937	1.22812	4.57e-05	Up	gi|764540985|ref|XP_011459106.1|/0/PREDICTED: armadillo repeat-containing kinesin-like protein 1 [Fragaria vesca subsp. vesca]	gi|470113454|ref|XM_004292891.1|/0.0/PREDICTED: Fragaria vesca subsp. vesca uncharacterized LOC101306598 (LOC101306598), mRNA	sp|Q0DV28|ARK1_ORYSJ/7e-29/Armadillo repeat-containing kinesin-like protein 1 OS=Oryza sativa subsp. japonica GN=Os03g0152900 PE=2 SV=2	fve:101306598/0.0/armadillo repeat-containing kinesin-like protein 1; K10401 kinesin family member 18/19	SPAC1834.07/1e-24/---	SM00129/1.7E-21/Kinesin motor, catalytic domain. ATPase.	biological_process:GO:0007018//microtubule-based movement;cellular_component:GO:0005874//microtubule;molecular_function:GO:0005524//ATP binding;GO:0003777//microtubule motor activity;GO:0008017//microtubule binding;
Unigene8608_All	1019	-1.52816	4.71e-11	Down	gi|470109256|ref|XP_004290916.1|/8.9017e-109/PREDICTED: floral homeotic protein PMADS 2-like [Fragaria vesca subsp. vesca]	gi|470109255|ref|XM_004290868.1|/0.0/PREDICTED: Fragaria vesca subsp. vesca floral homeotic protein PMADS 2-like (LOC101296163), mRNA	sp|Q07474|MADS2_PETHY/2e-69/Floral homeotic protein PMADS 2 OS=Petunia hybrida GN=PMADS2 PE=2 SV=1	vvi:100232978/2e-67/MADS9, PI, PISTILLATA; PISTILLATA-like MADS-box protein-like; K09264 MADS-box transcription factor, plant	YPL089c/7e-10/---	PF00319/2.0E-24/SRF-type transcription factor (DNA-binding and dimerisation domain)	NA
CL8767.Contig2_All	2932	-1.11685	6.34e-16	Down	gi|470110110|ref|XP_004291330.1|/0/PREDICTED: calcium-dependent protein kinase 29 isoform X1 [Fragaria vesca subsp. vesca]	gi|470110109|ref|XM_004291282.1|/0.0/PREDICTED: Fragaria vesca subsp. vesca calcium-dependent protein kinase 29-like (LOC101297901), mRNA	sp|Q8RWL2|CDPKT_ARATH/0.0/Calcium-dependent protein kinase 29 OS=Arabidopsis thaliana GN=CPK29 PE=2 SV=2	fve:101297901/0.0/calcium-dependent protein kinase 29; K13412 calcium-dependent protein kinase [EC:2.7.11.1]	SPAC14C4.03/2e-34/---	SM00054/1.5E-4/EF-hand, calcium binding motif	biological_process:GO:0006468//protein phosphorylation;cellular_component:GO:0005634//nucleus;GO:0005886//plasma membrane;GO:0005737//cytoplasm;molecular_function:GO:0004674//protein serine/threonine kinase activity;GO:0005524//ATP binding;GO:0005509//calcium ion binding;
CL3921.Contig1_All	1492	1.09534	2.66e-11	Up	gi|764646115|ref|XP_011457529.1|/2.49572e-135/PREDICTED: ethylene-responsive transcription factor ERF113 [Fragaria vesca subsp. vesca]	gi|470149226|ref|XM_004310093.1|/0.0/PREDICTED: Fragaria vesca subsp. vesca ethylene-responsive transcription factor ERF114-like (LOC101303581), mRNA	sp|Q9LY29|EF115_ARATH/7e-45/Ethylene-responsive transcription factor ERF115 OS=Arabidopsis thaliana GN=ERF115 PE=1 SV=1	sot:102587576/1e-26/Pti4; ethylene-responsive transcription factor 1-like; K09286 EREBP-like factor	NA	PF00847/1.7E-17/AP2 domain	NA
CL3425.Contig2_All	1701	1.7481	3.86e-16	Up	gi|470126738|ref|XP_004299340.1|/0/PREDICTED: NAC domain-containing protein 100 [Fragaria vesca subsp. vesca]	gi|470126737|ref|XM_004299292.1|/0.0/PREDICTED: Fragaria vesca subsp. vesca NAC domain-containing protein 100-like, transcript variant 2 (LOC101299002), mRNA	sp|Q9FLJ2|NC100_ARATH/7e-112/NAC domain-containing protein 100 OS=Arabidopsis thaliana GN=NAC100 PE=2 SV=1	bna:106383523/5e-22/NAC domain-containing protein 89-like; K12581 CCR4-NOT transcription complex subunit 7/8	NA	PTHR31744/2.9E-134/--	biological_process:GO:0006355//regulation of transcription, DNA-templated;cellular_component:GO:0005634//nucleus;molecular_function:GO:0003677//DNA binding;
Unigene15035_All	1216	1.02407	0.000303678	Up	gi|694316945|ref|XP_009336061.1|/5.17038e-08/PREDICTED: glucose-1-phosphate adenylyltransferase large subunit, chloroplastic/amyloplastic [Pyrus x bretschneideri]	gi|470118165|ref|XR_184337.1|/0.0/PREDICTED: Fragaria vesca subsp. vesca uncharacterized LOC101301089 (LOC101301089), misc_RNA	sp|P55233|GLGL1_BETVU/1e-06/Glucose-1-phosphate adenylyltransferase large subunit, chloroplastic/amyloplastic OS=Beta vulgaris GN=AGPS1 PE=2 SV=1	pxb:103928707/9e-09/glucose-1-phosphate adenylyltransferase large subunit, chloroplastic/amyloplastic; K00975 glucose-1-phosphate adenylyltransferase [EC:2.7.7.27]	NA	NA	NA
CL5947.Contig2_All	2485	-1.1315	0.00109362	Down	gi|764567720|ref|XP_004295190.2|/0/PREDICTED: uncharacterized protein LOC101293760 [Fragaria vesca subsp. vesca]	gi|470120473|ref|XM_004296279.1|/0.0/PREDICTED: Fragaria vesca subsp. vesca cellulose synthase-like protein E1-like (LOC101294350), mRNA	sp|Q8VZK9|CSLE1_ARATH/0.0/Cellulose synthase-like protein E1 OS=Arabidopsis thaliana GN=CSLE1 PE=2 SV=1	cam:101500798/2e-96/cellulose synthase A catalytic subunit 7 [UDP-forming]-like; K10999 cellulose synthase A [EC:2.4.1.12]	alr3757/2e-13/---	PF03552/2.7E-16/Cellulose synthase	biological_process:GO:0030244//cellulose biosynthetic process;GO:0071555//cell wall organization;cellular_component:GO:0016021//integral component of membrane;molecular_function:GO:0016760//cellulose synthase (UDP-forming) activity;
Unigene20531_All	948	2.02931	1.82e-35	Up	gi|470101781|ref|XP_004287347.1|/1.43418e-110/PREDICTED: uncharacterized protein LOC101304028 [Fragaria vesca subsp. vesca]	gi|470101780|ref|XM_004287299.1|/0.0/PREDICTED: Fragaria vesca subsp. vesca metallothiol transferase FosB-like, transcript variant 2 (LOC101304028), mRNA	NA	mus:103986044/4e-62/nucleobase-ascorbate transporter 3-like; K14611 solute carrier family 23 (nucleobase transporter), member 1/2	all7236/5e-08/---	PTHR10374:SF1/3.2E-85/--	NA
CL27.Contig1_All	1033	1.66601	0.00392357	Up	gi|697113273|ref|XP_009610517.1|/1.38415e-52/PREDICTED: UDP-N-acetylglucosamine transferase subunit ALG13 homolog isoform X1 [Nicotiana tomentosiformis] &gt;gi|697113275|ref|XP_009610518.1| PREDICTED: UDP-N-acetylglucosamine transferase subunit ALG13 homolog isoform X1 [Nicotiana tomentosiformis] &gt;gi|697113277|ref|XP_009610519.1| PREDICTED: UDP-N-acetylglucosamine transferase subunit ALG13 hom…	gi|470133174|ref|XM_004302400.1|/0.0/PREDICTED: Fragaria vesca subsp. vesca UDP-N-acetylglucosamine transferase subunit ALG13 homolog (LOC101301985), mRNA	NA	sot:102596745/1e-52/UDP-N-acetylglucosamine transferase subunit ALG13 homolog; K07432 beta-1,4-N-acetylglucosaminyltransferase [EC:2.4.1.141]	SPAC56E4.02c/9e-14/---	PTHR12867/1.6E-32/--	NA
CL6498.Contig1_All	2396	2.24118	0.00135314	Up	gi|470118214|ref|XP_004295229.1|/0/PREDICTED: DNA topoisomerase 6 subunit B [Fragaria vesca subsp. vesca]	gi|470118213|ref|XM_004295181.1|/0.0/PREDICTED: Fragaria vesca subsp. vesca DNA topoisomerase 6 subunit B-like (LOC101307871), mRNA	sp|Q9C5V6|TOP6B_ARATH/0.0/DNA topoisomerase 6 subunit B OS=Arabidopsis thaliana GN=TOP6B PE=1 SV=1	NA	APE0706/8e-73/---	PF09239/1.2E-51/Topoisomerase VI B subunit, transducer	biological_process:GO:0000902//cell morphogenesis;GO:0009741//response to brassinosteroid;GO:0042023//DNA endoreduplication;GO:0007389//pattern specification process;GO:0010026//trichome differentiation;GO:0006265//DNA topological change;cellular_component:GO:0005634//nucleus;GO:0009330//DNA topoisomerase complex (ATP-hydrolyzing);molecular_function:GO:0003677//DNA binding;GO:0005524//ATP binding…
CL9329.Contig1_All	1149	1.52795	1.01e-13	Up	gi|764588645|ref|XP_004300005.2|/0/PREDICTED: glucuronoxylan 4-O-methyltransferase 1 [Fragaria vesca subsp. vesca]	gi|470128130|ref|XM_004299957.1|/0.0/PREDICTED: Fragaria vesca subsp. vesca glucuronoxylan 4-O-methyltransferase 1-like (LOC101307210), mRNA	sp|Q6NMK1|GXM1_ARATH/2e-108/Glucuronoxylan 4-O-methyltransferase 1 OS=Arabidopsis thaliana GN=GXM1 PE=1 SV=1	fve:101307210/0.0/glucuronoxylan 4-O-methyltransferase 1; K18801 glucuronoxylan 4-O-methyltransferase [EC:2.1.1.112]	NA	PTHR31444:SF2/1.1E-148/--	NA
Unigene284_All	2276	-1.12455	1.31e-05	Down	gi|764528039|ref|XP_011458086.1|/0/PREDICTED: MATE efflux family protein 3, chloroplastic isoform X1 [Fragaria vesca subsp. vesca]	gi|470107426|ref|XM_004289999.1|/0.0/PREDICTED: Fragaria vesca subsp. vesca MATE efflux family protein 3, chloroplastic-like (LOC101296156), mRNA	sp|Q9SVE7|MATE3_ARATH/3e-179/MATE efflux family protein 3, chloroplastic OS=Arabidopsis thaliana GN=DTX45 PE=2 SV=2	smo:SELMODRAFT_417928/2e-94/hypothetical protein; K20456 oxysterol-binding protein 1	Rv2836c/9e-36/---	PF01554/3.1E-10/MatE	NA
CL2184.Contig2_All	1545	1.71374	0.000663116	Up	gi|764553229|ref|XP_011460382.1|/0/PREDICTED: protein SRG1-like [Fragaria vesca subsp. vesca]	gi|470118604|ref|XM_004295367.1|/0.0/PREDICTED: Fragaria vesca subsp. vesca protein SRG1-like (LOC101299169), mRNA	sp|Q39224|SRG1_ARATH/2e-101/Protein SRG1 OS=Arabidopsis thaliana GN=SRG1 PE=2 SV=1	smo:SELMODRAFT_452899/3e-46/2-oxoglutarate-Iron(II)-dependent oxygenase; K06892 feruloyl-CoA ortho-hydroxylase [EC:1.14.11.-]	PA0147/1e-18/---	PF14226/9.8E-26/non-haem dioxygenase in morphine synthesis N-terminal	molecular_function:GO:0051213//dioxygenase activity;
Unigene13142_All	1915	-2.74911	5.89e-11	Down	gi|470124736|ref|XP_004298365.1|/0/PREDICTED: cytochrome P450 78A5 [Fragaria vesca subsp. vesca]	gi|470124735|ref|XM_004298317.1|/0.0/PREDICTED: Fragaria vesca subsp. vesca cytochrome P450 78A4-like (LOC101309249), mRNA	sp|Q9LMX7|C78A5_ARATH/0.0/Cytochrome P450 78A5 OS=Arabidopsis thaliana GN=CYP78A5 PE=2 SV=1	mdm:103402809/0.0/cytochrome P450 78A5-like; K00517	AGc2890/1e-26/---	PR00385/2.7E-8/P450 superfamily signature	biological_process:GO:0040009//regulation of growth rate;GO:0048437//floral organ development;GO:0055114//oxidation-reduction process;GO:0046622//positive regulation of organ growth;GO:0008284//positive regulation of cell proliferation;cellular_component:GO:0005783//endoplasmic reticulum;GO:0016021//integral component of membrane;molecular_function:GO:0020037//heme binding;GO:0005506//iron ion bi…
CL4031.Contig3_All	3757	-1.30096	0.00295049	Down	gi|470115848|ref|XP_004294103.1|/0/PREDICTED: UBP1-associated protein 2C [Fragaria vesca subsp. vesca]	gi|470115847|ref|XM_004294055.1|/0.0/PREDICTED: Fragaria vesca subsp. vesca polyadenylate-binding protein 2-like (LOC101295022), mRNA	sp|Q9LKA4|UBA2C_ARATH/6e-129/UBP1-associated protein 2C OS=Arabidopsis thaliana GN=UBA2C PE=2 SV=1	fve:101295022/0.0/UBP1-associated protein 2C; K12741 heterogeneous nuclear ribonucleoprotein A1/A3	SPAC140.02/1e-18/---	SM00360/1.9E-13/RNA recognition motif	biological_process:GO:0009693//ethylene biosynthetic process;GO:0006952//defense response;GO:0010150//leaf senescence;GO:0008219//cell death;cellular_component:GO:0005730//nucleolus;molecular_function:GO:0000166//nucleotide binding;GO:0003676//nucleic acid binding;
CL1232.Contig4_All	1489	-1.44886	2.68e-09	Down	gi|470132020|ref|XP_004301885.1|/2.4455e-90/PREDICTED: anthocyanidin 3-O-glucosyltransferase 5-like [Fragaria vesca subsp. vesca]	gi|470132019|ref|XM_004301837.1|/0.0/PREDICTED: Fragaria vesca subsp. vesca anthocyanidin 3-O-glucosyltransferase 5-like (LOC101311585), mRNA	sp|Q94A84|U72E1_ARATH/1e-37/UDP-glycosyltransferase 72E1 OS=Arabidopsis thaliana GN=UGT72E1 PE=1 SV=1	fve:101311874/1e-61/anthocyanidin 3-O-glucosyltransferase 5-like; K12356 coniferyl-alcohol glucosyltransferase [EC:2.4.1.111]	NA	PF00201/3.9E-15/UDP-glucoronosyl and UDP-glucosyl transferase	biological_process:GO:0009813//flavonoid biosynthetic process;GO:0052696//flavonoid glucuronidation;cellular_component:GO:0043231//intracellular membrane-bounded organelle;molecular_function:GO:0080043//quercetin 3-O-glucosyltransferase activity;GO:0080044//quercetin 7-O-glucosyltransferase activity;
CL8842.Contig3_All	740	-3.31451	1.09e-05	Down	gi|470102171|ref|XP_004287531.1|/2.66234e-41/PREDICTED: inorganic pyrophosphatase 3 [Fragaria vesca subsp. vesca]	gi|470102170|ref|XM_004287483.1|/0.0/PREDICTED: Fragaria vesca subsp. vesca inorganic pyrophosphatase 3-like (LOC101313834), mRNA	sp|Q67YC0|PPSP1_ARATH/4e-21/Inorganic pyrophosphatase 1 OS=Arabidopsis thaliana GN=PS2 PE=1 SV=1	fve:101313834/5e-42/inorganic pyrophosphatase 3; K13248 pyridoxal phosphate phosphatase PHOSPHO2 [EC:3.1.3.74]	NA	PTHR20889/7.5E-26/--	biological_process:GO:0016311//dephosphorylation;molecular_function:GO:0016791//phosphatase activity;
CL4302.Contig4_All	1011	-3.02736	1.64e-05	Down	gi|470135135|ref|XP_004303379.1|/1.0995e-135/PREDICTED: D-lactate dehydrogenase [cytochrome], mitochondrial [Fragaria vesca subsp. vesca]	gi|470135134|ref|XM_004303331.1|/0.0/PREDICTED: Fragaria vesca subsp. vesca D-lactate dehydrogenase [cytochrome], mitochondrial-like (LOC101296979), mRNA	sp|Q94AX4|DLD_ARATH/7e-122/D-lactate dehydrogenase [cytochrome], mitochondrial OS=Arabidopsis thaliana GN=DLD PE=1 SV=1	fve:101296979/2e-136/D-lactate dehydrogenase [cytochrome], mitochondrial; K00102 D-lactate dehydrogenase (cytochrome) [EC:1.1.2.4]	RSc2664/4e-55/---	PTHR11748:SF43/4.3E-121/--	biological_process:GO:0055114//oxidation-reduction process;molecular_function:GO:0016614//oxidoreductase activity, acting on CH-OH group of donors;GO:0050660//flavin adenine dinucleotide binding;
Unigene22849_All	1029	1.83443	0.0015953	Up	gi|694435794|ref|XP_009345039.1|/4.517e-68/PREDICTED: uncharacterized protein LOC103936884 [Pyrus x bretschneideri]	gi|470143829|ref|XM_004307522.1|/1e-135/PREDICTED: Fragaria vesca subsp. vesca uncharacterized LOC101305796 (LOC101305796), mRNA	NA	NA	NA	NA	NA
Unigene1022_All	929	-1.08154	0.000336802	Down	gi|764624079|ref|XP_004308302.2|/6.28556e-111/PREDICTED: ethylene-responsive transcription factor ERF023 [Fragaria vesca subsp. vesca]	gi|470145345|ref|XM_004308254.1|/0.0/PREDICTED: Fragaria vesca subsp. vesca ethylene-responsive transcription factor ERF023-like (LOC101292165), mRNA	sp|Q1ECI2|ERF23_ARATH/5e-52/Ethylene-responsive transcription factor ERF023 OS=Arabidopsis thaliana GN=ERF023 PE=2 SV=1	fve:101292165/1e-111/ethylene-responsive transcription factor ERF023; K09286 EREBP-like factor	NA	SM00380/8.3E-35/DNA-binding domain in plant proteins such as APETALA2 and EREBPs	biological_process:GO:0006351//transcription, DNA-templated;
CL1923.Contig4_All	1436	-3.38862	2.27e-20	Down	gi|470138900|ref|XP_004305191.1|/0/PREDICTED: protein SRG1-like [Fragaria vesca subsp. vesca]	gi|470138899|ref|XM_004305143.1|/0.0/PREDICTED: Fragaria vesca subsp. vesca protein SRG1-like (LOC101310920), mRNA	sp|Q39224|SRG1_ARATH/2e-67/Protein SRG1 OS=Arabidopsis thaliana GN=SRG1 PE=2 SV=1	atr:18424242/1e-54/leucoanthocyanidin dioxygenase; K05277 leucoanthocyanidin dioxygenase [EC:1.14.11.19]	PA0147/3e-31/---	PR00682/2.2E-5/Isopenicillin N synthase signature	biological_process:GO:0055114//oxidation-reduction process;molecular_function:GO:0046872//metal ion binding;GO:0016491//oxidoreductase activity;
CL1448.Contig4_All	989	2.24025	0.00403595	Up	gi|470103380|ref|XP_004288117.1|/2.56383e-75/PREDICTED: NAD(P)H-quinone oxidoreductase subunit O, chloroplastic [Fragaria vesca subsp. vesca]	gi|470103379|ref|XM_004288069.1|/1e-140/PREDICTED: Fragaria vesca subsp. vesca uncharacterized LOC101295944 (LOC101295944), mRNA	NA	smo:SELMODRAFT_437242/2e-33/hypothetical protein; K17065 dynamin 1-like protein [EC:3.6.5.5]	NA	NA	biological_process:GO:0010258//NADH dehydrogenase complex (plastoquinone) assembly;GO:0055114//oxidation-reduction process;cellular_component:GO:0009535//chloroplast thylakoid membrane;GO:0005886//plasma membrane;molecular_function:GO:0016655//oxidoreductase activity, acting on NAD(P)H, quinone or similar compound as acceptor;
CL3203.Contig4_All	1142	2.56957	0.000916112	Up	NA	gi|470131925|ref|XR_184827.1|/9e-11/PREDICTED: Fragaria vesca subsp. vesca putative pentatricopeptide repeat-containing protein At5g43820-like (LOC101293312), misc_RNA	NA	NA	NA	NA	NA
CL5187.Contig2_All	1814	-1.33632	9.23e-08	Down	gi|470127490|ref|XP_004299702.1|/0/PREDICTED: serine/threonine-protein kinase-like protein At1g28390 [Fragaria vesca subsp. vesca]	gi|470127489|ref|XM_004299654.1|/0.0/PREDICTED: Fragaria vesca subsp. vesca serine/threonine-protein kinase-like protein At1g28390-like (LOC101311576), mRNA	sp|Q9SGN7|CCR12_ARATH/3e-120/Serine/threonine-protein kinase-like protein At1g28390 OS=Arabidopsis thaliana GN=At1g28390 PE=2 SV=1	adu:107460935/2e-155/serine/threonine-protein kinase-like protein At1g28390; K04730 interleukin-1 receptor-associated kinase 1 [EC:2.7.11.1]	Cgl2127_1/1e-12/---	PS50011/33.008/Protein kinase domain profile.	molecular_function:GO:0000166//nucleotide binding;GO:0004672//protein kinase activity;
Unigene20737_All	345	-1.91883	0.00177983	Down	NA	NA	NA	NA	NA	NA	NA
CL966.Contig24_All	2099	2.29369	0.00121295	Up	gi|645252196|ref|XP_008232012.1|/0/PREDICTED: probable aspartyl aminopeptidase [Prunus mume]	gi|470147735|ref|XM_004309388.1|/0.0/PREDICTED: Fragaria vesca subsp. vesca probable aspartyl aminopeptidase-like (LOC101295674), mRNA	sp|B9RAJ0|DNPEP_RICCO/3e-129/Probable aspartyl aminopeptidase OS=Ricinus communis GN=RCOM_1506700 PE=2 SV=2	pmum:103331182/0.0/probable aspartyl aminopeptidase; K01267 aspartyl aminopeptidase [EC:3.4.11.21]	SPAC4F10.02/1e-83/---	PF02127/8.6E-73/Aminopeptidase I zinc metalloprotease (M18)	biological_process:GO:0006508//proteolysis;cellular_component:GO:0009570//chloroplast stroma;molecular_function:GO:0008237//metallopeptidase activity;GO:0004177//aminopeptidase activity;GO:0008270//zinc ion binding;
CL6854.Contig2_All	1465	1.29814	2.78e-11	Up	gi|470105346|ref|XP_004289046.1|/0/PREDICTED: G2/mitotic-specific cyclin-2 [Fragaria vesca subsp. vesca]	gi|470105345|ref|XM_004288998.1|/0.0/PREDICTED: Fragaria vesca subsp. vesca G2/mitotic-specific cyclin-1-like (LOC101308911), mRNA	sp|P46277|CCNB1_MEDSV/2e-168/G2/mitotic-specific cyclin-1 OS=Medicago sativa subsp. varia PE=2 SV=1	fve:101308911/0.0/G2/mitotic-specific cyclin-2; K05868 cyclin B	SPBC582.03/4e-46/---	PF02984/1.8E-34/Cyclin, C-terminal domain	cellular_component:GO:0005634//nucleus;
CL3986.Contig3_All	1523	1.75162	0.00165869	Up	gi|764567844|ref|XP_011462267.1|/4.06888e-169/PREDICTED: meiotic recombination protein DMC1 homolog isoform X2 [Fragaria vesca subsp. vesca]	gi|470120574|ref|XR_184408.1|/0.0/PREDICTED: Fragaria vesca subsp. vesca meiotic recombination protein DMC1 homolog (LOC101302822), misc_RNA	sp|Q96449|DMC1_SOYBN/3e-161/Meiotic recombination protein DMC1 homolog OS=Glycine max PE=2 SV=1	fve:101293482/6e-169/meiotic recombination protein DMC1 homolog; K10872 meiotic recombination protein DMC1	SPAC8E11.03c/1e-83/---	PS50162/42.858/RecA family profile 1.	biological_process:GO:0007131//reciprocal meiotic recombination;GO:0006281//DNA repair;cellular_component:GO:0005634//nucleus;molecular_function:GO:0003677//DNA binding;GO:0005524//ATP binding;GO:0008094//DNA-dependent ATPase activity;
Unigene8839_All	589	1.601	1.39e-05	Up	gi|470104479|ref|XP_004288629.1|/5.08566e-51/PREDICTED: non-specific lipid-transfer protein 2-like [Fragaria vesca subsp. vesca]	gi|470104478|ref|XM_004288581.1|/0.0/PREDICTED: Fragaria vesca subsp. vesca non-specific lipid-transfer protein 2-like (LOC101310262), mRNA	sp|Q43681|NLTP_VIGUN/1e-23/Probable non-specific lipid-transfer protein AKCS9 OS=Vigna unguiculata PE=2 SV=1	vvi:100232857/5e-11/ADH7; alcohol dehydrogenase 7; K18857 alcohol dehydrogenase class-P [EC:1.1.1.1]	NA	PF14368/1.6E-9/Probable lipid transfer	NA
Unigene19155_All	382	3.49317	6.75e-07	Up	NA	NA	NA	NA	NA	NA	NA
CL6112.Contig1_All	1193	-1.02149	0.00257678	Down	gi|470127306|ref|XP_004299613.1|/9.42805e-165/PREDICTED: uncharacterized WD repeat-containing protein C2A9.03 [Fragaria vesca subsp. vesca]	gi|470127305|ref|XM_004299565.1|/0.0/PREDICTED: Fragaria vesca subsp. vesca uncharacterized LOC101308765 (LOC101308765), mRNA	sp|Q8H0T9|KTNB1_ARATH/3e-13/Katanin p80 WD40 repeat-containing subunit B1 homolog OS=Arabidopsis thaliana GN=At5g23430 PE=2 SV=3	bdi:100832822/1e-13/COMPASS-like H3K4 histone methylase component WDR5A; K14963 COMPASS component SWD3	all0283_3/5e-13/---	PS50082/14.084/Trp-Asp (WD) repeats profile.	NA
Unigene10539_All	1945	1.30108	1.32e-08	Up	gi|470134524|ref|XP_004303098.1|/0/PREDICTED: mitotic checkpoint serine/threonine-protein kinase BUB1 isoform X2 [Fragaria vesca subsp. vesca]	gi|470134523|ref|XM_004303050.1|/0.0/PREDICTED: Fragaria vesca subsp. vesca checkpoint serine/threonine-protein kinase BUB1-like (LOC101303721), mRNA	sp|F4IVI0|BUB1_ARATH/0.0/Mitotic checkpoint serine/threonine-protein kinase BUB1 OS=Arabidopsis thaliana GN=BUB1 PE=1 SV=1	fve:101303721/0.0/mitotic checkpoint serine/threonine-protein kinase BUB1; K02178 checkpoint serine/threonine-protein kinase [EC:2.7.11.1]	slr0152/1e-06/---	PF08311/7.2E-22/Mad3/BUB1 homology region 1	NA
CL5479.Contig3_All	3383	1.09267	3.62e-09	Up	gi|470109653|ref|XP_004291107.1|/0/PREDICTED: abscisic acid 8&apos;-hydroxylase 4-like [Fragaria vesca subsp. vesca]	gi|470109652|ref|XM_004291059.1|/0.0/PREDICTED: Fragaria vesca subsp. vesca abscisic acid 8'-hydroxylase 3-like (LOC101304444), mRNA	sp|Q0J185|ABAH3_ORYSJ/0.0/Abscisic acid 8'-hydroxylase 3 OS=Oryza sativa subsp. japonica GN=CYP707A7 PE=2 SV=1	fve:101304444/0.0/abscisic acid 8'-hydroxylase 4-like; K09843 (+)-abscisic acid 8'-hydroxylase [EC:1.14.13.93]	slr0574/3e-53/---	PR00463/1.4E-17/E-class P450 group I signature	biological_process:GO:0055114//oxidation-reduction process;molecular_function:GO:0016705//oxidoreductase activity, acting on paired donors, with incorporation or reduction of molecular oxygen;GO:0020037//heme binding;GO:0005506//iron ion binding;GO:0004497//monooxygenase activity;
CL1591.Contig2_All	875	-1.78415	1.24e-24	Down	gi|764596397|ref|XP_011466040.1|/5.48512e-98/PREDICTED: uncharacterized protein LOC101300926 [Fragaria vesca subsp. vesca]	gi|470132501|ref|XM_004302072.1|/0.0/PREDICTED: Fragaria vesca subsp. vesca uncharacterized LOC101300926 (LOC101300926), mRNA	NA	NA	NA	NA	NA
CL724.Contig2_All	2041	-1.77796	2.01e-07	Down	gi|764510877|ref|XP_004287680.2|/0/PREDICTED: pectinesterase [Fragaria vesca subsp. vesca]	gi|470102476|ref|XM_004287632.1|/0.0/PREDICTED: Fragaria vesca subsp. vesca probable pectinesterase/pectinesterase inhibitor 54-like (LOC101309577), mRNA	sp|Q3E989|PME54_ARATH/8e-119/Probable pectinesterase/pectinesterase inhibitor 54 OS=Arabidopsis thaliana GN=PME54 PE=2 SV=1	fve:101309577/0.0/pectinesterase; K01051 pectinesterase [EC:3.1.1.11]	CAC3373/1e-38/---	SM00856/1.6E-17/Plant invertase/pectin methylesterase inhibitor	biological_process:GO:0045490//pectin catabolic process;GO:0043086//negative regulation of catalytic activity;GO:0042545//cell wall modification;cellular_component:GO:0005618//cell wall;molecular_function:GO:0045330//aspartyl esterase activity;GO:0004857//enzyme inhibitor activity;GO:0030599//pectinesterase activity;
CL2669.Contig3_All	2481	-1.75521	1.5e-10	Down	gi|470129708|ref|XP_004300751.1|/0/PREDICTED: molybdenum cofactor sulfurase 3-like [Fragaria vesca subsp. vesca]	gi|470129707|ref|XM_004300703.1|/0.0/PREDICTED: Fragaria vesca subsp. vesca molybdenum cofactor sulfurase-like (LOC101296295), mRNA	sp|Q9C5X8|MOCOS_ARATH/1e-18/Molybdenum cofactor sulfurase OS=Arabidopsis thaliana GN=ABA3 PE=1 SV=1	pda:103722273/6e-35/molybdenum cofactor sulfurase-like; K15631 molybdenum cofactor sulfurtransferase [EC:2.8.1.9]	MA1950/8e-38/---	PTHR14237:SF12/6.6E-227/--	molecular_function:GO:0003824//catalytic activity;
CL1621.Contig3_All	2501	1.12465	0.000144705	Up	gi|470145320|ref|XP_004308289.1|/1.76719e-140/PREDICTED: origin of replication complex subunit 1-like [Fragaria vesca subsp. vesca]	gi|470106468|ref|XR_183864.1|/0.0/PREDICTED: Fragaria vesca subsp. vesca origin recognition complex subunit 1-like (LOC101311051), misc_RNA	NA	fve:101313162/3e-141/origin of replication complex subunit 1-like; K02603 origin recognition complex subunit 1	SPBC29A10.15/2e-29/---	PTHR10763/6.4E-77/--	molecular_function:GO:0005524//ATP binding;GO:0003682//chromatin binding;GO:0008270//zinc ion binding;
CL7138.Contig1_All	1420	1.67223	1.74e-285	Up	gi|470142111|ref|XP_004306762.1|/1.3044e-178/PREDICTED: dehydration-responsive protein RD22-like [Fragaria vesca subsp. vesca]	gi|470142110|ref|XM_004306714.1|/0.0/PREDICTED: Fragaria vesca subsp. vesca dehydration-responsive protein RD22-like, transcript variant 2 (LOC101292340), mRNA	sp|Q08298|RD22_ARATH/3e-51/Dehydration-responsive protein RD22 OS=Arabidopsis thaliana GN=RD22 PE=2 SV=1	bvg:104885038/5e-20/filaggrin-like; K12472 epidermal growth factor receptor substrate 15	NA	PS51277/71.497/BURP domain profile.	NA
Unigene22627_All	1355	-1.76482	2.15e-43	Down	gi|470123527|ref|XP_004297776.1|/7.21959e-179/PREDICTED: inositol oxygenase 1-like [Fragaria vesca subsp. vesca]	gi|470123526|ref|XM_004297728.1|/0.0/PREDICTED: Fragaria vesca subsp. vesca inositol oxygenase 1-like (LOC101302448), mRNA	sp|Q8L799|MIOX1_ARATH/1e-141/Inositol oxygenase 1 OS=Arabidopsis thaliana GN=MIOX1 PE=2 SV=1	fve:101302448/1e-179/inositol oxygenase 1-like; K00469 inositol oxygenase [EC:1.13.99.1]	NA	PF05153/3.4E-125/Family of unknown function (DUF706)	NA
CL9389.Contig3_All	777	1.31978	0.00270673	Up	NA	NA	NA	NA	NA	NA	NA
CL3859.Contig1_All	2208	-1.96334	1.21e-204	Down	gi|764594444|ref|XP_011465624.1|/0/PREDICTED: uncharacterized protein LOC105351804 [Fragaria vesca subsp. vesca]	gi|470129835|ref|XM_004300766.1|/0.0/PREDICTED: Fragaria vesca subsp. vesca uncharacterized LOC101291534 (LOC101291534), mRNA	NA	NA	NA	SM00791/2.0E-4/--	NA
CL246.Contig4_All	2345	-3.07944	2.33e-201	Down	gi|470104063|ref|XP_004288434.1|/0/PREDICTED: uncharacterized protein LOC101297774 [Fragaria vesca subsp. vesca]	gi|470104062|ref|XM_004288386.1|/0.0/PREDICTED: Fragaria vesca subsp. vesca uncharacterized LOC101297774 (LOC101297774), mRNA	sp|Q0JIL1|NRX2_ORYSJ/1e-07/Probable nucleoredoxin 2 OS=Oryza sativa subsp. japonica GN=Os01g0794400 PE=2 SV=1	mdm:103421379/8e-26/uncharacterized LOC103421379; K17609 nucleoredoxin [EC:1.8.1.8]	NA	PF14576/5.2E-98/Sieve element occlusion N-terminus	NA
CL920.Contig1_All	949	-1.01704	0.00547626	Down	gi|470102298|ref|XP_004287592.1|/4.47226e-120/PREDICTED: pre-mRNA cleavage factor Im 25 kDa subunit 1 [Fragaria vesca subsp. vesca]	gi|470102297|ref|XM_004287544.1|/0.0/PREDICTED: Fragaria vesca subsp. vesca cleavage and polyadenylation specificity factor subunit 5-like (LOC101307826), mRNA	NA	fve:101307826/8e-121/pre-mRNA cleavage factor Im 25 kDa subunit 1; K14397 cleavage and polyadenylation specificity factor subunit 5	NA	PF13869/5.4E-67/Nucleotide hydrolase	biological_process:GO:0006378//mRNA polyadenylation;cellular_component:GO:0005849//mRNA cleavage factor complex;molecular_function:GO:0003729//mRNA binding;GO:0016787//hydrolase activity;
CL2926.Contig1_All	1739	-1.1708	1.81e-13	Down	gi|470103030|ref|XP_004287949.1|/0/PREDICTED: probable beta-1,3-galactosyltransferase 2 isoform X1 [Fragaria vesca subsp. vesca]	gi|470103029|ref|XM_004287901.1|/0.0/PREDICTED: Fragaria vesca subsp. vesca probable beta-1,3-galactosyltransferase 2-like (LOC101292929), mRNA	sp|A8MRC7|B3GT2_ARATH/0.0/Probable beta-1,3-galactosyltransferase 2 OS=Arabidopsis thaliana GN=B3GALT2 PE=2 SV=1	sita:101781507/2e-135/mitotic spindle checkpoint protein MAD1; K06638 mitotic spindle assembly checkpoint protein MAD1	NA	PF01762/1.3E-51/Galactosyltransferase	NA
CL4387.Contig1_All	1232	-2.334	0.00274079	Down	gi|764603434|ref|XP_011466799.1|/5.05047e-152/PREDICTED: protein CDI [Fragaria vesca subsp. vesca]	gi|470134383|ref|XM_004302985.1|/0.0/PREDICTED: Fragaria vesca subsp. vesca histone deacetylase HDT3-like (LOC101307412), mRNA	NA	zma:103636928/5e-15/GRMZM2G167521; uncharacterized LOC103636928; K03768 peptidyl-prolyl cis-trans isomerase B (cyclophilin B) [EC:5.2.1.8]	NA	NA	biological_process:GO:0009846//pollen germination;GO:0009860//pollen tube growth;cellular_component:GO:0005829//cytosol;
CL798.Contig1_All	1018	-1.04626	8.7e-06	Down	gi|764535498|ref|XP_011458710.1|/7.60597e-76/PREDICTED: glutathione S-transferase PARB-like isoform X1 [Fragaria vesca subsp. vesca]	gi|470112852|ref|XM_004292596.1|/0.0/PREDICTED: Fragaria vesca subsp. vesca glutathione S-transferase PARB-like (LOC101308444), mRNA	sp|P46423|GSTF_HYOMU/3e-46/Glutathione S-transferase OS=Hyoscyamus muticus PE=1 SV=1	tcc:TCM_004591/4e-70/Glutathione S-transferase phi 8; K00799 glutathione S-transferase [EC:2.5.1.18]	yliJ/9e-13/---	PTHR11260/1.9E-62/--	NA
Unigene7378_All	415	2.83815	0.000116885	Up	gi|703126349|ref|XP_010103557.1|/3.96682e-07/hypothetical protein L484_023051 [Morus notabilis] &gt;gi|587908381|gb|EXB96334.1| hypothetical protein L484_023051 [Morus notabilis]	NA	NA	NA	NA	NA	NA
Unigene29108_All	1283	-1.02404	6.17e-12	Down	gi|470126261|ref|XP_004299108.1|/6.68676e-171/PREDICTED: myb family transcription factor APL isoform X1 [Fragaria vesca subsp. vesca] &gt;gi|764582477|ref|XP_011464128.1| PREDICTED: myb family transcription factor APL isoform X1 [Fragaria vesca subsp. vesca]	gi|470126260|ref|XM_004299060.1|/0.0/PREDICTED: Fragaria vesca subsp. vesca uncharacterized LOC101302357 (LOC101302357), mRNA	sp|Q9SAK5|APL_ARATH/1e-53/Myb family transcription factor APL OS=Arabidopsis thaliana GN=APL PE=2 SV=2	mus:103984394/2e-55/uncharacterized protein LOC103984394; K14317 nuclear pore complex protein Nup214	NA	PF00249/5.5E-22/Myb-like DNA-binding domain	biological_process:GO:0006355//regulation of transcription, DNA-templated;cellular_component:GO:0005634//nucleus;molecular_function:GO:0003677//DNA binding;
CL5493.Contig3_All	1079	-1.93154	1.38e-05	Down	gi|1000960413|ref|XP_015576153.1|/4.32828e-08/PREDICTED: myb-related protein 305 isoform X2 [Ricinus communis]	gi|470123484|ref|XM_004297708.1|/6e-92/PREDICTED: Fragaria vesca subsp. vesca synaptotagmin-3-like (LOC101295997), mRNA	sp|P81396|MYB40_ANTMA/5e-10/Myb-related protein 340 OS=Antirrhinum majus GN=MYB340 PE=2 SV=1	adu:107490035/3e-09/myb-related protein 305-like; K09422 myb proto-oncogene protein, plant	NA	NA	NA
Unigene23670_All	1022	2.64242	6.49e-08	Up	gi|470136563|ref|XP_004304056.1|/3.49301e-129/PREDICTED: uncharacterized protein LOC101291846 [Fragaria vesca subsp. vesca]	gi|470136562|ref|XM_004304008.1|/0.0/PREDICTED: Fragaria vesca subsp. vesca uncharacterized LOC101291846 (LOC101291846), mRNA	sp|C0HJG8|BSP_BOSSE/4e-08/Basic secretory protease (Fragments) OS=Boswellia serrata PE=1 SV=1	NA	NA	PF04450/1.5E-58/Peptidase of plants and bacteria	NA
Unigene6456_All	909	2.38641	1.18e-135	Up	gi|470149010|ref|XP_004310038.1|/2.41899e-43/PREDICTED: uncharacterized protein LOC101295883 [Fragaria vesca subsp. vesca]	gi|470149009|ref|XM_004309990.1|/0.0/PREDICTED: Fragaria vesca subsp. vesca uncharacterized LOC101295883, transcript variant 2 (LOC101295883), mRNA	NA	NA	NA	PF06522/9.6E-30/NADH-ubiquinone reductase complex 1 MLRQ subunit	cellular_component:GO:0016021//integral component of membrane;
CL8940.Contig1_All	2554	-1.25598	0.000153761	Down	gi|544216853|ref|XP_005538571.1|/4.23141e-14/hypothetical protein CYME_CMR327C [Cyanidioschyzon merolae strain 10D] &gt;gi|449019133|dbj|BAM82535.1| hypothetical protein CYME_CMR327C [Cyanidioschyzon merolae strain 10D]	gi|154183911|gb|EU024868.1|/4e-27/Fragaria vesca subsp. americana clone fosmid 73I22, complete sequence	sp|P20075|LEAD8_DAUCA/9e-06/Embryonic protein DC-8 OS=Daucus carota PE=3 SV=1	NA	NA	NA	NA
Unigene20473_All	2431	4.14148	5.35e-37	Up	gi|470140126|ref|XP_004305795.1|/0/PREDICTED: pollen receptor-like kinase 4 [Fragaria vesca subsp. vesca]	gi|470140125|ref|XM_004305747.1|/0.0/PREDICTED: Fragaria vesca subsp. vesca probable LRR receptor-like serine/threonine-protein kinase RLK-like (LOC101301321), mRNA	sp|Q9LPT1|Y1061_ARATH/6e-174/Probably inactive leucine-rich repeat receptor-like protein kinase At1g50610 OS=Arabidopsis thaliana GN=At1g50610 PE=2 SV=1	pxb:103967685/0.0/probably inactive leucine-rich repeat receptor-like protein kinase At1g50610; K04730 interleukin-1 receptor-associated kinase 1 [EC:2.7.11.1]	CAC0404_1/1e-08/---	PF13855/7.0E-9/Leucine rich repeat	NA
Unigene13366_All	1060	2.76606	3.94e-05	Up	gi|764564741|ref|XP_011461752.1|/6.45225e-134/PREDICTED: uncharacterized protein LOC105350678 [Fragaria vesca subsp. vesca]	NA	sp|Q43143|PMEU1_SOLLC/6e-07/Pectinesterase/pectinesterase inhibitor U1 OS=Solanum lycopersicum GN=PMEU1 PE=2 SV=1	bvg:104890334/5e-08/probable pectinesterase/pectinesterase inhibitor 21; K01051 pectinesterase [EC:3.1.1.11]	NA	PTHR31707/1.8E-21/--	NA
CL1077.Contig1_All	313	-1.74024	0.00199165	Down	gi|763753228|gb|KJB20616.1|/2.94834e-15/hypothetical protein B456_003G156400 [Gossypium raimondii]	gi|18846|emb|X65990.1|/8e-30/Humulus japonicus small cytoplasmic RNA 7S (7S RNA gene), clone_lib Z13o >gi|527047921|tpe|HG323776.1| TPA: Humulus japonicus SRP RNA for signal recognition particle RNA	NA	brp:103833230/1e-06/30S ribosomal protein S17, chloroplastic-like; K02961 small subunit ribosomal protein S17	NA	NA	NA
CL3038.Contig3_All	1312	3.65342	5.26e-118	Up	gi|764634777|ref|XP_011470023.1|/0/PREDICTED: LOW QUALITY PROTEIN: putative pectinesterase 63 [Fragaria vesca subsp. vesca]	gi|470146788|ref|XR_185364.1|/0.0/PREDICTED: Fragaria vesca subsp. vesca pectinesterase 2-like (LOC101294998), misc_RNA	sp|Q9LY19|PME48_ARATH/9e-107/Probable pectinesterase 48 OS=Arabidopsis thaliana GN=PME48 PE=2 SV=2	fve:101296228/2e-149/pectinesterase PPME1-like; K01051 pectinesterase [EC:3.1.1.11]	CAC3373/2e-30/---	PS00503/-/Pectinesterase signature 2.	biological_process:GO:0045490//pectin catabolic process;GO:0042545//cell wall modification;cellular_component:GO:0005618//cell wall;molecular_function:GO:0045330//aspartyl esterase activity;GO:0030599//pectinesterase activity;
CL4024.Contig2_All	3124	1.18338	0.0007508	Up	gi|764559524|ref|XP_011461047.1|/0/PREDICTED: uncharacterized protein LOC101312035 [Fragaria vesca subsp. vesca]	gi|470116445|ref|XM_004294345.1|/0.0/PREDICTED: Fragaria vesca subsp. vesca uncharacterized LOC101312035 (LOC101312035), mRNA	NA	fve:101312035/0.0/uncharacterized LOC101312035; K18270 Rab3 GTPase-activating protein catalytic subunit	NA	PTHR21422/6.4E-111/--	biological_process:GO:0043547//positive regulation of GTPase activity;molecular_function:GO:0005096//GTPase activator activity;
CL2526.Contig4_All	925	-1.16074	1.43e-05	Down	gi|764580973|ref|XP_011463928.1|/9.30857e-99/PREDICTED: uncharacterized protein LOC101295341 isoform X2 [Fragaria vesca subsp. vesca]	gi|470129861|ref|XM_004300779.1|/1e-114/PREDICTED: Fragaria vesca subsp. vesca uncharacterized LOC101295341 (LOC101295341), mRNA	NA	NA	NA	PF03168/2.5E-9/Late embryogenesis abundant protein	NA
CL5574.Contig2_All	1252	1.43668	0.0033383	Up	gi|470136217|ref|XP_004303893.1|/5.03713e-107/PREDICTED: glutathione S-transferase F9-like [Fragaria vesca subsp. vesca]	gi|470136218|ref|XM_004303846.1|/0.0/PREDICTED: Fragaria vesca subsp. vesca glutathione S-transferase F9-like, transcript variant 2 (LOC101315068), mRNA	sp|O80852|GSTF9_ARATH/5e-75/Glutathione S-transferase F9 OS=Arabidopsis thaliana GN=GSTF9 PE=1 SV=1	fve:101315068/9e-108/glutathione S-transferase F9-like; K00799 glutathione S-transferase [EC:2.5.1.18]	SMc00097/1e-06/---	PF00043/5.1E-15/Glutathione S-transferase, C-terminal domain	NA
Unigene13029_All	1660	1.63818	1.42e-09	Up	gi|470144338|ref|XP_004307816.1|/0/PREDICTED: trehalose-phosphate phosphatase A [Fragaria vesca subsp. vesca] &gt;gi|764635264|ref|XP_011470083.1| PREDICTED: trehalose-phosphate phosphatase A [Fragaria vesca subsp. vesca] &gt;gi|764635268|ref|XP_011470084.1| PREDICTED: trehalose-phosphate phosphatase A [Fragaria vesca subsp. vesca] &gt;gi|764635272|ref|XP_011470085.1| PREDICTED: trehalose-phospha…	gi|470144337|ref|XM_004307768.1|/0.0/PREDICTED: Fragaria vesca subsp. vesca trehalose-phosphate phosphatase A-like (LOC101305798), mRNA	sp|O64896|TPPA_ARATH/1e-150/Trehalose-phosphate phosphatase A OS=Arabidopsis thaliana GN=TPPA PE=1 SV=1	fve:101305798/0.0/trehalose-phosphate phosphatase A; K01087 trehalose 6-phosphate phosphatase [EC:3.1.3.12]	MT2062_2/8e-36/---	PTHR10788:SF19/7.2E-176/--	biological_process:GO:0005992//trehalose biosynthetic process;GO:0016311//dephosphorylation;molecular_function:GO:0004805//trehalose-phosphatase activity;
CL6385.Contig3_All	440	-1.86711	0.000604232	Down	gi|470149254|ref|XP_004310154.1|/5.84627e-67/PREDICTED: protein TRANSPARENT TESTA 12-like [Fragaria vesca subsp. vesca]	gi|470149253|ref|XM_004310106.1|/0.0/PREDICTED: Fragaria vesca subsp. vesca protein TRANSPARENT TESTA 12-like (LOC101307660), mRNA	sp|Q9SN46|LRX5_ARATH/2e-06/Leucine-rich repeat extensin-like protein 5 OS=Arabidopsis thaliana GN=LRX5 PE=2 SV=2	fve:101307660/1e-67/protein TRANSPARENT TESTA 12-like; K03327 multidrug resistance protein, MATE family	NA	PTHR11206/5.8E-38/--	biological_process:GO:0006855//drug transmembrane transport;cellular_component:GO:0016021//integral component of membrane;molecular_function:GO:0015238//drug transmembrane transporter activity;GO:0015297//antiporter activity;
CL4411.Contig2_All	680	-1.63822	0.00302031	Down	gi|470108950|ref|XP_004290765.1|/1.18958e-82/PREDICTED: acidic proline-rich protein PRP33-like [Fragaria vesca subsp. vesca]	gi|470108949|ref|XM_004290717.1|/0.0/PREDICTED: Fragaria vesca subsp. vesca uncharacterized LOC101299921 (LOC101299921), mRNA	sp|O82089|CCH_ARATH/1e-10/Copper transport protein CCH OS=Arabidopsis thaliana GN=CCH PE=1 SV=1	bna:106388812/1e-10/copper transport protein CCH; K07213 copper chaperone	NA	PS50846/9.682/Heavy-metal-associated domain profile.	NA
CL5584.Contig1_All	1454	1.48019	9.99e-05	Up	gi|470110326|ref|XP_004291435.1|/7.43033e-169/PREDICTED: probable beta-1,3-galactosyltransferase 9 [Fragaria vesca subsp. vesca]	gi|470110325|ref|XM_004291387.1|/0.0/PREDICTED: Fragaria vesca subsp. vesca probable beta-1,3-galactosyltransferase 10-like (LOC101304832), mRNA	sp|Q5XEZ1|B3GT9_ARATH/4e-129/Probable beta-1,3-galactosyltransferase 9 OS=Arabidopsis thaliana GN=B3GALT9 PE=2 SV=1	osa:4325085/3e-45/P0471B04.5, P0471B04.6; mitotic spindle checkpoint protein MAD1; K06638 mitotic spindle assembly checkpoint protein MAD1	NA	PTHR11214/2.1E-172/--	biological_process:GO:0006486//protein glycosylation;cellular_component:GO:0016021//integral component of membrane;GO:0000139//Golgi membrane;molecular_function:GO:0008378//galactosyltransferase activity;
Unigene3549_All	1789	3.3456	1.66e-159	Up	gi|764566043|ref|XP_011461905.1|/0/PREDICTED: beta-glucosidase 12-like [Fragaria vesca subsp. vesca]	gi|470120507|ref|XR_184405.1|/0.0/PREDICTED: Fragaria vesca subsp. vesca beta-glucosidase 12-like (LOC101300431), misc_RNA	sp|Q7XKV4|BGL12_ORYSJ/0.0/Beta-glucosidase 12 OS=Oryza sativa subsp. japonica GN=BGLU12 PE=2 SV=2	fve:101300431/0.0/beta-glucosidase 12-like; K01188 beta-glucosidase [EC:3.2.1.21]	BH1923/8e-90/---	PTHR10353/3.8E-303/--	biological_process:GO:0005975//carbohydrate metabolic process;molecular_function:GO:0004553//hydrolase activity, hydrolyzing O-glycosyl compounds;
CL2221.Contig7_All	2279	-2.21523	0.00215221	Down	gi|764549926|ref|XP_011460004.1|/1.82431e-154/PREDICTED: DNA topoisomerase 2-like isoform X1 [Fragaria vesca subsp. vesca] &gt;gi|764549930|ref|XP_011460005.1| PREDICTED: DNA topoisomerase 2-like isoform X1 [Fragaria vesca subsp. vesca] &gt;gi|764549935|ref|XP_011460006.1| PREDICTED: DNA topoisomerase 2-like isoform X1 [Fragaria vesca subsp. vesca]	gi|470114211|ref|XM_004293262.1|/1e-156/PREDICTED: Fragaria vesca subsp. vesca DNA topoisomerase 2-like (LOC101299838), mRNA	sp|P30182|TOP2_ARATH/1e-110/DNA topoisomerase 2 OS=Arabidopsis thaliana GN=TOP2 PE=2 SV=2	fve:101299838/3e-155/DNA topoisomerase 2-like; K03164 DNA topoisomerase II [EC:5.99.1.3]	ECU04g0350_2/7e-44/---	PTHR10169:SF38/8.4E-80/--	NA
CL6160.Contig1_All	2119	-1.03064	3.47e-193	Down	gi|470127268|ref|XP_004299596.1|/0/PREDICTED: protein EDS1B-like [Fragaria vesca subsp. vesca]	gi|470127267|ref|XM_004299548.1|/0.0/PREDICTED: Fragaria vesca subsp. vesca uncharacterized LOC101302655 (LOC101302655), mRNA	sp|Q4F883|SG101_ARATH/2e-15/Senescence-associated carboxylesterase 101 OS=Arabidopsis thaliana GN=SAG101 PE=1 SV=1	fve:101302655/0.0/protein EDS1B-like; K18875 enhanced disease susceptibility 1 protein	NA	PF01764/2.1E-16/Lipase (class 3)	NA
CL3742.Contig4_All	535	1.46128	3.87e-05	Up	gi|470109849|ref|XP_004291200.1|/1.615e-44/PREDICTED: uncharacterized protein LOC101308734 isoform X2 [Fragaria vesca subsp. vesca]	gi|470109848|ref|XM_004291152.1|/0.0/PREDICTED: Fragaria vesca subsp. vesca uncharacterized LOC101308734, transcript variant 2 (LOC101308734), mRNA	NA	NA	NA	NA	NA
CL3037.Contig1_All	522	-2.44499	0.00169128	Down	gi|764551745|ref|XP_011460195.1|/1.50879e-65/PREDICTED: adenylate isopentenyltransferase-like [Fragaria vesca subsp. vesca]	gi|470119137|ref|XM_004295625.1|/1e-141/PREDICTED: Fragaria vesca subsp. vesca adenylate isopentenyltransferase-like (LOC101295902), mRNA	sp|Q5GHF7|IPT_HUMLU/3e-35/Adenylate isopentenyltransferase OS=Humulus lupulus PE=1 SV=1	fve:105350247/3e-66/adenylate isopentenyltransferase-like; K10760 adenylate isopentenyltransferase (cytokinin synthase)	NA	PF01715/8.3E-8/IPP transferase	NA
Unigene2965_All	5784	1.2606	0.00168469	Up	gi|764639894|ref|XP_011470678.1|/0/PREDICTED: uncharacterized protein LOC101291584 [Fragaria vesca subsp. vesca]	gi|470147064|ref|XM_004309089.1|/0.0/PREDICTED: Fragaria vesca subsp. vesca uncharacterized LOC101291584 (LOC101291584), mRNA	NA	NA	NA	PF13589/6.8E-21/Histidine kinase-, DNA gyrase B-, and HSP90-like ATPase	NA
Unigene2982_All	1801	-2.08106	0.000592684	Down	NA	gi|470142634|ref|XR_185200.1|/3e-95/PREDICTED: Fragaria vesca subsp. vesca uncharacterized LOC101297185 (LOC101297185), misc_RNA	NA	NA	NA	NA	NA
CL3590.Contig6_All	929	2.06504	0.00288712	Up	NA	gi|470101275|ref|XM_004287053.1|/7e-08/PREDICTED: Fragaria vesca subsp. vesca uncharacterized LOC101304409 (LOC101304409), mRNA	NA	NA	NA	NA	NA
CL4264.Contig4_All	4181	1.79543	2.73e-08	Up	gi|764534298|ref|XP_011458602.1|/0/PREDICTED: calcium-transporting ATPase 12, plasma membrane-type [Fragaria vesca subsp. vesca]	gi|470108676|ref|XM_004290589.1|/0.0/PREDICTED: Fragaria vesca subsp. vesca calcium-transporting ATPase 12, plasma membrane-type-like (LOC101308923), mRNA	sp|Q9LY77|ACA12_ARATH/0.0/Calcium-transporting ATPase 12, plasma membrane-type OS=Arabidopsis thaliana GN=ACA12 PE=2 SV=1	fve:101308923/0.0/calcium-transporting ATPase 12, plasma membrane-type; K01537 Ca2+-transporting ATPase [EC:3.6.3.8]	CAC2137/8e-108/---	PF00689/1.0E-43/Cation transporting ATPase, C-terminus	NA
Unigene15085_All	1351	3.90452	1.41e-08	Up	gi|764617475|ref|XP_011468147.1|/2.10367e-162/PREDICTED: alpha carbonic anhydrase 7-like [Fragaria vesca subsp. vesca]	gi|470141083|ref|XM_004306217.1|/1e-130/PREDICTED: Fragaria vesca subsp. vesca bifunctional monodehydroascorbate reductase and carbonic anhydrase nectarin-3-like (LOC101293035), mRNA	sp|Q84UV8|NEC3_NICLS/1e-48/Bifunctional monodehydroascorbate reductase and carbonic anhydrase nectarin-3 OS=Nicotiana langsdorffii x Nicotiana sanderae GN=NEC3 PE=1 SV=1	fve:105352521/4e-163/alpha carbonic anhydrase 7-like; K01674 carbonic anhydrase [EC:4.2.1.1]	BH0360/3e-35/---	PS51144/41.686/Alpha-carbonic anhydrases profile.	NA
CL4208.Contig2_All	1480	-1.07382	2.71e-11	Down	gi|470148951|ref|XP_004310010.1|/2.32723e-117/PREDICTED: very-long-chain 3-oxoacyl-CoA reductase 1-like [Fragaria vesca subsp. vesca]	gi|470148948|ref|XM_004309961.1|/8e-52/PREDICTED: Fragaria vesca subsp. vesca very-long-chain 3-oxoacyl-CoA reductase 1-like (LOC101311536), mRNA	sp|Q8L9C4|KCR1_ARATH/1e-79/Very-long-chain 3-oxoacyl-CoA reductase 1 OS=Arabidopsis thaliana GN=KCR1 PE=1 SV=1	fve:101311823/4e-118/very-long-chain 3-oxoacyl-CoA reductase 1-like; K10251 17beta-estradiol 17-dehydrogenase / very-long-chain 3-oxoacyl-CoA reductase [EC:1.1.1.62 1.1.1.330]	SPAC4G9.15/3e-32/---	PS00061/-/Short-chain dehydrogenases/reductases family signature.	NA
CL6461.Contig1_All	1455	1.53084	0.00389751	Up	gi|764559819|ref|XP_011461097.1|/0/PREDICTED: probable leucine-rich repeat receptor-like protein kinase At5g49770 [Fragaria vesca subsp. vesca] &gt;gi|764559822|ref|XP_011461098.1| PREDICTED: probable leucine-rich repeat receptor-like protein kinase At5g49770 [Fragaria vesca subsp. vesca] &gt;gi|764559825|ref|XP_011461099.1| PREDICTED: probable leucine-rich repeat receptor-like protein kinase At5…	gi|470119513|ref|XR_184379.1|/0.0/PREDICTED: Fragaria vesca subsp. vesca probable leucine-rich repeat receptor-like protein kinase At5g49770-like (LOC101315133), misc_RNA	sp|Q9LT96|Y5977_ARATH/4e-129/Probable leucine-rich repeat receptor-like protein kinase At5g49770 OS=Arabidopsis thaliana GN=At5g49770 PE=2 SV=1	dosa:Os01t0818600-01/8e-77/Os01g0818600; Similar to Leucine-rich repeat transmembrane protein kinase.; K04730 interleukin-1 receptor-associated kinase 1 [EC:2.7.11.1]	YAR019c/8e-22/---	PS50011/38.577/Protein kinase domain profile.	biological_process:GO:0006468//protein phosphorylation;cellular_component:GO:0016021//integral component of membrane;molecular_function:GO:0004674//protein serine/threonine kinase activity;GO:0005524//ATP binding;
Unigene31813_All	1883	2.48365	0.00143794	Up	gi|657993390|ref|XP_008388982.1|/2.8681e-173/PREDICTED: LOW QUALITY PROTEIN: sugar transporter ERD6-like 5 [Malus domestica]	gi|470138579|ref|XM_004304985.1|/0.0/PREDICTED: Fragaria vesca subsp. vesca uncharacterized LOC101307612 (LOC101307612), mRNA	sp|Q94CI6|EDL18_ARATH/6e-121/Sugar transporter ERD6-like 18 OS=Arabidopsis thaliana GN=SFP2 PE=2 SV=1	mdm:103451346/5e-174/sugar transporter ERD6-like 5; K08145 MFS transporter, SP family, solute carrier family 2 (facilitated glucose transporter), member 8	CAC1345/3e-35/---	PTHR24063/4.2E-81/--	NA
CL1616.Contig7_All	2184	1.40436	0.000107438	Up	gi|764616580|ref|XP_011468054.1|/0/PREDICTED: protein EMSY-LIKE 1 isoform X3 [Fragaria vesca subsp. vesca]	gi|470137230|ref|XM_004304325.1|/0.0/PREDICTED: Fragaria vesca subsp. vesca uncharacterized LOC101293025 (LOC101293025), mRNA	NA	gmx:100797921/1e-06/sister chromatid cohesion protein PDS5 homolog A-like; K11267 sister chromatid cohesion protein PDS5	NA	PS51138/23.884/EMSY N-terminal (ENT) domain profile.	NA
CL3539.Contig1_All	1450	-3.50288	2.08e-07	Down	gi|470104997|ref|XP_004288875.1|/0/PREDICTED: probable rhamnogalacturonate lyase B [Fragaria vesca subsp. vesca]	gi|470104996|ref|XM_004288827.1|/0.0/PREDICTED: Fragaria vesca subsp. vesca rhamnogalacturonate lyase-like (LOC101298655), mRNA	NA	fve:101298655/0.0/probable rhamnogalacturonate lyase B; K18195 rhamnogalacturonan endolyase [EC:4.2.2.23]	NA	PF14683/4.1E-60/Polysaccharide lyase family 4, domain III	NA
CL7749.Contig2_All	464	3.68651	7.74e-21	Up	gi|596096078|ref|XP_007221365.1|/2.33928e-20/hypothetical protein PRUPE_ppa024500mg [Prunus persica] &gt;gi|462418063|gb|EMJ22564.1| hypothetical protein PRUPE_ppa024500mg [Prunus persica]	gi|470104090|ref|XM_004288400.1|/0.0/PREDICTED: Fragaria vesca subsp. vesca glu S.griseus protease inhibitor-like (LOC101302008), mRNA	sp|P24076|BGIA_MOMCH/1e-14/Glu S.griseus protease inhibitor OS=Momordica charantia PE=1 SV=1	NA	NA	NA	biological_process:GO:0009611//response to wounding;GO:0010951//negative regulation of endopeptidase activity;molecular_function:GO:0004867//serine-type endopeptidase inhibitor activity;
Unigene5522_All	1345	1.65802	0.0019874	Up	gi|764594845|ref|XP_011465715.1|/9.87245e-52/PREDICTED: ent-kaurenoic acid oxidase 1-like [Fragaria vesca subsp. vesca]	gi|470142779|ref|XR_185213.1|/0.0/PREDICTED: Fragaria vesca subsp. vesca uncharacterized LOC101294597 (LOC101294597), misc_RNA	sp|B5BSX1|BAMO_GLYUR/9e-21/Beta-amyrin 11-oxidase OS=Glycyrrhiza uralensis GN=CYP88D6 PE=1 SV=1	pxb:103935419/3e-48/ent-kaurenoic acid oxidase 2-like; K04123 ent-kaurenoic acid hydroxylase [EC:1.14.13.79]	slr0574/3e-09/---	NA	biological_process:GO:0055114//oxidation-reduction process;cellular_component:GO:0016021//integral component of membrane;molecular_function:GO:0016705//oxidoreductase activity, acting on paired donors, with incorporation or reduction of molecular oxygen;GO:0020037//heme binding;GO:0005506//iron ion binding;GO:0004497//monooxygenase activity;
CL305.Contig2_All	3132	1.0716	2.59e-18	Up	gi|470115540|ref|XP_004293957.1|/0/PREDICTED: probable LRR receptor-like serine/threonine-protein kinase At5g45840 isoform X1 [Fragaria vesca subsp. vesca]	gi|470115539|ref|XM_004293909.1|/0.0/PREDICTED: Fragaria vesca subsp. vesca probable LRR receptor-like serine/threonine-protein kinase At5g45840-like (LOC101298686), mRNA	sp|C0LGU7|Y5458_ARATH/0.0/Probable LRR receptor-like serine/threonine-protein kinase At5g45840 OS=Arabidopsis thaliana GN=At5g45840 PE=2 SV=1	ath:AT1G28440/8e-40/HSL1; receptor-like protein kinase HSL1; K00924	NA	PF08263/4.6E-12/Leucine rich repeat N-terminal domain	NA
CL3010.Contig2_All	1099	-2.29688	0.00129339	Down	gi|764595822|ref|XP_004302031.2|/5.29462e-94/PREDICTED: multisubstrate pseudouridine synthase 7 [Fragaria vesca subsp. vesca]	gi|470132317|ref|XM_004301983.1|/0.0/PREDICTED: Fragaria vesca subsp. vesca multisubstrate pseudouridine synthase 7-like, transcript variant 2 (LOC101297847), mRNA	NA	fve:101297847/9e-95/multisubstrate pseudouridine synthase 7; K06176 tRNA pseudouridine13 synthase [EC:5.4.99.27]	NA	PTHR13326/4.6E-30/--	NA
CL3167.Contig1_All	2172	-1.48535	2.13e-216	Down	gi|470108290|ref|XP_004290454.1|/0/PREDICTED: laccase-14-like [Fragaria vesca subsp. vesca]	gi|470127507|ref|XM_004299663.1|/3e-15/PREDICTED: Fragaria vesca subsp. vesca laccase-14-like (LOC101314089), mRNA	sp|Q9FY79|LAC14_ARATH/7e-164/Laccase-14 OS=Arabidopsis thaliana GN=LAC14 PE=2 SV=1	fve:101300410/0.0/laccase-14-like; K05909 laccase [EC:1.10.3.2]	YFL041w/3e-37/---	PF07731/3.6E-37/Multicopper oxidase	biological_process:GO:0046274//lignin catabolic process;GO:0055114//oxidation-reduction process;cellular_component:GO:0048046//apoplast;molecular_function:GO:0052716//hydroquinone:oxygen oxidoreductase activity;GO:0005507//copper ion binding;
CL5091.Contig5_All	1004	-1.28522	4.51e-21	Down	gi|764523047|ref|XP_011457675.1|/1.609e-54/PREDICTED: collagen alpha-1(XVII) chain-like [Fragaria vesca subsp. vesca]	gi|34368591|gb|AC124144.2|/4e-19/Oryza sativa Japonica Group chromosome 5 clone OSJNBb0099P06, complete sequence	sp|Q9FPQ6|GP1_CHLRE/1e-11/Vegetative cell wall protein gp1 OS=Chlamydomonas reinhardtii GN=GP1 PE=1 SV=1	tcc:TCM_021134/2e-22/Serine/threonine-protein kinase isoform 1; K08819 cyclin-dependent kinase 12/13 [EC:2.7.11.22 2.7.11.23]	ML1556/2e-07/---	NA	NA
CL1288.Contig1_All	1782	-1.44258	2.27e-16	Down	gi|470103807|ref|XP_004288320.1|/0/PREDICTED: cytochrome P450 81E8-like [Fragaria vesca subsp. vesca]	gi|470103805|ref|XR_183749.1|/0.0/PREDICTED: Fragaria vesca subsp. vesca isoflavone 2'-hydroxylase-like (LOC101308613), misc_RNA	sp|P93147|C81E1_GLYEC/2e-152/Isoflavone 2'-hydroxylase OS=Glycyrrhiza echinata GN=CYP81E1 PE=1 SV=2	mdm:103432708/0.0/isoflavone 2'-hydroxylase-like; K00517	alr1450/4e-28/---	PS00086/-/Cytochrome P450 cysteine heme-iron ligand signature.	cellular_component:GO:0016020//membrane;molecular_function:GO:0046872//metal ion binding;GO:0016491//oxidoreductase activity;
Unigene17895_All	1818	3.44493	3.76e-06	Up	gi|764519240|ref|XP_011468346.1|/0/PREDICTED: rhamnogalacturonate lyase B-like isoform X2 [Fragaria vesca subsp. vesca]	gi|470106299|ref|XM_004289463.1|/0.0/PREDICTED: Fragaria vesca subsp. vesca probable rhamnogalacturonate lyase B-like (LOC101303861), mRNA	NA	fve:101303861/0.0/rhamnogalacturonate lyase B-like; K18195 rhamnogalacturonan endolyase [EC:4.2.2.23]	NA	PF06045/1.0E-69/Rhamnogalacturonate lyase family	biological_process:GO:0005975//carbohydrate metabolic process;molecular_function:GO:0030246//carbohydrate binding;GO:0003824//catalytic activity;
Unigene19900_All	1302	-1.61237	0.00131656	Down	gi|764640379|ref|XP_011470739.1|/2.12744e-47/PREDICTED: sugar transporter ERD6-like 5, partial [Fragaria vesca subsp. vesca]	gi|470138579|ref|XM_004304985.1|/1e-136/PREDICTED: Fragaria vesca subsp. vesca uncharacterized LOC101307612 (LOC101307612), mRNA	sp|Q94KE0|ERDL3_ARATH/3e-26/Sugar transporter ERD6-like 3 OS=Arabidopsis thaliana GN=SUGTL2 PE=2 SV=1	fve:101307612/6e-48/sugar transporter ERD6-like 17; K08145 MFS transporter, SP family, solute carrier family 2 (facilitated glucose transporter), member 8	NA	PTHR24063/9.0E-25/--	NA
CL6671.Contig1_All	1017	1.07646	3.34e-06	Up	gi|470129578|ref|XP_004300687.1|/2.1286e-94/PREDICTED: uncharacterized protein LOC101301013 [Fragaria vesca subsp. vesca]	gi|470129577|ref|XM_004300639.1|/0.0/PREDICTED: Fragaria vesca subsp. vesca uncharacterized LOC101301013 (LOC101301013), mRNA	NA	NA	NA	PTHR31769:SF6/1.4E-50/--	cellular_component:GO:0016020//membrane;
CL6759.Contig1_All	1613	2.37844	9.15e-10	Up	gi|470126024|ref|XP_004298995.1|/6.59016e-129/PREDICTED: sufE-like protein 2, chloroplastic [Fragaria vesca subsp. vesca]	gi|470126023|ref|XM_004298947.1|/0.0/PREDICTED: Fragaria vesca subsp. vesca sufE-like protein, chloroplastic-like (LOC101292408), mRNA	sp|Q9FXE3|SUFE2_ARATH/4e-51/SufE-like protein 2, chloroplastic OS=Arabidopsis thaliana GN=SUFE2 PE=2 SV=1	vvi:100243361/1e-47/quinolinate synthase, chloroplastic; K03517 quinolinate synthase [EC:2.5.1.72]	alr3513/4e-14/---	PTHR12735/6.5E-27/--	biological_process:GO:0051176//positive regulation of sulfur metabolic process;GO:0043085//positive regulation of catalytic activity;cellular_component:GO:0009507//chloroplast;molecular_function:GO:0008047//enzyme activator activity;
CL5850.Contig2_All	1909	1.222	4.09e-07	Up	gi|470128850|ref|XP_004300346.1|/0/PREDICTED: polycomb group protein EMBRYONIC FLOWER 2 isoform X1 [Fragaria vesca subsp. vesca] &gt;gi|764591330|ref|XP_011465243.1| PREDICTED: polycomb group protein EMBRYONIC FLOWER 2 isoform X1 [Fragaria vesca subsp. vesca] &gt;gi|764591338|ref|XP_011465245.1| PREDICTED: polycomb group protein EMBRYONIC FLOWER 2 isoform X1 [Fragaria vesca subsp. vesca]	gi|470128849|ref|XM_004300298.1|/0.0/PREDICTED: Fragaria vesca subsp. vesca polycomb group protein EMBRYONIC FLOWER 2-like (LOC101291339), mRNA	sp|Q8W5B1|VRN2_ARATH/9e-114/Polycomb group protein VERNALIZATION 2 OS=Arabidopsis thaliana GN=VRN2 PE=1 SV=2	bna:106418081/2e-60/polycomb group protein VERNALIZATION 2-like; K11463 polycomb protein SUZ12	NA	PTHR22597:SF0/4.0E-93/--	NA
Unigene6099_All	1760	4.69692	1.06e-61	Up	gi|764553476|ref|XP_011460402.1|/3.91361e-70/PREDICTED: uncharacterized protein LOC101293467 [Fragaria vesca subsp. vesca]	gi|470140046|ref|XM_004305708.1|/2e-62/PREDICTED: Fragaria vesca subsp. vesca uncharacterized LOC101311600 (LOC101311600), mRNA	NA	NA	NA	NA	NA
Unigene1717_All	734	2.34124	0.00110171	Up	NA	NA	NA	NA	NA	NA	NA
Unigene9073_All	1242	-1.04377	4.8e-79	Down	gi|764572143|ref|XP_011462742.1|/4.29003e-151/PREDICTED: ethylene-responsive transcription factor RAP2-3 [Fragaria vesca subsp. vesca]	gi|470121638|ref|XM_004296822.1|/0.0/PREDICTED: Fragaria vesca subsp. vesca ethylene-responsive transcription factor RAP2-3-like (LOC101293287), mRNA	sp|P42736|RAP23_ARATH/2e-44/Ethylene-responsive transcription factor RAP2-3 OS=Arabidopsis thaliana GN=RAP2-3 PE=1 SV=2	fve:101293287/8e-152/ethylene-responsive transcription factor RAP2-3; K09286 EREBP-like factor	NA	PS51032/23.354/AP2/ERF domain profile.	NA
CL5279.Contig1_All	1180	5.36941	1.41e-59	Up	gi|470102400|ref|XP_004287642.1|/4.77616e-112/PREDICTED: protein LURP-one-related 6 [Fragaria vesca subsp. vesca]	gi|470102399|ref|XM_004287594.1|/0.0/PREDICTED: Fragaria vesca subsp. vesca protein LURP-one-related 6-like (LOC101298248), mRNA	sp|Q9ZUF7|LOR6_ARATH/5e-63/Protein LURP-one-related 6 OS=Arabidopsis thaliana GN=At2g05910 PE=2 SV=1	rcu:8276560/1e-06/methylthioribose-1-phosphate isomerase; K03239 translation initiation factor eIF-2B subunit alpha	NA	PF04525/2.8E-42/Tubby C 2	NA
CL1309.Contig1_All	753	2.6547	2.23e-08	Up	gi|470111267|ref|XP_004291870.1|/4.23798e-50/PREDICTED: protein RADIALIS-like 5 [Fragaria vesca subsp. vesca]	gi|470111266|ref|XM_004291822.1|/1e-163/PREDICTED: Fragaria vesca subsp. vesca protein RADIALIS-like 6-like (LOC101297214), mRNA	sp|Q8GW75|RADL5_ARATH/4e-33/Protein RADIALIS-like 5 OS=Arabidopsis thaliana GN=RL5 PE=3 SV=1	NA	NA	PTHR25040:SF70/1.3E-21/--	cellular_component:GO:0005634//nucleus;molecular_function:GO:0003677//DNA binding;
Unigene18907_All	1379	-5.75523	1.14e-78	Down	gi|470132490|ref|XP_004302114.1|/0/PREDICTED: GDSL esterase/lipase At5g33370-like [Fragaria vesca subsp. vesca]	gi|470132489|ref|XM_004302066.1|/0.0/PREDICTED: Fragaria vesca subsp. vesca GDSL esterase/lipase At5g33370-like (LOC101299202), mRNA	sp|Q8LB81|GDL79_ARATH/4e-166/GDSL esterase/lipase At5g33370 OS=Arabidopsis thaliana GN=At5g33370 PE=2 SV=1	atr:18422248/4e-49/geranylgeranyl diphosphate reductase, chloroplastic; K10960 geranylgeranyl reductase [EC:1.3.1.83]	all3634/3e-15/---	PTHR22835:SF142/4.9E-207/--	molecular_function:GO:0016788//hydrolase activity, acting on ester bonds;
Unigene2903_All	1936	1.0709	1.83e-09	Up	gi|470125521|ref|XP_004298750.1|/8.05969e-63/PREDICTED: cytochrome P450 87A3-like [Fragaria vesca subsp. vesca]	gi|470129725|ref|XM_004300711.1|/0.0/PREDICTED: Fragaria vesca subsp. vesca protein HAPLESS 2-like (LOC101299771), mRNA	sp|Q7XU38|C87A3_ORYSJ/6e-30/Cytochrome P450 87A3 OS=Oryza sativa subsp. japonica GN=CYP87A3 PE=2 SV=3	fve:101292018/1e-63/cytochrome P450 87A3-like; K07437 cytochrome P450, family 26, subfamily A	NA	NA	cellular_component:GO:0016021//integral component of membrane;
Unigene11298_All	1550	-3.63516	0	Down	gi|470118406|ref|XP_004295322.1|/0/PREDICTED: probable pectate lyase 5 [Fragaria vesca subsp. vesca]	gi|470118405|ref|XM_004295274.1|/0.0/PREDICTED: Fragaria vesca subsp. vesca probable pectate lyase 15-like (LOC101314448), mRNA	sp|Q944R1|PLY15_ARATH/5e-142/Probable pectate lyase 15 OS=Arabidopsis thaliana GN=At4g13710 PE=2 SV=1	fve:101314448/0.0/probable pectate lyase 5; K01728 pectate lyase [EC:4.2.2.2]	TM0433/3e-17/---	PF00544/1.7E-58/Pectate lyase	NA
Unigene16950_All	1104	4.15403	4.91e-23	Up	gi|470141094|ref|XP_004306270.1|/2.35219e-174/PREDICTED: expansin-A9-like [Fragaria vesca subsp. vesca]	gi|470141093|ref|XM_004306222.1|/0.0/PREDICTED: Fragaria vesca subsp. vesca expansin-A32-like (LOC101295072), mRNA	sp|Q6YYW5|EXP32_ORYSJ/3e-89/Expansin-A32 OS=Oryza sativa subsp. japonica GN=EXPA32 PE=2 SV=1	NA	NA	PF03330/3.5E-20/Rare lipoprotein A (RlpA)-like double-psi beta-barrel	biological_process:GO:0009664//plant-type cell wall organization;cellular_component:GO:0016020//membrane;GO:0005618//cell wall;GO:0005576//extracellular region;
CL5304.Contig4_All	1526	-2.70827	0.00050098	Down	gi|470123767|ref|XP_004297892.1|/0/PREDICTED: uncharacterized protein LOC101298310 [Fragaria vesca subsp. vesca] &gt;gi|764568737|ref|XP_011462351.1| PREDICTED: uncharacterized protein LOC101298310 [Fragaria vesca subsp. vesca]	gi|470123766|ref|XM_004297844.1|/0.0/PREDICTED: Fragaria vesca subsp. vesca uncharacterized LOC101298310 (LOC101298310), mRNA	NA	NA	NA	PTHR21450/5.1E-183/--	NA
CL3293.Contig3_All	889	-2.27165	0.00113652	Down	gi|764517516|ref|XP_004289409.2|/1.36837e-83/PREDICTED: probable Histone-lysine N-methyltransferase ATXR5 [Fragaria vesca subsp. vesca]	gi|470106090|ref|XM_004289361.1|/0.0/PREDICTED: Fragaria vesca subsp. vesca histone-lysine N-methyltransferase ATXR5-like (LOC101315097), mRNA	sp|B9RU15|ATXR5_RICCO/6e-73/Probable Histone-lysine N-methyltransferase ATXR5 OS=Ricinus communis GN=ATXR5 PE=1 SV=1	sita:101765476/2e-07/histone-lysine N-methyltransferase ASHH3-like; K11423 histone-lysine N-methyltransferase SETD2 [EC:2.1.1.43]	NA	PS50280/12.959/SET domain profile.	cellular_component:GO:0016021//integral component of membrane;molecular_function:GO:0008270//zinc ion binding;
CL4403.Contig5_All	1070	3.94527	5.39e-08	Up	gi|470120514|ref|XP_004296345.1|/3.83504e-113/PREDICTED: putative lysine-specific demethylase JMJD5 [Fragaria vesca subsp. vesca]	gi|470120513|ref|XM_004296297.1|/0.0/PREDICTED: Fragaria vesca subsp. vesca lysine-specific demethylase 8-like (LOC101301573), mRNA	NA	tcc:TCM_040527/2e-92/2-oxoglutarate (2OG) and Fe(II)-dependent oxygenase superfamily protein isoform 1; K10277 lysine-specific demethylase 8 [EC:1.14.11.27]	NA	PS51184/28.4/JmjC domain profile.	biological_process:GO:0042752//regulation of circadian rhythm;GO:0010452//histone H3-K36 methylation;GO:0006355//regulation of transcription, DNA-templated;GO:0070544//histone H3-K36 demethylation;molecular_function:GO:0046975//histone methyltransferase activity (H3-K36 specific);GO:0003700//transcription factor activity, sequence-specific DNA binding;
CL8655.Contig22_All	4219	1.59617	5.96e-05	Up	NA	gi|470128837|ref|XR_184739.1|/3e-41/PREDICTED: Fragaria vesca subsp. vesca uncharacterized LOC101314377 (LOC101314377), misc_RNA	NA	NA	NA	NA	NA
CL2432.Contig2_All	2694	1.04157	0.00224062	Up	gi|470106441|ref|XP_004289580.1|/0/PREDICTED: DEAD-box ATP-dependent RNA helicase 13 [Fragaria vesca subsp. vesca]	gi|470106440|ref|XM_004289532.1|/0.0/PREDICTED: Fragaria vesca subsp. vesca DEAD-box ATP-dependent RNA helicase 13-like (LOC101306385), mRNA	sp|Q93Y39|RH13_ARATH/0.0/DEAD-box ATP-dependent RNA helicase 13 OS=Arabidopsis thaliana GN=RH13 PE=2 SV=3	fve:101306385/0.0/DEAD-box ATP-dependent RNA helicase 13; K14805 ATP-dependent RNA helicase DDX24/MAK5 [EC:3.6.4.13]	YBR142w/3e-69/---	PTHR24031:SF91/4.3E-198/--	molecular_function:GO:0005524//ATP binding;GO:0004386//helicase activity;GO:0003676//nucleic acid binding;
CL6515.Contig1_All	1820	5.12211	4.15e-173	Up	gi|764553615|ref|XP_004295442.2|/0/PREDICTED: reticuline oxidase-like protein [Fragaria vesca subsp. vesca]	gi|470118663|ref|XM_004295394.1|/0.0/PREDICTED: Fragaria vesca subsp. vesca reticuline oxidase-like protein-like (LOC101309917), mRNA	sp|Q9SVG4|RETOL_ARATH/4e-145/Reticuline oxidase-like protein OS=Arabidopsis thaliana GN=At4g20830 PE=1 SV=2	mtr:MTR_4g044110/1e-08/cytokinin oxidase/dehydrogenase-like protein; K00279 cytokinin dehydrogenase [EC:1.5.99.12]	BS_yvdP/2e-33/---	PS51387/19.342/PCMH-type FAD-binding domain profile.	biological_process:GO:0055114//oxidation-reduction process;molecular_function:GO:0016614//oxidoreductase activity, acting on CH-OH group of donors;GO:0050660//flavin adenine dinucleotide binding;
CL693.Contig2_All	990	-1.1213	9.97e-06	Down	gi|470133795|ref|XP_004302745.1|/2.1021e-99/PREDICTED: short-chain dehydrogenase TIC 32, chloroplastic [Fragaria vesca subsp. vesca]	gi|470133794|ref|XM_004302697.1|/0.0/PREDICTED: Fragaria vesca subsp. vesca short-chain dehydrogenase TIC 32, chloroplastic-like (LOC101295243), mRNA	sp|Q6RVV4|TIC32_PEA/2e-52/Short-chain dehydrogenase TIC 32, chloroplastic OS=Pisum sativum GN=TIC32 PE=1 SV=1	mdm:103427570/4e-84/short-chain dehydrogenase TIC 32, chloroplastic-like; K11153 retinol dehydrogenase 12 [EC:1.1.1.300]	CC0398/3e-17/---	PTHR24320:SF44/4.1E-117/--	NA
CL8781.Contig3_All	895	1.23232	1.12e-47	Up	gi|764597353|ref|XP_011466165.1|/1.08725e-72/PREDICTED: F-box protein PP2-B15-like isoform X1 [Fragaria vesca subsp. vesca]	gi|470138266|ref|XM_004304831.1|/0.0/PREDICTED: Fragaria vesca subsp. vesca F-box protein PP2-B15-like (LOC101305495), mRNA	sp|O80494|P2B15_ARATH/2e-25/F-box protein PP2-B15 OS=Arabidopsis thaliana GN=PP2B15 PE=2 SV=2	mdm:103427772/2e-09/protein LUTEIN DEFICIENT 5, chloroplastic-like; K15747 beta-ring hydroxylase [EC:1.14.-.-]	NA	PF14299/1.4E-43/Phloem protein 2	NA
Unigene10929_All	894	-7.2206	1.58e-112	Down	gi|91177936|gb|ABE27180.1|/1.16273e-50/S-locus S-RNase c [Prunus armeniaca]	gi|158392764|dbj|AB364466.1|/1e-06/Prunus mume S-RNase gene for S-ribonuclease, partial cds, allele: S5	sp|Q40965|RNS2_PYRPY/8e-23/Ribonuclease S-2 OS=Pyrus pyrifolia PE=1 SV=1	pmum:103343622/1e-47/ribonuclease MC-like; K01166 ribonuclease T2 [EC:3.1.27.1]	BMEI1247/1e-06/---	PS00530/-/Ribonuclease T2 family histidine active site 1.	NA
CL6883.Contig1_All	1555	2.2047	0.00413386	Up	gi|470121071|ref|XP_004296607.1|/3.69711e-113/PREDICTED: actin-related protein 9 [Fragaria vesca subsp. vesca]	gi|470121070|ref|XM_004296559.1|/0.0/PREDICTED: Fragaria vesca subsp. vesca actin-related protein 9-like (LOC101307003), mRNA	sp|Q0JF03|ARP9_ORYSJ/8e-70/Actin-related protein 9 OS=Oryza sativa subsp. japonica GN=ARP9 PE=2 SV=1	fve:101307003/7e-114/actin-related protein 9; K11673 actin-related protein 8	SPAC664.02c/6e-06/---	PTHR11937/3.1E-28/--	biological_process:GO:0006338//chromatin remodeling;cellular_component:GO:0031011//Ino80 complex;
Unigene4064_All	934	-1.31571	1.48e-170	Down	gi|470121272|ref|XP_004296700.1|/1.48933e-51/PREDICTED: putative lipid-transfer protein DIR1 [Fragaria vesca subsp. vesca]	gi|116631886|emb|CT831690.1|/7e-08/Oryza sativa (indica cultivar-group) cDNA clone:OSIGCSA047K18, full insert sequence	sp|Q40227|LIM3_LILLO/2e-08/Protein LIM3 OS=Lilium longiflorum GN=LIM3 PE=3 SV=2	NA	NA	PF14368/8.9E-12/Probable lipid transfer	NA
CL1691.Contig6_All	753	-1.67577	0	Down	gi|470137664|ref|XP_004304583.1|/5.32389e-69/PREDICTED: uncharacterized protein LOC101308784 [Fragaria vesca subsp. vesca]	gi|470137663|ref|XM_004304535.1|/0.0/PREDICTED: Fragaria vesca subsp. vesca uncharacterized LOC101308784, transcript variant 1 (LOC101308784), mRNA	NA	NA	NA	NA	NA
Unigene16714_All	762	3.50027	7.88e-14	Up	gi|470147037|ref|XP_004309123.1|/1.49473e-82/PREDICTED: uncharacterized protein LOC101312012 [Fragaria vesca subsp. vesca]	gi|470147036|ref|XM_004309075.1|/0.0/PREDICTED: Fragaria vesca subsp. vesca uncharacterized LOC101312012 (LOC101312012), mRNA	NA	mdm:103431243/3e-08/surfeit locus protein 1-like; K14998 surfeit locus 1 family protein	NA	PF14368/2.8E-8/Probable lipid transfer	NA
CL4625.Contig3_All	3691	1.05289	7.42e-20	Up	gi|764539600|ref|XP_004291202.2|/0/PREDICTED: myb-related protein 3R-1 [Fragaria vesca subsp. vesca]	gi|470109852|ref|XM_004291154.1|/0.0/PREDICTED: Fragaria vesca subsp. vesca myb-related protein 3R-1-like (LOC101309504), partial mRNA	sp|Q9S7G7|MB3R1_ARATH/2e-169/Myb-related protein 3R-1 OS=Arabidopsis thaliana GN=MYB3R-1 PE=2 SV=1	fve:101309504/0.0/myb-related protein 3R-1; K09420 myb proto-oncogene protein	ECU11g1690/1e-35/---	PTHR10641/8.8E-122/--	NA
CL2313.Contig6_All	1132	1.58158	0.00331134	Up	gi|764581855|ref|XP_011464055.1|/8.94326e-90/PREDICTED: 2-phytyl-1,4-beta-naphthoquinone methyltransferase, chloroplastic isoform X1 [Fragaria vesca subsp. vesca]	gi|470130071|ref|XM_004300882.1|/0.0/PREDICTED: Fragaria vesca subsp. vesca 2-phytyl-1,4-beta-naphthoquinone methyltransferase, chloroplastic-like (LOC101304776), mRNA	sp|Q3ED65|MENG_ARATH/4e-62/2-phytyl-1,4-beta-naphthoquinone methyltransferase, chloroplastic OS=Arabidopsis thaliana GN=MENG PE=1 SV=2	fve:101294364/2e-90/2-phytyl-1,4-beta-naphthoquinone methyltransferase, chloroplastic-like; K03183 demethylmenaquinone methyltransferase / 2-methoxy-6-polyprenyl-1,4-benzoquinol methylase [EC:2.1.1.163 2.1.1.201]	alr5252/3e-37/---	PTHR10108:SF701/1.1E-25/--	NA
CL1037.Contig5_All	3907	1.03135	0.00165734	Up	gi|470142584|ref|XP_004306984.1|/0/PREDICTED: glycine--tRNA ligase 2, chloroplastic/mitochondrial [Fragaria vesca subsp. vesca]	gi|470142583|ref|XM_004306936.1|/0.0/PREDICTED: Fragaria vesca subsp. vesca glycine--tRNA ligase 2, chloroplastic/mitochondrial-like (LOC101314215), mRNA	sp|Q8L785|SYGM2_ARATH/0.0/Glycine--tRNA ligase 2, chloroplastic/mitochondrial OS=Arabidopsis thaliana GN=GLYRS-2 PE=2 SV=1	fve:101314215/0.0/glycine--tRNA ligase 2, chloroplastic/mitochondrial; K14164 glycyl-tRNA synthetase [EC:6.1.1.14]	BH1371/4e-107/---	PR01044/2.0E-57/Glycyl-tRNA synthetase alpha subunit signature	biological_process:GO:0006426//glycyl-tRNA aminoacylation;cellular_component:GO:0005737//cytoplasm;molecular_function:GO:0004820//glycine-tRNA ligase activity;GO:0005524//ATP binding;
Unigene14188_All	799	3.82714	4.16e-21	Up	gi|470146773|ref|XP_004308996.1|/2.49884e-75/PREDICTED: thioredoxin H9 [Fragaria vesca subsp. vesca]	gi|470146772|ref|XM_004308948.1|/0.0/PREDICTED: Fragaria vesca subsp. vesca thioredoxin H9-like (LOC101292650), mRNA	sp|Q9C9Y6|TRXH9_ARATH/5e-38/Thioredoxin H9 OS=Arabidopsis thaliana GN=TRX9 PE=1 SV=1	fve:101292650/5e-76/thioredoxin H9; K03671 thioredoxin 1	SPAC7D4.07c/6e-14/---	PF00085/2.1E-22/Thioredoxin	NA
CL9001.Contig5_All	3178	1.11008	1.24e-06	Up	gi|764552854|ref|XP_011460335.1|/0/PREDICTED: G-type lectin S-receptor-like serine/threonine-protein kinase At1g61500 [Fragaria vesca subsp. vesca]	gi|470118531|ref|XM_004295333.1|/0.0/PREDICTED: Fragaria vesca subsp. vesca uncharacterized LOC101311743 (LOC101311743), mRNA	sp|Q8RY46|AB26B_ARATH/7e-180/ABC transporter B family member 26, chloroplastic OS=Arabidopsis thaliana GN=ABCB26 PE=2 SV=1	cit:102618671/0.0/ABC transporter B family member 26, chloroplastic-like; K05656 ATP-binding cassette, subfamily B (MDR/TAP), member 9	BMEI0323/3e-55/---	SM00108/2.8E-42/Bulb-type mannose-specific lectin	NA
CL3369.Contig1_All	962	1.03047	3.51e-07	Up	gi|764618808|ref|XP_011468287.1|/1.49667e-171/PREDICTED: J protein JJJ1-like [Fragaria vesca subsp. vesca]	gi|470141272|ref|XM_004306311.1|/0.0/PREDICTED: Fragaria vesca subsp. vesca uncharacterized LOC101298739 (LOC101298739), mRNA	sp|Q6XL73|DNJ39_ARATH/3e-07/Chaperone protein dnaJ 39 OS=Arabidopsis thaliana GN=ATJ39 PE=2 SV=2	bna:106435955/4e-08/chaperone protein DnaJ-like; K03686 molecular chaperone DnaJ	alr0045/1e-14/---	PR00625/3.4E-6/DnaJ domain signature	NA
CL8119.Contig2_All	703	2.31569	1.58e-05	Up	gi|470122864|ref|XP_004297458.1|/4.82402e-73/PREDICTED: protein PLANT CADMIUM RESISTANCE 2-like [Fragaria vesca subsp. vesca]	gi|470122863|ref|XM_004297410.1|/0.0/PREDICTED: Fragaria vesca subsp. vesca protein PLANT CADMIUM RESISTANCE 2-like (LOC101301187), mRNA	sp|Q9LQU4|PCR2_ARATH/2e-46/Protein PLANT CADMIUM RESISTANCE 2 OS=Arabidopsis thaliana GN=PCR2 PE=1 SV=1	tcc:TCM_045610/4e-17/Sec23/Sec24 protein transport family protein isoform 1; K14006 protein transport protein SEC23	NA	PF04749/2.9E-35/PLAC8 family	NA
CL5201.Contig4_All	3803	-1.50717	4e-07	Down	gi|470101239|ref|XP_004287084.1|/0/PREDICTED: leucine-rich repeat extensin-like protein 4 [Fragaria vesca subsp. vesca]	gi|470101238|ref|XM_004287036.1|/0.0/PREDICTED: Fragaria vesca subsp. vesca leucine-rich repeat extensin-like protein 4-like (LOC101299114), mRNA	sp|Q9T0K5|LRX3_ARATH/0.0/Leucine-rich repeat extensin-like protein 3 OS=Arabidopsis thaliana GN=LRX3 PE=1 SV=1	aip:107619883/1e-90/formin-like protein 20; K02184 formin 2	XF0818/2e-36/---	PF08263/1.2E-5/Leucine rich repeat N-terminal domain	NA
CL9413.Contig1_All	1252	2.24005	0.00227781	Up	gi|764584244|ref|XP_011464379.1|/0/PREDICTED: ABC transporter A family member 2 [Fragaria vesca subsp. vesca]	gi|470130539|ref|XM_004301113.1|/0.0/PREDICTED: Fragaria vesca subsp. vesca ABC transporter A family member 2-like (LOC101313221), mRNA	sp|Q84K47|AB2A_ARATH/4e-159/ABC transporter A family member 2 OS=Arabidopsis thaliana GN=ABCA2 PE=2 SV=1	ppp:PHYPADRAFT_234064/2e-63/ppabca7; ATP-binding cassette transporter, subfamily A, member 7, group AOH protein PpABCA7; K05643 ATP-binding cassette, subfamily A (ABC1), member 3	BS_yfiL/5e-37/---	PF00005/4.0E-23/ABC transporter	biological_process:GO:0006810//transport;cellular_component:GO:0016021//integral component of membrane;molecular_function:GO:0005524//ATP binding;GO:0005215//transporter activity;GO:0016887//ATPase activity;
Unigene19847_All	1172	1.38328	0.00213735	Up	gi|764618420|ref|XP_004306333.2|/6.9553e-55/PREDICTED: protease Do-like 9 [Fragaria vesca subsp. vesca]	gi|470141219|ref|XM_004306285.1|/1e-167/PREDICTED: Fragaria vesca subsp. vesca protease Do-like 9-like (LOC101315080), mRNA	sp|Q9FL12|DEGP9_ARATH/1e-47/Protease Do-like 9 OS=Arabidopsis thaliana GN=DEGP9 PE=1 SV=1	aip:107643629/8e-28/protease Do-like 9; K12614 ATP-dependent RNA helicase DDX6/DHH1 [EC:3.6.4.13]	NA	PTHR22939/2.9E-72/--	biological_process:GO:0006508//proteolysis;molecular_function:GO:0004252//serine-type endopeptidase activity;
Unigene23664_All	703	1.72871	0.00415122	Up	NA	NA	NA	NA	NA	NA	NA
Unigene18004_All	1439	1.56264	0.000651773	Up	gi|764631064|ref|XP_011469606.1|/0/PREDICTED: zinc finger protein ZAT5-like [Fragaria vesca subsp. vesca]	gi|225448915|ref|XM_002265841.1|/5e-13/PREDICTED: Vitis vinifera zinc finger protein ZAT5-like (LOC100254652), mRNA	sp|Q681X4|ZAT5_ARATH/1e-44/Zinc finger protein ZAT5 OS=Arabidopsis thaliana GN=ZAT5 PE=2 SV=1	bvg:104901000/4e-06/calcium-dependent protein kinase 2-like; K13412 calcium-dependent protein kinase [EC:2.7.11.1]	YMR043w/7e-06/---	PS00028/-/Zinc finger C2H2 type domain signature.	NA
Unigene12115_All	355	-2.23401	0.00414946	Down	NA	NA	NA	NA	NA	NA	NA
Unigene5690_All	3064	-1.67489	1.36e-07	Down	gi|470138290|ref|XP_004304890.1|/2.87599e-30/PREDICTED: F-box/kelch-repeat protein At3g06240-like [Fragaria vesca subsp. vesca]	gi|470129933|ref|XM_004300814.1|/2e-10/PREDICTED: Fragaria vesca subsp. vesca uncharacterized LOC101307215 (LOC101307215), mRNA	NA	NA	NA	NA	NA
CL3829.Contig1_All	1458	-2.06964	1.72e-08	Down	gi|764555466|ref|XP_004295563.2|/0/PREDICTED: WUSCHEL-related homeobox 9 [Fragaria vesca subsp. vesca]	gi|470118911|ref|XM_004295515.1|/0.0/PREDICTED: Fragaria vesca subsp. vesca WUSCHEL-related homeobox 9-like (LOC101305645), mRNA	sp|Q6X7J4|WOX9_ARATH/9e-82/WUSCHEL-related homeobox 9 OS=Arabidopsis thaliana GN=WOX9 PE=2 SV=1	pda:103701110/8e-21/WUSCHEL-related homeobox 6-like; K18490 homeobox protein OTX2	NA	PF00046/5.3E-15/Homeobox domain	NA
CL4945.Contig2_All	2039	1.34204	0.00107871	Up	gi|470136252|ref|XP_004303910.1|/0/PREDICTED: vacuolar cation/proton exchanger 3-like [Fragaria vesca subsp. vesca] &gt;gi|764611856|ref|XP_011467631.1| PREDICTED: vacuolar cation/proton exchanger 3-like [Fragaria vesca subsp. vesca]	gi|470136251|ref|XM_004303862.1|/0.0/PREDICTED: Fragaria vesca subsp. vesca vacuolar cation/proton exchanger 2-like (LOC101295731), mRNA	sp|Q5KQN0|CAX2_ORYSJ/2e-164/Vacuolar cation/proton exchanger 2 OS=Oryza sativa subsp. japonica GN=CAX2 PE=2 SV=2	fve:101295731/0.0/vacuolar cation/proton exchanger 3-like; K07300 Ca2+:H+ antiporter	YDL128w/3e-77/---	PF01699/1.1E-24/Sodium/calcium exchanger protein	biological_process:GO:0070588//calcium ion transmembrane transport;cellular_component:GO:0016021//integral component of membrane;molecular_function:GO:0015369//calcium:proton antiporter activity;
CL3711.Contig9_All	2195	2.00096	1.1e-25	Up	gi|764528328|ref|XP_011458110.1|/0/PREDICTED: 3-hydroxy-3-methylglutaryl-coenzyme A reductase 1-like [Fragaria vesca subsp. vesca]	gi|470107509|ref|XM_004290040.1|/0.0/PREDICTED: Fragaria vesca subsp. vesca 3-hydroxy-3-methylglutaryl-coenzyme A reductase 2-like (LOC101308137), mRNA	sp|O64967|HMDH2_GOSHI/0.0/3-hydroxy-3-methylglutaryl-coenzyme A reductase 2 OS=Gossypium hirsutum GN=HMG2 PE=3 SV=1	fve:101308137/0.0/3-hydroxy-3-methylglutaryl-coenzyme A reductase 1-like; K00021 hydroxymethylglutaryl-CoA reductase (NADPH) [EC:1.1.1.34]	YML075c/2e-134/---	PS50065/141.429/Hydroxymethylglutaryl-coenzyme A reductases family profile.	NA
CL4096.Contig4_All	1632	-2.63805	0	Down	gi|470132909|ref|XP_004302317.1|/2.62973e-109/PREDICTED: uncharacterized protein LOC101311974 isoform X3 [Fragaria vesca subsp. vesca]	gi|470132908|ref|XM_004302269.1|/0.0/PREDICTED: Fragaria vesca subsp. vesca uncharacterized LOC101311974, transcript variant 2 (LOC101311974), mRNA	NA	NA	NA	NA	NA
CL6154.Contig4_All	1333	1.9115	0.00110972	Up	gi|764565392|ref|XP_011461804.1|/1.35512e-142/PREDICTED: uncharacterized protein LOC101308361 isoform X2 [Fragaria vesca subsp. vesca]	gi|470118059|ref|XM_004295113.1|/0.0/PREDICTED: Fragaria vesca subsp. vesca uncharacterized LOC101308361 (LOC101308361), mRNA	NA	ppp:PHYPADRAFT_92690/6e-17/hypothetical protein; K13172 serine/arginine repetitive matrix protein 2	NA	NA	NA
Unigene8372_All	1988	4.49164	3.38e-61	Up	gi|470138066|ref|XP_004304780.1|/0/PREDICTED: uncharacterized protein LOC101296310 [Fragaria vesca subsp. vesca]	gi|470138065|ref|XM_004304732.1|/0.0/PREDICTED: Fragaria vesca subsp. vesca uncharacterized LOC101296310 (LOC101296310), mRNA	NA	aip:107644408/3e-27/probable lactoylglutathione lyase, chloroplastic; K01759 lactoylglutathione lyase [EC:4.4.1.5]	NA	PTHR32246/5.6E-67/--	NA
Unigene18250_All	569	-2.30371	5.24e-20	Down	NA	NA	NA	NA	NA	NA	NA
Unigene11255_All	599	1.219	0.00187107	Up	gi|802615639|ref|XP_012075279.1|/2.66132e-10/PREDICTED: uncharacterized protein LOC105636578 [Jatropha curcas] &gt;gi|643726611|gb|KDP35291.1| hypothetical protein JCGZ_09450 [Jatropha curcas]	gi|470103314|ref|XR_183726.1|/0.0/PREDICTED: Fragaria vesca subsp. vesca uncharacterized LOC101310740 (LOC101310740), misc_RNA	NA	NA	NA	NA	NA
CL1172.Contig2_All	2650	-1.02637	0.00147821	Down	gi|645220442|ref|XP_008240299.1|/0/PREDICTED: putative receptor protein kinase ZmPK1 [Prunus mume]	gi|50234591|gb|AY645718.1|/1e-132/Prunus persica S-locus-like receptor protein kinase (srkl1) mRNA, partial cds	sp|O64477|Y2913_ARATH/1e-105/G-type lectin S-receptor-like serine/threonine-protein kinase At2g19130 OS=Arabidopsis thaliana GN=At2g19130 PE=2 SV=1	sly:101254423/5e-86/uncharacterized LOC101254423; K00276 primary-amine oxidase [EC:1.4.3.21]	YAR019c/7e-19/---	PF01453/5.8E-23/D-mannose binding lectin	biological_process:GO:0006468//protein phosphorylation;GO:0048544//recognition of pollen;cellular_component:GO:0016021//integral component of membrane;molecular_function:GO:0004674//protein serine/threonine kinase activity;GO:0005524//ATP binding;
Unigene49_All	594	-2.30006	1.82e-13	Down	gi|747067152|ref|XP_011080281.1|/5.57133e-130/PREDICTED: extensin-2-like [Sesamum indicum]	gi|470125116|ref|XR_184594.1|/1e-152/PREDICTED: Fragaria vesca subsp. vesca uncharacterized LOC101295621 (LOC101295621), misc_RNA	sp|Q9M1G9|EXTN2_ARATH/5e-82/Extensin-2 OS=Arabidopsis thaliana GN=EXT2 PE=2 SV=1	sind:105163614/2e-71/extensin-2-like; K05747 Wiskott-Aldrich syndrome protein	XF0818/3e-30/---	PR01217/5.6E-11/Proline rich extensin signature	NA
Unigene13147_All	1950	1.64628	5.1e-23	Up	gi|470119043|ref|XP_004295627.1|/0/PREDICTED: phenylalanine N-monooxygenase-like [Fragaria vesca subsp. vesca]	gi|470119042|ref|XM_004295579.1|/0.0/PREDICTED: Fragaria vesca subsp. vesca isoleucine N-monooxygenase 2-like (LOC101302920), mRNA	sp|Q6J540|C79D4_LOTJA/5e-162/Isoleucine N-monooxygenase 2 OS=Lotus japonicus GN=CYP79D4 PE=1 SV=1	fve:101302920/0.0/phenylalanine N-monooxygenase-like; K12153 phenylalanine N-monooxygenase [EC:1.14.13.124]	all1361/3e-15/---	PF00067/4.1E-75/Cytochrome P450	biological_process:GO:0055114//oxidation-reduction process;molecular_function:GO:0016705//oxidoreductase activity, acting on paired donors, with incorporation or reduction of molecular oxygen;GO:0020037//heme binding;GO:0005506//iron ion binding;GO:0004497//monooxygenase activity;
CL2104.Contig5_All	1645	-2.44962	0.00167089	Down	gi|470103842|ref|XP_004288336.1|/0/PREDICTED: uncharacterized protein At1g04910 isoform X1 [Fragaria vesca subsp. vesca]	gi|470103841|ref|XM_004288288.1|/0.0/PREDICTED: Fragaria vesca subsp. vesca uncharacterized LOC101314128 (LOC101314128), mRNA	sp|Q8W486|Y1491_ARATH/7e-64/Uncharacterized protein At1g04910 OS=Arabidopsis thaliana GN=At1g04910 PE=2 SV=1	mdm:103446271/9e-18/uncharacterized LOC103446271; K13506 glycerol-3-phosphate O-acyltransferase 3/4 [EC:2.3.1.15]	NA	PTHR31741:SF1/8.8E-274/--	cellular_component:GO:0005634//nucleus;GO:0016021//integral component of membrane;GO:0005737//cytoplasm;
CL1204.Contig3_All	1388	-2.70072	0.000518646	Down	gi|470104252|ref|XP_004288522.1|/0/PREDICTED: nucleobase-ascorbate transporter 11 [Fragaria vesca subsp. vesca]	gi|470104251|ref|XM_004288474.1|/0.0/PREDICTED: Fragaria vesca subsp. vesca nucleobase-ascorbate transporter 11-like (LOC101301720), mRNA	sp|Q6SZ87|NAT11_ARATH/2e-162/Nucleobase-ascorbate transporter 11 OS=Arabidopsis thaliana GN=NAT11 PE=2 SV=1	rcu:8263614/9e-171/nucleobase-ascorbate transporter 11; K14611 solute carrier family 23 (nucleobase transporter), member 1/2	PAB1838/3e-22/---	PTHR11119/1.1E-191/--	biological_process:GO:0055085//transmembrane transport;cellular_component:GO:0016021//integral component of membrane;molecular_function:GO:0005215//transporter activity;
CL5545.Contig2_All	2596	-1.68618	5.88e-06	Down	gi|470133609|ref|XP_004302658.1|/0/PREDICTED: BAHD acyltransferase DCR [Fragaria vesca subsp. vesca]	gi|470133608|ref|XM_004302610.1|/0.0/PREDICTED: Fragaria vesca subsp. vesca BAHD acyltransferase DCR-like (LOC101291444), mRNA	sp|Q9FF86|DCR_ARATH/1e-59/BAHD acyltransferase DCR OS=Arabidopsis thaliana GN=DCR PE=2 SV=1	cam:101495408/4e-72/BAHD acyltransferase DCR; K19747 BAHD acyltransferase [EC:2.3.1.-]	NA	PTHR31896/4.9E-262/--	molecular_function:GO:0016747//transferase activity, transferring acyl groups other than amino-acyl groups;
CL5420.Contig4_All	3992	1.32624	0.00197078	Up	gi|764611650|ref|XP_011467611.1|/0/PREDICTED: nuclear pore complex protein NUP205-like [Fragaria vesca subsp. vesca]	gi|470140235|ref|XM_004305799.1|/0.0/PREDICTED: Fragaria vesca subsp. vesca uncharacterized LOC101295739 (LOC101295739), mRNA	NA	fve:101295739/0.0/nuclear pore complex protein NUP205-like; K14310 nuclear pore complex protein Nup205	NA	PTHR31344/1.3E-83/--	NA
Unigene23463_All	1314	-1.50821	2.48e-41	Down	gi|470136149|ref|XP_004303860.1|/2.30223e-166/PREDICTED: xyloglucan endotransglucosylase/hydrolase 2-like [Fragaria vesca subsp. vesca]	gi|470136148|ref|XM_004303812.1|/0.0/PREDICTED: Fragaria vesca subsp. vesca probable xyloglucan endotransglucosylase/hydrolase protein 16-like (LOC101304400), mRNA	sp|Q8LG58|XTH16_ARATH/4e-114/Probable xyloglucan endotransglucosylase/hydrolase protein 16 OS=Arabidopsis thaliana GN=XTH16 PE=2 SV=2	fve:101304400/4e-167/xyloglucan endotransglucosylase/hydrolase 2-like; K08235 xyloglucan:xyloglucosyl transferase [EC:2.4.1.207]	YGR189c/1e-13/---	PF00722/4.7E-61/Glycosyl hydrolases family 16	biological_process:GO:0010411//xyloglucan metabolic process;GO:0042546//cell wall biogenesis;GO:0071555//cell wall organization;cellular_component:GO:0048046//apoplast;GO:0005618//cell wall;molecular_function:GO:0004553//hydrolase activity, hydrolyzing O-glycosyl compounds;GO:0016762//xyloglucan:xyloglucosyl transferase activity;
CL456.Contig1_All	2107	-1.19919	1.14e-25	Down	gi|470120989|ref|XP_004296568.1|/0/PREDICTED: senescence-associated carboxylesterase 101-like isoform X1 [Fragaria vesca subsp. vesca]	gi|470120988|ref|XM_004296520.1|/0.0/PREDICTED: Fragaria vesca subsp. vesca uncharacterized LOC101293969 (LOC101293969), mRNA	sp|Q4F883|SG101_ARATH/2e-83/Senescence-associated carboxylesterase 101 OS=Arabidopsis thaliana GN=SAG101 PE=1 SV=1	gmx:100820237/4e-26/protein EDS1L-like; K18875 enhanced disease susceptibility 1 protein	NA	PTHR21493/1.6E-13/--	NA
CL4225.Contig5_All	3817	1.03893	0.000222973	Up	gi|764545226|ref|XP_011459476.1|/0/PREDICTED: LOW QUALITY PROTEIN: replication factor C subunit 1 [Fragaria vesca subsp. vesca]	gi|470111023|ref|XR_184099.1|/0.0/PREDICTED: Fragaria vesca subsp. vesca replication factor C subunit 1-like (LOC101310667), misc_RNA	sp|Q9C587|RFC1_ARATH/0.0/Replication factor C subunit 1 OS=Arabidopsis thaliana GN=RFC1 PE=2 SV=1	fve:101310667/0.0/replication factor C subunit 1; K10754 replication factor C subunit 1	SPBC23E6.07c_2/6e-69/---	SM00292/5.1E-12/breast cancer carboxy-terminal domain	NA
CL3038.Contig2_All	1326	1.76102	1.44e-12	Up	gi|470102722|ref|XP_004287800.1|/0/PREDICTED: pectinesterase PPME1-like [Fragaria vesca subsp. vesca]	gi|470102721|ref|XM_004287752.1|/0.0/PREDICTED: Fragaria vesca subsp. vesca probable pectinesterase 48-like (LOC101296228), mRNA	sp|Q9LY19|PME48_ARATH/1e-112/Probable pectinesterase 48 OS=Arabidopsis thaliana GN=PME48 PE=2 SV=2	fve:101296228/0.0/pectinesterase PPME1-like; K01051 pectinesterase [EC:3.1.1.11]	CAC3373/2e-32/---	PTHR31321:SF8/4.5E-143/--	molecular_function:GO:0016788//hydrolase activity, acting on ester bonds;
Unigene3335_All	2472	1.20454	0.00176216	Up	gi|764526025|ref|XP_011457944.1|/0/PREDICTED: receptor-like cytosolic serine/threonine-protein kinase RBK1 isoform X4 [Fragaria vesca subsp. vesca]	gi|470107065|ref|XM_004289823.1|/0.0/PREDICTED: Fragaria vesca subsp. vesca probable receptor-like serine/threonine-protein kinase At5g57670-like (LOC101314234), mRNA	sp|Q5XF57|Y5576_ARATH/2e-64/Probable receptor-like serine/threonine-protein kinase At5g57670 OS=Arabidopsis thaliana GN=At5g57670 PE=2 SV=1	mdm:103400275/1e-95/uncharacterized LOC103400275; K04730 interleukin-1 receptor-associated kinase 1 [EC:2.7.11.1]	CAC0404_1/1e-17/---	PF00582/1.7E-7/Universal stress protein family	NA
CL7316.Contig2_All	2473	6.14941	2.98e-22	Up	gi|470122474|ref|XP_004297266.1|/0/PREDICTED: uncharacterized protein LOC101294649 isoform X1 [Fragaria vesca subsp. vesca]	gi|470122473|ref|XM_004297218.1|/0.0/PREDICTED: Fragaria vesca subsp. vesca uncharacterized LOC101294649 (LOC101294649), mRNA	sp|Q9M015|Y5161_ARATH/5e-41/Uncharacterized protein At5g01610 OS=Arabidopsis thaliana GN=At5g01610 PE=1 SV=1	NA	alr7352/1e-16/---	PTHR16255:SF6/6.6E-134/--	biological_process:GO:0010082//regulation of root meristem growth;GO:0032875//regulation of DNA endoreduplication;GO:0051302//regulation of cell division;cellular_component:GO:0005739//mitochondrion;
CL128.Contig1_All	484	2.3939	0.000265266	Up	NA	gi|371532603|gb|JQ041763.1|/1e-11/Pentactina rupicola chloroplast, complete genome	NA	NA	NA	NA	NA
Unigene9275_All	547	2.10588	0.00248512	Up	NA	NA	NA	NA	NA	NA	NA
CL4614.Contig2_All	2647	-1.44545	2.88e-51	Down	gi|470135541|ref|XP_004303572.1|/0/PREDICTED: uncharacterized aarF domain-containing protein kinase At1g79600, chloroplastic [Fragaria vesca subsp. vesca]	gi|470135540|ref|XM_004303524.1|/0.0/PREDICTED: Fragaria vesca subsp. vesca uncharacterized LOC101310138 (LOC101310138), mRNA	sp|Q9MA15|Y1796_ARATH/1e-64/Uncharacterized aarF domain-containing protein kinase At1g79600, chloroplastic OS=Arabidopsis thaliana GN=At1g79600 PE=2 SV=1	vvi:100252764/0.0/uncharacterized aarF domain-containing protein kinase At1g79600, chloroplastic-like; K13457 disease resistance protein RPM1	alr4515/1e-156/---	PTHR10566/0.0/--	NA
Unigene11783_All	1107	2.88462	1.13e-06	Up	gi|764583868|ref|XP_011464339.1|/1.92421e-176/PREDICTED: uncharacterized protein LOC105351519 [Fragaria vesca subsp. vesca]	NA	NA	NA	NA	NA	NA
CL323.Contig4_All	2634	1.08786	0.0018788	Up	gi|764636959|ref|XP_011470290.1|/0/PREDICTED: protein timeless homolog [Fragaria vesca subsp. vesca]	gi|470147128|ref|XR_185374.1|/0.0/PREDICTED: Fragaria vesca subsp. vesca protein timeless homolog (LOC101301736), misc_RNA	NA	fve:101301736/0.0/protein timeless homolog; K03155 timeless	NA	PF05029/2.0E-15/Timeless protein C terminal region	NA
CL6270.Contig4_All	2590	1.28946	0.0052415	Up	gi|470138827|ref|XP_004305155.1|/0/PREDICTED: uncharacterized protein At1g04910 [Fragaria vesca subsp. vesca]	gi|470138826|ref|XM_004305107.1|/0.0/PREDICTED: Fragaria vesca subsp. vesca uncharacterized LOC101298447 (LOC101298447), mRNA	sp|Q8W486|Y1491_ARATH/4e-69/Uncharacterized protein At1g04910 OS=Arabidopsis thaliana GN=At1g04910 PE=2 SV=1	mdm:103446271/4e-29/uncharacterized LOC103446271; K13506 glycerol-3-phosphate O-acyltransferase 3/4 [EC:2.3.1.15]	NA	PTHR31741:SF4/0.0/--	cellular_component:GO:0016021//integral component of membrane;
Unigene3635_All	1356	-1.19587	0.0054349	Down	gi|470113870|ref|XP_004293142.1|/0/PREDICTED: putative DNA-binding protein ESCAROLA [Fragaria vesca subsp. vesca]	gi|470113869|ref|XM_004293094.1|/0.0/PREDICTED: Fragaria vesca subsp. vesca uncharacterized LOC101309801 (LOC101309801), mRNA	sp|Q9S7C9|ESCA_ARATH/8e-32/Putative DNA-binding protein ESCAROLA OS=Arabidopsis thaliana GN=ESC PE=2 SV=1	NA	NA	PTHR31100/9.6E-53/--	NA
CL8764.Contig3_All	3713	-1.7293	6.84e-13	Down	gi|470113528|ref|XP_004292975.1|/0/PREDICTED: probable sucrose-phosphate synthase 1 [Fragaria vesca subsp. vesca]	gi|470113527|ref|XM_004292927.1|/0.0/PREDICTED: Fragaria vesca subsp. vesca probable sucrose-phosphate synthase 1-like (LOC101292871), mRNA	sp|O22060|SPSA1_CITUN/0.0/Probable sucrose-phosphate synthase 1 OS=Citrus unshiu GN=SPS1 PE=2 SV=1	fve:101292871/0.0/probable sucrose-phosphate synthase 1; K00696 sucrose-phosphate synthase [EC:2.4.1.14]	sll0045_1/8e-107/---	PTHR12526/0.0/--	biological_process:GO:0005985//sucrose metabolic process;molecular_function:GO:0016157//sucrose synthase activity;GO:0046524//sucrose-phosphate synthase activity;
Unigene747_All	2759	-1.06667	1.11e-178	Down	gi|470111340|ref|XP_004291906.1|/0/PREDICTED: laccase-14-like [Fragaria vesca subsp. vesca]	gi|470111339|ref|XM_004291858.1|/0.0/PREDICTED: Fragaria vesca subsp. vesca laccase-21-like (LOC101307959), mRNA	sp|Q2QZ80|LAC21_ORYSJ/7e-156/Laccase-21 OS=Oryza sativa subsp. japonica GN=LAC21 PE=2 SV=1	fve:101307959/0.0/laccase-14-like; K05909 laccase [EC:1.10.3.2]	YMR058w/6e-35/---	PF07732/5.4E-39/Multicopper oxidase	NA
CL5770.Contig4_All	3150	1.03515	9.87e-05	Up	gi|764548784|ref|XP_011459857.1|/0/PREDICTED: uncharacterized protein LOC101305918 [Fragaria vesca subsp. vesca]	gi|470113610|ref|XM_004292967.1|/0.0/PREDICTED: Fragaria vesca subsp. vesca cysteine-rich receptor-like protein kinase 29-like (LOC101306209), mRNA	sp|O81905|SD18_ARATH/4e-77/Receptor-like serine/threonine-protein kinase SD1-8 OS=Arabidopsis thaliana GN=SD18 PE=1 SV=1	mtr:MTR_3g011930/1e-93/cysteine-rich receptor-like kinase; K04733 interleukin-1 receptor-associated kinase 4 [EC:2.7.11.1]	Cgl2127_1/3e-12/---	PS51473/19.386/Gnk2-homologous domain profile.	biological_process:GO:0006468//protein phosphorylation;GO:0042742//defense response to bacterium;cellular_component:GO:0009506//plasmodesma;GO:0016021//integral component of membrane;GO:0005886//plasma membrane;molecular_function:GO:0004674//protein serine/threonine kinase activity;GO:0005524//ATP binding;
Unigene22359_All	1399	-1.14845	7.64e-30	Down	gi|971581588|ref|XP_015159515.1|/0/PREDICTED: adhesive plaque matrix protein-like isoform X1 [Solanum tuberosum]	gi|470124074|ref|XM_004297994.1|/0.0/PREDICTED: Fragaria vesca subsp. vesca uncharacterized LOC101307690 (LOC101307690), mRNA	sp|Q9M1G9|EXTN2_ARATH/6e-131/Extensin-2 OS=Arabidopsis thaliana GN=EXT2 PE=2 SV=1	sind:105163614/3e-98/extensin-2-like; K05747 Wiskott-Aldrich syndrome protein	Rv3876/2e-25/---	NA	NA
CL1711.Contig1_All	743	1.93033	6.05e-06	Up	gi|470123612|ref|XP_004297816.1|/5.88544e-97/PREDICTED: WAT1-related protein At4g08300-like [Fragaria vesca subsp. vesca]	gi|470123613|ref|XM_004297769.1|/0.0/PREDICTED: Fragaria vesca subsp. vesca auxin-induced protein 5NG4-like (LOC101291718), mRNA	sp|Q9FL41|WTR38_ARATH/9e-43/WAT1-related protein At5g07050 OS=Arabidopsis thaliana GN=At5g07050 PE=2 SV=1	pda:103722777/3e-34/probable fructose-bisphosphate aldolase 3, chloroplastic; K01623 fructose-bisphosphate aldolase, class I [EC:4.1.2.13]	NA	PTHR31218/1.6E-79/--	biological_process:GO:0055085//transmembrane transport;cellular_component:GO:0016021//integral component of membrane;molecular_function:GO:0022857//transmembrane transporter activity;
Unigene13317_All	792	2.29359	0.00258442	Up	gi|470148783|ref|XP_004309930.1|/7.2274e-83/PREDICTED: protein ENHANCED DOWNY MILDEW 2-like [Fragaria vesca subsp. vesca] &gt;gi|764644340|ref|XP_011457348.1| PREDICTED: protein ENHANCED DOWNY MILDEW 2-like [Fragaria vesca subsp. vesca] &gt;gi|764644344|ref|XP_011457349.1| PREDICTED: protein ENHANCED DOWNY MILDEW 2-like [Fragaria vesca subsp. vesca] &gt;gi|764644348|ref|XP_011457350.1| PREDICTED:…	gi|470148782|ref|XM_004309882.1|/0.0/PREDICTED: Fragaria vesca subsp. vesca uncharacterized LOC101304534 (LOC101304534), mRNA	NA	NA	NA	NA	NA
Unigene20311_All	1839	-1.47954	3.24e-09	Down	gi|470136389|ref|XP_004303976.1|/0/PREDICTED: cytochrome P450 94B3 [Fragaria vesca subsp. vesca]	gi|470136388|ref|XM_004303928.1|/0.0/PREDICTED: Fragaria vesca subsp. vesca cytochrome P450 94A1-like (LOC101291070), mRNA	sp|Q9SMP5|C94B3_ARATH/5e-157/Cytochrome P450 94B3 OS=Arabidopsis thaliana GN=CYP94B3 PE=2 SV=1	gra:105792294/7e-118/cytochrome P450 94A2-like; K13407 fatty acid omega-hydroxylase [EC:1.14.-.-]	VNG0422G/1e-31/---	PTHR24296/5.1E-278/--	biological_process:GO:0055114//oxidation-reduction process;cellular_component:GO:0016021//integral component of membrane;molecular_function:GO:0016705//oxidoreductase activity, acting on paired donors, with incorporation or reduction of molecular oxygen;GO:0020037//heme binding;GO:0005506//iron ion binding;GO:0004497//monooxygenase activity;
CL5181.Contig2_All	2003	1.54468	1.71e-82	Up	gi|470143983|ref|XP_004307646.1|/1.51662e-141/PREDICTED: GDSL esterase/lipase CPRD49-like [Fragaria vesca subsp. vesca]	gi|470143982|ref|XM_004307598.1|/0.0/PREDICTED: Fragaria vesca subsp. vesca GDSL esterase/lipase CPRD49-like, transcript variant 1 (LOC101303367), mRNA	sp|Q9SRM5|CPR49_ARATH/2e-111/GDSL esterase/lipase CPRD49 OS=Arabidopsis thaliana GN=CPRD49 PE=2 SV=1	NA	YOR126c/6e-20/---	PF00657/4.3E-25/GDSL-like Lipase/Acylhydrolase	NA
CL3.Contig2_All	1593	-1.88329	6.1e-05	Down	gi|470144865|ref|XP_004308067.1|/1.12999e-173/PREDICTED: short-chain dehydrogenase TIC 32, chloroplastic-like isoform X2 [Fragaria vesca subsp. vesca]	gi|470144864|ref|XM_004308019.1|/0.0/PREDICTED: Fragaria vesca subsp. vesca short-chain dehydrogenase TIC 32, chloroplastic-like (LOC101312679), mRNA	sp|Q6RVV4|TIC32_PEA/2e-141/Short-chain dehydrogenase TIC 32, chloroplastic OS=Pisum sativum GN=TIC32 PE=1 SV=1	fve:101312679/2e-174/short-chain dehydrogenase TIC 32, chloroplastic-like; K19329 WW domain-containing oxidoreductase	CC0398/3e-50/---	PTHR24320:SF44/1.6E-149/--	NA
CL3128.Contig2_All	987	1.48702	0.000499479	Up	gi|470109587|ref|XP_004291074.1|/1.3771e-159/PREDICTED: nuA4 complex subunit EAF3 homolog [Fragaria vesca subsp. vesca]	gi|470109586|ref|XM_004291026.1|/0.0/PREDICTED: Fragaria vesca subsp. vesca nuA4 complex subunit EAF3 homolog (LOC101295099), mRNA	NA	fve:101295099/2e-160/nuA4 complex subunit EAF3 homolog; K11339 mortality factor 4-like protein 1	NA	PS51640/39.031/MRG domain profile.	NA
CL2881.Contig2_All	1714	1.19602	0.00122441	Up	gi|470136157|ref|XP_004303864.1|/0/PREDICTED: serine/threonine-protein phosphatase 4 regulatory subunit 2-A-like [Fragaria vesca subsp. vesca]	gi|470136156|ref|XM_004303816.1|/0.0/PREDICTED: Fragaria vesca subsp. vesca uncharacterized LOC101305574 (LOC101305574), mRNA	sp|P31568|YCF2_OENPI/1e-06/Protein Ycf2 (Fragment) OS=Oenothera picensis GN=ycf2 PE=3 SV=1	mus:103994039/7e-11/uncharacterized serine-rich protein C215.13-like; K14306 nuclear pore complex protein Nup62	YGL028c/2e-08/---	NA	NA
Unigene15946_All	849	3.9307	7.36e-32	Up	gi|470111845|ref|XP_004292153.1|/4.68712e-131/PREDICTED: pathogenesis-related protein 1-like [Fragaria vesca subsp. vesca]	gi|470111844|ref|XM_004292105.1|/0.0/PREDICTED: Fragaria vesca subsp. vesca basic form of pathogenesis-related protein 1-like (LOC101298968), mRNA	sp|P11670|PRB1_TOBAC/3e-45/Basic form of pathogenesis-related protein 1 OS=Nicotiana tabacum PE=3 SV=1	vvi:100242451/1e-51/basic form of pathogenesis-related protein 1; K13449 pathogenesis-related protein 1	YJL078c_1/6e-28/---	PTHR10334/5.5E-63/--	cellular_component:GO:0005576//extracellular region;
Unigene1011_All	829	1.31826	0.00129135	Up	NA	NA	NA	NA	NA	NA	NA
CL1726.Contig3_All	1251	4.00657	6.84e-16	Up	gi|470105258|ref|XP_004289003.1|/1.55667e-116/PREDICTED: uncharacterized protein LOC101294986 [Fragaria vesca subsp. vesca]	gi|470105257|ref|XM_004288955.1|/0.0/PREDICTED: Fragaria vesca subsp. vesca uncharacterized LOC101294986 (LOC101294986), mRNA	sp|P33081|AX15A_SOYBN/1e-16/Auxin-induced protein 15A OS=Glycine max PE=2 SV=1	fve:101294986/3e-117/uncharacterized LOC101294986; K14488 SAUR family protein	NA	PTHR31374:SF7/2.5E-64/--	NA
CL5036.Contig3_All	858	1.05916	0.000195543	Up	gi|470114301|ref|XP_004293354.1|/1.59481e-118/PREDICTED: tropinone reductase homolog At1g07440-like [Fragaria vesca subsp. vesca]	gi|470114300|ref|XM_004293306.1|/0.0/PREDICTED: Fragaria vesca subsp. vesca tropinone reductase homolog At1g07440-like (LOC101312321), mRNA	sp|Q9ASX2|TRNH1_ARATH/9e-72/Tropinone reductase homolog At1g07440 OS=Arabidopsis thaliana GN=At1g07440 PE=1 SV=1	fve:101312321/3e-119/tropinone reductase homolog At1g07440-like; K08081 tropinone reductase I [EC:1.1.1.206]	XF0913/4e-37/---	PR00081/4.17E-31/Glucose/ribitol dehydrogenase family signature	NA
CL4344.Contig1_All	1624	2.36082	4.02e-09	Up	gi|764619422|ref|XP_011468341.1|/0/PREDICTED: 7-deoxyloganetin glucosyltransferase-like [Fragaria vesca subsp. vesca]	gi|470141365|ref|XM_004306356.1|/0.0/PREDICTED: Fragaria vesca subsp. vesca UDP-glycosyltransferase 85A2-like (LOC101313544), mRNA	sp|Q9LMF0|U85A5_ARATH/6e-159/UDP-glycosyltransferase 85A5 OS=Arabidopsis thaliana GN=UGT85A5 PE=2 SV=1	bdi:100843904/5e-110/cyanohydrin beta-glucosyltransferase-like; K13030 cyanohydrin beta-glucosyltransferase [EC:2.4.1.85]	NA	PTHR11926:SF143/1.7E-213/--	biological_process:GO:0008152//metabolic process;molecular_function:GO:0016758//transferase activity, transferring hexosyl groups;
Unigene6127_All	1011	2.4026	1.4e-27	Up	gi|470115355|ref|XP_004293868.1|/3.69523e-115/PREDICTED: uncharacterized protein LOC101295896 [Fragaria vesca subsp. vesca]	gi|470115354|ref|XM_004293820.1|/0.0/PREDICTED: Fragaria vesca subsp. vesca uncharacterized LOC101295896 (LOC101295896), mRNA	NA	NA	NA	PTHR31621/2.9E-96/--	cellular_component:GO:0016021//integral component of membrane;
CL5308.Contig1_All	1269	-2.13785	0	Down	gi|470142920|ref|XP_004307138.1|/1.88246e-109/PREDICTED: repetitive proline-rich cell wall protein 1-like [Fragaria vesca subsp. vesca]	gi|470142919|ref|XM_004307090.1|/0.0/PREDICTED: Fragaria vesca subsp. vesca uncharacterized LOC101315276 (LOC101315276), mRNA	sp|P12857|ADT2_MAIZE/8e-26/ADP,ATP carrier protein 2, mitochondrial OS=Zea mays GN=ANT2 PE=2 SV=2	fve:101300026/6e-25/ADP,ATP carrier protein, mitochondrial-like; K05863 solute carrier family 25 (mitochondrial adenine nucleotide translocator), member 4/5/6/31	NA	NA	NA
CL6008.Contig3_All	1656	3.48663	9.76e-12	Up	gi|470101247|ref|XP_004287088.1|/0/PREDICTED: aldehyde dehydrogenase family 2 member C4-like [Fragaria vesca subsp. vesca]	gi|470101246|ref|XM_004287040.1|/0.0/PREDICTED: Fragaria vesca subsp. vesca aldehyde dehydrogenase family 2 member C4-like (LOC101300274), mRNA	sp|Q56YU0|AL2C4_ARATH/0.0/Aldehyde dehydrogenase family 2 member C4 OS=Arabidopsis thaliana GN=ALDH2C4 PE=1 SV=2	fve:101300274/0.0/aldehyde dehydrogenase family 2 member C4-like; K12355 coniferyl-aldehyde dehydrogenase [EC:1.2.1.68]	SPAC9E9.09c/7e-133/---	PS00687/-/Aldehyde dehydrogenases glutamic acid active site.	NA
CL3623.Contig3_All	3201	-1.51197	1.94e-11	Down	gi|971554566|ref|XP_015165205.1|/1.10224e-06/PREDICTED: transcription factor MYB108-like, partial [Solanum tuberosum]	gi|470137762|ref|XM_004304584.1|/3e-25/PREDICTED: Fragaria vesca subsp. vesca myb-related protein 305-like (LOC101298345), mRNA	sp|Q9LK95|MYB21_ARATH/1e-07/Transcription factor MYB21 OS=Arabidopsis thaliana GN=MYB21 PE=1 SV=1	sot:102598731/2e-07/transcription factor MYB108-like; K09422 myb proto-oncogene protein, plant	NA	NA	NA
Unigene10688_All	2113	2.07344	2.9e-07	Up	gi|470112237|ref|XP_004292343.1|/0/PREDICTED: transcription factor bHLH62 [Fragaria vesca subsp. vesca]	gi|470112236|ref|XM_004292295.1|/0.0/PREDICTED: Fragaria vesca subsp. vesca transcription factor bHLH62-like (LOC101298092), mRNA	sp|Q9FJL4|BH078_ARATH/5e-102/Transcription factor bHLH78 OS=Arabidopsis thaliana GN=BHLH78 PE=2 SV=1	egu:105040114/2e-16/transcription factor PIF3-like; K12126 phytochrome-interacting factor 3	NA	PTHR12565/5.2E-86/--	molecular_function:GO:0046983//protein dimerization activity;
CL9523.Contig2_All	2226	2.19758	1.7e-06	Up	NA	gi|470117163|ref|XR_184283.1|/0.0/PREDICTED: Fragaria vesca subsp. vesca uncharacterized LOC101296845 (LOC101296845), misc_RNA	NA	NA	NA	NA	NA
Unigene10656_All	2013	1.76413	2.57e-14	Up	gi|470123446|ref|XP_004297737.1|/0/PREDICTED: cytochrome P450 86B1 [Fragaria vesca subsp. vesca]	gi|470123445|ref|XM_004297689.1|/0.0/PREDICTED: Fragaria vesca subsp. vesca cytochrome P450 86B1-like (LOC101314941), mRNA	sp|Q9FMY1|C86B1_ARATH/0.0/Cytochrome P450 86B1 OS=Arabidopsis thaliana GN=CYP86B1 PE=2 SV=1	fve:101314941/0.0/cytochrome P450 86B1; K15402 fatty acid omega-hydroxylase [EC:1.14.-.-]	BH0579/2e-34/---	PR00463/4.9E-12/E-class P450 group I signature	NA
Unigene13464_All	778	2.5591	0.000147267	Up	NA	NA	NA	NA	NA	NA	NA
Unigene13166_All	1791	-1.66562	0.00132225	Down	gi|470104105|ref|XP_004288455.1|/0/PREDICTED: cellulose synthase-like protein G2 [Fragaria vesca subsp. vesca]	gi|470104104|ref|XM_004288407.1|/0.0/PREDICTED: Fragaria vesca subsp. vesca cellulose synthase-like protein G2-like (LOC101304037), mRNA	sp|Q8VYR4|CSLG2_ARATH/1e-124/Cellulose synthase-like protein G2 OS=Arabidopsis thaliana GN=CSLG2 PE=2 SV=1	jcu:105633539/2e-110/cellulose synthase A catalytic subunit 7 [UDP-forming]; K10999 cellulose synthase A [EC:2.4.1.12]	alr3757/4e-17/---	PF03552/1.5E-81/Cellulose synthase	biological_process:GO:0030244//cellulose biosynthetic process;GO:0071555//cell wall organization;cellular_component:GO:0016021//integral component of membrane;molecular_function:GO:0016760//cellulose synthase (UDP-forming) activity;
Unigene14467_All	740	-1.31205	0.00167876	Down	gi|470133145|ref|XP_004302433.1|/6.73897e-61/PREDICTED: peroxisomal adenine nucleotide carrier 1-like [Fragaria vesca subsp. vesca]	gi|470133144|ref|XM_004302385.1|/0.0/PREDICTED: Fragaria vesca subsp. vesca peroxisomal adenine nucleotide carrier 1-like (LOC101297745), mRNA	sp|B6ZJZ9|PNC1_SOYBN/1e-52/Peroxisomal adenine nucleotide carrier 1 OS=Glycine max GN=PNC1 PE=2 SV=1	cmo:103491415/1e-45/peroxisomal adenine nucleotide carrier 1-like; K13354 solute carrier family 25 (peroxisomal adenine nucleotide transporter), member 17	NA	PTHR24089:SF100/2.6E-55/--	biological_process:GO:0055085//transmembrane transport;cellular_component:GO:0016021//integral component of membrane;
Unigene1176_All	1654	2.21626	2e-80	Up	gi|470135744|ref|XP_004303669.1|/0/PREDICTED: solute carrier family 25 member 44 [Fragaria vesca subsp. vesca]	gi|470135743|ref|XM_004303621.1|/0.0/PREDICTED: Fragaria vesca subsp. vesca solute carrier family 25 member 44-like (LOC101291738), mRNA	sp|F4HT41|SAMC2_ARATH/1e-19/Probable S-adenosylmethionine carrier 2, chloroplastic OS=Arabidopsis thaliana GN=SAMC2 PE=2 SV=1	fve:101291738/0.0/solute carrier family 25 member 44; K15121 solute carrier family 25, member 44	NA	PR00926/5.5E-5/Mitochondrial carrier protein signature	biological_process:GO:0055085//transmembrane transport;cellular_component:GO:0016021//integral component of membrane;
Unigene10491_All	2306	1.39025	2.12e-05	Up	gi|470128161|ref|XP_004300018.1|/0/PREDICTED: protein NRT1/ PTR FAMILY 4.3-like [Fragaria vesca subsp. vesca]	gi|470128160|ref|XM_004299970.1|/0.0/PREDICTED: Fragaria vesca subsp. vesca probable peptide/nitrate transporter At1g59740-like (LOC101312156), mRNA	sp|Q93VV5|PTR16_ARATH/0.0/Protein NRT1/ PTR FAMILY 4.3 OS=Arabidopsis thaliana GN=NPF4.3 PE=2 SV=1	thj:104819840/0.0/protein NRT1/ PTR FAMILY 4.3; K14638 solute carrier family 15 (peptide/histidine transporter), member 3/4	ECU11g1050/7e-23/---	PTHR11654/0.0/--	biological_process:GO:0006810//transport;cellular_component:GO:0016021//integral component of membrane;GO:0005886//plasma membrane;molecular_function:GO:0005215//transporter activity;
Unigene14015_All	1298	1.92582	8.93e-30	Up	gi|470126146|ref|XP_004299054.1|/4.00581e-155/PREDICTED: transcription factor MYB24 [Fragaria vesca subsp. vesca]	gi|470126145|ref|XM_004299006.1|/0.0/PREDICTED: Fragaria vesca subsp. vesca transcription factor WER-like (LOC101309834), mRNA	sp|Q9LDE1|MY108_ARATH/5e-59/Transcription factor MYB108 OS=Arabidopsis thaliana GN=MYB108 PE=1 SV=1	fve:101309834/7e-156/transcription factor MYB24; K09422 myb proto-oncogene protein, plant	ECU11g1690/4e-26/---	PTHR10641/1.2E-109/--	NA
Unigene10422_All	2086	-1.42809	2.71e-05	Down	gi|764618391|ref|XP_011468242.1|/0/PREDICTED: probable disease resistance protein At5g66900 [Fragaria vesca subsp. vesca]	gi|470137677|ref|XM_004304542.1|/0.0/PREDICTED: Fragaria vesca subsp. vesca probable disease resistance protein At5g66900-like (LOC101310724), mRNA	sp|Q9FKZ1|DRL42_ARATH/6e-93/Probable disease resistance protein At5g66900 OS=Arabidopsis thaliana GN=At5g66900 PE=3 SV=1	mdm:103401427/3e-31/uncharacterized LOC103401427; K13415 protein brassinosteroid insensitive 1 [EC:2.7.10.1 2.7.11.1]	NA	PF00931/8.7E-36/NB-ARC domain	NA
Unigene8388_All	1049	3.72052	4.12e-57	Up	gi|764580443|ref|XP_011463839.1|/2.67991e-124/PREDICTED: LIM domain-containing protein WLIM2b-like [Fragaria vesca subsp. vesca]	gi|449480165|ref|XM_004155769.1|/4e-22/PREDICTED: Cucumis sativus pollen-specific protein SF3-like (LOC101204422), mRNA	sp|P29675|SF3_HELAN/6e-49/Pollen-specific protein SF3 OS=Helianthus annuus GN=SF3 PE=2 SV=1	pxb:103942168/2e-92/pollen-specific protein SF3-like; K09377 cysteine and glycine-rich protein	NA	PS50023/12.137/LIM domain profile.	molecular_function:GO:0008270//zinc ion binding;
Unigene9448_All	551	-2.46988	0.00150119	Down	NA	NA	NA	NA	NA	NA	NA
CL6476.Contig2_All	2028	2.09602	0.000425254	Up	gi|764598971|ref|XP_004302462.2|/0/PREDICTED: glutathione synthetase, chloroplastic [Fragaria vesca subsp. vesca]	gi|470133202|ref|XM_004302414.1|/0.0/PREDICTED: Fragaria vesca subsp. vesca glutathione synthetase, chloroplastic-like (LOC101305956), mRNA	sp|O22494|GSHB_SOLLC/0.0/Glutathione synthetase, chloroplastic OS=Solanum lycopersicum GN=GSH2 PE=2 SV=1	fve:101305956/0.0/glutathione synthetase, chloroplastic; K01920 glutathione synthase [EC:6.3.2.3]	NA	PTHR11130/1.8E-156/--	biological_process:GO:0006750//glutathione biosynthetic process;cellular_component:GO:0005829//cytosol;GO:0009507//chloroplast;molecular_function:GO:0000287//magnesium ion binding;GO:0005524//ATP binding;GO:0004363//glutathione synthase activity;GO:0042803//protein homodimerization activity;GO:0043295//glutathione binding;
CL203.Contig5_All	2534	3.56241	1.76e-06	Up	gi|764603281|ref|XP_011466785.1|/0/PREDICTED: BTB/POZ domain-containing protein FBL11 isoform X2 [Fragaria vesca subsp. vesca]	gi|470139234|ref|XM_004305308.1|/0.0/PREDICTED: Fragaria vesca subsp. vesca BTB/POZ domain-containing protein FBL11-like (LOC101292621), mRNA	sp|Q8S8F2|FBL11_ARATH/0.0/BTB/POZ domain-containing protein FBL11 OS=Arabidopsis thaliana GN=FBL11 PE=2 SV=2	tcc:TCM_021071/6e-17/F-box/RNI-like superfamily protein isoform 1; K10268 F-box and leucine-rich repeat protein 2/20	NA	PF00560/0.45/Leucine Rich Repeat	NA
Unigene21245_All	2030	1.65397	0.00152104	Up	gi|470111394|ref|XP_004291933.1|/0/PREDICTED: lysine histidine transporter-like 8 [Fragaria vesca subsp. vesca]	gi|470111393|ref|XM_004291885.1|/0.0/PREDICTED: Fragaria vesca subsp. vesca lysine histidine transporter-like 8-like (LOC101290926), mRNA	sp|Q9SX98|LHTL8_ARATH/0.0/Lysine histidine transporter-like 8 OS=Arabidopsis thaliana GN=AATL1 PE=1 SV=1	sind:105169832/2e-99/lysine histidine transporter-like 8; K14209 solute carrier family 36 (proton-coupled amino acid transporter)	NA	PTHR22950:SF233/2.7E-244/--	cellular_component:GO:0016021//integral component of membrane;
CL953.Contig9_All	4961	2.21521	1.18e-47	Up	gi|470125128|ref|XP_004298558.1|/0/PREDICTED: ABC transporter C family member 8-like [Fragaria vesca subsp. vesca]	gi|470125127|ref|XM_004298510.1|/0.0/PREDICTED: Fragaria vesca subsp. vesca ABC transporter C family member 8-like (LOC101297639), mRNA	sp|Q8LGU1|AB8C_ARATH/0.0/ABC transporter C family member 8 OS=Arabidopsis thaliana GN=ABCC8 PE=2 SV=3	vra:106773074/0.0/ABC transporter C family member 8-like; K05665 ATP-binding cassette, subfamily C (CFTR/MRP), member 1	SPAC3F10.11c/0.0/---	PS00211/-/ABC transporters family signature.	biological_process:GO:0055085//transmembrane transport;cellular_component:GO:0016021//integral component of membrane;molecular_function:GO:0005524//ATP binding;GO:0042626//ATPase activity, coupled to transmembrane movement of substances;
Unigene8045_All	1810	-1.06212	3.61e-05	Down	gi|470105765|ref|XP_004289250.1|/0/PREDICTED: bifunctional 3-dehydroquinate dehydratase/shikimate dehydrogenase, chloroplastic-like [Fragaria vesca subsp. vesca]	gi|470105764|ref|XM_004289202.1|/0.0/PREDICTED: Fragaria vesca subsp. vesca bifunctional 3-dehydroquinate dehydratase/shikimate dehydrogenase, chloroplastic-like (LOC101303651), mRNA	sp|Q9SQT8|DHQSD_ARATH/0.0/Bifunctional 3-dehydroquinate dehydratase/shikimate dehydrogenase, chloroplastic OS=Arabidopsis thaliana GN=EMB3004 PE=1 SV=1	fve:101303651/0.0/bifunctional 3-dehydroquinate dehydratase/shikimate dehydrogenase, chloroplastic-like; K13832 3-dehydroquinate dehydratase / shikimate dehydrogenase [EC:4.2.1.10 1.1.1.25]	MA4594/6e-38/---	PF08501/2.3E-25/Shikimate dehydrogenase substrate binding domain	biological_process:GO:0055114//oxidation-reduction process;molecular_function:GO:0003855//3-dehydroquinate dehydratase activity;GO:0004764//shikimate 3-dehydrogenase (NADP+) activity;
CL4215.Contig3_All	1404	1.76399	4.31e-05	Up	gi|470127593|ref|XP_004299752.1|/0/PREDICTED: alternative oxidase 3, mitochondrial-like [Fragaria vesca subsp. vesca]	gi|470127592|ref|XM_004299704.1|/0.0/PREDICTED: Fragaria vesca subsp. vesca alternative oxidase 3, mitochondrial-like (LOC101302164), mRNA	sp|O03376|AOX3_SOYBN/4e-131/Alternative oxidase 3, mitochondrial OS=Glycine max GN=AOX3 PE=1 SV=1	fve:101302164/0.0/alternative oxidase 3, mitochondrial-like; K17893 ubiquinol oxidase [EC:1.10.3.11]	NA	PTHR31803/3.7E-144/--	biological_process:GO:0055114//oxidation-reduction process;cellular_component:GO:0016021//integral component of membrane;GO:0070469//respiratory chain;molecular_function:GO:0046872//metal ion binding;GO:0009916//alternative oxidase activity;
Unigene809_All	735	4.01655	7e-17	Up	gi|764580473|ref|XP_004300779.2|/3.12755e-74/PREDICTED: actin-depolymerizing factor 7-like [Fragaria vesca subsp. vesca]	gi|470129765|ref|XM_004300731.1|/0.0/PREDICTED: Fragaria vesca subsp. vesca actin-depolymerizing factor 7-like (LOC101305852), mRNA	sp|Q67ZM4|ADF7_ARATH/3e-61/Actin-depolymerizing factor 7 OS=Arabidopsis thaliana GN=ADF7 PE=2 SV=1	fve:101305852/6e-75/actin-depolymerizing factor 7-like; K05765 cofilin	NA	PTHR11913:SF19/6.4E-86/--	biological_process:GO:0030042//actin filament depolymerization;cellular_component:GO:0015629//actin cytoskeleton;molecular_function:GO:0003779//actin binding;
CL8730.Contig1_All	1594	-1.14528	0.00010423	Down	gi|764523154|ref|XP_011457688.1|/4.99332e-113/PREDICTED: uncharacterized protein LOC101312602 [Fragaria vesca subsp. vesca] &gt;gi|764523160|ref|XP_011457689.1| PREDICTED: uncharacterized protein LOC101312602 [Fragaria vesca subsp. vesca]	gi|470111531|ref|XM_004291953.1|/0.0/PREDICTED: Fragaria vesca subsp. vesca UPF0496 protein At4g34320-like (LOC101312602), mRNA	sp|Q9SYZ7|U496A_ARATH/1e-22/UPF0496 protein At4g34320 OS=Arabidopsis thaliana GN=At4g34320 PE=2 SV=1	NA	NA	PF05055/2.7E-35/Protein of unknown function (DUF677)	NA
CL1444.Contig4_All	2336	-1.64876	6.76e-98	Down	gi|470125383|ref|XP_004298682.1|/0/PREDICTED: geraniol 8-hydroxylase-like [Fragaria vesca subsp. vesca]	gi|470125382|ref|XM_004298634.1|/0.0/PREDICTED: Fragaria vesca subsp. vesca flavonoid 3'-monooxygenase-like (LOC101296377), mRNA	sp|Q9SD85|F3PH_ARATH/3e-102/Flavonoid 3'-monooxygenase OS=Arabidopsis thaliana GN=CYP75B1 PE=1 SV=1	rcu:8272130/0.0/geraniol 8-hydroxylase; K00512 steroid 17alpha-monooxygenase / 17alpha-hydroxyprogesterone aldolase [EC:1.14.14.19 4.1.2.30]	alr4766/6e-25/---	PR00385/2.5E-10/P450 superfamily signature	biological_process:GO:0055114//oxidation-reduction process;molecular_function:GO:0016705//oxidoreductase activity, acting on paired donors, with incorporation or reduction of molecular oxygen;GO:0020037//heme binding;GO:0005506//iron ion binding;GO:0004497//monooxygenase activity;
Unigene15156_All	889	1.77644	7.54e-50	Up	gi|470121677|ref|XP_004296888.1|/1.35261e-83/PREDICTED: major allergen Pru ar 1-like [Fragaria vesca subsp. vesca]	gi|470121676|ref|XM_004296840.1|/0.0/PREDICTED: Fragaria vesca subsp. vesca major allergen Pru ar 1-like (LOC101299175), mRNA	sp|O50001|PRU1_PRUAR/7e-70/Major allergen Pru ar 1 OS=Prunus armeniaca PE=1 SV=1	NA	NA	PF00407/1.8E-34/Pathogenesis-related protein Bet v I family	biological_process:GO:0006952//defense response;GO:0009607//response to biotic stimulus;
Unigene5766_All	904	2.66694	9.91e-07	Up	gi|595892656|ref|XP_007213567.1|/5.3631e-19/hypothetical protein PRUPE_ppa015732mg [Prunus persica] &gt;gi|462409432|gb|EMJ14766.1| hypothetical protein PRUPE_ppa015732mg [Prunus persica]	gi|211971103|gb|AC233035.1|/7e-08/Oryza minuta clone OM__Ba0057O14, complete sequence	NA	NA	NA	NA	NA
CL5176.Contig7_All	1865	-1.00327	4.58e-09	Down	gi|470104694|ref|XP_004288732.1|/0/PREDICTED: UDP-glycosyltransferase 74E1-like, partial [Fragaria vesca subsp. vesca]	gi|470104693|ref|XM_004288684.1|/0.0/PREDICTED: Fragaria vesca subsp. vesca UDP-glycosyltransferase 74E1-like (LOC101295080), partial mRNA	sp|P0C7P7|U74E1_ARATH/2e-122/UDP-glycosyltransferase 74E1 OS=Arabidopsis thaliana GN=UGT74E1 PE=3 SV=1	pmum:103335041/2e-129/UDP-glycosyltransferase 74G1-like; K13691 pathogen-inducible salicylic acid glucosyltransferase [EC:2.4.1.-]	slr1125/4e-06/---	PF00201/3.3E-31/UDP-glucoronosyl and UDP-glucosyl transferase	NA
CL6820.Contig1_All	8828	1.03054	1.17e-05	Up	gi|764531062|ref|XP_011458341.1|/0/PREDICTED: phragmoplast orienting kinesin 2 [Fragaria vesca subsp. vesca]	gi|470112471|ref|XM_004292410.1|/0.0/PREDICTED: Fragaria vesca subsp. vesca uncharacterized LOC101313387 (LOC101313387), mRNA	sp|Q27IK6|POK2_ARATH/0.0/Phragmoplast orienting kinesin 2 OS=Arabidopsis thaliana GN=POK2 PE=2 SV=1	fve:101313387/0.0/phragmoplast orienting kinesin 2; K10400 kinesin family member 15	SPAC1834.07/1e-63/---	PF00225/9.0E-109/Kinesin motor domain	NA
CL8111.Contig1_All	908	1.21599	1.35e-16	Up	gi|470111636|ref|XP_004292051.1|/3.68894e-84/PREDICTED: plastid division protein PDV2-like [Fragaria vesca subsp. vesca]	gi|470111635|ref|XM_004292003.1|/0.0/PREDICTED: Fragaria vesca subsp. vesca plastid division protein PDV2-like (LOC101306114), mRNA	sp|P23244|HBP2_CASGL/1e-72/Hemoglobin-2 OS=Casuarina glauca GN=HBII PE=3 SV=1	NA	NA	PF00042/2.2E-18/Globin	molecular_function:GO:0046872//metal ion binding;GO:0020037//heme binding;GO:0019825//oxygen binding;
Unigene313_All	2635	4.14378	2.46e-90	Up	gi|764505763|ref|XP_011460616.1|/0/PREDICTED: glycerophosphodiester phosphodiesterase GDPDL7-like [Fragaria vesca subsp. vesca]	gi|470104636|ref|XM_004288656.1|/0.0/PREDICTED: Fragaria vesca subsp. vesca probable glycerophosphoryl diester phosphodiesterase 1-like (LOC101311131), mRNA	sp|Q9SZ11|GLPQ2_ARATH/2e-171/Probable glycerophosphoryl diester phosphodiesterase 2 OS=Arabidopsis thaliana GN=GPDL2 PE=1 SV=3	mdm:103428020/5e-122/probable glycerophosphoryl diester phosphodiesterase 2; K01126 glycerophosphoryl diester phosphodiesterase [EC:3.1.4.46]	all1051/1e-16/---	PTHR23344/6.3E-220/--	cellular_component:GO:0016020//membrane;molecular_function:GO:0008081//phosphoric diester hydrolase activity;
Unigene17557_All	1912	1.27489	0.00100498	Up	gi|764635761|ref|XP_011470146.1|/6.15277e-52/PREDICTED: serine/threonine-protein kinase TIO isoform X2 [Fragaria vesca subsp. vesca]	gi|470144476|ref|XM_004307835.1|/5e-63/PREDICTED: Fragaria vesca subsp. vesca serine/threonine-protein kinase TIO-like (LOC101302400), mRNA	sp|Q2QAV0|TIO_ARATH/1e-36/Serine/threonine-protein kinase TIO OS=Arabidopsis thaliana GN=TIO PE=1 SV=1	fve:101302400/1e-52/serine/threonine-protein kinase TIO; K06228 fused [EC:2.7.11.1]	NA	NA	NA
Unigene4769_All	497	2.52461	0.00113846	Up	gi|764620847|ref|XP_011468563.1|/9.33539e-16/PREDICTED: uncharacterized protein LOC105352685 [Fragaria vesca subsp. vesca]	NA	NA	bna:106394339/4e-08/uncharacterized LOC106394339; K01188 beta-glucosidase [EC:3.2.1.21]	NA	NA	NA
CL860.Contig8_All	1903	1.63833	0.000769102	Up	gi|764611398|ref|XP_011467586.1|/2.059e-15/PREDICTED: ATP-dependent DNA helicase PIF1-like [Fragaria vesca subsp. vesca]	gi|470145497|ref|XM_004308327.1|/1e-60/PREDICTED: Fragaria vesca subsp. vesca uncharacterized LOC101294118 (LOC101294118), mRNA	NA	fve:101292240/4e-16/ATP-dependent DNA helicase PIF1-like; K15255 ATP-dependent DNA helicase PIF1 [EC:3.6.4.12]	NA	NA	NA
Unigene494_All	2078	2.21454	8.41e-09	Up	gi|470106038|ref|XP_004289384.1|/0/PREDICTED: probable sphingolipid transporter spinster homolog 2 [Fragaria vesca subsp. vesca]	gi|470106037|ref|XM_004289336.1|/0.0/PREDICTED: Fragaria vesca subsp. vesca probable sphingolipid transporter spinster homolog 2-like (LOC101305222), mRNA	sp|Q9FLG8|SPNS2_ARATH/0.0/Probable sphingolipid transporter spinster homolog 2 OS=Arabidopsis thaliana GN=At5g64500 PE=2 SV=1	NA	CC0336/6e-20/---	PTHR24003:SF514/1.8E-241/--	biological_process:GO:0055085//transmembrane transport;cellular_component:GO:0016021//integral component of membrane;
CL6807.Contig2_All	2584	1.59048	0.000105807	Up	gi|470122061|ref|XP_004297068.1|/0/PREDICTED: ABC transporter B family member 4-like [Fragaria vesca subsp. vesca]	gi|470122060|ref|XM_004297020.1|/0.0/PREDICTED: Fragaria vesca subsp. vesca ABC transporter B family member 4-like (LOC101307483), mRNA	sp|Q9M1Q9|AB21B_ARATH/0.0/ABC transporter B family member 21 OS=Arabidopsis thaliana GN=ABCB21 PE=1 SV=2	fve:101307483/0.0/ABC transporter B family member 4-like; K05658 ATP-binding cassette, subfamily B (MDR/TAP), member 1 [EC:3.6.3.44]	SPCC663.03/5e-139/---	PS50893/24.357/ATP-binding cassette, ABC transporter-type domain profile.	biological_process:GO:0055085//transmembrane transport;cellular_component:GO:0016021//integral component of membrane;molecular_function:GO:0005524//ATP binding;GO:0042626//ATPase activity, coupled to transmembrane movement of substances;
Unigene15716_All	953	-2.76836	0.000127759	Down	gi|764522399|ref|XP_011457377.1|/5.96882e-64/PREDICTED: uncharacterized protein LOC105349420 [Fragaria vesca subsp. vesca]	NA	NA	NA	NA	NA	NA
CL1050.Contig1_All	4300	1.00602	2.02e-10	Up	gi|764573252|ref|XP_011462843.1|/0/PREDICTED: kinesin-like protein KIN12B [Fragaria vesca subsp. vesca]	gi|470121826|ref|XM_004296910.1|/0.0/PREDICTED: Fragaria vesca subsp. vesca kinesin-like protein KIN12B-like (LOC101296198), mRNA	sp|Q8L7Y8|KN12B_ARATH/0.0/Kinesin-like protein KIN12B OS=Arabidopsis thaliana GN=KIN12B PE=1 SV=1	fve:101296198/0.0/kinesin-like protein KIN12B; K10400 kinesin family member 15	SPAC1834.07/2e-62/---	SM00129/5.3E-167/Kinesin motor, catalytic domain. ATPase.	biological_process:GO:0007018//microtubule-based movement;molecular_function:GO:0005524//ATP binding;GO:0003777//microtubule motor activity;GO:0008017//microtubule binding;
CL3361.Contig3_All	1716	4.26783	1.73e-09	Up	gi|470135298|ref|XP_004303454.1|/0/PREDICTED: guanine nucleotide-binding protein alpha-1 subunit isoform X1 [Fragaria vesca subsp. vesca]	gi|470135297|ref|XM_004303406.1|/0.0/PREDICTED: Fragaria vesca subsp. vesca guanine nucleotide-binding protein alpha-1 subunit-like (LOC101297561), mRNA	sp|P93564|GPA1_SOLTU/0.0/Guanine nucleotide-binding protein alpha-1 subunit OS=Solanum tuberosum GN=GPA1 PE=2 SV=1	fve:101297561/0.0/guanine nucleotide-binding protein alpha-1 subunit; K19729 guanine nucleotide-binding protein G(t) subunit alpha 3	NA	PF00503/6.5E-84/G-protein alpha subunit	biological_process:GO:0006571//tyrosine biosynthetic process;GO:0042127//regulation of cell proliferation;GO:0009785//blue light signaling pathway;GO:0010244//response to low fluence blue light stimulus by blue low-fluence system;GO:0009749//response to glucose;GO:0009788//negative regulation of abscisic acid-activated signaling pathway;GO:0010027//thylakoid membrane organization;GO:0009740//gibb…
Unigene26560_All	753	3.75479	6.25e-14	Up	gi|764509159|ref|XP_011459525.1|/2.45902e-114/PREDICTED: inositol oxygenase 4 [Fragaria vesca subsp. vesca]	gi|470102107|ref|XM_004287453.1|/0.0/PREDICTED: Fragaria vesca subsp. vesca inositol oxygenase 4-like (LOC101304030), mRNA	sp|O82200|MIOX2_ARATH/3e-97/Inositol oxygenase 2 OS=Arabidopsis thaliana GN=MIOX2 PE=2 SV=2	fve:101304030/5e-115/inositol oxygenase 4; K00469 inositol oxygenase [EC:1.13.99.1]	NA	PF05153/1.4E-83/Family of unknown function (DUF706)	NA
CL8411.Contig4_All	1780	-2.71814	4.37e-07	Down	gi|764551952|ref|XP_011460217.1|/0/PREDICTED: F-box protein At5g46170 [Fragaria vesca subsp. vesca]	gi|372477774|gb|JN941563.1|/9e-83/Malus x domestica F-box family protein (FBP) mRNA, complete cds	sp|Q9FNK5|FB285_ARATH/9e-159/F-box protein At5g46170 OS=Arabidopsis thaliana GN=At5g46170 PE=2 SV=1	bna:106372989/2e-53/KH domain-containing protein At4g18375-like; K13162 poly(rC)-binding protein 2/3/4	YPO2725/2e-12/---	PTHR31215/1.2E-146/--	NA
Unigene18901_All	1301	3.53706	2.14e-20	Up	gi|764579588|ref|XP_011463693.1|/1.86704e-152/PREDICTED: nucleolin [Fragaria vesca subsp. vesca]	NA	NA	mdm:103415148/7e-31/uncharacterized LOC103415148; K16675 palmitoyltransferase ZDHHC9/14/18 [EC:2.3.1.225]	SPCC825.01/5e-06/---	NA	NA
Unigene5598_All	4827	-1.49648	8.21e-13	Down	gi|764641944|ref|XP_011470919.1|/0/PREDICTED: uncharacterized protein LOC101297108 [Fragaria vesca subsp. vesca]	gi|470110109|ref|XM_004291282.1|/0.0/PREDICTED: Fragaria vesca subsp. vesca calcium-dependent protein kinase 29-like (LOC101297901), mRNA	sp|Q8RWL2|CDPKT_ARATH/2e-36/Calcium-dependent protein kinase 29 OS=Arabidopsis thaliana GN=CPK29 PE=2 SV=2	fve:101297901/7e-51/calcium-dependent protein kinase 29; K13412 calcium-dependent protein kinase [EC:2.7.11.1]	SPAC3A12.14/9e-12/---	PF10536/5.9E-34/Plant mobile domain	NA
CL132.Contig19_All	1110	1.12112	3.72e-05	Up	NA	gi|470102496|ref|XR_183700.1|/2e-15/PREDICTED: Fragaria vesca subsp. vesca 1-deoxy-D-xylulose 5-phosphate reductoisomerase, chloroplastic-like (LOC101312474), misc_RNA	NA	NA	NA	NA	NA
CL8382.Contig1_All	1295	3.58816	1.94e-08	Up	gi|470126128|ref|XP_004299045.1|/4.5997e-127/PREDICTED: uncharacterized protein LOC101307203 [Fragaria vesca subsp. vesca]	gi|470126127|ref|XM_004298997.1|/0.0/PREDICTED: Fragaria vesca subsp. vesca uncharacterized LOC101307203 (LOC101307203), mRNA	NA	brp:103847542/2e-67/clathrin interactor EPSIN 1; K12471 epsin	NA	PTHR31042:SF7/3.0E-125/--	cellular_component:GO:0016021//integral component of membrane;molecular_function:GO:0008375//acetylglucosaminyltransferase activity;
CL1211.Contig2_All	2116	1.38217	2.98e-06	Up	gi|470116587|ref|XP_004294461.1|/0/PREDICTED: scarecrow-like protein 21 [Fragaria vesca subsp. vesca] &gt;gi|470116589|ref|XP_004294462.1| PREDICTED: scarecrow-like protein 21 [Fragaria vesca subsp. vesca]	gi|470116588|ref|XM_004294414.1|/0.0/PREDICTED: Fragaria vesca subsp. vesca scarecrow-like transcription factor PAT1-like, transcript variant 2 (LOC101307764), mRNA	sp|Q9LDL7|PAT1_ARATH/4e-173/Scarecrow-like transcription factor PAT1 OS=Arabidopsis thaliana GN=PAT1 PE=2 SV=1	aip:107610130/2e-64/DELLA protein GAI; K14494 DELLA protein	NA	PTHR31636/1.2E-275/--	biological_process:GO:0006355//regulation of transcription, DNA-templated;cellular_component:GO:0005829//cytosol;
Unigene21120_All	1572	1.84845	9.39e-38	Up	gi|470137039|ref|XP_004304286.1|/0/PREDICTED: NAC domain-containing protein 100 [Fragaria vesca subsp. vesca]	gi|470137038|ref|XM_004304238.1|/0.0/PREDICTED: Fragaria vesca subsp. vesca NAC domain-containing protein 100-like (LOC101311690), mRNA	sp|Q9FLJ2|NC100_ARATH/1e-97/NAC domain-containing protein 100 OS=Arabidopsis thaliana GN=NAC100 PE=2 SV=1	bna:106383523/4e-21/NAC domain-containing protein 89-like; K12581 CCR4-NOT transcription complex subunit 7/8	NA	PF02365/2.4E-54/No apical meristem (NAM) protein	biological_process:GO:0006355//regulation of transcription, DNA-templated;cellular_component:GO:0005634//nucleus;molecular_function:GO:0003677//DNA binding;
CL2251.Contig15_All	2449	-1.79035	0.000607392	Down	gi|764608947|ref|XP_011467346.1|/0/PREDICTED: folylpolyglutamate synthase isoform X2 [Fragaria vesca subsp. vesca]	gi|470135643|ref|XM_004303574.1|/0.0/PREDICTED: Fragaria vesca subsp. vesca folylpolyglutamate synthase-like (LOC101300744), mRNA	sp|F4J2K2|FPGS2_ARATH/3e-175/Folylpolyglutamate synthase OS=Arabidopsis thaliana GN=FPGS2 PE=1 SV=1	fve:101300744/0.0/folylpolyglutamate synthase; K01930 folylpolyglutamate synthase [EC:6.3.2.17]	SPBC1709.17/2e-39/---	PTHR11136:SF5/3.7E-50/--	NA
Unigene17949_All	2894	1.60611	1.83e-31	Up	gi|764631479|ref|XP_011469654.1|/0/PREDICTED: protein ENHANCED DISEASE RESISTANCE 2-like [Fragaria vesca subsp. vesca]	gi|470146341|ref|XM_004308737.1|/0.0/PREDICTED: Fragaria vesca subsp. vesca uncharacterized LOC101295576 (LOC101295576), mRNA	sp|F4JSE7|EDR2_ARATH/5e-85/Protein ENHANCED DISEASE RESISTANCE 2 OS=Arabidopsis thaliana GN=EDR2 PE=2 SV=1	NA	NA	PS50848/21.835/START domain profile.	NA
CL3200.Contig2_All	769	-1.46176	0.000345966	Down	gi|764518667|ref|XP_011467804.1|/3.8429e-94/PREDICTED: DNA-directed RNA polymerase V subunit 7-like [Fragaria vesca subsp. vesca] &gt;gi|764518674|ref|XP_011467809.1| PREDICTED: DNA-directed RNA polymerase V subunit 7-like [Fragaria vesca subsp. vesca]	gi|470106223|ref|XM_004289425.1|/0.0/PREDICTED: Fragaria vesca subsp. vesca DNA-directed RNA polymerase II subunit RPB7-like (LOC101291678), mRNA	sp|A6QRA1|NRPE7_ARATH/2e-43/DNA-directed RNA polymerase V subunit 7 OS=Arabidopsis thaliana GN=NRPE7 PE=1 SV=1	fve:101291678/7e-95/DNA-directed RNA polymerase V subunit 7-like; K16253 DNA-directed RNA polymerase IV and V subunit 7	VNG2053G/7e-12/---	PF03876/9.8E-9/SHS2 domain found in N terminus of Rpb7p/Rpc25p/MJ0397	NA
CL8650.Contig1_All	978	2.16613	0.00175669	Up	gi|764628370|ref|XP_011469341.1|/2.36494e-180/PREDICTED: ATP-dependent DNA helicase mph1 [Fragaria vesca subsp. vesca] &gt;gi|764628375|ref|XP_011469342.1| PREDICTED: ATP-dependent DNA helicase mph1 [Fragaria vesca subsp. vesca]	gi|470145889|ref|XM_004308517.1|/0.0/PREDICTED: Fragaria vesca subsp. vesca uncharacterized LOC101314231 (LOC101314231), mRNA	NA	fve:101314231/0.0/ATP-dependent DNA helicase mph1; K10896 fanconi anemia group M protein	NA	NA	molecular_function:GO:1901363//heterocyclic compound binding;GO:0097159//organic cyclic compound binding;
CL6435.Contig2_All	1712	-1.57374	3.15e-145	Down	gi|470133990|ref|XP_004302841.1|/0/PREDICTED: GDSL esterase/lipase APG [Fragaria vesca subsp. vesca]	gi|470133989|ref|XM_004302793.1|/0.0/PREDICTED: Fragaria vesca subsp. vesca GDSL esterase/lipase APG-like (LOC101298910), mRNA	sp|Q9LU14|APG2_ARATH/1e-145/GDSL esterase/lipase APG OS=Arabidopsis thaliana GN=APG PE=1 SV=1	aly:ARALYDRAFT_316517/4e-49/T4O12.15; K01188 beta-glucosidase [EC:3.2.1.21]	all3634/8e-18/---	PF00657/5.7E-34/GDSL-like Lipase/Acylhydrolase	cellular_component:GO:0048046//apoplast;molecular_function:GO:0016788//hydrolase activity, acting on ester bonds;
CL4539.Contig2_All	1235	1.0941	0.00283363	Up	gi|470113181|ref|XP_004292805.1|/0/PREDICTED: uncharacterized protein LOC101311158 [Fragaria vesca subsp. vesca]	gi|470113180|ref|XM_004292757.1|/0.0/PREDICTED: Fragaria vesca subsp. vesca uncharacterized LOC101311158 (LOC101311158), mRNA	sp|P0C7P8|LHWL1_ARATH/3e-15/Transcription factor EMB1444 OS=Arabidopsis thaliana GN=EMB1444 PE=2 SV=1	ath:AT4G17750/7e-07/HSF1; heat stress transcription factor A-1a; K09419 heat shock transcription factor, other eukaryote	YBL084c/9e-08/---	PTHR13902/4.2E-102/--	NA
CL1931.Contig2_All	2016	-2.41303	0.00195889	Down	gi|764581537|ref|XP_004298941.2|/0/PREDICTED: putative pentatricopeptide repeat-containing protein At3g01580 [Fragaria vesca subsp. vesca] &gt;gi|764581540|ref|XP_011464010.1| PREDICTED: putative pentatricopeptide repeat-containing protein At3g01580 [Fragaria vesca subsp. vesca] &gt;gi|764581543|ref|XP_011464011.1| PREDICTED: putative pentatricopeptide repeat-containing protein At3g01580 [Fragari…	gi|470130005|ref|XM_004300850.1|/7e-53/PREDICTED: Fragaria vesca subsp. vesca pentatricopeptide repeat-containing protein At4g35130, chloroplastic-like (LOC101294666), mRNA	sp|A8MQA3|PP330_ARATH/2e-93/Pentatricopeptide repeat-containing protein At4g21065 OS=Arabidopsis thaliana GN=PCMP-H28 PE=2 SV=2	mtr:MTR_4g024860/1e-74/SLOW growth protein; K19589 release factor glutamine methyltransferase [EC:2.1.1.297]	NA	PS51375/12.123/Pentatricopeptide (PPR) repeat profile.	molecular_function:GO:0008270//zinc ion binding;
Unigene11494_All	776	-2.41646	0.000157194	Down	gi|855307797|ref|XP_012896275.1|/5.20556e-22/uncharacterized protein [Blastocystis hominis] &gt;gi|300176010|emb|CBK22227.2| unnamed protein product [Blastocystis hominis]	NA	sp|Q9FFW5|PERK8_ARATH/2e-19/Proline-rich receptor-like protein kinase PERK8 OS=Arabidopsis thaliana GN=PERK8 PE=1 SV=1	gsl:Gasu_61540/1e-17/SNARE-interacting protein-like protein; K15292 syntaxin-binding protein 1	Rv0312/3e-13/---	NA	NA
Unigene3980_All	332	2.70658	1.32e-05	Up	gi|470121685|ref|XP_004296892.1|/1.17672e-19/PREDICTED: major allergen Pru ar 1-like [Fragaria vesca subsp. vesca]	gi|470121682|ref|XM_004296843.1|/1e-116/PREDICTED: Fragaria vesca subsp. vesca major allergen Pru ar 1-like (LOC101300045), mRNA	sp|O50001|PRU1_PRUAR/4e-16/Major allergen Pru ar 1 OS=Prunus armeniaca PE=1 SV=1	NA	NA	NA	biological_process:GO:0006952//defense response;GO:0009607//response to biotic stimulus;
CL6748.Contig1_All	1024	2.25272	0.000153037	Up	gi|470129292|ref|XP_004300557.1|/4.5237e-145/PREDICTED: salicylic acid-binding protein 2-like isoform X1 [Fragaria vesca subsp. vesca]	gi|470129291|ref|XM_004300509.1|/0.0/PREDICTED: Fragaria vesca subsp. vesca salicylic acid-binding protein 2-like, transcript variant 1 (LOC101307400), mRNA	sp|Q6RYA0|SABP2_TOBAC/3e-59/Salicylic acid-binding protein 2 OS=Nicotiana tabacum GN=SABP2 PE=1 SV=1	ath:AT2G23610/1e-55/MES3; methyl esterase 3; K08233 polyneuridine-aldehyde esterase [EC:3.1.1.78]	BH2279/3e-06/---	PF12697/1.9E-28/Alpha/beta hydrolase family	NA
CL1251.Contig3_All	1539	1.96062	3.22e-22	Up	gi|470124943|ref|XP_004298468.1|/0/PREDICTED: jasmonate O-methyltransferase-like [Fragaria vesca subsp. vesca]	gi|470124942|ref|XM_004298420.1|/0.0/PREDICTED: Fragaria vesca subsp. vesca jasmonate O-methyltransferase-like (LOC101291918), mRNA	sp|Q9AR07|JMT_ARATH/6e-103/Jasmonate O-methyltransferase OS=Arabidopsis thaliana GN=JMT PE=1 SV=3	fve:101291918/0.0/jasmonate O-methyltransferase-like; K08241 jasmonate O-methyltransferase [EC:2.1.1.141]	NA	PTHR31009/4.7E-134/--	NA
CL5796.Contig3_All	1366	1.01023	0.00549804	Up	gi|922352791|ref|XP_013452212.1|/1.5288e-51/SNF1-related kinase catalytic subunit alpha KIN11 [Medicago truncatula] &gt;gi|657382321|gb|KEH26240.1| SNF1-related kinase catalytic subunit alpha KIN11 [Medicago truncatula]	gi|470103016|ref|XR_183714.1|/8e-18/PREDICTED: Fragaria vesca subsp. vesca uncharacterized LOC101291087 (LOC101291087), misc_RNA	sp|Q38997|KIN10_ARATH/3e-51/SNF1-related protein kinase catalytic subunit alpha KIN10 OS=Arabidopsis thaliana GN=KIN10 PE=1 SV=2	mtr:MTR_6g048250/3e-52/SNF1-related kinase catalytic subunit alpha KIN11; K07198 5'-AMP-activated protein kinase, catalytic alpha subunit [EC:2.7.11.11]	ECU01g0630/6e-26/---	PTHR24343/1.9E-81/--	NA
Unigene3592_All	886	-1.1182	0.00273805	Down	NA	gi|470119117|ref|XM_004295615.1|/5e-24/PREDICTED: Fragaria vesca subsp. vesca uncharacterized LOC101292685 (LOC101292685), mRNA	NA	NA	NA	NA	NA
Unigene21282_All	805	3.28996	6.78e-10	Up	gi|470105387|ref|XP_004289066.1|/2.06465e-93/PREDICTED: uncharacterized protein LOC101290814 [Fragaria vesca subsp. vesca]	gi|470105386|ref|XM_004289018.1|/0.0/PREDICTED: Fragaria vesca subsp. vesca uncharacterized LOC101290814 (LOC101290814), mRNA	NA	NA	NA	NA	NA
CL350.Contig1_All	845	1.39062	0.000199724	Up	gi|645276149|ref|XP_008243150.1|/3.67432e-27/PREDICTED: protein IDA [Prunus mume]	gi|255566802|ref|XM_002524339.1|/4e-06/Ricinus communis conserved hypothetical protein, mRNA	sp|Q8LAD7|IDA_ARATH/8e-07/Protein IDA OS=Arabidopsis thaliana GN=IDA PE=2 SV=1	NA	NA	NA	NA
CL7385.Contig2_All	1048	2.17179	0.00525354	Up	gi|470126880|ref|XP_004299410.1|/2.88323e-86/PREDICTED: uncharacterized protein LOC101295132 [Fragaria vesca subsp. vesca]	gi|470126879|ref|XM_004299362.1|/0.0/PREDICTED: Fragaria vesca subsp. vesca uncharacterized LOC101295132 (LOC101295132), mRNA	NA	NA	NA	NA	cellular_component:GO:0005768//endosome;GO:0016021//integral component of membrane;GO:0005802//trans-Golgi network;
CL3678.Contig1_All	2351	2.78367	0.00030955	Up	gi|764527382|ref|XP_011458049.1|/0/PREDICTED: tyrosine decarboxylase 1 [Fragaria vesca subsp. vesca]	gi|470112043|ref|XM_004292200.1|/0.0/PREDICTED: Fragaria vesca subsp. vesca tyrosine decarboxylase 1-like (LOC101314251), mRNA	sp|Q8RY79|TYDC1_ARATH/4e-177/Tyrosine decarboxylase 1 OS=Arabidopsis thaliana GN=ELI5 PE=2 SV=1	fve:101314251/0.0/tyrosine decarboxylase 1; K01592 tyrosine decarboxylase [EC:4.1.1.25]	YPO1193/9e-76/---	PTHR11999/2.6E-207/--	biological_process:GO:0006520//cellular amino acid metabolic process;molecular_function:GO:0016831//carboxy-lyase activity;GO:0030170//pyridoxal phosphate binding;
CL2349.Contig15_All	2352	1.54563	0.000966328	Up	gi|470142864|ref|XP_004307112.1|/0/PREDICTED: uncharacterized protein LOC101307247 [Fragaria vesca subsp. vesca]	gi|349706107|emb|FQ384646.1|/2e-38/Vitis vinifera clone SS0AAG16YP13	NA	fve:101307247/0.0/uncharacterized LOC101307247; K07047 uncharacterized protein	BS_ytcJ/5e-31/---	PTHR22642/9.2E-86/--	NA
Unigene473_All	1556	2.36268	7.45e-08	Up	gi|470108743|ref|XP_004290668.1|/0/PREDICTED: basic 7S globulin 2-like [Fragaria vesca subsp. vesca]	gi|470108742|ref|XM_004290620.1|/0.0/PREDICTED: Fragaria vesca subsp. vesca basic 7S globulin 2-like (LOC101294322), mRNA	sp|Q8RVH5|7SBG2_SOYBN/3e-74/Basic 7S globulin 2 OS=Glycine max PE=1 SV=1	aip:107606484/4e-15/aspartic proteinase nepenthesin-1; K02882 large subunit ribosomal protein L18Ae	NA	PF14543/5.0E-45/Xylanase inhibitor N-terminal	biological_process:GO:0006508//proteolysis;molecular_function:GO:0004190//aspartic-type endopeptidase activity;
Unigene1669_All	775	3.44493	4.06e-06	Up	gi|470114031|ref|XP_004293222.1|/1.52787e-106/PREDICTED: NEDD8-conjugating enzyme Ubc12-like [Fragaria vesca subsp. vesca]	gi|470114030|ref|XM_004293174.1|/0.0/PREDICTED: Fragaria vesca subsp. vesca NEDD8-conjugating enzyme Ubc12-like (LOC101311160), mRNA	sp|Q9SDY5|RCE1_ARATH/5e-76/NEDD8-conjugating enzyme Ubc12 OS=Arabidopsis thaliana GN=RCE1 PE=1 SV=1	fve:101311160/3e-107/NEDD8-conjugating enzyme Ubc12-like; K10579 ubiquitin-conjugating enzyme E2 M	SPBC119.02/3e-19/---	SM00212/4.8E-35/Ubiquitin-conjugating enzyme E2, catalytic domain homologues	molecular_function:GO:0005524//ATP binding;
Unigene31797_All	1240	2.30752	0.00109446	Up	gi|764579746|ref|XP_011463731.1|/0/PREDICTED: protein NRT1/ PTR FAMILY 6.3 isoform X2 [Fragaria vesca subsp. vesca]	gi|470125321|ref|XM_004298604.1|/0.0/PREDICTED: Fragaria vesca subsp. vesca nitrate transporter 1.1-like (LOC101312345), mRNA	sp|Q05085|PTR7_ARATH/5e-131/Protein NRT1/ PTR FAMILY 6.3 OS=Arabidopsis thaliana GN=NPF6.3 PE=1 SV=1	pmum:103337195/9e-174/protein NRT1/ PTR FAMILY 6.3; K14638 solute carrier family 15 (peptide/histidine transporter), member 3/4	SPBC13A2.04c/5e-13/---	PTHR11654:SF97/9.5E-218/--	NA
Unigene53_All	1008	-1.0026	8.34e-08	Down	gi|747067152|ref|XP_011080281.1|/0/PREDICTED: extensin-2-like [Sesamum indicum]	gi|470125116|ref|XR_184594.1|/0.0/PREDICTED: Fragaria vesca subsp. vesca uncharacterized LOC101295621 (LOC101295621), misc_RNA	sp|Q9M1G9|EXTN2_ARATH/4e-139/Extensin-2 OS=Arabidopsis thaliana GN=EXT2 PE=2 SV=1	sind:105163614/2e-88/extensin-2-like; K05747 Wiskott-Aldrich syndrome protein	XF0818/1e-29/---	PR01217/2.9E-11/Proline rich extensin signature	NA
CL5142.Contig2_All	638	2.32549	1.56e-05	Up	gi|764547974|ref|XP_011459741.1|/4.49909e-86/PREDICTED: uncharacterized protein LOC105350071 [Fragaria vesca subsp. vesca]	gi|470112333|ref|XM_004292343.1|/1e-171/PREDICTED: Fragaria vesca subsp. vesca uncharacterized LOC101314914 (LOC101314914), mRNA	NA	NA	NA	PTHR31232:SF2/5.3E-27/--	NA
CL5621.Contig4_All	1208	2.21544	0.00443852	Up	gi|470137491|ref|XP_004304497.1|/2.05086e-166/PREDICTED: serine/threonine-protein phosphatase 7 long form homolog [Fragaria vesca subsp. vesca] &gt;gi|764617684|ref|XP_011468167.1| PREDICTED: serine/threonine-protein phosphatase 7 long form homolog [Fragaria vesca subsp. vesca] &gt;gi|764617689|ref|XP_011468168.1| PREDICTED: serine/threonine-protein phosphatase 7 long form homolog [Fragaria vesca…	gi|470137490|ref|XM_004304449.1|/0.0/PREDICTED: Fragaria vesca subsp. vesca serine/threonine-protein phosphatase 7 long form homolog (LOC101308486), mRNA	NA	NA	NA	NA	NA
CL1656.Contig2_All	1960	1.06371	5.01e-06	Up	gi|470106588|ref|XP_004289646.1|/9.9529e-114/PREDICTED: bifunctional phosphatase IMPL2, chloroplastic [Fragaria vesca subsp. vesca]	gi|470106587|ref|XM_004289598.1|/0.0/PREDICTED: Fragaria vesca subsp. vesca bifunctional phosphatase IMPL2, chloroplastic-like (LOC101290997), mRNA	sp|Q6NPM8|HIS7_ARATH/3e-94/Bifunctional phosphatase IMPL2, chloroplastic OS=Arabidopsis thaliana GN=HISN7 PE=1 SV=1	fve:101290997/2e-114/bifunctional phosphatase IMPL2, chloroplastic; K18649 inositol-phosphate phosphatase / L-galactose 1-phosphate phosphatase / histidinol-phosphatase [EC:3.1.3.25 3.1.3.93 3.1.3.15]	AGl1926/9e-43/---	PF00459/1.3E-37/Inositol monophosphatase family	biological_process:GO:0000105//histidine biosynthetic process;GO:0016311//dephosphorylation;GO:0046854//phosphatidylinositol phosphorylation;cellular_component:GO:0009507//chloroplast;molecular_function:GO:0004401//histidinol-phosphatase activity;GO:0052834//inositol monophosphate phosphatase activity;
Unigene10825_All	1675	2.67826	2.73e-05	Up	gi|470118340|ref|XP_004295289.1|/0/PREDICTED: (-)-germacrene D synthase-like [Fragaria vesca subsp. vesca]	gi|470118339|ref|XM_004295241.1|/0.0/PREDICTED: Fragaria vesca subsp. vesca (-)-germacrene D synthase-like (LOC101303103), mRNA	sp|Q6Q3H3|TPSGD_VITVI/6e-180/(-)-germacrene D synthase OS=Vitis vinifera GN=VIT_19s0014g04930 PE=1 SV=1	fve:101303103/0.0/(-)-germacrene D synthase-like; K15803 (-)-germacrene D synthase [EC:4.2.3.22 4.2.3.75]	NA	PTHR31225:SF1/1.7E-205/--	NA
CL1072.Contig2_All	3198	-1.04923	2.78e-33	Down	gi|470122397|ref|XP_004297228.1|/0/PREDICTED: ninja-family protein AFP2-like [Fragaria vesca subsp. vesca]	gi|470122396|ref|XM_004297180.1|/0.0/PREDICTED: Fragaria vesca subsp. vesca ninja-family protein AFP2-like (LOC101308169), mRNA	sp|Q9LMX5|AFP2_ARATH/7e-75/Ninja-family protein AFP2 OS=Arabidopsis thaliana GN=AFP2 PE=1 SV=1	vvi:104882322/4e-19/extensin-like; K05747 Wiskott-Aldrich syndrome protein	Rv3876/6e-06/---	PF07897/2.2E-90/Protein of unknown function (DUF1675)	NA
Unigene3889_All	1071	-1.65941	3.25e-12	Down	gi|470101761|ref|XP_004287337.1|/5.41132e-128/PREDICTED: fasciclin-like arabinogalactan protein 13 [Fragaria vesca subsp. vesca]	gi|470101760|ref|XM_004287289.1|/0.0/PREDICTED: Fragaria vesca subsp. vesca fasciclin-like arabinogalactan protein 6-like (LOC101301519), mRNA	sp|Q9FFH6|FLA13_ARATH/1e-62/Fasciclin-like arabinogalactan protein 13 OS=Arabidopsis thaliana GN=FLA13 PE=1 SV=1	atr:105420786/1e-19/fasciclin-like arabinogalactan protein 4; K19519 transforming growth factor-beta-induced protein	YPO2725/5e-08/---	PTHR32077/8.6E-90/--	NA
Unigene16030_All	795	1.01212	2.73e-06	Up	gi|470101389|ref|XP_004287155.1|/1.01554e-60/PREDICTED: uncharacterized protein LOC101296797 [Fragaria vesca subsp. vesca]	gi|470101388|ref|XM_004287107.1|/0.0/PREDICTED: Fragaria vesca subsp. vesca uncharacterized LOC101296797 (LOC101296797), mRNA	NA	NA	NA	NA	NA
CL3846.Contig2_All	5607	2.49733	0.00135131	Up	gi|470143006|ref|XP_004307179.1|/0/PREDICTED: tubulin-folding cofactor D isoform X1 [Fragaria vesca subsp. vesca]	gi|470143005|ref|XM_004307131.1|/0.0/PREDICTED: Fragaria vesca subsp. vesca tubulin-specific chaperone D-like (LOC101303742), mRNA	sp|Q8L5R3|TBCD_ARATH/0.0/Tubulin-folding cofactor D OS=Arabidopsis thaliana GN=TFCD PE=2 SV=1	NA	SPBC11C11.04c/9e-46/---	PTHR12658/0.0/--	NA
CL4775.Contig1_All	448	4.28106	8.69e-66	Up	NA	NA	NA	NA	NA	NA	NA
CL1355.Contig5_All	2556	3.24241	2.09e-05	Up	gi|470138392|ref|XP_004304941.1|/0/PREDICTED: translation factor GUF1 homolog, mitochondrial [Fragaria vesca subsp. vesca]	gi|470138391|ref|XM_004304893.1|/0.0/PREDICTED: Fragaria vesca subsp. vesca translation factor GUF1 homolog, mitochondrial-like (LOC101302478), mRNA	sp|B9RUN8|GUF1_RICCO/0.0/Translation factor GUF1 homolog, mitochondrial OS=Ricinus communis GN=RCOM_0855130 PE=3 SV=1	osa:4340102/0.0/EF-4, OsJ_20104; translation factor GUF1 homolog, mitochondrial; K03596 GTP-binding protein LepA	FN0777/0.0/---	PF06421/6.6E-49/GTP-binding protein LepA C-terminus	biological_process:GO:0006355//regulation of transcription, DNA-templated;GO:0045727//positive regulation of translation;GO:0009725//response to hormone;cellular_component:GO:0005759//mitochondrial matrix;GO:0005634//nucleus;molecular_function:GO:0043022//ribosome binding;GO:0003677//DNA binding;GO:0003924//GTPase activity;GO:0005525//GTP binding;
Unigene10302_All	1042	1.57191	0.00507568	Up	gi|764631359|ref|XP_011469643.1|/1.56743e-100/PREDICTED: N-acetylglucosaminyl-phosphatidylinositol de-N-acetylase-like isoform X2 [Fragaria vesca subsp. vesca]	gi|470146318|ref|XM_004308726.1|/0.0/PREDICTED: Fragaria vesca subsp. vesca N-acetylglucosaminyl-phosphatidylinositol de-N-acetylase-like (LOC101291478), mRNA	NA	fve:101291478/8e-101/N-acetylglucosaminyl-phosphatidylinositol de-N-acetylase-like; K03434 N-acetylglucosaminylphosphatidylinositol deacetylase [EC:3.5.1.89]	SPAPB2B4.01c/5e-21/---	PTHR12993/3.3E-61/--	NA
Unigene1709_All	901	2.06689	0.00502406	Up	gi|470110916|ref|XP_004291705.1|/1.55395e-127/PREDICTED: uncharacterized protein LOC101294726 [Fragaria vesca subsp. vesca]	gi|470110915|ref|XM_004291657.1|/0.0/PREDICTED: Fragaria vesca subsp. vesca uncharacterized LOC101294726 (LOC101294726), mRNA	NA	NA	NA	NA	NA
Unigene8018_All	1422	3.78977	9.1e-154	Up	gi|470129285|ref|XP_004300554.1|/3.2374e-161/PREDICTED: probable esterase PIR7A isoform X1 [Fragaria vesca subsp. vesca] &gt;gi|764593000|ref|XP_004300555.2| PREDICTED: probable esterase PIR7A isoform X2 [Fragaria vesca subsp. vesca]	gi|470129284|ref|XM_004300506.1|/0.0/PREDICTED: Fragaria vesca subsp. vesca polyneuridine-aldehyde esterase-like, transcript variant 1 (LOC101306434), mRNA	sp|Q9SE93|PNAE_RAUSE/5e-55/Polyneuridine-aldehyde esterase OS=Rauvolfia serpentina GN=PNAE PE=1 SV=1	ath:AT2G23610/6e-52/MES3; methyl esterase 3; K08233 polyneuridine-aldehyde esterase [EC:3.1.1.78]	NA	PTHR10992/2.1E-102/--	NA
CL1995.Contig3_All	1482	1.3752	0.00488274	Up	gi|764566789|ref|XP_011462040.1|/1.32907e-08/PREDICTED: uncharacterized protein LOC105350798 [Fragaria vesca subsp. vesca]	gi|470136536|ref|XR_185026.1|/0.0/PREDICTED: Fragaria vesca subsp. vesca uncharacterized LOC101312848 (LOC101312848), misc_RNA	NA	NA	NA	NA	NA
Unigene11757_All	1739	4.35709	2.13e-12	Up	gi|470140761|ref|XP_004306107.1|/0/PREDICTED: uncharacterized protein LOC101309574 [Fragaria vesca subsp. vesca]	gi|470140760|ref|XM_004306059.1|/0.0/PREDICTED: Fragaria vesca subsp. vesca uncharacterized LOC101309574 (LOC101309574), mRNA	NA	fve:101309574/0.0/uncharacterized LOC101309574; K01110 phosphatidylinositol-3,4,5-trisphosphate 3-phosphatase and dual-specificity protein phosphatase PTEN [EC:3.1.3.16 3.1.3.48 3.1.3.67]	SPBC609.02/6e-19/---	PF00782/5.3E-9/Dual specificity phosphatase, catalytic domain	biological_process:GO:0009555//pollen development;GO:0035335//peptidyl-tyrosine dephosphorylation;molecular_function:GO:0008138//protein tyrosine/serine/threonine phosphatase activity;GO:0004725//protein tyrosine phosphatase activity;
Unigene2472_All	1041	2.02305	0.00490965	Up	NA	gi|470117915|ref|XM_004295044.1|/6e-55/PREDICTED: Fragaria vesca subsp. vesca uncharacterized LOC101311172 (LOC101311172), mRNA	NA	NA	NA	NA	NA
CL159.Contig3_All	1103	-2.05499	0.00245107	Down	gi|225435718|ref|XP_002283531.1|/3.01835e-105/PREDICTED: probable polyamine transporter At3g13620 [Vitis vinifera]	gi|470117709|ref|XM_004294945.1|/0.0/PREDICTED: Fragaria vesca subsp. vesca probable polyamine transporter At3g13620-like (LOC101304951), mRNA	sp|Q9LHN7|PHSC_ARATH/9e-89/Probable polyamine transporter At3g13620 OS=Arabidopsis thaliana GN=At3g13620 PE=2 SV=1	sind:105162712/1e-06/cationic amino acid transporter 3, mitochondrial-like; K13863 solute carrier family 7 (cationic amino acid transporter), member 1	CC1184/6e-10/---	PTHR11785:SF205/1.6E-91/--	cellular_component:GO:0016021//integral component of membrane;molecular_function:GO:0015171//amino acid transmembrane transporter activity;
CL5624.Contig1_All	1728	2.61182	2.78e-11	Up	gi|470104699|ref|XP_004288734.1|/0/PREDICTED: F-box/kelch-repeat protein At3g23880-like [Fragaria vesca subsp. vesca]	gi|470104698|ref|XM_004288686.1|/0.0/PREDICTED: Fragaria vesca subsp. vesca F-box/kelch-repeat protein At3g06240-like (LOC101295949), mRNA	sp|Q9LIR8|FBK67_ARATH/3e-32/F-box/kelch-repeat protein At3g23880 OS=Arabidopsis thaliana GN=At3g23880 PE=2 SV=1	brp:103856145/3e-26/F-box protein At4g22390; K15030 translation initiation factor 3 subunit M	NA	PF08268/1.2E-4/F-box associated domain	NA
CL525.Contig18_All	2414	-4.78656	3.31e-12	Down	gi|470115759|ref|XP_004294059.1|/0/PREDICTED: DEAD-box ATP-dependent RNA helicase 10 [Fragaria vesca subsp. vesca]	gi|470115758|ref|XM_004294011.1|/0.0/PREDICTED: Fragaria vesca subsp. vesca DEAD-box ATP-dependent RNA helicase 10-like (LOC101306892), mRNA	sp|Q8GY84|RH10_ARATH/1e-159/DEAD-box ATP-dependent RNA helicase 10 OS=Arabidopsis thaliana GN=RH10 PE=2 SV=2	fve:101306892/0.0/DEAD-box ATP-dependent RNA helicase 10; K14777 ATP-dependent RNA helicase DDX47/RRP3 [EC:3.6.4.13]	VCA0204/3e-72/---	SM00490/4.3E-16/helicase superfamily c-terminal domain	molecular_function:GO:0005524//ATP binding;GO:0004386//helicase activity;GO:0003676//nucleic acid binding;
CL6778.Contig2_All	1963	1.73397	5.25e-06	Up	gi|470139700|ref|XP_004305584.1|/0/PREDICTED: aluminum-activated malate transporter 8 [Fragaria vesca subsp. vesca]	gi|470139699|ref|XM_004305536.1|/0.0/PREDICTED: Fragaria vesca subsp. vesca aluminum-activated malate transporter 8-like (LOC101302774), mRNA	sp|Q9SRM9|ALMT8_ARATH/3e-139/Aluminum-activated malate transporter 8 OS=Arabidopsis thaliana GN=ALMT8 PE=3 SV=1	NA	NA	PTHR31086:SF3/5.3E-164/--	NA
Unigene7211_All	2614	2.43883	0.00175066	Up	gi|764606185|ref|XP_011467050.1|/8.07602e-178/PREDICTED: uncharacterized protein LOC101310623 isoform X4 [Fragaria vesca subsp. vesca]	gi|470134895|ref|XM_004303224.1|/0.0/PREDICTED: Fragaria vesca subsp. vesca uncharacterized LOC101310623 (LOC101310623), mRNA	sp|Q9C5E5|DGK5_ARATH/5e-25/Diacylglycerol kinase 5 OS=Arabidopsis thaliana GN=DGK5 PE=2 SV=1	jcu:105646267/1e-47/diacylglycerol kinase 5-like; K00901 diacylglycerol kinase (ATP) [EC:2.7.1.107]	NA	PTHR23155/1.6E-31/--	NA
CL2231.Contig4_All	862	2.54239	7.04e-26	Up	gi|764563270|ref|XP_011461586.1|/8.87675e-77/PREDICTED: branchpoint-bridging protein-like [Fragaria vesca subsp. vesca]	NA	sp|P93329|NO20_MEDTR/4e-07/Early nodulin-20 OS=Medicago truncatula GN=ENOD20 PE=3 SV=1	cre:CHLREDRAFT_32523/1e-05/fatty acid desaturase; K12418 acyl-lipid (7-3)-desaturase (Delta-4 desaturase) [EC:1.14.19.31]	NA	NA	NA
CL3605.Contig1_All	521	-1.45185	7.95e-05	Down	gi|764643316|ref|XP_011471079.1|/5.98844e-30/PREDICTED: uncharacterized protein LOC105353525 [Fragaria vesca subsp. vesca]	gi|392513447|emb|FO082273.1|/6e-35/Bathycoccus prasinos genomic : Chromosome_6	NA	NA	NA	NA	NA
CL898.Contig3_All	1273	1.14867	1.03e-23	Up	gi|645261051|ref|XP_008236108.1|/1.23602e-128/PREDICTED: expansin-like A2 [Prunus mume]	gi|470107410|ref|XM_004289992.1|/0.0/PREDICTED: Fragaria vesca subsp. vesca expansin-like A1-like (LOC101293535), mRNA	sp|Q9LZT4|EXLA1_ARATH/2e-97/Expansin-like A1 OS=Arabidopsis thaliana GN=EXLA1 PE=2 SV=1	NA	NA	PR01225/5.5E-12/Expansin/Lol pI family signature	biological_process:GO:0019953//sexual reproduction;cellular_component:GO:0016020//membrane;GO:0009505//plant-type cell wall;GO:0009506//plasmodesma;GO:0005576//extracellular region;
CL8437.Contig11_All	4487	1.55775	0.000263189	Up	gi|764646348|ref|XP_011457558.1|/1.82026e-138/PREDICTED: TMV resistance protein N-like isoform X1 [Fragaria vesca subsp. vesca] &gt;gi|764646353|ref|XP_011457559.1| PREDICTED: TMV resistance protein N-like isoform X1 [Fragaria vesca subsp. vesca] &gt;gi|764646358|ref|XP_011457560.1| PREDICTED: TMV resistance protein N-like isoform X1 [Fragaria vesca subsp. vesca] &gt;gi|764646363|ref|XP_011457561…	gi|470149463|ref|XM_004310210.1|/0.0/PREDICTED: Fragaria vesca subsp. vesca TMV resistance protein N-like (LOC101296173), mRNA	sp|Q40392|TMVRN_NICGU/1e-52/TMV resistance protein N OS=Nicotiana glutinosa GN=N PE=1 SV=1	gra:105784821/2e-55/TMV resistance protein N-like; K19613 leucine-rich repeat protein SHOC2	NA	NA	NA
CL1100.Contig2_All	2481	1.06764	8.55e-07	Up	gi|764639311|ref|XP_011470580.1|/5.96921e-90/PREDICTED: sterol 24-C-methyltransferase-like [Fragaria vesca subsp. vesca]	gi|470143306|ref|XM_004307273.1|/0.0/PREDICTED: Fragaria vesca subsp. vesca probable fatty acid methyltransferase-like (LOC101300098), mRNA	NA	fve:101300098/1e-90/sterol 24-C-methyltransferase-like; K00574 cyclopropane-fatty-acyl-phospholipid synthase [EC:2.1.1.79]	VC1122/6e-26/---	PF02353/6.7E-31/Mycolic acid cyclopropane synthetase	biological_process:GO:0055114//oxidation-reduction process;GO:0032259//methylation;cellular_component:GO:0005737//cytoplasm;molecular_function:GO:0008757//S-adenosylmethionine-dependent methyltransferase activity;GO:0016491//oxidoreductase activity;
CL5252.Contig2_All	2528	-1.28653	4.66e-56	Down	gi|470121723|ref|XP_004296910.1|/0/PREDICTED: uncharacterized protein LOC101305932 [Fragaria vesca subsp. vesca]	gi|470121722|ref|XM_004296862.1|/0.0/PREDICTED: Fragaria vesca subsp. vesca uncharacterized LOC101305932 (LOC101305932), mRNA	sp|Q5NUF4|HIDM_GLYEC/3e-107/2-hydroxyisoflavanone dehydratase OS=Glycyrrhiza echinata GN=HIDM PE=1 SV=1	vra:106776973/4e-103/2-hydroxyisoflavanone dehydratase-like; K13258 2-hydroxyisoflavanone dehydratase [EC:4.2.1.105]	Rv1400c/5e-16/---	PTHR23024/5.9E-127/--	NA
Unigene1859_All	622	-2.53547	0.0010902	Down	gi|764550592|ref|XP_011460060.1|/3.9387e-108/PREDICTED: microtubule-associated protein 70-5 [Fragaria vesca subsp. vesca]	gi|470118419|ref|XM_004295281.1|/0.0/PREDICTED: Fragaria vesca subsp. vesca microtubule-associated protein 70-5-like (LOC101291706), mRNA	sp|Q8GYX3|MP705_ARATH/1e-76/Microtubule-associated protein 70-5 OS=Arabidopsis thaliana GN=MAP70.5 PE=1 SV=1	NA	NA	PTHR31246/5.2E-68/--	biological_process:GO:0010051//xylem and phloem pattern formation;GO:0007010//cytoskeleton organization;GO:0009832//plant-type cell wall biogenesis;molecular_function:GO:0008017//microtubule binding;
Unigene8869_All	729	-2.3496	1.66e-05	Down	gi|595884788|ref|XP_007213035.1|/8.13174e-27/hypothetical protein PRUPE_ppa023210mg [Prunus persica] &gt;gi|462408900|gb|EMJ14234.1| hypothetical protein PRUPE_ppa023210mg [Prunus persica]	gi|349727574|emb|FQ394070.1|/2e-07/Vitis vinifera clone SS0AFA22YM02	NA	NA	NA	NA	NA
CL4277.Contig1_All	765	2.64531	1.79e-23	Up	gi|470134959|ref|XP_004303303.1|/9.39087e-93/PREDICTED: cucumber peeling cupredoxin-like [Fragaria vesca subsp. vesca]	gi|470134958|ref|XM_004303255.1|/0.0/PREDICTED: Fragaria vesca subsp. vesca cucumber peeling cupredoxin-like (LOC101296402), mRNA	sp|P29602|CPC_CUCSA/4e-26/Cucumber peeling cupredoxin OS=Cucumis sativus PE=1 SV=3	NA	NA	PS00196/-/Type-1 copper (blue) proteins signature.	NA
Unigene10563_All	1148	2.07095	9.56e-09	Up	gi|470143047|ref|XP_004307199.1|/0/PREDICTED: cytosolic sulfotransferase 15-like [Fragaria vesca subsp. vesca]	gi|470143046|ref|XM_004307151.1|/0.0/PREDICTED: Fragaria vesca subsp. vesca cytosolic sulfotransferase 15-like (LOC101309583), mRNA	sp|Q8L5A7|SOT15_ARATH/2e-123/Cytosolic sulfotransferase 15 OS=Arabidopsis thaliana GN=SOT15 PE=1 SV=1	adu:107462931/2e-124/cytosolic sulfotransferase 15-like; K01025	NA	PF00685/5.7E-64/Sulfotransferase domain	molecular_function:GO:0008146//sulfotransferase activity;
CL2147.Contig8_All	857	-1.47711	1.69e-05	Down	gi|470126208|ref|XP_004299084.1|/2.48338e-87/PREDICTED: MADS-box protein SVP-like isoform X2 [Fragaria vesca subsp. vesca]	gi|470126207|ref|XM_004299036.1|/0.0/PREDICTED: Fragaria vesca subsp. vesca MADS-box protein SVP-like (LOC101293783), mRNA	sp|Q9FVC1|SVP_ARATH/4e-29/MADS-box protein SVP OS=Arabidopsis thaliana GN=SVP PE=1 SV=1	pmum:103319500/7e-38/PmDAM2; MADS-box protein JOINTLESS-like; K09260 MADS-box transcription enhancer factor 2A	NA	PS51297/11.452/K-box domain profile.	NA
CL5304.Contig1_All	1493	2.416	0.00193451	Up	gi|470123767|ref|XP_004297892.1|/0/PREDICTED: uncharacterized protein LOC101298310 [Fragaria vesca subsp. vesca] &gt;gi|764568737|ref|XP_011462351.1| PREDICTED: uncharacterized protein LOC101298310 [Fragaria vesca subsp. vesca]	gi|470123766|ref|XM_004297844.1|/0.0/PREDICTED: Fragaria vesca subsp. vesca uncharacterized LOC101298310 (LOC101298310), mRNA	NA	NA	NA	PF04782/1.5E-94/Protein of unknown function (DUF632)	NA
CL1255.Contig19_All	1921	-2.44607	0.00169714	Down	gi|470137836|ref|XP_004304667.1|/3.95351e-33/PREDICTED: uncharacterized protein LOC101309177 [Fragaria vesca subsp. vesca]	gi|470137841|ref|XM_004304622.1|/1e-139/PREDICTED: Fragaria vesca subsp. vesca uncharacterized LOC101310045 (LOC101310045), mRNA	NA	NA	NA	NA	NA
CL3778.Contig8_All	638	-1.37807	1.29e-26	Down	gi|764568010|ref|XP_011462288.1|/5.83526e-110/PREDICTED: glycine-rich cell wall structural protein [Fragaria vesca subsp. vesca]	gi|871769|emb|X87948.1|/2e-13/V.unguiculata mRNA for glycin-rich protein	sp|P09789|GRP1_PETHY/7e-86/Glycine-rich cell wall structural protein 1 OS=Petunia hybrida GN=GRP-1 PE=1 SV=1	aip:107619883/2e-67/formin-like protein 20; K02184 formin 2	XF0818/4e-44/---	PR01228/1.1E-7/Eggshell protein signature	NA
Unigene10752_All	1089	1.12023	0.00517193	Up	NA	NA	NA	NA	NA	NA	NA
Unigene23235_All	723	-1.37502	0.00509144	Down	gi|470146900|ref|XP_004309057.1|/9.24227e-100/PREDICTED: 21 kDa protein-like [Fragaria vesca subsp. vesca]	gi|470146899|ref|XM_004309009.1|/0.0/PREDICTED: Fragaria vesca subsp. vesca 21 kDa protein-like (LOC101312980), mRNA	sp|P17407|21KD_DAUCA/5e-35/21 kDa protein OS=Daucus carota PE=2 SV=1	mtr:MTR_8g023310/4e-21/pectinesterase/pectinesterase inhibitor; K01051 pectinesterase [EC:3.1.1.11]	NA	SM00856/1.1E-45/Plant invertase/pectin methylesterase inhibitor	biological_process:GO:0043086//negative regulation of catalytic activity;molecular_function:GO:0004857//enzyme inhibitor activity;
CL5411.Contig2_All	1954	1.23939	2.21e-06	Up	gi|470127067|ref|XP_004299500.1|/0/PREDICTED: monoglyceride lipase [Fragaria vesca subsp. vesca]	gi|470127066|ref|XM_004299452.1|/0.0/PREDICTED: Fragaria vesca subsp. vesca monoglyceride lipase-like (LOC101298223), mRNA	sp|Q9C942|CSE_ARATH/3e-31/Caffeoylshikimate esterase OS=Arabidopsis thaliana GN=CSE PE=1 SV=1	fve:101298223/0.0/monoglyceride lipase; K01054 acylglycerol lipase [EC:3.1.1.23]	Rv0183/3e-32/---	PF12146/6.8E-25/Putative lysophospholipase	cellular_component:GO:0016021//integral component of membrane;
CL3778.Contig5_All	2239	-1.0547	1.38e-68	Down	gi|21322711|emb|CAD22154.1|/0/pherophorin-dz1 protein [Volvox carteri f. nagariensis]	gi|186452943|gb|AC144481.8|/1e-23/Medicago truncatula clone mth2-35e10, complete sequence	sp|P10496|GRP2_PHAVU/6e-147/Glycine-rich cell wall structural protein 1.8 OS=Phaseolus vulgaris PE=2 SV=1	aip:107619883/1e-136/formin-like protein 20; K02184 formin 2	XF0818/1e-45/---	NA	NA
Unigene23702_All	697	-2.15816	0.00288642	Down	gi|764630409|ref|XP_011469535.1|/2.19615e-44/PREDICTED: uncharacterized protein LOC105352972 [Fragaria vesca subsp. vesca]	gi|470140937|ref|XM_004306145.1|/2e-53/PREDICTED: Fragaria vesca subsp. vesca uncharacterized LOC101291367 (LOC101291367), mRNA	NA	NA	NA	PF13456/4.9E-17/Reverse transcriptase-like	NA
CL3484.Contig1_All	4453	1.20794	4.2e-14	Up	gi|764549598|ref|XP_011459978.1|/0/PREDICTED: abnormal spindle-like microcephaly-associated protein homolog [Fragaria vesca subsp. vesca]	gi|470118281|ref|XM_004295212.1|/0.0/PREDICTED: Fragaria vesca subsp. vesca abnormal spindle-like microcephaly-associated protein homolog (LOC101294448), mRNA	sp|Q9LKB9|MYO6_ARATH/2e-08/Myosin-6 OS=Arabidopsis thaliana GN=XI-2 PE=1 SV=1	fve:101294448/0.0/abnormal spindle-like microcephaly-associated protein homolog; K16743 abnormal spindle-like microcephaly-associated protein	NA	PS50176/11.007/Armadillo/plakoglobin ARM repeat profile.	NA
CL1104.Contig1_All	2789	-1.43111	4.01e-06	Down	gi|470148816|ref|XP_004309944.1|/0/PREDICTED: probable linoleate 9S-lipoxygenase 5 [Fragaria vesca subsp. vesca]	gi|470148815|ref|XM_004309896.1|/0.0/PREDICTED: Fragaria vesca subsp. vesca probable linoleate 9S-lipoxygenase 5-like (LOC101311821), mRNA	sp|Q43191|LOX15_SOLTU/0.0/Probable linoleate 9S-lipoxygenase 5 OS=Solanum tuberosum GN=LOX1.5 PE=2 SV=1	fve:101311821/0.0/probable linoleate 9S-lipoxygenase 5; K15718 linoleate 9S-lipoxygenase [EC:1.13.11.58]	NA	PTHR11771/0.0/--	biological_process:GO:0006633//fatty acid biosynthetic process;GO:0055114//oxidation-reduction process;GO:0031408//oxylipin biosynthetic process;molecular_function:GO:0016702//oxidoreductase activity, acting on single donors with incorporation of molecular oxygen, incorporation of two atoms of oxygen;GO:0046872//metal ion binding;
CL8707.Contig3_All	1619	1.45896	0.00509378	Up	gi|470115868|ref|XP_004294113.1|/6.19904e-127/PREDICTED: tubby-like F-box protein 7 [Fragaria vesca subsp. vesca]	gi|470115867|ref|XM_004294065.1|/0.0/PREDICTED: Fragaria vesca subsp. vesca tubby-like F-box protein 7-like (LOC101297810), mRNA	sp|Q93VI8|TLP7_ARATH/3e-98/Tubby-like F-box protein 7 OS=Arabidopsis thaliana GN=TULP7 PE=2 SV=1	bna:106363425/7e-42/tubby-like F-box protein 1; K19600 tubby-related protein 1	NA	PTHR16517:SF25/6.6E-144/--	NA
CL100.Contig7_All	2631	1.31215	0.00286411	Up	gi|764565862|ref|XP_011461880.1|/0/PREDICTED: probable 28S rRNA (cytosine-C(5))-methyltransferase isoform X1 [Fragaria vesca subsp. vesca] &gt;gi|764565865|ref|XP_011461881.1| PREDICTED: probable 28S rRNA (cytosine-C(5))-methyltransferase isoform X1 [Fragaria vesca subsp. vesca]	gi|470118124|ref|XM_004295141.1|/0.0/PREDICTED: Fragaria vesca subsp. vesca ribosomal RNA small subunit methyltransferase B-like (LOC101293469), mRNA	sp|Q9SI78|PPR93_ARATH/1e-16/Pentatricopeptide repeat-containing protein At1g62720 OS=Arabidopsis thaliana GN=At1g62720 PE=2 SV=1	fve:101293469/0.0/probable 28S rRNA (cytosine-C(5))-methyltransferase; K03500 16S rRNA (cytosine967-C5)-methyltransferase [EC:2.1.1.176]	BH2507/5e-56/---	PR02008/1.7E-21/RNA (C5-cytosine) methyltransferase signature	biological_process:GO:0031167//rRNA methylation;GO:0006355//regulation of transcription, DNA-templated;molecular_function:GO:0003723//RNA binding;GO:0008649//rRNA methyltransferase activity;
Unigene20760_All	891	3.79287	6.06e-35	Up	gi|470146969|ref|XP_004309090.1|/1.35575e-75/PREDICTED: uncharacterized protein LOC101300973 [Fragaria vesca subsp. vesca]	gi|470146968|ref|XM_004309042.1|/0.0/PREDICTED: Fragaria vesca subsp. vesca uncharacterized LOC101300973 (LOC101300973), mRNA	NA	NA	NA	NA	cellular_component:GO:0016021//integral component of membrane;
Unigene20779_All	882	-1.34112	3.02e-147	Down	gi|764575908|ref|XP_011463134.1|/3.50919e-99/PREDICTED: LOW QUALITY PROTEIN: MLP-like protein 34 [Fragaria vesca subsp. vesca]	gi|470124956|ref|XR_184590.1|/0.0/PREDICTED: Fragaria vesca subsp. vesca MLP-like protein 28-like (LOC101294261), misc_RNA	sp|Q9SSK7|MLP34_ARATH/4e-48/MLP-like protein 34 OS=Arabidopsis thaliana GN=MLP34 PE=2 SV=1	NA	NA	PF00407/1.8E-55/Pathogenesis-related protein Bet v I family	biological_process:GO:0006952//defense response;GO:0009607//response to biotic stimulus;
CL808.Contig5_All	1349	1.53998	0.000605595	Up	gi|657991196|ref|XP_008387823.1|/2.25608e-140/PREDICTED: aldo-keto reductase family 4 member C9-like isoform X2 [Malus domestica]	gi|470133717|ref|XR_184887.1|/0.0/PREDICTED: Fragaria vesca subsp. vesca aldo-keto reductase family 4 member C9-like (LOC101308884), misc_RNA	sp|Q0PGJ6|AKRC9_ARATH/2e-121/Aldo-keto reductase family 4 member C9 OS=Arabidopsis thaliana GN=AKR4C9 PE=1 SV=1	thj:104806544/1e-118/aldo-keto reductase family 4 member C9-like; K00011 aldehyde reductase [EC:1.1.1.21]	slr0942/8e-68/---	PF00248/2.3E-53/Aldo/keto reductase family	NA
CL1380.Contig20_All	4077	-2.59826	0.000850659	Down	gi|764576366|ref|XP_011463186.1|/0/PREDICTED: gamma-tubulin complex component 6 isoform X1 [Fragaria vesca subsp. vesca]	gi|470125035|ref|XR_184593.1|/0.0/PREDICTED: Fragaria vesca subsp. vesca uncharacterized LOC101306719 (LOC101306719), misc_RNA	NA	fve:101306719/0.0/gamma-tubulin complex component 6; K16573 gamma-tubulin complex component 6	NA	PTHR19302:SF34/1.8E-96/--	biological_process:GO:0000226//microtubule cytoskeleton organization;cellular_component:GO:0015630//microtubule cytoskeleton;GO:0044430//cytoskeletal part;
CL1415.Contig7_All	3393	-1.22569	2.28e-07	Down	gi|470129350|ref|XP_004300584.1|/0/PREDICTED: BEL1-like homeodomain protein 2 [Fragaria vesca subsp. vesca] &gt;gi|764593234|ref|XP_011465451.1| PREDICTED: BEL1-like homeodomain protein 2 [Fragaria vesca subsp. vesca] &gt;gi|764593238|ref|XP_011465452.1| PREDICTED: BEL1-like homeodomain protein 2 [Fragaria vesca subsp. vesca]	gi|470129349|ref|XM_004300536.1|/0.0/PREDICTED: Fragaria vesca subsp. vesca BEL1-like homeodomain protein 4-like (LOC101291436), mRNA	sp|Q9SW80|BLH2_ARATH/1e-174/BEL1-like homeodomain protein 2 OS=Arabidopsis thaliana GN=BLH2 PE=1 SV=3	bdi:100844103/1e-70/homeobox protein BEL1 homolog; K16670 homeobox protein Meis2	NA	PTHR11850/4.2E-153/--	NA
CL282.Contig1_All	2589	-1.15224	8.87e-07	Down	gi|764645015|ref|XP_011457426.1|/0/PREDICTED: cleavage and polyadenylation specificity factor subunit 6-like [Fragaria vesca subsp. vesca]	gi|470148935|ref|XM_004309955.1|/0.0/PREDICTED: Fragaria vesca subsp. vesca uncharacterized LOC101309507 (LOC101309507), mRNA	sp|Q05966|GRP10_BRANA/4e-19/Glycine-rich RNA-binding protein 10 OS=Brassica napus GN=GRP10 PE=1 SV=1	fve:101309793/0.0/cleavage and polyadenylation specificity factor subunit 6-like; K14398 cleavage and polyadenylation specificity factor subunit 6/7	XF0818/3e-10/---	PTHR24012/6.7E-65/--	molecular_function:GO:0000166//nucleotide binding;GO:0003676//nucleic acid binding;
Unigene1263_All	1300	-1.072	0.000182718	Down	gi|764517511|ref|XP_011466782.1|/9.58881e-149/PREDICTED: protein MKS1 [Fragaria vesca subsp. vesca]	gi|470106088|ref|XM_004289360.1|/0.0/PREDICTED: Fragaria vesca subsp. vesca protein MKS1-like (LOC101314802), mRNA	sp|Q8LGD5|MKS1_ARATH/2e-31/Protein MKS1 OS=Arabidopsis thaliana GN=MKS1 PE=1 SV=2	sly:101262608/3e-17/formin-like protein 20; K02184 formin 2	YPO2725/2e-10/---	PF05678/3.2E-12/VQ motif	NA
CL8834.Contig2_All	2590	4.01257	1.66e-161	Up	gi|470119390|ref|XP_004295797.1|/0/PREDICTED: COBRA-like protein 10 [Fragaria vesca subsp. vesca]	gi|470119389|ref|XM_004295749.1|/0.0/PREDICTED: Fragaria vesca subsp. vesca COBRA-like protein 11-like (LOC101290747), mRNA	sp|Q9LJU0|CBL10_ARATH/0.0/COBRA-like protein 10 OS=Arabidopsis thaliana GN=COBL10 PE=2 SV=1	obr:102718200/4e-19/preprotein translocase subunit SECY, chloroplastic; K10956 protein transport protein SEC61 subunit alpha	NA	PTHR31052/0.0/--	biological_process:GO:0010215//cellulose microfibril organization;GO:0016049//cell growth;cellular_component:GO:0016021//integral component of membrane;GO:0031225//anchored component of membrane;
Unigene13037_All	1558	1.25809	1.47e-05	Up	gi|764587226|ref|XP_011464752.1|/0/PREDICTED: protein NRT1/ PTR FAMILY 5.10-like [Fragaria vesca subsp. vesca]	gi|470131079|ref|XM_004301378.1|/0.0/PREDICTED: Fragaria vesca subsp. vesca uncharacterized LOC101310523 (LOC101310523), mRNA	sp|Q0WP01|PTR9_ARATH/4e-136/Protein NRT1/ PTR FAMILY 5.10 OS=Arabidopsis thaliana GN=NPF5.10 PE=2 SV=1	fve:101310523/0.0/protein NRT1/ PTR FAMILY 5.10-like; K14638 solute carrier family 15 (peptide/histidine transporter), member 3/4	ECU11g1050/6e-28/---	PF00854/1.0E-66/POT family	biological_process:GO:0006857//oligopeptide transport;cellular_component:GO:0016021//integral component of membrane;molecular_function:GO:0005215//transporter activity;
CL3048.Contig1_All	649	-1.0061	9.94e-07	Down	gi|970027197|ref|XP_015074904.1|/9.43678e-15/PREDICTED: glycine-rich RNA-binding protein blt801-like [Solanum pennellii]	NA	sp|P21997|SSGP_VOLCA/4e-07/Sulfated surface glycoprotein 185 OS=Volvox carteri PE=1 SV=1	sind:105157953/2e-06/formin-like protein 20; K02184 formin 2	CC3494_1/9e-06/---	NA	NA
CL1008.Contig4_All	1437	1.48462	0.000456819	Up	gi|470149012|ref|XP_004310039.1|/0/PREDICTED: cytochrome P450 71A25-like isoform X1 [Fragaria vesca subsp. vesca]	gi|470148498|ref|XM_004309751.1|/0.0/PREDICTED: Fragaria vesca subsp. vesca cytochrome P450 71A4-like (LOC101304445), mRNA	sp|Q9STL1|C71AM_ARATH/2e-126/Cytochrome P450 71A22 OS=Arabidopsis thaliana GN=CYP71A22 PE=2 SV=1	mdm:103428276/5e-161/cytochrome P450 71A3-like; K00512 steroid 17alpha-monooxygenase / 17alpha-hydroxyprogesterone aldolase [EC:1.14.14.19 4.1.2.30]	alr1450/3e-19/---	PR00463/4.4E-34/E-class P450 group I signature	NA
CL1644.Contig2_All	1194	-1.26744	3.58e-08	Down	NA	NA	NA	NA	NA	NA	NA
CL6591.Contig3_All	2851	-3.73951	3.18e-07	Down	gi|764641836|ref|XP_011470906.1|/0/PREDICTED: N6-adenosine-methyltransferase MT-A70-like isoform X1 [Fragaria vesca subsp. vesca]	gi|470148043|ref|XM_004309537.1|/0.0/PREDICTED: Fragaria vesca subsp. vesca N6-adenosine-methyltransferase MT-A70-like (LOC101294526), mRNA	sp|Q6EU10|MTA70_ORYSJ/2e-153/Probable N6-adenosine-methyltransferase MT-A70-like OS=Oryza sativa subsp. japonica GN=Os02g0672600 PE=2 SV=1	fve:101294526/0.0/N6-adenosine-methyltransferase MT-A70-like; K05925 mRNA (2'-O-methyladenosine-N6-)-methyltransferase [EC:2.1.1.62]	YGL192w/1e-72/---	PTHR12829/2.5E-21/--	biological_process:GO:0006139//nucleobase-containing compound metabolic process;GO:0032259//methylation;molecular_function:GO:0008168//methyltransferase activity;
Unigene15477_All	1810	4.0451	6.16e-86	Up	gi|470130843|ref|XP_004301311.1|/0/PREDICTED: aspartic proteinase nepenthesin-2-like [Fragaria vesca subsp. vesca]	gi|470130842|ref|XM_004301263.1|/0.0/PREDICTED: Fragaria vesca subsp. vesca aspartic proteinase nepenthesin-1-like (LOC101313028), mRNA	sp|Q766C3|NEP1_NEPGR/3e-38/Aspartic proteinase nepenthesin-1 OS=Nepenthes gracilis GN=nep1 PE=1 SV=1	adu:107496420/3e-47/aspartic proteinase nepenthesin-1; K02882 large subunit ribosomal protein L18Ae	NA	PTHR13683:SF280/5.6E-94/--	NA
CL2509.Contig1_All	1644	2.62044	0	Up	gi|470133092|ref|XP_004302408.1|/1.8109e-65/PREDICTED: EG45-like domain containing protein [Fragaria vesca subsp. vesca]	gi|470133091|ref|XM_004302360.1|/0.0/PREDICTED: Fragaria vesca subsp. vesca EG45-like domain containing protein-like (LOC101314673), mRNA	sp|Q9ZP41|EGC_CITJA/4e-43/EG45-like domain containing protein OS=Citrus jambhiri GN=CjBAp12 PE=1 SV=1	egr:104415905/2e-10/uncharacterized LOC104415905; K14771 U3 small nucleolar RNA-associated protein 19	NA	PS50842/12.58/Expansin, family-45 endoglucanase-like domain profile.	NA
Unigene2955_All	1440	2.40092	0.000952024	Up	gi|764532214|ref|XP_011458438.1|/3.90578e-45/PREDICTED: uncharacterized protein LOC105349729 isoform X2 [Fragaria vesca subsp. vesca]	gi|470137143|ref|XR_185063.1|/0.0/PREDICTED: Fragaria vesca subsp. vesca uncharacterized LOC101304401 (LOC101304401), misc_RNA	NA	NA	NA	NA	NA
Unigene1191_All	2307	3.75215	6.63e-184	Up	gi|764508721|ref|XP_004288880.2|/0/PREDICTED: uncharacterized protein LOC101300395 [Fragaria vesca subsp. vesca]	gi|470105006|ref|XM_004288832.1|/0.0/PREDICTED: Fragaria vesca subsp. vesca uncharacterized LOC101300395 (LOC101300395), mRNA	NA	NA	NA	PF09118/8.9E-23/Domain of unknown function (DUF1929)	NA
Unigene1580_All	1638	3.72808	3.3e-15	Up	gi|470119408|ref|XP_004295806.1|/0/PREDICTED: serine/threonine-protein kinase PBS1-like [Fragaria vesca subsp. vesca]	gi|470119407|ref|XM_004295758.1|/0.0/PREDICTED: Fragaria vesca subsp. vesca serine/threonine-protein kinase PBS1-like (LOC101293966), mRNA	sp|Q9FE20|PBS1_ARATH/1e-138/Serine/threonine-protein kinase PBS1 OS=Arabidopsis thaliana GN=PBS1 PE=1 SV=1	rcu:8260797/7e-180/serine/threonine-protein kinase CDL1; K04733 interleukin-1 receptor-associated kinase 4 [EC:2.7.11.1]	CAC1728_1/2e-17/---	PS50011/36.881/Protein kinase domain profile.	biological_process:GO:0006468//protein phosphorylation;molecular_function:GO:0004674//protein serine/threonine kinase activity;GO:0005524//ATP binding;
CL3346.Contig2_All	933	-2.60253	0.00081326	Down	gi|470117214|ref|XP_004294756.1|/1.54609e-133/PREDICTED: 28S ribosomal protein S29, mitochondrial [Fragaria vesca subsp. vesca]	gi|470117213|ref|XM_004294708.1|/0.0/PREDICTED: Fragaria vesca subsp. vesca uncharacterized LOC101304552 (LOC101304552), mRNA	NA	fve:101304552/3e-134/28S ribosomal protein S29, mitochondrial; K17408 small subunit ribosomal protein S29	NA	PF10236/2.9E-21/Mitochondrial ribosomal death-associated protein 3	NA
Unigene20275_All	1373	4.97052	1.4e-71	Up	gi|470142352|ref|XP_004306875.1|/0/PREDICTED: probable fructokinase-7 [Fragaria vesca subsp. vesca]	gi|349704858|emb|FQ383818.1|/3e-79/Vitis vinifera clone SS0ABG14YJ07	sp|Q9M1B9|SCRK4_ARATH/4e-118/Probable fructokinase-4 OS=Arabidopsis thaliana GN=At3g59480 PE=2 SV=1	fve:101304321/0.0/probable fructokinase-7; K00847 fructokinase [EC:2.7.1.4]	BH1857/2e-62/---	PR00990/8.7E-7/Ribokinase signature	biological_process:GO:0046835//carbohydrate phosphorylation;GO:0006014//D-ribose metabolic process;molecular_function:GO:0004747//ribokinase activity;
CL2323.Contig7_All	4118	1.0089	1.37e-31	Up	gi|470131548|ref|XP_004301655.1|/0/PREDICTED: cellulose synthase-like protein D3 [Fragaria vesca subsp. vesca]	gi|470131547|ref|XM_004301607.1|/0.0/PREDICTED: Fragaria vesca subsp. vesca cellulose synthase-like protein D3-like (LOC101292423), mRNA	sp|Q9M9M4|CSLD3_ARATH/0.0/Cellulose synthase-like protein D3 OS=Arabidopsis thaliana GN=CSLD3 PE=1 SV=1	jcu:105642579/0.0/cellulose synthase-like protein D5; K00770 1,4-beta-D-xylan synthase [EC:2.4.2.24]	alr3757/2e-14/---	PF14570/2.0E-15/RING/Ubox like zinc-binding domain	biological_process:GO:0030244//cellulose biosynthetic process;GO:0071555//cell wall organization;cellular_component:GO:0016021//integral component of membrane;molecular_function:GO:0016760//cellulose synthase (UDP-forming) activity;
CL5711.Contig1_All	623	-1.49821	1.29e-17	Down	gi|595859528|ref|XP_007210964.1|/8.4249e-18/hypothetical protein PRUPE_ppa023135mg [Prunus persica] &gt;gi|462406699|gb|EMJ12163.1| hypothetical protein PRUPE_ppa023135mg [Prunus persica]	gi|470130768|ref|XM_004301227.1|/1e-165/PREDICTED: Fragaria vesca subsp. vesca lipid phosphate phosphatase 2-like (LOC101301113), mRNA	NA	NA	NA	NA	NA
CL4222.Contig3_All	527	-1.62063	0.00490193	Down	gi|764627331|ref|XP_011469233.1|/3.49569e-65/PREDICTED: homeobox-leucine zipper protein HAT3 isoform X1 [Fragaria vesca subsp. vesca]	gi|470142610|ref|XM_004306949.1|/0.0/PREDICTED: Fragaria vesca subsp. vesca homeobox-leucine zipper protein HAT3-like (LOC101293520), mRNA	sp|P46602|HAT3_ARATH/2e-31/Homeobox-leucine zipper protein HAT3 OS=Arabidopsis thaliana GN=HAT3 PE=2 SV=2	fve:101293520/7e-66/homeobox-leucine zipper protein HAT3; K09338 homeobox-leucine zipper protein	NA	PF02183/8.4E-17/Homeobox associated leucine zipper	biological_process:GO:0006355//regulation of transcription, DNA-templated;cellular_component:GO:0005634//nucleus;molecular_function:GO:0043565//sequence-specific DNA binding;GO:0003700//transcription factor activity, sequence-specific DNA binding;
Unigene8822_All	796	-1.16685	1.96e-05	Down	gi|764551375|ref|XP_011460154.1|/1.08753e-54/PREDICTED: uncharacterized protein LOC105350228 [Fragaria vesca subsp. vesca]	gi|148539141|dbj|AK247907.1|/6e-08/Solanum lycopersicum cDNA, clone: LEFL2043N24, HTC in fruit	NA	NA	NA	NA	cellular_component:GO:0016020//membrane;
Unigene8127_All	2112	-1.44682	1.86e-11	Down	gi|470124629|ref|XP_004298313.1|/0/PREDICTED: piriformospora indica-insensitive protein 2-like [Fragaria vesca subsp. vesca]	gi|470124628|ref|XM_004298265.1|/0.0/PREDICTED: Fragaria vesca subsp. vesca piriformospora indica-insensitive protein 2-like (LOC101291237), mRNA	sp|Q5PP26|PII2_ARATH/3e-126/Piriformospora indica-insensitive protein 2 OS=Arabidopsis thaliana GN=PII-2 PE=2 SV=1	sot:102593118/2e-33/LRR receptor-like serine/threonine-protein kinase FLS2; K13420 LRR receptor-like serine/threonine-protein kinase FLS2 [EC:2.7.11.1]	RSp0875/3e-12/---	PTHR24420/1.5E-72/--	NA
Unigene20240_All	1684	-1.94376	4.23e-09	Down	gi|470101403|ref|XP_004287162.1|/0/PREDICTED: UDP-glycosyltransferase 74E1-like [Fragaria vesca subsp. vesca]	gi|470101402|ref|XM_004287114.1|/0.0/PREDICTED: Fragaria vesca subsp. vesca UDP-glycosyltransferase 74E1-like (LOC101298821), mRNA	sp|P0C7P7|U74E1_ARATH/2e-116/UDP-glycosyltransferase 74E1 OS=Arabidopsis thaliana GN=UGT74E1 PE=3 SV=1	nnu:104586812/1e-128/UDP-glycosyltransferase 74F2-like; K13691 pathogen-inducible salicylic acid glucosyltransferase [EC:2.4.1.-]	NA	PS00375/-/UDP-glycosyltransferases signature.	NA
CL127.Contig14_All	5726	-2.71129	0.000492101	Down	gi|764597276|ref|XP_011466158.1|/0/PREDICTED: kinesin-4-like isoform X2 [Fragaria vesca subsp. vesca]	gi|470138257|ref|XR_185091.1|/0.0/PREDICTED: Fragaria vesca subsp. vesca kinesin-4-like (LOC101304022), misc_RNA	sp|O81635|ATK4_ARATH/0.0/Kinesin-4 OS=Arabidopsis thaliana GN=ATK4 PE=1 SV=2	fve:101304022/0.0/kinesin-4-like; K10406 kinesin family member C2/C3	SPAC664.10/2e-68/---	SM00129/5.5E-141/Kinesin motor, catalytic domain. ATPase.	molecular_function:GO:0000166//nucleotide binding;
Unigene24590_All	1055	-2.85459	0.000218778	Down	gi|764568264|ref|XP_011462309.1|/4.35841e-90/PREDICTED: uncharacterized protein LOC105350943 [Fragaria vesca subsp. vesca]	gi|470121606|ref|XM_004296806.1|/2e-30/PREDICTED: Fragaria vesca subsp. vesca bidirectional sugar transporter SWEET17-like (LOC101313503), mRNA	NA	sly:101254580/3e-06/DEAD-box ATP-dependent RNA helicase 42; K12811 ATP-dependent RNA helicase DDX46/PRP5 [EC:3.6.4.13]	NA	PTHR14237/7.8E-31/--	NA
CL1644.Contig1_All	1250	-1.8241	0.000409423	Down	NA	NA	NA	NA	NA	NA	NA
Unigene6277_All	967	-1.54002	6.23e-14	Down	gi|595829559|ref|XP_007205896.1|/8.48917e-74/hypothetical protein PRUPE_ppa011366mg [Prunus persica] &gt;gi|462401538|gb|EMJ07095.1| hypothetical protein PRUPE_ppa011366mg [Prunus persica]	gi|147861655|emb|AM470478.2|/4e-28/Vitis vinifera contig VV78X183888.10, whole genome shotgun sequence	sp|Q99090|CPRF2_PETCR/6e-11/Light-inducible protein CPRF2 OS=Petroselinum crispum GN=CPRF2 PE=2 SV=2	mus:103972996/1e-08/transcription factor HBP-1a-like isoform X1; K09060 plant G-box-binding factor	NA	PF00170/4.7E-8/bZIP transcription factor	biological_process:GO:0006355//regulation of transcription, DNA-templated;molecular_function:GO:0043565//sequence-specific DNA binding;GO:0003700//transcription factor activity, sequence-specific DNA binding;
CL4352.Contig3_All	1541	-1.38835	2.8e-15	Down	gi|764620794|ref|XP_011468551.1|/3.35998e-167/PREDICTED: LOW QUALITY PROTEIN: probable F-box protein At1g60180 [Fragaria vesca subsp. vesca]	gi|470113827|ref|XM_004293073.1|/1e-135/PREDICTED: Fragaria vesca subsp. vesca F-box protein At2g27310-like (LOC101301650), mRNA	sp|Q9XIN8|FB119_ARATH/2e-78/F-box protein At2g27310 OS=Arabidopsis thaliana GN=At2g27310 PE=2 SV=1	dosa:Os04t0498700-01/7e-15/Os04g0498700; Haem peroxidase family protein.; K00430 peroxidase [EC:1.11.1.7]	Cgl1939/5e-11/---	PF12937/2.5E-6/F-box-like	NA
CL4487.Contig2_All	616	3.03564	3.05e-11	Up	gi|470149012|ref|XP_004310039.1|/8.42461e-47/PREDICTED: cytochrome P450 71A25-like isoform X1 [Fragaria vesca subsp. vesca]	gi|470148500|ref|XR_185484.1|/1e-170/PREDICTED: Fragaria vesca subsp. vesca cytochrome P450 71A2-like (LOC101304735), misc_RNA	sp|P37118|C71A2_SOLME/1e-27/Cytochrome P450 71A2 OS=Solanum melongena GN=CYP71A2 PE=2 SV=1	fve:101307280/8e-36/cytochrome P450 71A1-like; K00512 steroid 17alpha-monooxygenase / 17alpha-hydroxyprogesterone aldolase [EC:1.14.14.19 4.1.2.30]	SMc02579/2e-07/---	PTHR24298/6.8E-47/--	NA
Unigene16095_All	2057	-1.89165	1.41e-42	Down	gi|764598983|ref|XP_011466326.1|/0/PREDICTED: uncharacterized protein LOC105352058 [Fragaria vesca subsp. vesca]	gi|51535750|dbj|AP004792.3|/7e-10/Oryza sativa Japonica Group genomic DNA, chromosome 6, PAC clone:P0505A04	sp|Q6NMR8|FAF3_ARATH/2e-10/Protein FANTASTIC FOUR 3 OS=Arabidopsis thaliana GN=FAF3 PE=2 SV=1	csv:101218373/4e-13/nucleolin; K13161 heterogeneous nuclear ribonucleoprotein R	NA	PF11250/3.6E-22/Protein of unknown function (DUF3049)	NA
CL8257.Contig1_All	1501	-4.02202	1.41e-32	Down	gi|764606618|ref|XP_011467093.1|/2.22609e-107/PREDICTED: LOW QUALITY PROTEIN: ethylene-responsive transcription factor WIN1-like [Fragaria vesca subsp. vesca]	gi|470134987|ref|XR_184943.1|/0.0/PREDICTED: Fragaria vesca subsp. vesca ethylene-responsive transcription factor WIN1-like (LOC101300460), misc_RNA	sp|Q9XI33|WIN1_ARATH/2e-67/Ethylene-responsive transcription factor WIN1 OS=Arabidopsis thaliana GN=WIN1 PE=2 SV=1	gmx:100800489/7e-20/pathogenesis-related genes transcriptional activator PTI6-like; K13434 pathogenesis-related genes transcriptional activator PTI6	NA	PTHR31194/2.5E-60/--	biological_process:GO:0006355//regulation of transcription, DNA-templated;cellular_component:GO:0005634//nucleus;molecular_function:GO:0003677//DNA binding;GO:0003700//transcription factor activity, sequence-specific DNA binding;
Unigene12922_All	728	-2.05771	0.000158317	Down	gi|470149254|ref|XP_004310154.1|/4.26211e-68/PREDICTED: protein TRANSPARENT TESTA 12-like [Fragaria vesca subsp. vesca]	gi|470149253|ref|XM_004310106.1|/0.0/PREDICTED: Fragaria vesca subsp. vesca protein TRANSPARENT TESTA 12-like (LOC101307660), mRNA	sp|Q9LYT3|TT12_ARATH/2e-27/Protein TRANSPARENT TESTA 12 OS=Arabidopsis thaliana GN=TT12 PE=2 SV=1	fve:101307660/8e-69/protein TRANSPARENT TESTA 12-like; K03327 multidrug resistance protein, MATE family	SPAC11D3.06/4e-10/---	NA	biological_process:GO:0006855//drug transmembrane transport;cellular_component:GO:0016021//integral component of membrane;molecular_function:GO:0015238//drug transmembrane transporter activity;GO:0015297//antiporter activity;
Unigene413_All	2106	2.28772	2.84e-07	Up	gi|702336750|ref|XP_010055601.1|/1.28204e-21/PREDICTED: cytochrome P450 87A3-like isoform X1 [Eucalyptus grandis]	gi|470125524|ref|XM_004298704.1|/1e-133/PREDICTED: Fragaria vesca subsp. vesca cytochrome P450 87A3-like (LOC101292599), mRNA	sp|Q7XU38|C87A3_ORYSJ/6e-16/Cytochrome P450 87A3 OS=Oryza sativa subsp. japonica GN=CYP87A3 PE=2 SV=3	gra:105765194/1e-21/cytochrome P450 87A3-like; K07437 cytochrome P450, family 26, subfamily A	NA	PTHR24286/1.9E-17/--	NA
CL2828.Contig2_All	4757	1.36781	0.000104798	Up	gi|470143230|ref|XP_004307284.1|/0/PREDICTED: putative ABC transporter C family member 15 isoform X1 [Fragaria vesca subsp. vesca]	gi|470143229|ref|XM_004307236.1|/0.0/PREDICTED: Fragaria vesca subsp. vesca ABC transporter C family member 9-like (LOC101313352), mRNA	sp|Q9M1C7|AB9C_ARATH/0.0/ABC transporter C family member 9 OS=Arabidopsis thaliana GN=ABCC9 PE=2 SV=2	adu:107467800/0.0/ABC transporter C family member 10-like; K05666 ATP-binding cassette, subfamily C (CFTR/MRP), member 2	YDR135c/0.0/---	PTHR24223:SF165/0.0/--	NA
Unigene29074_All	2137	2.14168	0.0021752	Up	NA	gi|470134634|ref|XM_004303105.1|/0.0/PREDICTED: Fragaria vesca subsp. vesca uncharacterized LOC101295247 (LOC101295247), mRNA	NA	NA	NA	NA	NA
CL3474.Contig2_All	1302	-2.29877	0.00316408	Down	gi|470119914|ref|XP_004296055.1|/0/PREDICTED: glucan endo-1,3-beta-glucosidase 9 [Fragaria vesca subsp. vesca]	gi|470119913|ref|XM_004296007.1|/0.0/PREDICTED: Fragaria vesca subsp. vesca glucan endo-1,3-beta-glucosidase 9-like (LOC101290942), mRNA	sp|Q9FGH4|E139_ARATH/9e-139/Glucan endo-1,3-beta-glucosidase 9 OS=Arabidopsis thaliana GN=At5g58480 PE=1 SV=1	gmx:100796552/4e-84/glucan endo-1,3-beta-glucosidase 5-like; K19893 glucan endo-1,3-beta-glucosidase 5/6 [EC:3.2.1.39]	NA	SM00768/7.9E-32/Possibly involved in carbohydrate binding	biological_process:GO:0005975//carbohydrate metabolic process;cellular_component:GO:0016021//integral component of membrane;GO:0046658//anchored component of plasma membrane;molecular_function:GO:0004553//hydrolase activity, hydrolyzing O-glycosyl compounds;
CL1544.Contig3_All	6736	4.72908	1.58e-11	Up	gi|764532884|ref|XP_011458491.1|/0/PREDICTED: microtubule-associated protein futsch-like isoform X4 [Fragaria vesca subsp. vesca]	gi|470112589|ref|XM_004292467.1|/0.0/PREDICTED: Fragaria vesca subsp. vesca uncharacterized LOC101309798 (LOC101309798), mRNA	NA	pvu:PHAVU_011G024500g/6e-09/hypothetical protein; K20283 golgin subfamily A member 4	NA	NA	NA
Unigene3786_All	1245	-1.17047	5.4e-20	Down	gi|470102491|ref|XP_004287687.1|/1.31146e-107/PREDICTED: RING-H2 finger protein ATL2 [Fragaria vesca subsp. vesca]	gi|470102490|ref|XM_004287639.1|/0.0/PREDICTED: Fragaria vesca subsp. vesca RING-H2 finger protein ATL47-like (LOC101311605), mRNA	sp|Q9LY41|ATL4_ARATH/9e-13/E3 ubiquitin-protein ligase ATL4 OS=Arabidopsis thaliana GN=ATL4 PE=1 SV=1	adu:107472726/6e-14/E3 ubiquitin-protein ligase RHA1B-like; K16281 RING-H2 zinc finger protein RHA1	NA	PF13639/1.2E-14/Ring finger domain	NA
CL8266.Contig2_All	3469	1.38608	2.59e-24	Up	gi|470101367|ref|XP_004287144.1|/0/PREDICTED: cellulose synthase A catalytic subunit 7 [UDP-forming] [Fragaria vesca subsp. vesca]	gi|470101366|ref|XM_004287096.1|/0.0/PREDICTED: Fragaria vesca subsp. vesca cellulose synthase A catalytic subunit 7 [UDP-forming]-like (LOC101293708), mRNA	sp|Q9SWW6|CESA7_ARATH/0.0/Cellulose synthase A catalytic subunit 7 [UDP-forming] OS=Arabidopsis thaliana GN=CESA7 PE=1 SV=1	fve:101293708/0.0/cellulose synthase A catalytic subunit 7 [UDP-forming]; K10999 cellulose synthase A [EC:2.4.1.12]	alr3757/4e-19/---	PTHR13301:SF34/0.0/--	biological_process:GO:0010400//rhamnogalacturonan I side chain metabolic process;GO:0030244//cellulose biosynthetic process;GO:0009834//plant-type secondary cell wall biogenesis;cellular_component:GO:0016021//integral component of membrane;GO:0005886//plasma membrane;GO:0009507//chloroplast;molecular_function:GO:0016760//cellulose synthase (UDP-forming) activity;GO:0008270//zinc ion binding;
CL8618.Contig1_All	1425	1.12552	1.05e-123	Up	gi|824769771|gb|AKI88059.1|/0/dihydroflavonol 4-reductase [Fragaria pentaphylla]	gi|470111241|ref|XM_004291810.1|/0.0/PREDICTED: Fragaria vesca subsp. vesca bifunctional dihydroflavonol 4-reductase/flavanone 4-reductase-like (LOC101293459), mRNA	sp|Q9XES5|DFRA_MALDO/3e-178/Bifunctional dihydroflavonol 4-reductase/flavanone 4-reductase OS=Malus domestica GN=DFR PE=1 SV=1	mdm:103450464/5e-177/DFR, DFR-2, FNR, pDFR; bifunctional dihydroflavonol 4-reductase/flavanone 4-reductase (EC:1.1.1.219 1.1.1.234); K13082 bifunctional dihydroflavonol 4-reductase/flavanone 4-reductase [EC:1.1.1.219 1.1.1.234]	SA0317/1e-29/---	PF01370/4.0E-25/NAD dependent epimerase/dehydratase family	molecular_function:GO:0003824//catalytic activity;GO:0050662//coenzyme binding;
Unigene7173_All	2072	6.63528	6.67e-62	Up	gi|764566302|ref|XP_011461949.1|/0/PREDICTED: LOW QUALITY PROTEIN: exopolygalacturonase [Fragaria vesca subsp. vesca]	gi|470118462|ref|XM_004295302.1|/0.0/PREDICTED: Fragaria vesca subsp. vesca exopolygalacturonase clone GBGA483-like (LOC101298405), mRNA	sp|P49063|PGLR2_ARATH/3e-129/Exopolygalacturonase clone GBGA483 OS=Arabidopsis thaliana GN=At3g07850 PE=2 SV=2	fve:101298405/0.0/exopolygalacturonase; K01213 galacturan 1,4-alpha-galacturonidase [EC:3.2.1.67]	CAC3684/2e-18/---	PTHR31375/5.7E-175/--	NA
CL8413.Contig1_All	1584	-2.00711	2.4e-39	Down	gi|470127518|ref|XP_004299716.1|/0/PREDICTED: 1-aminocyclopropane-1-carboxylate oxidase homolog 4-like [Fragaria vesca subsp. vesca]	gi|470127517|ref|XM_004299668.1|/0.0/PREDICTED: Fragaria vesca subsp. vesca 1-aminocyclopropane-1-carboxylate oxidase homolog 6-like (LOC101290767), mRNA	sp|P93824|ACCH6_ARATH/4e-82/1-aminocyclopropane-1-carboxylate oxidase homolog 6 OS=Arabidopsis thaliana GN=At1g04350 PE=2 SV=1	zma:541977/3e-65/bx6; benzoxazin 6 (EC:1.14.20.2); K13229 2,4-dihydroxy-1,4-benzoxazin-3-one-glucoside dioxygenase [EC:1.14.20.2]	PA4191/4e-20/---	PS51471/11.647/Fe(2+) 2-oxoglutarate dioxygenase domain profile.	NA
CL1638.Contig3_All	1439	3.80537	4.57e-41	Up	gi|764524973|ref|XP_011457848.1|/8.79267e-114/PREDICTED: LIM domain-containing protein WLIM1-like isoform X2 [Fragaria vesca subsp. vesca] &gt;gi|764524978|ref|XP_011457849.1| PREDICTED: LIM domain-containing protein WLIM1-like isoform X2 [Fragaria vesca subsp. vesca] &gt;gi|764524984|ref|XP_011457850.1| PREDICTED: LIM domain-containing protein WLIM1-like isoform X2 [Fragaria vesca subsp. vesca]	gi|470106871|ref|XM_004289732.1|/0.0/PREDICTED: Fragaria vesca subsp. vesca pollen-specific protein SF3-like (LOC101309106), mRNA	sp|P29675|SF3_HELAN/3e-77/Pollen-specific protein SF3 OS=Helianthus annuus GN=SF3 PE=2 SV=1	fve:101309106/5e-113/LIM domain-containing protein WLIM1-like; K09377 cysteine and glycine-rich protein	NA	SM00132/6.1E-11/Zinc-binding domain present in Lin-11, Isl-1, Mec-3.	NA
CL5555.Contig5_All	1321	2.35941	0.000547375	Up	gi|764644269|ref|XP_011457341.1|/0/PREDICTED: D-3-phosphoglycerate dehydrogenase 2, chloroplastic [Fragaria vesca subsp. vesca] &gt;gi|764644272|ref|XP_011457342.1| PREDICTED: D-3-phosphoglycerate dehydrogenase 2, chloroplastic [Fragaria vesca subsp. vesca] &gt;gi|764644276|ref|XP_011457343.1| PREDICTED: D-3-phosphoglycerate dehydrogenase 2, chloroplastic [Fragaria vesca subsp. vesca] &gt;gi|7646…	gi|470148768|ref|XM_004309875.1|/0.0/PREDICTED: Fragaria vesca subsp. vesca d-3-phosphoglycerate dehydrogenase-like (LOC101302226), mRNA	sp|O04130|SERA_ARATH/1e-25/D-3-phosphoglycerate dehydrogenase, chloroplastic OS=Arabidopsis thaliana GN=At1g17745 PE=1 SV=2	gsl:Gasu_01690/2e-29/D-3-phosphoglycerate dehydrogenase (EC:1.1.1.95); K00058 D-3-phosphoglycerate dehydrogenase [EC:1.1.1.95]	AF0813/1e-34/---	PS00671/-/D-isomer specific 2-hydroxyacid dehydrogenases signature 3.	NA
CL2100.Contig3_All	2908	1.30029	6.81e-05	Up	gi|470142633|ref|XP_004307008.1|/7.2644e-159/PREDICTED: uncharacterized protein LOC101296896 [Fragaria vesca subsp. vesca] &gt;gi|764627469|ref|XP_011469249.1| PREDICTED: uncharacterized protein LOC101296896 [Fragaria vesca subsp. vesca] &gt;gi|764627474|ref|XP_011469250.1| PREDICTED: uncharacterized protein LOC101296896 [Fragaria vesca subsp. vesca] &gt;gi|764627478|ref|XP_011469251.1| PREDICTED…	gi|470142632|ref|XM_004306960.1|/0.0/PREDICTED: Fragaria vesca subsp. vesca uncharacterized LOC101296896 (LOC101296896), mRNA	sp|Q8RXD6|BRE1A_ARATH/1e-27/E3 ubiquitin-protein ligase BRE1-like 1 OS=Arabidopsis thaliana GN=HUB1 PE=1 SV=1	fve:101296605/6e-61/E3 ubiquitin-protein ligase BRE1-like 1; K10696 E3 ubiquitin-protein ligase BRE1 [EC:2.3.2.27]	NA	PTHR23163/3.8E-43/--	NA
CL387.Contig6_All	2670	-1.32571	3.27e-05	Down	gi|470117286|ref|XP_004294792.1|/0/PREDICTED: acyltransferase-like protein At1g54570, chloroplastic isoform X1 [Fragaria vesca subsp. vesca]	gi|470117285|ref|XM_004294744.1|/0.0/PREDICTED: Fragaria vesca subsp. vesca acyltransferase-like protein At1g54570, chloroplastic-like (LOC101314733), mRNA	sp|Q9ZVN2|Y1457_ARATH/2e-132/Acyltransferase-like protein At1g54570, chloroplastic OS=Arabidopsis thaliana GN=At1g54570 PE=2 SV=1	mdm:103414142/1e-24/splicing factor 3B subunit 1-like; K12828 splicing factor 3B subunit 1	Rv1920/6e-10/---	PTHR22753/3.8E-213/--	NA
Unigene10492_All	2542	1.1387	0.00466396	Up	gi|764528024|ref|XP_011458084.1|/0/PREDICTED: uncharacterized protein At1g04910 [Fragaria vesca subsp. vesca]	gi|470112140|ref|XM_004292248.1|/0.0/PREDICTED: Fragaria vesca subsp. vesca uncharacterized LOC101306883 (LOC101306883), mRNA	sp|Q8W486|Y1491_ARATH/2e-67/Uncharacterized protein At1g04910 OS=Arabidopsis thaliana GN=At1g04910 PE=2 SV=1	mdm:103446271/7e-114/uncharacterized LOC103446271; K13506 glycerol-3-phosphate O-acyltransferase 3/4 [EC:2.3.1.15]	NA	PF10250/3.4E-88/GDP-fucose protein O-fucosyltransferase	NA
CL5314.Contig1_All	693	2.4625	8.6e-05	Up	gi|764619278|ref|XP_011468329.1|/1.897e-59/PREDICTED: classical arabinogalactan protein 10-like [Fragaria vesca subsp. vesca]	NA	sp|Q9M0S4|AGP10_ARATH/4e-06/Classical arabinogalactan protein 10 OS=Arabidopsis thaliana GN=AGP10 PE=1 SV=1	bdi:100835054/9e-06/proline-rich receptor-like protein kinase PERK4; K04730 interleukin-1 receptor-associated kinase 1 [EC:2.7.11.1]	NA	NA	NA
Unigene15602_All	2399	3.65917	2.55e-10	Up	gi|470105604|ref|XP_004289172.1|/0/PREDICTED: transcription factor GAMYB [Fragaria vesca subsp. vesca]	gi|470105603|ref|XM_004289124.1|/0.0/PREDICTED: Fragaria vesca subsp. vesca uncharacterized LOC101300860 (LOC101300860), mRNA	sp|Q0JIC2|GAM1_ORYSJ/3e-59/Transcription factor GAMYB OS=Oryza sativa subsp. japonica GN=GAM1 PE=2 SV=1	fve:101300860/0.0/transcription factor GAMYB; K09422 myb proto-oncogene protein, plant	ECU11g1690/5e-27/---	PTHR10641/1.6E-90/--	NA
CL2456.Contig1_All	1919	1.16055	2.05e-12	Up	gi|470114277|ref|XP_004293342.1|/0/PREDICTED: EH domain-containing protein 1-like [Fragaria vesca subsp. vesca]	gi|470114276|ref|XM_004293294.1|/0.0/PREDICTED: Fragaria vesca subsp. vesca EH domain-containing protein 1-like (LOC101309036), mRNA	NA	fve:101309036/0.0/EH domain-containing protein 1-like; K12483 EH domain-containing protein 1	NA	PS50222/9.771/EF-hand calcium-binding domain profile.	biological_process:GO:0051260//protein homooligomerization;GO:0032956//regulation of actin cytoskeleton organization;GO:0006897//endocytosis;cellular_component:GO:0043231//intracellular membrane-bounded organelle;GO:0009506//plasmodesma;GO:0005737//cytoplasm;GO:0005886//plasma membrane;molecular_function:GO:0005509//calcium ion binding;GO:0005525//GTP binding;
CL109.Contig16_All	1531	1.37729	0.000134747	Up	gi|470115259|ref|XP_004293820.1|/3.2889e-98/PREDICTED: mitochondrial amidoxime reducing component 2-like [Fragaria vesca subsp. vesca] &gt;gi|764554683|ref|XP_011460528.1| PREDICTED: mitochondrial amidoxime reducing component 2-like [Fragaria vesca subsp. vesca]	gi|470115258|ref|XM_004293772.1|/0.0/PREDICTED: Fragaria vesca subsp. vesca MOSC domain-containing protein 2, mitochondrial-like (LOC101307096), mRNA	NA	NA	PA3022/9e-15/---	PS51340/9.513/MOSC domain profile.	NA
CL869.Contig1_All	1346	1.17542	0.0029279	Up	gi|470126320|ref|XP_004299136.1|/7.99863e-138/PREDICTED: U-box domain-containing protein 52-like isoform X1 [Fragaria vesca subsp. vesca]	gi|470126319|ref|XM_004299088.1|/0.0/PREDICTED: Fragaria vesca subsp. vesca U-box domain-containing protein 35-like (LOC101310994), mRNA	sp|Q8GUH1|PUB33_ARATH/7e-11/U-box domain-containing protein 33 OS=Arabidopsis thaliana GN=PUB33 PE=2 SV=2	fve:101301302/6e-15/uncharacterized LOC101301302; K14497 protein phosphatase 2C [EC:3.1.3.16]	NA	PTHR31964:SF10/4.4E-30/--	NA
Unigene13746_All	705	4.0511	1.62e-83	Up	gi|645277778|ref|XP_008243935.1|/5.44384e-09/PREDICTED: uncharacterized protein LOC103342130 [Prunus mume]	NA	NA	NA	NA	NA	NA
CL2147.Contig5_All	670	-2.30278	2.35e-06	Down	gi|470126208|ref|XP_004299084.1|/2.33509e-67/PREDICTED: MADS-box protein SVP-like isoform X2 [Fragaria vesca subsp. vesca]	gi|470126207|ref|XM_004299036.1|/0.0/PREDICTED: Fragaria vesca subsp. vesca MADS-box protein SVP-like (LOC101293783), mRNA	sp|Q9FVC1|SVP_ARATH/1e-20/MADS-box protein SVP OS=Arabidopsis thaliana GN=SVP PE=1 SV=1	pmum:103319500/2e-27/PmDAM2; MADS-box protein JOINTLESS-like; K09260 MADS-box transcription enhancer factor 2A	NA	PF01486/2.5E-12/K-box region	NA
CL604.Contig1_All	1285	-1.54942	2.08e-30	Down	gi|645241587|ref|XP_008227147.1|/1.79263e-107/PREDICTED: extensin-2-like [Prunus mume]	gi|49182257|gb|AY639876.1|/1e-34/Lupinus angustifolius serine/proline-rich repeat protein gene, complete cds	sp|Q9T0K5|LRX3_ARATH/2e-81/Leucine-rich repeat extensin-like protein 3 OS=Arabidopsis thaliana GN=LRX3 PE=1 SV=1	aip:107619883/5e-68/formin-like protein 20; K02184 formin 2	XF0818/2e-31/---	PR01217/1.1E-10/Proline rich extensin signature	NA
Unigene22654_All	1608	1.0518	6.9e-05	Up	gi|470141586|ref|XP_004306511.1|/0/PREDICTED: cytochrome P450 705A20 [Fragaria vesca subsp. vesca]	gi|470141585|ref|XM_004306463.1|/0.0/PREDICTED: Fragaria vesca subsp. vesca cytochrome P450 705A20-like (LOC101314020), mRNA	sp|Q9FI39|THAD_ARATH/8e-119/Cytochrome P450 705A5 OS=Arabidopsis thaliana GN=CYP705A5 PE=2 SV=1	pxb:103945840/0.0/cytochrome P450 705A5-like; K00512 steroid 17alpha-monooxygenase / 17alpha-hydroxyprogesterone aldolase [EC:1.14.14.19 4.1.2.30]	BH0579/3e-29/---	PS00086/-/Cytochrome P450 cysteine heme-iron ligand signature.	biological_process:GO:0055114//oxidation-reduction process;cellular_component:GO:0016021//integral component of membrane;molecular_function:GO:0016705//oxidoreductase activity, acting on paired donors, with incorporation or reduction of molecular oxygen;GO:0020037//heme binding;GO:0005506//iron ion binding;GO:0004497//monooxygenase activity;
CL433.Contig4_All	2981	4.08945	1.35e-08	Up	gi|470109733|ref|XP_004291145.1|/0/PREDICTED: far upstream element-binding protein 2-like [Fragaria vesca subsp. vesca]	gi|470109732|ref|XM_004291097.1|/0.0/PREDICTED: Fragaria vesca subsp. vesca uncharacterized LOC101291690 (LOC101291690), mRNA	sp|P13983|EXTN_TOBAC/4e-20/Extensin OS=Nicotiana tabacum GN=HRGPNT3 PE=2 SV=1	fve:101291690/0.0/far upstream element-binding protein 2-like; K13210 far upstream element-binding protein	Rv3876/5e-10/---	PS50084/17.171/Type-1 KH domain profile.	molecular_function:GO:0003676//nucleic acid binding;
CL6572.Contig1_All	1405	2.37348	0.000132675	Up	gi|764639500|ref|XP_004307556.2|/4.61613e-152/PREDICTED: uncharacterized protein LOC101301142 [Fragaria vesca subsp. vesca]	gi|470143799|ref|XM_004307508.1|/0.0/PREDICTED: Fragaria vesca subsp. vesca uncharacterized LOC101301142 (LOC101301142), mRNA	sp|Q9SFZ3|BH110_ARATH/2e-17/Transcription factor bHLH110 OS=Arabidopsis thaliana GN=BHLH110 PE=2 SV=2	fve:101301142/8e-153/uncharacterized LOC101301142; K05765 cofilin	NA	PS50888/9.642/Myc-type, basic helix-loop-helix (bHLH) domain profile.	NA
CL3190.Contig2_All	5631	-1.63303	0	Down	gi|764539678|ref|XP_011459012.1|/0/PREDICTED: helicase and polymerase-containing protein TEBICHI [Fragaria vesca subsp. vesca]	gi|470113303|ref|XM_004292816.1|/0.0/PREDICTED: Fragaria vesca subsp. vesca DNA polymerase theta-like (LOC101308155), mRNA	sp|Q08298|RD22_ARATH/8e-130/Dehydration-responsive protein RD22 OS=Arabidopsis thaliana GN=RD22 PE=2 SV=1	fve:101308155/0.0/helicase and polymerase-containing protein TEBICHI; K02349 DNA polymerase theta [EC:2.7.7.7]	CAC1098_2/6e-58/---	PTHR10133:SF27/1.1E-155/--	biological_process:GO:2000011//regulation of adaxial/abaxial pattern formation;GO:0010468//regulation of gene expression;GO:0009640//photomorphogenesis;GO:0009933//meristem structural organization;GO:1990067//intrachromosomal DNA recombination;GO:0071897//DNA biosynthetic process;GO:0051301//cell division;GO:1902749//regulation of cell cycle G2/M phase transition;GO:0006261//DNA-dependent DNA rep…
Unigene17741_All	1144	-1.15609	0.00311052	Down	gi|470114536|ref|XP_004293470.1|/4.96528e-58/PREDICTED: uncharacterized GPI-anchored protein At4g28100 [Fragaria vesca subsp. vesca]	gi|470114535|ref|XM_004293422.1|/0.0/PREDICTED: Fragaria vesca subsp. vesca uncharacterized LOC101296546 (LOC101296546), mRNA	sp|Q9SUC9|UGPI7_ARATH/7e-33/Uncharacterized GPI-anchored protein At4g28100 OS=Arabidopsis thaliana GN=At4g28100 PE=1 SV=1	cam:101506267/2e-09/uncharacterized LOC101506267; K17964 leucine-rich PPR motif-containing protein, mitochondrial	NA	NA	cellular_component:GO:0046658//anchored component of plasma membrane;
Unigene10810_All	2553	3.2567	2.98e-15	Up	gi|470105243|ref|XP_004288996.1|/0/PREDICTED: pollen receptor-like kinase 3 [Fragaria vesca subsp. vesca]	gi|470105242|ref|XM_004288948.1|/0.0/PREDICTED: Fragaria vesca subsp. vesca probable inactive leucine-rich repeat receptor-like protein kinase At5g20690-like (LOC101292638), mRNA	sp|Q3E991|Y5269_ARATH/3e-178/Probable inactive leucine-rich repeat receptor-like protein kinase At5g20690 OS=Arabidopsis thaliana GN=At5g20690 PE=2 SV=4	pxb:103967685/1e-111/probably inactive leucine-rich repeat receptor-like protein kinase At1g50610; K04730 interleukin-1 receptor-associated kinase 1 [EC:2.7.11.1]	Cgl2127_1/6e-12/---	PF13855/3.0E-7/Leucine rich repeat	cellular_component:GO:0016020//membrane;
Unigene22670_All	1246	2.24258	4.16e-09	Up	gi|470146926|ref|XP_004309070.1|/3.17485e-178/PREDICTED: protein EXORDIUM-like [Fragaria vesca subsp. vesca]	gi|470146925|ref|XM_004309022.1|/0.0/PREDICTED: Fragaria vesca subsp. vesca uncharacterized LOC101293151 (LOC101293151), mRNA	NA	mdm:103418195/1e-23/nucleoporin SEH1-like; K14299 nucleoporin SEH1	NA	PF04674/3.1E-73/Phosphate-induced protein 1 conserved region	NA
Unigene22657_All	1578	-1.52945	0.00237404	Down	gi|470138058|ref|XP_004304776.1|/1.78899e-147/PREDICTED: TMV resistance protein N-like [Fragaria vesca subsp. vesca]	gi|470145663|ref|XM_004308407.1|/0.0/PREDICTED: Fragaria vesca subsp. vesca TMV resistance protein N-like (LOC101299537), mRNA	sp|Q40392|TMVRN_NICGU/5e-84/TMV resistance protein N OS=Nicotiana glutinosa GN=N PE=1 SV=1	nnu:104601536/1e-95/TMV resistance protein N-like; K19613 leucine-rich repeat protein SHOC2	MA2301_1/8e-06/---	PF00560/0.011/Leucine Rich Repeat	NA
CL1618.Contig2_All	817	2.64687	3.44e-20	Up	gi|470125420|ref|XP_004298700.1|/1.04938e-84/PREDICTED: major allergen Pru ar 1-like [Fragaria vesca subsp. vesca]	gi|470125419|ref|XM_004298652.1|/0.0/PREDICTED: Fragaria vesca subsp. vesca major allergen Pru ar 1-like (LOC101301870), mRNA	sp|O50001|PRU1_PRUAR/5e-71/Major allergen Pru ar 1 OS=Prunus armeniaca PE=1 SV=1	NA	NA	PF00407/7.3E-36/Pathogenesis-related protein Bet v I family	biological_process:GO:0006952//defense response;GO:0009607//response to biotic stimulus;
CL5004.Contig1_All	1931	4.89264	1.37e-16	Up	gi|802701180|ref|XP_012083900.1|/2.10131e-07/PREDICTED: uncharacterized protein LOC105643399 [Jatropha curcas]	gi|470115016|ref|XM_004293652.1|/4e-08/PREDICTED: Fragaria vesca subsp. vesca coatomer subunit epsilon-2-like (LOC101296841), mRNA	NA	pmum:103325314/8e-06/coatomer subunit epsilon-1; K17268 coatomer subunit epsilon	NA	NA	NA
CL9270.Contig2_All	4286	1.27975	4.83e-14	Up	gi|764586544|ref|XP_011464661.1|/0/PREDICTED: chromosome-associated kinesin KIF4A [Fragaria vesca subsp. vesca]	gi|470130949|ref|XM_004301316.1|/0.0/PREDICTED: Fragaria vesca subsp. vesca chromosome-associated kinesin KIF4A-like (LOC101308878), mRNA	sp|P46869|FLA10_CHLRE/2e-75/Kinesin-like protein FLA10 OS=Chlamydomonas reinhardtii GN=FLA10 PE=1 SV=1	fve:101308878/0.0/chromosome-associated kinesin KIF4A; K10395 kinesin family member 4/21/27	YBL063w/6e-60/---	PS50067/115.584/Kinesin motor domain profile.	biological_process:GO:0007018//microtubule-based movement;cellular_component:GO:0009506//plasmodesma;molecular_function:GO:0005524//ATP binding;GO:0003777//microtubule motor activity;GO:0008017//microtubule binding;
Unigene4242_All	2140	3.77168	1.58e-17	Up	gi|764583868|ref|XP_011464339.1|/0/PREDICTED: uncharacterized protein LOC105351519 [Fragaria vesca subsp. vesca]	gi|147842423|emb|AM440710.2|/3e-12/Vitis vinifera contig VV78X022685.7, whole genome shotgun sequence	NA	NA	NA	SM01054/1.6E-21/Plant calmodulin-binding domain	NA
Unigene10678_All	1166	1.13549	0.00102606	Up	NA	NA	NA	NA	NA	NA	NA
CL361.Contig2_All	1013	1.02719	0.000211119	Up	gi|470140104|ref|XP_004305784.1|/4.66365e-118/PREDICTED: uncharacterized protein LOC101297865 [Fragaria vesca subsp. vesca]	gi|470140103|ref|XM_004305736.1|/0.0/PREDICTED: Fragaria vesca subsp. vesca uncharacterized LOC101297865 (LOC101297865), mRNA	NA	NA	NA	NA	NA
CL3843.Contig6_All	1352	1.61933	2.38e-05	Up	gi|470132865|ref|XP_004302295.1|/0/PREDICTED: galactinol synthase 2-like [Fragaria vesca subsp. vesca]	gi|470132864|ref|XM_004302247.1|/0.0/PREDICTED: Fragaria vesca subsp. vesca galactinol synthase 2-like, transcript variant 1 (LOC101306059), mRNA	sp|C7G304|GOLS2_SOLLC/8e-151/Galactinol synthase 2 OS=Solanum lycopersicum GN=GOLS2 PE=2 SV=1	fve:101306059/0.0/galactinol synthase 2-like; K18819 inositol 3-alpha-galactosyltransferase [EC:2.4.1.123]	SPBC4C3.08/4e-12/---	PF01501/2.1E-66/Glycosyl transferase family 8	molecular_function:GO:0016757//transferase activity, transferring glycosyl groups;
Unigene7137_All	623	2.33937	5.92e-06	Up	NA	NA	NA	NA	NA	NA	NA
CL8655.Contig6_All	505	1.39846	0.00374479	Up	NA	gi|470115407|ref|XR_184205.1|/2e-06/PREDICTED: Fragaria vesca subsp. vesca uncharacterized LOC101303592 (LOC101303592), misc_RNA	NA	NA	NA	NA	NA
Unigene26646_All	436	-1.95592	0.000122531	Down	gi|470112639|ref|XP_004292539.1|/1.55379e-48/PREDICTED: protein TRANSPARENT TESTA 12-like [Fragaria vesca subsp. vesca]	gi|470112638|ref|XM_004292491.1|/1e-162/PREDICTED: Fragaria vesca subsp. vesca protein TRANSPARENT TESTA 12-like (LOC101293752), mRNA	sp|Q9LYT3|TT12_ARATH/3e-14/Protein TRANSPARENT TESTA 12 OS=Arabidopsis thaliana GN=TT12 PE=2 SV=1	fve:101293752/3e-49/protein TRANSPARENT TESTA 12-like; K03327 multidrug resistance protein, MATE family	NA	PTHR11206/6.6E-15/--	NA
CL3384.Contig1_All	2907	-1.02138	1.17e-27	Down	gi|470112785|ref|XP_004292611.1|/0/PREDICTED: probable LRR receptor-like serine/threonine-protein kinase RKF3 [Fragaria vesca subsp. vesca]	gi|470112784|ref|XM_004292563.1|/0.0/PREDICTED: Fragaria vesca subsp. vesca probable LRR receptor-like serine/threonine-protein kinase RKF3-like (LOC101295683), mRNA	sp|P93050|RKF3_ARATH/0.0/Probable LRR receptor-like serine/threonine-protein kinase RKF3 OS=Arabidopsis thaliana GN=RKF3 PE=2 SV=1	vra:106764556/4e-81/probable receptor-like protein kinase At1g11050; K04733 interleukin-1 receptor-associated kinase 4 [EC:2.7.11.1]	YPO2725/8e-19/---	SM00220/4.2E-34/Serine/Threonine protein kinases, catalytic domain	biological_process:GO:0006468//protein phosphorylation;cellular_component:GO:0016021//integral component of membrane;molecular_function:GO:0004674//protein serine/threonine kinase activity;GO:0005524//ATP binding;
Unigene13914_All	2365	-1.18259	3.43e-38	Down	gi|470144316|ref|XP_004307805.1|/0/PREDICTED: beta-fructofuranosidase, soluble isoenzyme I-like [Fragaria vesca subsp. vesca]	gi|470144315|ref|XM_004307757.1|/0.0/PREDICTED: Fragaria vesca subsp. vesca beta-fructofuranosidase, soluble isoenzyme I-like, transcript variant 1 (LOC101302788), mRNA	sp|P80065|INVB_DAUCA/0.0/Beta-fructofuranosidase, soluble isoenzyme I OS=Daucus carota GN=INV*DC4 PE=1 SV=2	fve:101302788/0.0/beta-fructofuranosidase, soluble isoenzyme I-like; K01193 beta-fructofuranosidase [EC:3.2.1.26]	BS_sacC/1e-43/---	PTHR31953:SF1/1.1E-294/--	NA
CL4179.Contig2_All	1069	-1.06522	3e-05	Down	gi|764576483|ref|XP_011463194.1|/3.2306e-165/PREDICTED: polygalacturonase At1g48100 [Fragaria vesca subsp. vesca]	gi|470122893|ref|XM_004297425.1|/0.0/PREDICTED: Fragaria vesca subsp. vesca polygalacturonase At1g48100-like (LOC101305550), mRNA	sp|Q949Z1|PGLR4_ARATH/5e-81/Polygalacturonase At1g48100 OS=Arabidopsis thaliana GN=At1g48100 PE=2 SV=1	dosa:Os05t0578600-01/9e-124/Os05g0578600; Similar to Polygalacturonase PG2.; K01213 galacturan 1,4-alpha-galacturonidase [EC:3.2.1.67]	YJR153w/2e-18/---	PS00502/-/Polygalacturonase active site.	biological_process:GO:0005975//carbohydrate metabolic process;GO:0071555//cell wall organization;cellular_component:GO:0005576//extracellular region;molecular_function:GO:0004650//polygalacturonase activity;
Unigene5835_All	1996	-1.62241	1.39e-12	Down	gi|470120989|ref|XP_004296568.1|/3.24502e-152/PREDICTED: senescence-associated carboxylesterase 101-like isoform X1 [Fragaria vesca subsp. vesca]	gi|470120988|ref|XM_004296520.1|/2e-13/PREDICTED: Fragaria vesca subsp. vesca uncharacterized LOC101293969 (LOC101293969), mRNA	sp|Q4F883|SG101_ARATH/4e-77/Senescence-associated carboxylesterase 101 OS=Arabidopsis thaliana GN=SAG101 PE=1 SV=1	vvi:100233033/1e-26/EDS1; enhanced disease susceptibility 1; K18875 enhanced disease susceptibility 1 protein	NA	PF01764/3.2E-13/Lipase (class 3)	NA
Unigene3741_All	1263	-1.20172	9.27e-06	Down	gi|470108964|ref|XP_004290772.1|/1.3577e-176/PREDICTED: desiccation-related protein PCC13-62-like [Fragaria vesca subsp. vesca]	gi|470108963|ref|XM_004290724.1|/0.0/PREDICTED: Fragaria vesca subsp. vesca desiccation-related protein PCC13-62-like (LOC101301634), mRNA	sp|P22242|DRPE_CRAPL/2e-61/Desiccation-related protein PCC13-62 OS=Craterostigma plantagineum PE=2 SV=1	smo:SELMODRAFT_441539/1e-13/hypothetical protein; K01206 alpha-L-fucosidase [EC:3.2.1.51]	NA	PF13668/5.5E-24/Ferritin-like domain	NA
CL4884.Contig2_All	1383	2.49061	3.92e-05	Up	NA	gi|470148780|ref|XM_004309881.1|/2e-21/PREDICTED: Fragaria vesca subsp. vesca uncharacterized LOC101304245 (LOC101304245), mRNA	NA	NA	NA	NA	NA
CL8761.Contig2_All	1726	1.82389	3.92e-12	Up	gi|470144082|ref|XP_004307694.1|/0/PREDICTED: uncharacterized protein LOC101292549 [Fragaria vesca subsp. vesca]	gi|470144081|ref|XM_004307646.1|/0.0/PREDICTED: Fragaria vesca subsp. vesca uncharacterized LOC101292549, transcript variant 1 (LOC101292549), mRNA	NA	NA	NA	PTHR31439:SF0/3.4E-268/--	NA
CL6623.Contig2_All	486	1.19076	0.00125869	Up	NA	gi|449509076|ref|XM_004163438.1|/1e-07/PREDICTED: Cucumis sativus glutathionyl-hydroquinone reductase YqjG-like (LOC101225701), mRNA	NA	NA	NA	NA	NA
CL109.Contig2_All	1111	4.3759	5.92e-11	Up	gi|470115259|ref|XP_004293820.1|/1.78483e-84/PREDICTED: mitochondrial amidoxime reducing component 2-like [Fragaria vesca subsp. vesca] &gt;gi|764554683|ref|XP_011460528.1| PREDICTED: mitochondrial amidoxime reducing component 2-like [Fragaria vesca subsp. vesca]	gi|470115258|ref|XM_004293772.1|/0.0/PREDICTED: Fragaria vesca subsp. vesca MOSC domain-containing protein 2, mitochondrial-like (LOC101307096), mRNA	NA	NA	VCA0924_1/1e-08/---	PTHR14237:SF3/5.1E-27/--	molecular_function:GO:0043167//ion binding;
Unigene24713_All	1553	-2.54992	0.00106543	Down	gi|470103042|ref|XP_004287955.1|/0/PREDICTED: L-ascorbate oxidase homolog [Fragaria vesca subsp. vesca]	gi|470103041|ref|XM_004287907.1|/0.0/PREDICTED: Fragaria vesca subsp. vesca L-ascorbate oxidase homolog (LOC101294592), mRNA	sp|Q00624|ASOL_BRANA/3e-143/L-ascorbate oxidase homolog OS=Brassica napus GN=Bp10 PE=2 SV=1	pxb:103938913/3e-171/L-ascorbate oxidase homolog; K19791 iron transport multicopper oxidase	YMR058w/2e-18/---	PF07731/7.7E-7/Multicopper oxidase	biological_process:GO:0055114//oxidation-reduction process;molecular_function:GO:0005507//copper ion binding;GO:0016491//oxidoreductase activity;
CL4135.Contig4_All	1355	-1.74887	1.64e-227	Down	gi|470137757|ref|XP_004304629.1|/7.66416e-88/PREDICTED: uncharacterized protein LOC101297467 [Fragaria vesca subsp. vesca]	gi|470137756|ref|XM_004304581.1|/0.0/PREDICTED: Fragaria vesca subsp. vesca uncharacterized LOC101297467 (LOC101297467), mRNA	NA	NA	NA	NA	NA
CL9257.Contig5_All	1178	1.11061	3.47e-12	Up	gi|470120628|ref|XP_004296401.1|/1.92565e-137/PREDICTED: uncharacterized protein LOC101310979 [Fragaria vesca subsp. vesca]	gi|470120627|ref|XM_004296353.1|/0.0/PREDICTED: Fragaria vesca subsp. vesca cyclopropane-fatty-acyl-phospholipid synthase-like (LOC101310979), mRNA	sp|C3SBU4|TNMT2_PAPBR/2e-17/Probable (S)-tetrahydroprotoberberine N-methyltransferase 2 OS=Papaver bracteatum PE=2 SV=1	fve:101310979/3e-138/uncharacterized LOC101310979; K00574 cyclopropane-fatty-acyl-phospholipid synthase [EC:2.1.1.79]	VC1122/7e-47/---	PF02353/3.6E-66/Mycolic acid cyclopropane synthetase	biological_process:GO:0055114//oxidation-reduction process;molecular_function:GO:0016491//oxidoreductase activity;
CL7260.Contig1_All	1941	-1.32963	1.89e-21	Down	gi|470110484|ref|XP_004291511.1|/0/PREDICTED: probable protein phosphatase 2C 24 [Fragaria vesca subsp. vesca]	gi|470110483|ref|XM_004291463.1|/0.0/PREDICTED: Fragaria vesca subsp. vesca probable protein phosphatase 2C 24-like (LOC101303388), mRNA	sp|Q9FIF5|P2C78_ARATH/8e-123/Probable protein phosphatase 2C 78 OS=Arabidopsis thaliana GN=At5g59220 PE=2 SV=1	fve:101303388/0.0/probable protein phosphatase 2C 24; K14497 protein phosphatase 2C [EC:3.1.3.16]	SPCC4F11.02/6e-28/---	PTHR13832:SF219/1.9E-175/--	biological_process:GO:0006470//protein dephosphorylation;molecular_function:GO:0046872//metal ion binding;GO:0004722//protein serine/threonine phosphatase activity;
CL2317.Contig5_All	2689	-1.06438	2.07e-16	Down	gi|470123582|ref|XP_004297802.1|/0/PREDICTED: probable potassium transporter 17 [Fragaria vesca subsp. vesca]	gi|470123581|ref|XM_004297754.1|/0.0/PREDICTED: Fragaria vesca subsp. vesca probable potassium transporter 17-like (LOC101311472), mRNA	sp|Q67UC7|HAK17_ORYSJ/0.0/Probable potassium transporter 17 OS=Oryza sativa subsp. japonica GN=HAK17 PE=2 SV=2	fve:101311472/0.0/probable potassium transporter 17; K03549 KUP system potassium uptake protein	XF1903/1e-85/---	PTHR30540/0.0/--	biological_process:GO:0071805//potassium ion transmembrane transport;cellular_component:GO:0016021//integral component of membrane;molecular_function:GO:0015079//potassium ion transmembrane transporter activity;
Unigene5999_All	1191	1.01936	0.00162437	Up	gi|470119816|ref|XP_004296006.1|/1.29957e-165/PREDICTED: putative B3 domain-containing protein At5g58280 [Fragaria vesca subsp. vesca] &gt;gi|764561773|ref|XP_011461381.1| PREDICTED: putative B3 domain-containing protein At5g58280 [Fragaria vesca subsp. vesca]	gi|502096432|ref|XM_004490678.1|/2e-30/PREDICTED: Cicer arietinum neurofilament heavy polypeptide-like (LOC101498339), transcript variant X2, mRNA	sp|Q5KQI4|Y5814_ORYSJ/8e-56/B3 domain-containing protein Os05g0481400 OS=Oryza sativa subsp. japonica GN=Os05g0481400 PE=2 SV=1	NA	NA	PTHR31391/9.9E-84/--	NA
Unigene47_All	1109	-1.03504	8.81e-10	Down	gi|645241587|ref|XP_008227147.1|/9.72479e-128/PREDICTED: extensin-2-like [Prunus mume]	gi|502148257|ref|XM_004507039.1|/6e-58/PREDICTED: Cicer arietinum extensin-2-like (LOC101492248), mRNA	sp|Q9M1G9|EXTN2_ARATH/9e-86/Extensin-2 OS=Arabidopsis thaliana GN=EXT2 PE=2 SV=1	sind:105163612/1e-78/extensin-2-like; K05747 Wiskott-Aldrich syndrome protein	XF0818/6e-27/---	PF04554/9.0E-6/Extensin-like region	NA
Unigene9080_All	1182	2.17846	0	Up	gi|470125772|ref|XP_004298873.1|/2.14725e-120/PREDICTED: early nodulin-like protein 3 [Fragaria vesca subsp. vesca]	gi|470125771|ref|XM_004298825.1|/0.0/PREDICTED: Fragaria vesca subsp. vesca uncharacterized LOC101304966 (LOC101304966), mRNA	sp|Q9SK27|ENL1_ARATH/1e-11/Early nodulin-like protein 1 OS=Arabidopsis thaliana GN=At2g25060 PE=1 SV=2	NA	NA	PF02298/2.9E-16/Plastocyanin-like domain	NA
Unigene4957_All	1554	1.2234	0.00111337	Up	gi|470136023|ref|XP_004303801.1|/2.61291e-159/PREDICTED: uncharacterized protein LOC101309273 [Fragaria vesca subsp. vesca]	gi|470136022|ref|XM_004303753.1|/0.0/PREDICTED: Fragaria vesca subsp. vesca uncharacterized LOC101309273 (LOC101309273), mRNA	NA	NA	MA1613/7e-07/---	PS50005/8.762/TPR repeat profile.	cellular_component:GO:0016021//integral component of membrane;
CL5958.Contig2_All	1592	-1.08148	1.33e-33	Down	gi|470129706|ref|XP_004300750.1|/0/PREDICTED: transcription factor TCP9-like [Fragaria vesca subsp. vesca]	gi|470129705|ref|XM_004300702.1|/0.0/PREDICTED: Fragaria vesca subsp. vesca transcription factor TCP9-like (LOC101296009), mRNA	sp|O64647|TCP9_ARATH/5e-67/Transcription factor TCP9 OS=Arabidopsis thaliana GN=TCP9 PE=2 SV=1	brp:103855775/9e-23/transcription factor TCP21; K16221 transcription factor TCP21 (protein CCA1 HIKING EXPEDITION)	NA	PTHR31072:SF1/1.1E-55/--	NA
CL2653.Contig1_All	2239	1.317	0.00438633	Up	gi|764559242|ref|XP_011460999.1|/0/PREDICTED: protein MOS2 [Fragaria vesca subsp. vesca] &gt;gi|764559246|ref|XP_011461000.1| PREDICTED: protein MOS2 [Fragaria vesca subsp. vesca] &gt;gi|764559252|ref|XP_011461001.1| PREDICTED: protein MOS2 [Fragaria vesca subsp. vesca]	gi|470119401|ref|XM_004295755.1|/0.0/PREDICTED: Fragaria vesca subsp. vesca protein MOS2-like (LOC101292784), mRNA	sp|Q9C801|MOS2_ARATH/4e-105/Protein MOS2 OS=Arabidopsis thaliana GN=MOS2 PE=2 SV=1	fve:101292784/0.0/protein MOS2; K13101 G patch domain and KOW motifs-containing protein	NA	SM00443/3.9E-4/glycine rich nucleic binding domain	molecular_function:GO:0003676//nucleic acid binding;
Unigene3768_All	1887	3.1845	2.26e-13	Up	gi|470143351|ref|XP_004307342.1|/0/PREDICTED: uncharacterized protein LOC101306672 [Fragaria vesca subsp. vesca]	gi|470143350|ref|XM_004307294.1|/0.0/PREDICTED: Fragaria vesca subsp. vesca uncharacterized LOC101306672 (LOC101306672), mRNA	NA	aly:ARALYDRAFT_321151/2e-93/hypothetical protein; K14794 ribosomal RNA-processing protein 12	NA	PTHR21576:SF18/0.0/--	cellular_component:GO:0009506//plasmodesma;GO:0016021//integral component of membrane;
CL3545.Contig7_All	2636	1.8131	8.34e-06	Up	gi|565392356|ref|XP_006361870.1|/0/PREDICTED: aspartic proteinase-like protein 2 isoform X1 [Solanum tuberosum]	gi|470105623|ref|XM_004289134.1|/0.0/PREDICTED: Fragaria vesca subsp. vesca aspartic proteinase-like protein 2-like (LOC101304919), mRNA	sp|Q9LS40|ASPG1_ARATH/6e-20/Protein ASPARTIC PROTEASE IN GUARD CELL 1 OS=Arabidopsis thaliana GN=ASPG1 PE=1 SV=1	brp:103845515/1e-40/aspartic proteinase-like protein 2; K00924	NA	PS00141/-/Eukaryotic and viral aspartyl proteases active site.	biological_process:GO:0006508//proteolysis;cellular_component:GO:0016021//integral component of membrane;molecular_function:GO:0004190//aspartic-type endopeptidase activity;
CL4394.Contig1_All	2114	-1.39229	1.75e-15	Down	gi|470140530|ref|XP_004305993.1|/0/PREDICTED: tricyclene synthase EBOS, chloroplastic-like [Fragaria vesca subsp. vesca]	gi|470105552|ref|XR_183842.1|/0.0/PREDICTED: Fragaria vesca subsp. vesca tricyclene synthase EBOS, chloroplastic-like (LOC101292163), misc_RNA	sp|Q672F7|TPS2_LOTJA/7e-173/Tricyclene synthase EBOS, chloroplastic OS=Lotus japonicus GN=EBOS PE=1 SV=1	fve:101305692/0.0/tricyclene synthase EBOS, chloroplastic-like; K12742 isoprene synthase [EC:4.2.3.27]	NA	PF03936/2.1E-77/Terpene synthase family, metal binding domain	NA
CL749.Contig1_All	2220	1.07436	0.00547138	Up	gi|764517459|ref|XP_011466737.1|/0/PREDICTED: RNA-binding protein 39 [Fragaria vesca subsp. vesca]	gi|470106072|ref|XM_004289352.1|/0.0/PREDICTED: Fragaria vesca subsp. vesca uncharacterized LOC101312204 (LOC101312204), mRNA	sp|Q2R0Q1|U2A2A_ORYSJ/3e-12/Splicing factor U2af large subunit A OS=Oryza sativa subsp. japonica GN=U2AF65A PE=2 SV=2	fve:101312204/0.0/RNA-binding protein 39; K13091 RNA-binding protein 39	SPAC140.02/7e-09/---	PTHR24012/1.8E-85/--	biological_process:GO:0006397//mRNA processing;cellular_component:GO:0005634//nucleus;molecular_function:GO:0003723//RNA binding;GO:0000166//nucleotide binding;
CL51.Contig3_All	748	-2.72782	7.43e-05	Down	gi|470121509|ref|XP_004296808.1|/2.46401e-50/PREDICTED: monothiol glutaredoxin-S2-like [Fragaria vesca subsp. vesca]	gi|470121508|ref|XM_004296760.1|/0.0/PREDICTED: Fragaria vesca subsp. vesca monothiol glutaredoxin-S2-like (LOC101299174), mRNA	sp|Q8L8Z8|GRXS2_ARATH/5e-44/Monothiol glutaredoxin-S2 OS=Arabidopsis thaliana GN=GRXS2 PE=3 SV=1	fve:101299174/5e-51/monothiol glutaredoxin-S2-like; K03676 glutaredoxin 3	SPAC4F10.20/2e-07/---	PTHR10168/6.0E-64/--	NA
CL8926.Contig2_All	2747	3.32229	4.4e-202	Up	gi|764506998|ref|XP_004288761.2|/0/PREDICTED: uncharacterized protein LOC101307834 [Fragaria vesca subsp. vesca]	gi|470104754|ref|XM_004288713.1|/0.0/PREDICTED: Fragaria vesca subsp. vesca uncharacterized LOC101307834 (LOC101307834), mRNA	NA	NA	NA	PTHR31414/2.1E-228/--	NA
CL8245.Contig2_All	1347	-1.48341	0.000308034	Down	gi|764579680|ref|XP_011463718.1|/1.8312e-158/PREDICTED: uncharacterized protein LOC105351389 [Fragaria vesca subsp. vesca]	gi|470103541|ref|XR_183735.1|/3e-48/PREDICTED: Fragaria vesca subsp. vesca uncharacterized LOC101294209 (LOC101294209), misc_RNA	NA	NA	NA	NA	NA
Unigene23359_All	2489	4.44738	9.04e-40	Up	gi|764607116|ref|XP_004305551.2|/0/PREDICTED: uncharacterized protein LOC101314780 [Fragaria vesca subsp. vesca]	gi|470139631|ref|XM_004305503.1|/0.0/PREDICTED: Fragaria vesca subsp. vesca uncharacterized LOC101314780 (LOC101314780), mRNA	NA	bna:106454088/2e-11/feruloyl CoA ortho-hydroxylase 1-like; K06892 feruloyl-CoA ortho-hydroxylase [EC:1.14.11.-]	SPAC140.02/8e-07/---	PTHR31250/3.7E-251/--	NA
CL8629.Contig2_All	1217	-1.61268	0.00273359	Down	gi|764548671|ref|XP_011459839.1|/6.95185e-138/PREDICTED: LOW QUALITY PROTEIN: ABC transporter B family member 13-like, partial [Fragaria vesca subsp. vesca]	gi|470113452|ref|XM_004292890.1|/1e-105/PREDICTED: Fragaria vesca subsp. vesca ABC transporter B family member 13-like (LOC101306304), partial mRNA	sp|Q9C7F8|AB13B_ARATH/1e-103/ABC transporter B family member 13 OS=Arabidopsis thaliana GN=ABCB13 PE=3 SV=1	fve:101306304/1e-138/ABC transporter B family member 13-like; K05658 ATP-binding cassette, subfamily B (MDR/TAP), member 1 [EC:3.6.3.44]	SPCC663.03/3e-72/---	PTHR24221/1.1E-156/--	biological_process:GO:0055085//transmembrane transport;cellular_component:GO:0016021//integral component of membrane;molecular_function:GO:0005524//ATP binding;GO:0042626//ATPase activity, coupled to transmembrane movement of substances;
Unigene11610_All	1475	-1.68658	5.1e-43	Down	gi|470126606|ref|XP_004299274.1|/3.62675e-179/PREDICTED: dof zinc finger protein DOF5.4 [Fragaria vesca subsp. vesca]	gi|470126605|ref|XM_004299226.1|/0.0/PREDICTED: Fragaria vesca subsp. vesca dof zinc finger protein DOF5.4-like (LOC101303999), mRNA	sp|Q8LDR0|DOF54_ARATH/3e-64/Dof zinc finger protein DOF5.4 OS=Arabidopsis thaliana GN=DOF5.4 PE=2 SV=2	ath:AT5G62430/3e-21/CDF1; cycling DOF factor 1; K16222 Dof zinc finger protein DOF5.5	NA	PS01361/-/Zinc finger Dof-type signature.	NA
CL1370.Contig7_All	1665	1.17193	0.00147304	Up	gi|470109923|ref|XP_004291237.1|/0/PREDICTED: serine/threonine-protein kinase AFC3 [Fragaria vesca subsp. vesca]	gi|470109922|ref|XM_004291189.1|/0.0/PREDICTED: Fragaria vesca subsp. vesca serine/threonine-protein kinase AFC3-like (LOC101294910), mRNA	sp|P51568|AFC3_ARATH/6e-168/Serine/threonine-protein kinase AFC3 OS=Arabidopsis thaliana GN=AFC3 PE=2 SV=2	fve:101294910/0.0/serine/threonine-protein kinase AFC3; K08287 dual-specificity kinase [EC:2.7.12.1]	SPAC1687.15/7e-19/---	PTHR24058:SF44/9.1E-198/--	biological_process:GO:0046777//protein autophosphorylation;molecular_function:GO:0004674//protein serine/threonine kinase activity;GO:0005524//ATP binding;
Unigene23865_All	442	2.38941	0.00213322	Up	gi|764593156|ref|XP_011465446.1|/2.99897e-55/PREDICTED: uncharacterized protein LOC105351754 [Fragaria vesca subsp. vesca]	NA	NA	NA	NA	NA	NA
CL1702.Contig1_All	1039	1.10412	2.24e-05	Up	gi|764593147|ref|XP_011465445.1|/1.51886e-108/PREDICTED: uncharacterized protein LOC101304881 [Fragaria vesca subsp. vesca]	gi|470131986|ref|XM_004301821.1|/0.0/PREDICTED: Fragaria vesca subsp. vesca uncharacterized LOC101304881 (LOC101304881), mRNA	NA	NA	NA	NA	NA
Unigene1298_All	1389	3.27394	1.28e-66	Up	gi|470133473|ref|XP_004302590.1|/2.91764e-175/PREDICTED: cationic peroxidase 1-like [Fragaria vesca subsp. vesca]	gi|470133472|ref|XM_004302542.1|/0.0/PREDICTED: Fragaria vesca subsp. vesca cationic peroxidase 1-like (LOC101296497), mRNA	sp|P22195|PER1_ARAHY/3e-135/Cationic peroxidase 1 OS=Arachis hypogaea GN=PNC1 PE=1 SV=2	fve:101296497/5e-176/cationic peroxidase 1-like; K00430 peroxidase [EC:1.11.1.7]	NA	PR00458/1.0E-33/Haem peroxidase superfamily signature	NA
CL607.Contig2_All	1743	1.12314	6.87e-11	Up	gi|764612346|ref|XP_004303954.2|/0/PREDICTED: putative UDP-glucose flavonoid 3-O-glucosyltransferase 3 [Fragaria vesca subsp. vesca]	gi|470136344|ref|XM_004303907.1|/0.0/PREDICTED: Fragaria vesca subsp. vesca UDP-glucose flavonoid 3-O-glucosyltransferase 6-like (LOC101309653), mRNA	sp|Q2V6K0|UFOG6_FRAAN/0.0/UDP-glucose flavonoid 3-O-glucosyltransferase 6 OS=Fragaria ananassa GN=GT6 PE=1 SV=1	atr:18448124/9e-83/anthocyanidin 3-O-glucosyltransferase 2; K08237 hydroquinone glucosyltransferase [EC:2.4.1.218]	NA	PS00375/-/UDP-glycosyltransferases signature.	biological_process:GO:0008152//metabolic process;molecular_function:GO:0047893//flavonol 3-O-glucosyltransferase activity;
Unigene1922_All	570	2.77935	0.000303319	Up	NA	NA	NA	NA	NA	NA	NA
CL252.Contig33_All	2953	3.23856	1.81e-05	Up	gi|470130586|ref|XP_004301184.1|/0/PREDICTED: DNA mismatch repair protein MSH4 [Fragaria vesca subsp. vesca]	gi|470130585|ref|XM_004301136.1|/0.0/PREDICTED: Fragaria vesca subsp. vesca DNA mismatch repair protein MSH4-like (LOC101296577), mRNA	sp|F4JP48|MSH4_ARATH/0.0/DNA mismatch repair protein MSH4 OS=Arabidopsis thaliana GN=MSH4 PE=2 SV=1	fve:101296577/0.0/DNA mismatch repair protein MSH4; K08740 DNA mismatch repair protein MSH4	YFL003c/9e-71/---	PF00488/1.1E-81/MutS domain V	biological_process:GO:0007129//synapsis;GO:0010777//meiotic mismatch repair involved in reciprocal meiotic recombination;cellular_component:GO:0043073//germ cell nucleus;GO:0009506//plasmodesma;GO:0000794//condensed nuclear chromosome;molecular_function:GO:0005524//ATP binding;GO:0030983//mismatched DNA binding;
Unigene14376_All	574	2.18211	0.0034778	Up	gi|470101664|ref|XP_004287290.1|/7.7744e-62/PREDICTED: umecyanin-like [Fragaria vesca subsp. vesca]	gi|470101663|ref|XM_004287242.1|/0.0/PREDICTED: Fragaria vesca subsp. vesca umecyanin-like (LOC101312956), mRNA	sp|Q07488|BCB1_ARATH/6e-20/Blue copper protein OS=Arabidopsis thaliana GN=BCB PE=1 SV=2	NA	NA	PF02298/1.9E-18/Plastocyanin-like domain	NA
CL183.Contig2_All	4106	4.45948	3.91e-10	Up	gi|764559146|ref|XP_011460986.1|/0/PREDICTED: uncharacterized protein LOC101295784 isoform X2 [Fragaria vesca subsp. vesca]	gi|470116338|ref|XM_004294292.1|/0.0/PREDICTED: Fragaria vesca subsp. vesca uncharacterized LOC101295784 (LOC101295784), mRNA	NA	NA	NA	PTHR22774/3.8E-107/--	NA
CL5519.Contig2_All	2172	3.91591	3.66e-12	Up	gi|764569095|ref|XP_011462397.1|/0/PREDICTED: MATE efflux family protein LAL5-like isoform X1 [Fragaria vesca subsp. vesca]	gi|470123833|ref|XM_004297877.1|/0.0/PREDICTED: Fragaria vesca subsp. vesca MATE efflux family protein ALF5-like (LOC101309343), mRNA	sp|Q9LUH3|LAL5_ARATH/1e-143/MATE efflux family protein LAL5 OS=Arabidopsis thaliana GN=LAL5 PE=2 SV=1	fve:101309343/0.0/MATE efflux family protein LAL5-like; K03327 multidrug resistance protein, MATE family	SPCC4B3.13/5e-57/---	PTHR11206:SF78/8.6E-224/--	biological_process:GO:0006855//drug transmembrane transport;cellular_component:GO:0016021//integral component of membrane;molecular_function:GO:0015238//drug transmembrane transporter activity;GO:0015297//antiporter activity;
Unigene11233_All	670	-1.4032	0.000335363	Down	gi|823243777|ref|XP_012454544.1|/3.9968e-19/PREDICTED: uncharacterized protein LOC105776442 [Gossypium raimondii] &gt;gi|763802491|gb|KJB69429.1| hypothetical protein B456_011G023600 [Gossypium raimondii]	gi|359485787|ref|XM_002274823.2|/2e-13/PREDICTED: Vitis vinifera uncharacterized LOC100266494 (LOC100266494), mRNA	NA	NA	NA	NA	NA
CL4787.Contig1_All	912	2.6505	0.000618108	Up	gi|470103501|ref|XP_004288175.1|/2.01255e-122/PREDICTED: ABC transporter G family member 11-like [Fragaria vesca subsp. vesca]	gi|470103500|ref|XM_004288127.1|/0.0/PREDICTED: Fragaria vesca subsp. vesca ABC transporter G family member 11-like (LOC101313249), mRNA	sp|Q8RXN0|AB11G_ARATH/2e-68/ABC transporter G family member 11 OS=Arabidopsis thaliana GN=ABCG11 PE=1 SV=1	adu:107470452/1e-22/ABC transporter G family member 5-like; K05681 ATP-binding cassette, subfamily G (WHITE), member 2	YDR406w_2/2e-06/---	PF01061/2.3E-24/ABC-2 type transporter	biological_process:GO:0015748//organophosphate ester transport;GO:0015716//organic phosphonate transport;cellular_component:GO:0016021//integral component of membrane;molecular_function:GO:0005524//ATP binding;GO:0015416//organic phosphonate transmembrane-transporting ATPase activity;
Unigene15411_All	1665	-1.33125	0.00334749	Down	gi|764619237|ref|XP_011468326.1|/0/PREDICTED: cytochrome P450 724B1 [Fragaria vesca subsp. vesca]	gi|470141337|ref|XM_004306343.1|/0.0/PREDICTED: Fragaria vesca subsp. vesca cytochrome P450 724B1-like (LOC101308903), mRNA	sp|Q6F4F5|C724B_ORYSJ/2e-143/Cytochrome P450 724B1 OS=Oryza sativa subsp. japonica GN=CYP724B1 PE=1 SV=1	fve:101308903/0.0/cytochrome P450 724B1; K12639 cytochrome P450, family 724, subfamily B, polypeptide 1 [EC:1.14.13.-]	slr0574/5e-43/---	PR00385/1.8E-5/P450 superfamily signature	biological_process:GO:0016132//brassinosteroid biosynthetic process;GO:0055114//oxidation-reduction process;molecular_function:GO:0016705//oxidoreductase activity, acting on paired donors, with incorporation or reduction of molecular oxygen;GO:0020037//heme binding;GO:0005506//iron ion binding;GO:0010012//steroid 22-alpha hydroxylase activity;
Unigene21499_All	1587	-1.38917	0.00294304	Down	gi|764639910|ref|XP_011470682.1|/1.90056e-80/PREDICTED: protein FAR1-RELATED SEQUENCE 5-like [Fragaria vesca subsp. vesca]	gi|470147090|ref|XM_004309102.1|/0.0/PREDICTED: Fragaria vesca subsp. vesca protein FAR1-RELATED SEQUENCE 5-like (LOC101295964), mRNA	sp|Q94KE0|ERDL3_ARATH/3e-26/Sugar transporter ERD6-like 3 OS=Arabidopsis thaliana GN=SUGTL2 PE=2 SV=1	fve:101307612/8e-48/sugar transporter ERD6-like 17; K08145 MFS transporter, SP family, solute carrier family 2 (facilitated glucose transporter), member 8	NA	PS50850/12.037/Major facilitator superfamily (MFS) profile.	NA
Unigene10668_All	1887	-1.77644	1.4e-208	Down	gi|470126386|ref|XP_004299169.1|/0/PREDICTED: probable pectate lyase 18 [Fragaria vesca subsp. vesca]	gi|470126385|ref|XM_004299121.1|/0.0/PREDICTED: Fragaria vesca subsp. vesca probable pectate lyase 18-like (LOC101295811), mRNA	sp|Q9C5M8|PLY18_ARATH/0.0/Probable pectate lyase 18 OS=Arabidopsis thaliana GN=At4g24780 PE=2 SV=2	fve:101295811/0.0/probable pectate lyase 18; K01728 pectate lyase [EC:4.2.2.2]	BS_pel/4e-17/---	PTHR31683/3.3E-272/--	biological_process:GO:0045490//pectin catabolic process;molecular_function:GO:0046872//metal ion binding;GO:0030570//pectate lyase activity;
Unigene20246_All	1484	1.98466	5.51e-05	Up	gi|470148982|ref|XP_004310025.1|/0/PREDICTED: vinorine synthase-like [Fragaria vesca subsp. vesca]	gi|470148981|ref|XM_004309977.1|/0.0/PREDICTED: Fragaria vesca subsp. vesca vinorine synthase-like (LOC101291888), mRNA	sp|Q70PR7|VINSY_RAUSE/9e-71/Vinorine synthase OS=Rauvolfia serpentina GN=ACT PE=1 SV=2	rcu:8266358/7e-76/salutaridinol 7-O-acetyltransferase; K15400 omega-hydroxypalmitate O-feruloyl transferase [EC:2.3.1.188]	NA	PTHR31623/2.3E-87/--	NA
CL252.Contig8_All	3287	-2.19918	0.00467155	Down	gi|470130586|ref|XP_004301184.1|/0/PREDICTED: DNA mismatch repair protein MSH4 [Fragaria vesca subsp. vesca]	gi|470130585|ref|XM_004301136.1|/0.0/PREDICTED: Fragaria vesca subsp. vesca DNA mismatch repair protein MSH4-like (LOC101296577), mRNA	sp|F4JP48|MSH4_ARATH/0.0/DNA mismatch repair protein MSH4 OS=Arabidopsis thaliana GN=MSH4 PE=2 SV=1	fve:101296577/0.0/DNA mismatch repair protein MSH4; K08740 DNA mismatch repair protein MSH4	YFL003c/6e-58/---	PF05190/3.4E-12/MutS family domain IV	biological_process:GO:0007129//synapsis;GO:0010777//meiotic mismatch repair involved in reciprocal meiotic recombination;cellular_component:GO:0043073//germ cell nucleus;GO:0009506//plasmodesma;GO:0000794//condensed nuclear chromosome;molecular_function:GO:0005524//ATP binding;GO:0030983//mismatched DNA binding;
Unigene11602_All	1562	3.17264	6.5e-09	Up	gi|764593143|ref|XP_004300569.2|/0/PREDICTED: protein will die slowly-like [Fragaria vesca subsp. vesca]	gi|470129318|ref|XM_004300521.1|/0.0/PREDICTED: Fragaria vesca subsp. vesca uncharacterized LOC101311381 (LOC101311381), mRNA	sp|Q9FE91|C3H62_ARATH/8e-15/Zinc finger CCCH domain-containing protein 62 OS=Arabidopsis thaliana GN=ZFWD4 PE=2 SV=1	sind:105164749/1e-65/myosin heavy chain kinase B-like; K14963 COMPASS component SWD3	all0284_3/1e-15/---	PS50082/9.272/Trp-Asp (WD) repeats profile.	NA
Unigene9127_All	1471	1.15922	6.45e-26	Up	gi|470110835|ref|XP_004291668.1|/0/PREDICTED: NAC domain-containing protein 18-like [Fragaria vesca subsp. vesca]	gi|470110834|ref|XM_004291620.1|/0.0/PREDICTED: Fragaria vesca subsp. vesca NAC transcription factor ONAC010-like (LOC101306695), mRNA	sp|Q9ZNU2|NAC18_ARATH/2e-93/NAC domain-containing protein 18 OS=Arabidopsis thaliana GN=NAC018 PE=2 SV=1	bna:106399005/6e-34/uncharacterized LOC106399005; K01054 acylglycerol lipase [EC:3.1.1.23]	NA	PTHR31719/1.1E-101/--	biological_process:GO:0006351//transcription, DNA-templated;
CL4259.Contig6_All	1890	-4.70336	1.08e-11	Down	gi|470135499|ref|XP_004303552.1|/0/PREDICTED: putative F-box/FBD/LRR-repeat protein At4g03220 isoform X3 [Fragaria vesca subsp. vesca]	gi|470135498|ref|XM_004303504.1|/0.0/PREDICTED: Fragaria vesca subsp. vesca putative F-box/LRR-repeat protein At5g41840-like, transcript variant 2 (LOC101302572), mRNA	sp|Q9ZV93|FDL10_ARATH/3e-12/F-box/FBD/LRR-repeat protein At1g78750 OS=Arabidopsis thaliana GN=At1g78750 PE=2 SV=1	NA	NA	PS50181/12.253/F-box domain profile.	NA
Unigene55_All	1283	-1.14472	3.05e-13	Down	gi|645241587|ref|XP_008227147.1|/2.74645e-132/PREDICTED: extensin-2-like [Prunus mume]	gi|502148257|ref|XM_004507039.1|/4e-38/PREDICTED: Cicer arietinum extensin-2-like (LOC101492248), mRNA	sp|Q9M1G9|EXTN2_ARATH/2e-94/Extensin-2 OS=Arabidopsis thaliana GN=EXT2 PE=2 SV=1	aip:107619883/2e-76/formin-like protein 20; K02184 formin 2	XF0818/4e-30/---	PR01217/9.5E-11/Proline rich extensin signature	NA
CL4412.Contig5_All	2312	-1.4742	0.000103253	Down	gi|470104812|ref|XP_004288787.1|/0/PREDICTED: putative clathrin assembly protein At2g25430 [Fragaria vesca subsp. vesca]	gi|292774593|dbj|AK337785.1|/5e-45/Lotus japonicus cDNA, clone: LjFL1-sab-002-AA04, HTC	sp|Q8S9J8|CAP1_ARATH/0.0/Probable clathrin assembly protein At4g32285 OS=Arabidopsis thaliana GN=At4g32285 PE=1 SV=2	tcc:TCM_038121/0.0/Epsin N-terminal domain-containing protein / clathrin assembly protein-related; K20043 clathrin coat assembly protein AP180	NA	PTHR22951:SF13/1.8E-226/--	biological_process:GO:0048268//clathrin coat assembly;cellular_component:GO:0030136//clathrin-coated vesicle;molecular_function:GO:0030276//clathrin binding;GO:0005545//1-phosphatidylinositol binding;
Unigene3520_All	1615	1.92175	6.89e-14	Up	gi|764624854|ref|XP_011468987.1|/0/PREDICTED: putative UDP-rhamnose:rhamnosyltransferase 1 [Fragaria vesca subsp. vesca]	gi|470145403|ref|XM_004308281.1|/2e-89/PREDICTED: Fragaria vesca subsp. vesca soyasaponin III rhamnosyltransferase-like (LOC101302017), mRNA	sp|Q940V3|U91A1_ARATH/8e-95/UDP-glycosyltransferase 91A1 OS=Arabidopsis thaliana GN=UGT91A1 PE=2 SV=1	adu:107468558/2e-94/soyasaponin III rhamnosyltransferase-like; K18823 soyasaponin III rhamnosyltransferase [EC:2.4.1.273]	NA	PF00201/3.6E-18/UDP-glucoronosyl and UDP-glucosyl transferase	biological_process:GO:0008152//metabolic process;molecular_function:GO:0016758//transferase activity, transferring hexosyl groups;
CL2076.Contig3_All	572	-2.01858	0.00291056	Down	gi|470108099|ref|XP_004290372.1|/3.18274e-47/PREDICTED: 39S ribosomal protein L41, mitochondrial-like [Fragaria vesca subsp. vesca]	gi|470108098|ref|XM_004290324.1|/1e-157/PREDICTED: Fragaria vesca subsp. vesca 39S ribosomal protein L41, mitochondrial-like (LOC101294417), mRNA	NA	fve:101294417/6e-48/39S ribosomal protein L41, mitochondrial-like; K17422 large subunit ribosomal protein L41	NA	PF09809/4.4E-18/Mitochondrial ribosomal protein L27	NA
CL7871.Contig1_All	2724	1.08117	4.45e-10	Up	gi|470113105|ref|XP_004292767.1|/0/PREDICTED: kinesin-related protein 11 isoform X1 [Fragaria vesca subsp. vesca]	gi|470113104|ref|XM_004292719.1|/0.0/PREDICTED: Fragaria vesca subsp. vesca uncharacterized LOC101299267 (LOC101299267), mRNA	sp|Q8S949|NACK2_TOBAC/5e-84/Kinesin-like protein NACK2 OS=Nicotiana tabacum GN=NACK2 PE=1 SV=1	fve:101299267/0.0/kinesin-related protein 11; K11498 centromeric protein E	YBL063w/9e-67/---	PTHR24115:SF384/1.8E-189/--	biological_process:GO:0007018//microtubule-based movement;cellular_component:GO:0005874//microtubule;molecular_function:GO:0005524//ATP binding;GO:0003777//microtubule motor activity;GO:0008017//microtubule binding;
CL473.Contig8_All	2796	2.16955	0.00233823	Up	gi|470121158|ref|XP_004296648.1|/0/PREDICTED: uncharacterized protein LOC101295216 [Fragaria vesca subsp. vesca] &gt;gi|764570221|ref|XP_011462526.1| PREDICTED: uncharacterized protein LOC101295216 [Fragaria vesca subsp. vesca]	gi|470121157|ref|XM_004296600.1|/0.0/PREDICTED: Fragaria vesca subsp. vesca uncharacterized LOC101295216, transcript variant 1 (LOC101295216), mRNA	sp|O81983|SYS_HELAN/5e-34/Serine--tRNA ligase OS=Helianthus annuus PE=2 SV=1	fve:101295216/0.0/uncharacterized LOC101295216; K15032 mTERF domain-containing protein, mitochondrial	BB0226/4e-58/---	PF02536/2.1E-21/mTERF	NA
CL2101.Contig1_All	2069	-4.13548	2.6e-08	Down	gi|764533674|ref|XP_011458547.1|/0/PREDICTED: scarecrow-like protein 1 [Fragaria vesca subsp. vesca]	gi|470108546|ref|XM_004290529.1|/0.0/PREDICTED: Fragaria vesca subsp. vesca scarecrow-like protein 1-like (LOC101314333), mRNA	sp|Q9SDQ3|SCL1_ARATH/0.0/Scarecrow-like protein 1 OS=Arabidopsis thaliana GN=SCL1 PE=2 SV=1	cam:101514454/4e-79/scarecrow-like protein 8; K14777 ATP-dependent RNA helicase DDX47/RRP3 [EC:3.6.4.13]	NA	PTHR31636:SF10/1.1E-300/--	biological_process:GO:0006355//regulation of transcription, DNA-templated;
Unigene12056_All	513	5.27001	1.04e-17	Up	NA	NA	NA	NA	NA	NA	NA
CL744.Contig2_All	1865	-2.39475	0.00107484	Down	gi|470136031|ref|XP_004303805.1|/3.07408e-173/PREDICTED: pumilio homolog 5 [Fragaria vesca subsp. vesca]	gi|470136030|ref|XM_004303757.1|/0.0/PREDICTED: Fragaria vesca subsp. vesca pumilio homolog 5-like (LOC101310431), mRNA	sp|Q9LJX4|PUM5_ARATH/3e-25/Pumilio homolog 5 OS=Arabidopsis thaliana GN=APUM5 PE=1 SV=2	fve:101310431/5e-174/pumilio homolog 5; K17943 pumilio RNA-binding family	NA	NA	NA
Unigene22357_All	4061	-1.12259	1.54e-54	Down	gi|970052375|ref|XP_015087795.1|/0/PREDICTED: extensin-2-like isoform X1 [Solanum pennellii]	gi|470124074|ref|XM_004297994.1|/0.0/PREDICTED: Fragaria vesca subsp. vesca uncharacterized LOC101307690 (LOC101307690), mRNA	sp|Q9M1G9|EXTN2_ARATH/0.0/Extensin-2 OS=Arabidopsis thaliana GN=EXT2 PE=2 SV=1	brp:103850667/2e-115/formin-like protein 20; K02184 formin 2	SPBC28F2.12/1e-24/---	PF04554/7.9E-6/Extensin-like region	NA
Unigene9069_All	1265	5.17412	1.29e-58	Up	gi|470131685|ref|XP_004301722.1|/1.31965e-171/PREDICTED: inositol oxygenase 2-like [Fragaria vesca subsp. vesca]	gi|470131684|ref|XM_004301674.1|/0.0/PREDICTED: Fragaria vesca subsp. vesca inositol oxygenase 4-like (LOC101295239), mRNA	sp|Q8H1S0|MIOX4_ARATH/9e-138/Inositol oxygenase 4 OS=Arabidopsis thaliana GN=MIOX4 PE=2 SV=1	fve:101295239/2e-172/inositol oxygenase 2-like; K00469 inositol oxygenase [EC:1.13.99.1]	NA	PTHR12588/4.6E-170/--	biological_process:GO:0019310//inositol catabolic process;GO:0055114//oxidation-reduction process;cellular_component:GO:0005737//cytoplasm;molecular_function:GO:0005506//iron ion binding;GO:0050113//inositol oxygenase activity;
CL4292.Contig6_All	2199	3.84929	0	Up	gi|470121631|ref|XP_004296866.1|/0/PREDICTED: probable pectinesterase/pectinesterase inhibitor 21 [Fragaria vesca subsp. vesca]	gi|470121630|ref|XM_004296818.1|/0.0/PREDICTED: Fragaria vesca subsp. vesca probable pectinesterase/pectinesterase inhibitor 21-like (LOC101292205), mRNA	sp|Q8GX86|PME21_ARATH/4e-147/Probable pectinesterase/pectinesterase inhibitor 21 OS=Arabidopsis thaliana GN=PME21 PE=2 SV=2	fve:101292205/0.0/probable pectinesterase/pectinesterase inhibitor 21; K01051 pectinesterase [EC:3.1.1.11]	CAC3373/1e-31/---	PTHR31707/6.2E-238/--	molecular_function:GO:0016788//hydrolase activity, acting on ester bonds;
Unigene23331_All	2022	-1.03911	4.4e-26	Down	gi|470136908|ref|XP_004304223.1|/0/PREDICTED: transcription factor TCP13 [Fragaria vesca subsp. vesca]	gi|470136907|ref|XM_004304175.1|/0.0/PREDICTED: Fragaria vesca subsp. vesca transcription factor TCP13-like (LOC101292524), mRNA	sp|Q9S7W5|TCP13_ARATH/5e-44/Transcription factor TCP13 OS=Arabidopsis thaliana GN=TCP13 PE=1 SV=1	NA	NA	PTHR31072:SF5/1.5E-65/--	NA
CL1360.Contig1_All	1022	-1.09384	4.03e-14	Down	gi|764599955|ref|XP_011466438.1|/1.14205e-71/PREDICTED: transcription factor SCREAM2-like isoform X1 [Fragaria vesca subsp. vesca]	gi|470138714|ref|XM_004305052.1|/0.0/PREDICTED: Fragaria vesca subsp. vesca transcription factor bHLH61-like (LOC101304603), mRNA	sp|Q9LXA9|BH061_ARATH/4e-08/Transcription factor bHLH61 OS=Arabidopsis thaliana GN=BHLH61 PE=2 SV=1	NA	NA	PTHR31945/3.3E-24/--	NA
CL2156.Contig6_All	5009	-1.2482	0.00240981	Down	gi|470120036|ref|XP_004296114.1|/0/PREDICTED: uncharacterized protein LOC101314170 [Fragaria vesca subsp. vesca] &gt;gi|764563032|ref|XP_011461542.1| PREDICTED: uncharacterized protein LOC101314170 [Fragaria vesca subsp. vesca] &gt;gi|764563035|ref|XP_011461543.1| PREDICTED: uncharacterized protein LOC101314170 [Fragaria vesca subsp. vesca] &gt;gi|764563039|ref|XP_011461544.1| PREDICTED: uncharac…	gi|470120035|ref|XM_004296066.1|/0.0/PREDICTED: Fragaria vesca subsp. vesca uncharacterized LOC101314170 (LOC101314170), mRNA	NA	NA	NA	NA	NA
CL4639.Contig1_All	1224	3.11753	2.79e-06	Up	gi|596258217|ref|XP_007224848.1|/5.35978e-37/hypothetical protein PRUPE_ppa023093mg, partial [Prunus persica] &gt;gi|462421784|gb|EMJ26047.1| hypothetical protein PRUPE_ppa023093mg, partial [Prunus persica]	NA	NA	NA	NA	NA	NA
Unigene11767_All	658	-2.40509	0.000724104	Down	NA	gi|470109896|ref|XM_004291176.1|/3e-31/PREDICTED: Fragaria vesca subsp. vesca ABC transporter E family member 2-like (LOC101291113), mRNA	NA	NA	NA	NA	NA
CL8767.Contig3_All	2209	-1.20533	6.04e-24	Down	gi|470110110|ref|XP_004291330.1|/0/PREDICTED: calcium-dependent protein kinase 29 isoform X1 [Fragaria vesca subsp. vesca]	gi|470110109|ref|XM_004291282.1|/0.0/PREDICTED: Fragaria vesca subsp. vesca calcium-dependent protein kinase 29-like (LOC101297901), mRNA	sp|Q8RWL2|CDPKT_ARATH/0.0/Calcium-dependent protein kinase 29 OS=Arabidopsis thaliana GN=CPK29 PE=2 SV=2	fve:101297901/0.0/calcium-dependent protein kinase 29; K13412 calcium-dependent protein kinase [EC:2.7.11.1]	SPAC14C4.03/4e-35/---	SM00054/1.4E-4/EF-hand, calcium binding motif	biological_process:GO:0006468//protein phosphorylation;cellular_component:GO:0005634//nucleus;GO:0005886//plasma membrane;GO:0005737//cytoplasm;molecular_function:GO:0004674//protein serine/threonine kinase activity;GO:0005524//ATP binding;GO:0005509//calcium ion binding;
Unigene13329_All	929	-1.55485	0.00181924	Down	gi|764521558|ref|XP_011470332.1|/8.11456e-151/PREDICTED: uncharacterized protein LOC105353184 [Fragaria vesca subsp. vesca]	gi|470101524|ref|XM_004287173.1|/1e-15/PREDICTED: Fragaria vesca subsp. vesca leucine-rich repeat receptor-like protein kinase TDR-like (LOC101292242), mRNA	sp|Q9FPQ6|GP1_CHLRE/1e-18/Vegetative cell wall protein gp1 OS=Chlamydomonas reinhardtii GN=GP1 PE=1 SV=1	mus:103999700/4e-14/proline-rich receptor-like protein kinase PERK1; K04730 interleukin-1 receptor-associated kinase 1 [EC:2.7.11.1]	all0287/6e-27/---	PF02602/2.4E-24/Uroporphyrinogen-III synthase HemD	biological_process:GO:0033014//tetrapyrrole biosynthetic process;molecular_function:GO:0004852//uroporphyrinogen-III synthase activity;
CL7916.Contig3_All	1332	1.26874	5.09e-13	Up	gi|470123668|ref|XP_004297844.1|/1.68657e-156/PREDICTED: uncharacterized protein LOC101301288 [Fragaria vesca subsp. vesca]	gi|470123667|ref|XM_004297796.1|/0.0/PREDICTED: Fragaria vesca subsp. vesca uncharacterized LOC101301288 (LOC101301288), mRNA	NA	NA	NA	NA	NA
Unigene18463_All	705	-1.01579	7.33e-49	Down	gi|764528674|ref|XP_004290137.2|/3.99995e-36/PREDICTED: putative lipid-transfer protein DIR1 [Fragaria vesca subsp. vesca]	gi|402745564|ref|NM_001249997.2|/9e-10/Glycine max uncharacterized LOC100527244 (LOC100527244), mRNA	sp|Q8W453|DIRL1_ARATH/4e-22/Putative lipid-transfer protein DIR1 OS=Arabidopsis thaliana GN=DIR1 PE=1 SV=1	NA	NA	SM00499/6.8E-4/Plant lipid transfer protein / seed storage protein / trypsin-alpha amylase inhibitor domain family	NA
CL1255.Contig5_All	1355	-2.35441	0.00251521	Down	gi|470137836|ref|XP_004304667.1|/1.23963e-32/PREDICTED: uncharacterized protein LOC101309177 [Fragaria vesca subsp. vesca]	gi|470137835|ref|XM_004304619.1|/9e-33/PREDICTED: Fragaria vesca subsp. vesca uncharacterized LOC101309177 (LOC101309177), mRNA	NA	NA	NA	NA	NA
Unigene14277_All	804	-2.41013	0.00100363	Down	gi|147860024|emb|CAN83125.1|/4.71435e-98/hypothetical protein VITISV_015109 [Vitis vinifera]	gi|470113933|ref|XM_004293126.1|/0.0/PREDICTED: Fragaria vesca subsp. vesca uncharacterized LOC101295783 (LOC101295783), mRNA	sp|P10978|POLX_TOBAC/1e-38/Retrovirus-related Pol polyprotein from transposon TNT 1-94 OS=Nicotiana tabacum PE=2 SV=1	cit:102619922/3e-70/uncharacterized mitochondrial protein AtMg00810-like; K07305 peptide-methionine (R)-S-oxide reductase [EC:1.8.4.12]	NA	PTHR11439:SF127/5.3E-103/--	NA
CL7799.Contig2_All	772	-3.28248	1.65e-05	Down	gi|470141711|ref|XP_004306573.1|/3.52759e-71/PREDICTED: uncharacterized protein At4g26485-like [Fragaria vesca subsp. vesca]	gi|470141710|ref|XM_004306525.1|/0.0/PREDICTED: Fragaria vesca subsp. vesca uncharacterized LOC101307428 (LOC101307428), mRNA	sp|P0C8L4|Y4648_ARATH/2e-23/Uncharacterized protein At4g26485 OS=Arabidopsis thaliana GN=At4g26485 PE=4 SV=1	fve:101307428/7e-72/uncharacterized protein At4g26485-like; K19307 25S rRNA (uracil2634-N3)-methyltransferase [EC:2.1.1.313]	NA	PTHR11538/4.1E-13/--	NA
CL5299.Contig1_All	429	-1.75233	4.55e-11	Down	NA	NA	NA	NA	NA	NA	NA
CL2964.Contig3_All	1000	-2.1313	0.00534255	Down	gi|764522159|ref|XP_011470942.1|/1.80739e-82/PREDICTED: uncharacterized protein LOC101294893 [Fragaria vesca subsp. vesca]	gi|470105407|ref|XM_004289028.1|/0.0/PREDICTED: Fragaria vesca subsp. vesca GDSL esterase/lipase At3g14820-like (LOC101294606), mRNA	sp|Q9LH73|GDL52_ARATH/2e-52/GDSL esterase/lipase At3g14820 OS=Arabidopsis thaliana GN=At3g14820 PE=3 SV=2	atr:18422248/9e-21/geranylgeranyl diphosphate reductase, chloroplastic; K10960 geranylgeranyl reductase [EC:1.3.1.83]	all3634/3e-11/---	PTHR22835/1.3E-68/--	NA
Unigene21280_All	1338	2.97792	1.65e-07	Up	gi|764621158|ref|XP_011468610.1|/0/PREDICTED: uncharacterized protein LOC101315174 [Fragaria vesca subsp. vesca]	gi|470140357|ref|XM_004305860.1|/0.0/PREDICTED: Fragaria vesca subsp. vesca uncharacterized LOC101315174 (LOC101315174), mRNA	NA	zma:103636678/2e-15/uncharacterized LOC103636678; K07393 putative glutathione S-transferase	all0173/4e-45/---	PTHR10120:SF21/3.4E-51/--	molecular_function:GO:0016787//hydrolase activity;
CL105.Contig7_All	1032	2.00332	0.00305654	Up	gi|764608313|ref|XP_011467282.1|/1.43746e-107/PREDICTED: ABC transporter B family member 29, chloroplastic isoform X1 [Fragaria vesca subsp. vesca]	gi|470135492|ref|XM_004303501.1|/1e-143/PREDICTED: Fragaria vesca subsp. vesca ABC transporter B family member 29, chloroplastic-like (LOC101301989), partial mRNA	sp|Q9LZB8|AB29B_ARATH/3e-37/ABC transporter B family member 29, chloroplastic OS=Arabidopsis thaliana GN=ABCB29 PE=2 SV=1	cit:102612150/6e-11/ABC transporter B family member 13-like; K05658 ATP-binding cassette, subfamily B (MDR/TAP), member 1 [EC:3.6.3.44]	all0640/7e-16/---	NA	NA
CL3458.Contig4_All	839	-1.02881	0.00112869	Down	gi|764617538|ref|XP_011468150.1|/3.1469e-55/PREDICTED: splicing factor 3A subunit 2 isoform X2 [Fragaria vesca subsp. vesca]	gi|470137464|ref|XM_004304436.1|/0.0/PREDICTED: Fragaria vesca subsp. vesca splicing factor 3A subunit 2-like (LOC101304789), mRNA	sp|Q9FLQ7|FH20_ARATH/8e-17/Formin-like protein 20 OS=Arabidopsis thaliana GN=FH20 PE=2 SV=3	fve:101304789/6e-56/splicing factor 3A subunit 2; K12826 splicing factor 3A subunit 2	Rv3876/3e-09/---	NA	cellular_component:GO:0005634//nucleus;molecular_function:GO:0008270//zinc ion binding;GO:0003676//nucleic acid binding;
CL1323.Contig12_All	809	1.96087	0.00164623	Up	gi|764602073|ref|XP_011466649.1|/3.29128e-06/PREDICTED: uncharacterized protein LOC101301697 isoform X2 [Fragaria vesca subsp. vesca]	gi|470134007|ref|XM_004302802.1|/4e-37/PREDICTED: Fragaria vesca subsp. vesca uncharacterized LOC101301697, transcript variant 1 (LOC101301697), mRNA	NA	NA	NA	NA	NA
CL281.Contig6_All	1004	-2.89456	1.88e-05	Down	NA	NA	NA	NA	NA	NA	NA
Unigene232_All	2594	1.18413	0.00225536	Up	gi|470148118|ref|XP_004309619.1|/0/PREDICTED: probable LRR receptor-like serine/threonine-protein kinase RFK1 [Fragaria vesca subsp. vesca]	gi|470148117|ref|XM_004309571.1|/0.0/PREDICTED: Fragaria vesca subsp. vesca probable LRR receptor-like serine/threonine-protein kinase RFK1-like (LOC101306584), mRNA	sp|Q9FXF2|RKF1_ARATH/0.0/Probable LRR receptor-like serine/threonine-protein kinase RFK1 OS=Arabidopsis thaliana GN=RKF1 PE=1 SV=1	bna:106382463/7e-58/probable LRR receptor-like serine/threonine-protein kinase At1g29720; K04733 interleukin-1 receptor-associated kinase 4 [EC:2.7.11.1]	MA2301_1/3e-14/---	PTHR24420/6.3E-81/--	biological_process:GO:0006468//protein phosphorylation;cellular_component:GO:0016021//integral component of membrane;molecular_function:GO:0004674//protein serine/threonine kinase activity;GO:0005524//ATP binding;
Unigene1937_All	490	-2.22602	0.00427972	Down	gi|595821297|ref|XP_007204793.1|/1.04923e-51/hypothetical protein PRUPE_ppa017738mg, partial [Prunus persica] &gt;gi|462400324|gb|EMJ05992.1| hypothetical protein PRUPE_ppa017738mg, partial [Prunus persica]	gi|470141845|ref|XM_004306589.1|/6e-10/PREDICTED: Fragaria vesca subsp. vesca heat shock cognate 70 kDa protein-like (LOC101303062), mRNA	sp|Q9LHA8|MD37C_ARATH/1e-44/Probable mediator of RNA polymerase II transcription subunit 37c OS=Arabidopsis thaliana GN=MED37C PE=1 SV=1	fve:101303062/5e-52/heat shock cognate 70 kDa protein-like; K03283 heat shock 70kDa protein 1/8	YER103w/4e-35/---	PR00301/5.4E-21/70kDa heat shock protein signature	molecular_function:GO:0005524//ATP binding;
CL901.Contig3_All	1347	2.80688	6.26e-05	Up	gi|764567958|ref|XP_011462282.1|/5.77725e-120/PREDICTED: CRIB domain-containing protein RIC6-like [Fragaria vesca subsp. vesca]	gi|224107456|ref|XM_002314450.1|/5e-19/Populus trichocarpa ROP-INTERACTIVE CRIB MOTIF-CONTAINING protein 5 (POPTR_0010s08020g) mRNA, complete cds	sp|Q1PF35|RIC6_ARATH/4e-31/CRIB domain-containing protein RIC6 OS=Arabidopsis thaliana GN=RIC6 PE=1 SV=1	pper:PRUPE_ppa016783mg/5e-14/hypothetical protein; K08770 ubiquitin C	NA	PTHR23177:SF8/6.5E-39/--	NA
CL9329.Contig2_All	556	1.16858	0.00035379	Up	gi|764588645|ref|XP_004300005.2|/4.51727e-64/PREDICTED: glucuronoxylan 4-O-methyltransferase 1 [Fragaria vesca subsp. vesca]	gi|470128130|ref|XM_004299957.1|/0.0/PREDICTED: Fragaria vesca subsp. vesca glucuronoxylan 4-O-methyltransferase 1-like (LOC101307210), mRNA	sp|Q6NMK1|GXM1_ARATH/5e-47/Glucuronoxylan 4-O-methyltransferase 1 OS=Arabidopsis thaliana GN=GXM1 PE=1 SV=1	fve:101307210/9e-65/glucuronoxylan 4-O-methyltransferase 1; K18801 glucuronoxylan 4-O-methyltransferase [EC:2.1.1.112]	NA	PTHR31444:SF2/6.5E-69/--	biological_process:GO:0045492//xylan biosynthetic process;GO:0032259//methylation;cellular_component:GO:0005794//Golgi apparatus;GO:0016021//integral component of membrane;molecular_function:GO:0030775//glucuronoxylan 4-O-methyltransferase activity;
Unigene18245_All	540	-1.2959	4.84e-09	Down	gi|470135079|ref|XP_004303358.1|/1.22231e-31/PREDICTED: glycine, alanine and asparagine-rich protein-like [Fragaria vesca subsp. vesca]	gi|470135076|ref|XM_004303309.1|/1e-106/PREDICTED: Fragaria vesca subsp. vesca uncharacterized LOC101312945 (LOC101312945), mRNA	sp|P21997|SSGP_VOLCA/1e-20/Sulfated surface glycoprotein 185 OS=Volvox carteri PE=1 SV=1	cre:CHLREDRAFT_195849/3e-20/SRP35; SR protein factor; K12890 splicing factor, arginine/serine-rich 1/9	XF0818/5e-17/---	NA	NA
Unigene424_All	1199	1.81247	0.000141664	Up	NA	gi|470143100|ref|XM_004307175.1|/2e-12/PREDICTED: Fragaria vesca subsp. vesca cycloartenol-C-24-methyltransferase-like (LOC101293342), mRNA	NA	NA	NA	NA	NA
Unigene1314_All	1260	-1.27161	3.79e-25	Down	gi|470137553|ref|XP_004304528.1|/9.15955e-141/PREDICTED: short-chain dehydrogenase reductase 2a [Fragaria vesca subsp. vesca] &gt;gi|764617932|ref|XP_011468193.1| PREDICTED: short-chain dehydrogenase reductase 2a [Fragaria vesca subsp. vesca]	gi|470137552|ref|XM_004304480.1|/0.0/PREDICTED: Fragaria vesca subsp. vesca uncharacterized LOC101292526 (LOC101292526), mRNA	sp|Q9SCU0|SDR2A_ARATH/2e-14/Short-chain dehydrogenase reductase 2a OS=Arabidopsis thaliana GN=SDR2a PE=3 SV=1	mus:103979970/4e-22/hydroxysteroid dehydrogenase-like protein 2 isoform X1; K02934 large subunit ribosomal protein L6e	BS_fabG/1e-18/---	PF13561/2.3E-29/Enoyl-(Acyl carrier protein) reductase	NA
Unigene10402_All	2190	-1.30657	0.000821768	Down	gi|470138868|ref|XP_004305175.1|/0/PREDICTED: putative receptor protein kinase ZmPK1 [Fragaria vesca subsp. vesca]	gi|157417793|gb|EF652878.1|/1e-102/Prunus serrulata isolate FIRIgl.106 kinase-like protein gene, partial cds	sp|Q9XID3|Y1343_ARATH/5e-102/G-type lectin S-receptor-like serine/threonine-protein kinase At1g34300 OS=Arabidopsis thaliana GN=At1g34300 PE=2 SV=1	sly:101254423/2e-68/uncharacterized LOC101254423; K00276 primary-amine oxidase [EC:1.4.3.21]	YAR019c/4e-20/---	PF00954/2.8E-11/S-locus glycoprotein family	biological_process:GO:0006468//protein phosphorylation;GO:0048544//recognition of pollen;cellular_component:GO:0016021//integral component of membrane;molecular_function:GO:0004674//protein serine/threonine kinase activity;GO:0005524//ATP binding;
Unigene17751_All	2809	1.10928	3.32e-09	Up	gi|470111783|ref|XP_004292124.1|/0/PREDICTED: uncharacterized protein LOC101311827 [Fragaria vesca subsp. vesca]	gi|470111782|ref|XM_004292076.1|/0.0/PREDICTED: Fragaria vesca subsp. vesca uncharacterized LOC101311827 (LOC101311827), mRNA	sp|Q9LW85|MFP1_ARATH/1e-09/MAR-binding filament-like protein 1 OS=Arabidopsis thaliana GN=MFP1 PE=2 SV=2	rcu:8264910/1e-07/myosin-3; K20283 golgin subfamily A member 4	AF1032/1e-06/---	NA	NA
Unigene8631_All	468	-1.3688	0.0023029	Down	NA	NA	NA	NA	NA	NA	NA
Unigene7327_All	391	-2.16689	0.0054263	Down	NA	gi|160954469|emb|CU230237.1|/1e-10/Populus EST from mild drought-stressed leaves	NA	NA	NA	NA	NA
Unigene837_All	1093	4.01596	0	Up	gi|302321437|gb|ADL16641.1|/1.31942e-137/thaumatin-like protein [Fragaria chiloensis]	gi|470141101|ref|XM_004306226.1|/0.0/PREDICTED: Fragaria vesca subsp. vesca thaumatin-like protein 1a-like (LOC101296223), mRNA	sp|Q9FSG7|TP1A_MALDO/4e-115/Thaumatin-like protein 1a OS=Malus domestica GN=TL1 PE=1 SV=1	gmx:100794341/8e-44/BRCA1-A complex subunit BRE-like; K12173 BRCA1-A complex subunit BRE	NA	PF00314/1.7E-82/Thaumatin family	NA
CL1195.Contig1_All	868	-2.90159	0.000155878	Down	gi|764509906|ref|XP_011460247.1|/7.2531e-127/PREDICTED: zinc finger CCCH domain-containing protein 65 [Fragaria vesca subsp. vesca]	gi|470105163|ref|XM_004288909.1|/0.0/PREDICTED: Fragaria vesca subsp. vesca uncharacterized LOC101303749 (LOC101303749), mRNA	NA	NA	NA	NA	NA
Unigene21380_All	728	2.59606	1.16e-05	Up	gi|694311997|ref|XP_009360469.1|/7.61108e-25/PREDICTED: uncharacterized protein LOC103950928 [Pyrus x bretschneideri] &gt;gi|694311999|ref|XP_009360477.1| PREDICTED: uncharacterized protein LOC103950928 [Pyrus x bretschneideri]	NA	NA	NA	NA	NA	NA
CL2510.Contig3_All	1819	1.20721	1.42e-08	Up	gi|470103848|ref|XP_004288339.1|/0/PREDICTED: protein S-acyltransferase 18 [Fragaria vesca subsp. vesca]	gi|470103847|ref|XM_004288291.1|/0.0/PREDICTED: Fragaria vesca subsp. vesca probable S-acyltransferase At4g01730-like (LOC101314990), mRNA	sp|Q9M115|ZDH16_ARATH/0.0/Protein S-acyltransferase 18 OS=Arabidopsis thaliana GN=PAT18 PE=2 SV=2	fve:101314990/0.0/protein S-acyltransferase 18; K20027 palmitoyltransferase ZDHHC1/11 [EC:2.3.1.225]	SPBC13G1.07/4e-13/---	PF01529/3.6E-30/DHHC palmitoyltransferase	cellular_component:GO:0016021//integral component of membrane;molecular_function:GO:0008270//zinc ion binding;GO:0019706//protein-cysteine S-palmitoyltransferase activity;
CL9338.Contig1_All	758	1.62512	2.29e-06	Up	gi|470115502|ref|XP_004293938.1|/4.96344e-22/PREDICTED: putative lipase YDR444W [Fragaria vesca subsp. vesca]	gi|470115501|ref|XM_004293890.1|/1e-36/PREDICTED: Fragaria vesca subsp. vesca uncharacterized LOC101293468 (LOC101293468), mRNA	sp|Q6TPK4|CYT1_ACTDE/3e-12/Cysteine proteinase inhibitor 1 OS=Actinidia deliciosa PE=1 SV=1	pmum:103326979/2e-18/cysteine proteinase inhibitor 1; K13899 cystatin-C	NA	PTHR11413/2.1E-15/--	biological_process:GO:0010466//negative regulation of peptidase activity;molecular_function:GO:0030414//peptidase inhibitor activity;
CL1255.Contig8_All	2521	1.87519	2.34e-07	Up	gi|470137836|ref|XP_004304667.1|/5.46155e-33/PREDICTED: uncharacterized protein LOC101309177 [Fragaria vesca subsp. vesca]	gi|470137841|ref|XM_004304622.1|/1e-138/PREDICTED: Fragaria vesca subsp. vesca uncharacterized LOC101310045 (LOC101310045), mRNA	NA	NA	NA	NA	NA
Unigene22550_All	2273	1.3748	0.000348537	Up	gi|470110749|ref|XP_004291633.1|/0/PREDICTED: uncharacterized protein LOC101293845 [Fragaria vesca subsp. vesca]	gi|470110748|ref|XM_004291585.1|/0.0/PREDICTED: Fragaria vesca subsp. vesca uncharacterized LOC101293845 (LOC101293845), mRNA	NA	adu:107471687/1e-07/cytochrome P450 704B1; K20495	NA	PTHR23054:SF16/2.5E-165/--	NA
Unigene20662_All	521	1.10445	0.00410838	Up	NA	NA	NA	NA	NA	NA	NA
CL1847.Contig6_All	2201	2.51872	0.000426243	Up	gi|470108813|ref|XP_004290703.1|/0/PREDICTED: LEC14B protein isoform X1 [Fragaria vesca subsp. vesca]	gi|470108812|ref|XM_004290655.1|/0.0/PREDICTED: Fragaria vesca subsp. vesca LEC14B protein-like (LOC101304242), mRNA	sp|Q40153|LE14B_LITER/9e-166/LEC14B protein OS=Lithospermum erythrorhizon PE=2 SV=1	fve:101304242/0.0/LEC14B protein; K11801 WD repeat-containing protein 23	all0438_2/2e-14/---	PS50082/10.943/Trp-Asp (WD) repeats profile.	NA
Unigene17512_All	1391	1.74111	4.06e-05	Up	gi|764564038|ref|XP_011461680.1|/2.43329e-121/PREDICTED: phosphatidylinositol N-acetylglucosaminyltransferase gpi3 subunit-like [Fragaria vesca subsp. vesca] &gt;gi|764564042|ref|XP_011461681.1| PREDICTED: phosphatidylinositol N-acetylglucosaminyltransferase gpi3 subunit-like [Fragaria vesca subsp. vesca]	gi|470117732|ref|XM_004294956.1|/0.0/PREDICTED: Fragaria vesca subsp. vesca phosphatidylinositol N-acetylglucosaminyltransferase subunit A-like (LOC101308555), mRNA	sp|F4K5W8|SUS5_ARATH/1e-05/Sucrose synthase 5 OS=Arabidopsis thaliana GN=SUS5 PE=2 SV=1	fve:101308555/4e-122/phosphatidylinositol N-acetylglucosaminyltransferase gpi3 subunit-like; K03857 phosphatidylinositol glycan, class A [EC:2.4.1.198]	SPBC3D6.07/4e-53/---	PTHR12526/1.4E-58/--	biological_process:GO:0006506//GPI anchor biosynthetic process;
Unigene11803_All	809	-4.59856	8.01e-27	Down	gi|764632342|ref|XP_011469747.1|/4.26642e-147/PREDICTED: thaumatin-like protein [Fragaria vesca subsp. vesca]	gi|470146468|ref|XM_004308799.1|/0.0/PREDICTED: Fragaria vesca subsp. vesca thaumatin-like protein-like (LOC101291104), mRNA	sp|Q53MB8|TLPH_ORYSJ/9e-95/Thaumatin-like protein OS=Oryza sativa subsp. japonica GN=Os11g0706600 PE=2 SV=1	gmx:100794341/3e-29/BRCA1-A complex subunit BRE-like; K12173 BRCA1-A complex subunit BRE	NA	PS00316/-/Thaumatin family signature.	NA
Unigene16376_All	1428	1.0887	6.84e-17	Up	gi|470114775|ref|XP_004293585.1|/0/PREDICTED: sphingolipid delta(4)-desaturase DES1-like [Fragaria vesca subsp. vesca]	gi|470114774|ref|XM_004293537.1|/0.0/PREDICTED: Fragaria vesca subsp. vesca sphingolipid delta(4)-desaturase DES1-like (LOC101307465), mRNA	NA	fve:101307465/0.0/sphingolipid delta(4)-desaturase DES1-like; K04712 sphingolipid Delta-4 desaturase [EC:1.14.-.-]	NA	PF00487/4.0E-22/Fatty acid desaturase	biological_process:GO:0030148//sphingolipid biosynthetic process;GO:0055114//oxidation-reduction process;cellular_component:GO:0016021//integral component of membrane;molecular_function:GO:0042284//sphingolipid delta-4 desaturase activity;
CL8486.Contig1_All	495	1.93287	2.88e-09	Up	gi|470117829|ref|XP_004295050.1|/8.44134e-65/PREDICTED: desiccation-related protein PCC13-62-like [Fragaria vesca subsp. vesca]	gi|470117828|ref|XM_004295002.1|/0.0/PREDICTED: Fragaria vesca subsp. vesca desiccation-related protein PCC13-62-like (LOC101298404), mRNA	sp|P22242|DRPE_CRAPL/1e-31/Desiccation-related protein PCC13-62 OS=Craterostigma plantagineum PE=2 SV=1	NA	NA	PTHR31694:SF4/1.1E-59/--	NA
CL8205.Contig2_All	949	-3.26678	1.5e-05	Down	gi|764562641|ref|XP_011461493.1|/6.9964e-73/PREDICTED: uncharacterized protein LOC101298298 [Fragaria vesca subsp. vesca]	gi|470117342|ref|XM_004294770.1|/0.0/PREDICTED: Fragaria vesca subsp. vesca uncharacterized LOC101298298 (LOC101298298), mRNA	NA	NA	NA	PTHR31722:SF1/3.6E-23/--	NA
Unigene5809_All	1914	-1.31599	1.26e-05	Down	gi|764558223|ref|XP_004295704.2|/0/PREDICTED: serine/threonine-protein kinase WAG1 [Fragaria vesca subsp. vesca]	gi|470119200|ref|XM_004295656.1|/0.0/PREDICTED: Fragaria vesca subsp. vesca protein kinase G11A-like (LOC101306902), mRNA	sp|Q9C8M5|WAG1_ARATH/2e-179/Serine/threonine-protein kinase WAG1 OS=Arabidopsis thaliana GN=WAG1 PE=2 SV=1	rcu:8287273/8e-90/serine/threonine-protein kinase D6PKL2; K08286 protein-serine/threonine kinase [EC:2.7.11.-]	SPAC17G8.14c_2/1e-35/---	PTHR24351:SF61/3.4E-196/--	biological_process:GO:0006468//protein phosphorylation;molecular_function:GO:0005524//ATP binding;GO:0004672//protein kinase activity;
CL8186.Contig1_All	1338	-1.12931	1.92e-05	Down	gi|764601525|ref|XP_011466585.1|/0/PREDICTED: LOW QUALITY PROTEIN: cation/H(+) antiporter 20-like [Fragaria vesca subsp. vesca]	gi|470138945|ref|XR_185101.1|/0.0/PREDICTED: Fragaria vesca subsp. vesca cation/H(+) antiporter 20-like (LOC101293118), misc_RNA	sp|Q9M353|CHX20_ARATH/6e-180/Cation/H(+) antiporter 20 OS=Arabidopsis thaliana GN=CHX20 PE=2 SV=1	NA	SPAC105.01c/2e-72/---	PTHR32468/1.7E-261/--	biological_process:GO:1902600//hydrogen ion transmembrane transport;cellular_component:GO:0016021//integral component of membrane;molecular_function:GO:0015299//solute:proton antiporter activity;
Unigene11759_All	1002	3.03568	2.61e-11	Up	gi|764528215|ref|XP_004292311.2|/7.46759e-153/PREDICTED: probable pathogenesis-related protein CaO19.6200 [Fragaria vesca subsp. vesca]	gi|470112170|ref|XM_004292263.1|/0.0/PREDICTED: Fragaria vesca subsp. vesca cysteine-rich secretory protein 1-like (LOC101312120), mRNA	sp|P11670|PRB1_TOBAC/3e-38/Basic form of pathogenesis-related protein 1 OS=Nicotiana tabacum PE=3 SV=1	vvi:100242451/2e-43/basic form of pathogenesis-related protein 1; K13449 pathogenesis-related protein 1	YJL078c_1/1e-23/---	PF00188/2.7E-21/Cysteine-rich secretory protein family	cellular_component:GO:0005576//extracellular region;
CL7598.Contig2_All	1157	-1.62152	9.82e-14	Down	gi|470144031|ref|XP_004307670.1|/3.49425e-59/PREDICTED: flavonol synthase/flavanone 3-hydroxylase-like [Fragaria vesca subsp. vesca]	gi|470144030|ref|XM_004307622.1|/1e-176/PREDICTED: Fragaria vesca subsp. vesca flavonol synthase/flavanone 3-hydroxylase-like, transcript variant 1 (LOC101309876), mRNA	sp|Q07512|FLS_PETHY/1e-21/Flavonol synthase/flavanone 3-hydroxylase OS=Petunia hybrida GN=FL PE=2 SV=1	nnu:104609673/1e-24/flavonol synthase/flavanone 3-hydroxylase-like; K05278 flavonol synthase [EC:1.14.11.23]	PA4191/3e-11/---	PS51471/9.98/Fe(2+) 2-oxoglutarate dioxygenase domain profile.	biological_process:GO:0055114//oxidation-reduction process;molecular_function:GO:0005506//iron ion binding;GO:0016491//oxidoreductase activity;
CL602.Contig1_All	471	3.43415	4.53e-06	Up	gi|658062518|ref|XP_008367159.1|/1.01833e-31/PREDICTED: probable beta-1,3-galactosyltransferase 8 [Malus domestica]	gi|470107885|ref|XM_004290221.1|/4e-54/PREDICTED: Fragaria vesca subsp. vesca probable beta-1,3-galactosyltransferase 8-like (LOC101313079), mRNA	sp|Q9C809|B3GT8_ARATH/2e-30/Probable beta-1,3-galactosyltransferase 8 OS=Arabidopsis thaliana GN=B3GALT8 PE=2 SV=1	sita:101781507/3e-29/mitotic spindle checkpoint protein MAD1; K06638 mitotic spindle assembly checkpoint protein MAD1	NA	PTHR11214:SF74/4.4E-21/--	NA
Unigene18425_All	658	-1.64369	1.31e-36	Down	gi|703141590|ref|XP_010107540.1|/5.2434e-08/hypothetical protein L484_024394 [Morus notabilis] &gt;gi|587929047|gb|EXC16222.1| hypothetical protein L484_024394 [Morus notabilis]	gi|470137348|ref|XR_185074.1|/1e-179/PREDICTED: Fragaria vesca subsp. vesca uncharacterized LOC101311691 (LOC101311691), misc_RNA	NA	NA	NA	NA	NA
Unigene1692_All	1349	3.04269	6.85e-08	Up	gi|470111356|ref|XP_004291914.1|/0/PREDICTED: type I inositol 1,4,5-trisphosphate 5-phosphatase 11 [Fragaria vesca subsp. vesca]	gi|470111355|ref|XM_004291866.1|/0.0/PREDICTED: Fragaria vesca subsp. vesca type I inositol 1,4,5-trisphosphate 5-phosphatase 11-like (LOC101310193), mRNA	sp|Q5EAF2|IP5PB_ARATH/2e-97/Type I inositol 1,4,5-trisphosphate 5-phosphatase 11 OS=Arabidopsis thaliana GN=At1g47510 PE=2 SV=1	fve:101310193/0.0/type I inositol 1,4,5-trisphosphate 5-phosphatase 11; K01106 inositol-1,4,5-trisphosphate 5-phosphatase [EC:3.1.3.56]	YNL106c_2/3e-35/---	PTHR11200/4.9E-64/--	biological_process:GO:0046856//phosphatidylinositol dephosphorylation;molecular_function:GO:0016787//hydrolase activity;
CL8991.Contig5_All	1291	1.3182	0.000294034	Up	gi|470119187|ref|XP_004295697.1|/0/PREDICTED: kinesin-like calmodulin-binding protein homolog [Fragaria vesca subsp. vesca]	gi|470119186|ref|XM_004295649.1|/0.0/PREDICTED: Fragaria vesca subsp. vesca uncharacterized LOC101304853 (LOC101304853), mRNA	NA	fve:101304853/0.0/kinesin-like calmodulin-binding protein homolog; K10406 kinesin family member C2/C3	NA	NA	biological_process:GO:0007018//microtubule-based movement;cellular_component:GO:0005874//microtubule;molecular_function:GO:0005524//ATP binding;GO:0003777//microtubule motor activity;GO:0008017//microtubule binding;
Unigene1000_All	881	1.01053	3.01e-09	Up	gi|537361073|ref|NP_001269275.1|/2.05836e-68/MLP-like protein 28-like [Fragaria vesca] &gt;gi|2465015|emb|CAA04770.1| ripening-induced protein [Fragaria vesca]	gi|470122707|ref|XM_004297333.1|/0.0/PREDICTED: Fragaria vesca subsp. vesca MLP-like protein 28-like (LOC101303796), mRNA	sp|Q9SSK9|MLP28_ARATH/2e-27/MLP-like protein 28 OS=Arabidopsis thaliana GN=MLP28 PE=1 SV=1	NA	NA	NA	biological_process:GO:0006952//defense response;GO:0009607//response to biotic stimulus;
Unigene3622_All	1232	-1.05902	2.92e-25	Down	gi|470101946|ref|XP_004287427.1|/0/PREDICTED: heat stress transcription factor C-1 [Fragaria vesca subsp. vesca]	gi|470101945|ref|XM_004287379.1|/0.0/PREDICTED: Fragaria vesca subsp. vesca heat stress transcription factor C-1-like (LOC101304412), mRNA	sp|Q9LV52|HSFC1_ARATH/1e-75/Heat stress transcription factor C-1 OS=Arabidopsis thaliana GN=HSFC1 PE=2 SV=1	fve:101304412/0.0/heat stress transcription factor C-1; K09419 heat shock transcription factor, other eukaryote	SPAC2E12.02.02/3e-22/---	PTHR10015/8.1E-95/--	molecular_function:GO:0003677//DNA binding;
Unigene9017_All	2354	1.88145	5.43e-07	Up	gi|470111362|ref|XP_004291917.1|/0/PREDICTED: probable E3 ubiquitin-protein ligase ARI2 [Fragaria vesca subsp. vesca]	gi|470111361|ref|XM_004291869.1|/0.0/PREDICTED: Fragaria vesca subsp. vesca probable E3 ubiquitin-protein ligase ARI1-like (LOC101311071), mRNA	sp|Q84RR2|ARI2_ARATH/0.0/Probable E3 ubiquitin-protein ligase ARI2 OS=Arabidopsis thaliana GN=ARI2 PE=2 SV=1	fve:101311071/0.0/probable E3 ubiquitin-protein ligase ARI2; K11968 ariadne-1 [EC:2.3.2.27]	NA	PTHR11685:SF119/4.6E-253/--	biological_process:GO:0016567//protein ubiquitination;molecular_function:GO:0008270//zinc ion binding;GO:0004842//ubiquitin-protein transferase activity;
CL3144.Contig1_All	1606	-1.18889	0.00233776	Down	gi|470126095|ref|XP_004299029.1|/0/PREDICTED: uncharacterized PKHD-type hydroxylase At1g22950 [Fragaria vesca subsp. vesca]	gi|470126094|ref|XM_004298981.1|/0.0/PREDICTED: Fragaria vesca subsp. vesca uncharacterized LOC101302356 (LOC101302356), mRNA	sp|Q3ED68|Y1295_ARATH/3e-131/Uncharacterized PKHD-type hydroxylase At1g22950 OS=Arabidopsis thaliana GN=At1g22950 PE=2 SV=2	mdm:103452265/6e-100/phosphatidylserine synthase 2-like; K08730 phosphatidylserine synthase 2 [EC:2.7.8.29]	NA	PS51471/10.016/Fe(2+) 2-oxoglutarate dioxygenase domain profile.	biological_process:GO:0055114//oxidation-reduction process;molecular_function:GO:0016705//oxidoreductase activity, acting on paired donors, with incorporation or reduction of molecular oxygen;GO:0005506//iron ion binding;GO:0031418//L-ascorbic acid binding;
CL1349.Contig5_All	1237	1.29926	0.000802289	Up	NA	gi|470129036|ref|XR_184748.1|/1e-141/PREDICTED: Fragaria vesca subsp. vesca uncharacterized LOC101293493, transcript variant 3 (LOC101293493), misc_RNA	NA	NA	NA	NA	NA
CL6026.Contig2_All	1994	-1.30326	5.59e-30	Down	gi|470137418|ref|XP_004304462.1|/0/PREDICTED: 4-coumarate--CoA ligase-like 7 [Fragaria vesca subsp. vesca]	gi|470137417|ref|XM_004304414.1|/0.0/PREDICTED: Fragaria vesca subsp. vesca 4-coumarate--CoA ligase-like 7-like (LOC101297466), mRNA	sp|Q9M0X9|4CLL7_ARATH/0.0/4-coumarate--CoA ligase-like 7 OS=Arabidopsis thaliana GN=4CLL7 PE=1 SV=1	fve:101297466/0.0/4-coumarate--CoA ligase-like 7; K01904 4-coumarate--CoA ligase [EC:6.2.1.12]	PAE1379/5e-68/---	PF13193/1.1E-11/AMP-binding enzyme C-terminal domain	biological_process:GO:0009695//jasmonic acid biosynthetic process;cellular_component:GO:0005777//peroxisome;molecular_function:GO:0004321//fatty-acyl-CoA synthase activity;GO:0016874//ligase activity;
Unigene10744_All	1376	-2.54099	6.87e-132	Down	gi|764567620|ref|XP_011462226.1|/6.65917e-164/PREDICTED: glycine-rich cell wall structural protein-like [Fragaria vesca subsp. vesca]	gi|332640072|gb|CP002686.1|/7e-12/Arabidopsis thaliana chromosome 3, complete sequence	sp|P27483|GRP1_ARATH/2e-127/Glycine-rich cell wall structural protein OS=Arabidopsis thaliana GN=At3g17050 PE=4 SV=2	sot:102593556/1e-93/formin-like protein 20; K02184 formin 2	XF0818/4e-48/---	NA	NA
Unigene12198_All	581	4.92779	4.47e-15	Up	gi|658021219|ref|XP_008346001.1|/1.74853e-16/PREDICTED: endoplasmic reticulum oxidoreductin-1-like [Malus domestica]	NA	NA	mdm:103408965/3e-17/endoplasmic reticulum oxidoreductin-1-like; K10950 ERO1-like protein alpha [EC:1.8.4.-]	NA	NA	NA
CL1731.Contig3_All	604	1.29272	0.00072505	Up	gi|764516556|ref|XP_011465954.1|/1.58024e-58/PREDICTED: uncharacterized protein LOC105351964 [Fragaria vesca subsp. vesca]	gi|470128195|ref|XR_184713.1|/4e-73/PREDICTED: Fragaria vesca subsp. vesca uncharacterized LOC101292706 (LOC101292706), misc_RNA	NA	NA	NA	NA	NA
Unigene23614_All	448	-2.46208	6.57e-15	Down	gi|470127572|ref|XP_004299742.1|/1.38496e-60/PREDICTED: protein ECERIFERUM 1-like [Fragaria vesca subsp. vesca]	gi|470127571|ref|XM_004299694.1|/0.0/PREDICTED: Fragaria vesca subsp. vesca shikimate O-hydroxycinnamoyltransferase-like (LOC101298892), mRNA	sp|Q39048|CER2_ARATH/2e-22/Protein ECERIFERUM 1 OS=Arabidopsis thaliana GN=CER2 PE=1 SV=1	aip:107641488/5e-07/13-hydroxylupanine O-tigloyltransferase-like; K19861 benzyl alcohol O-benzoyltransferase [EC:2.3.1.196 2.3.1.232]	NA	PF02458/4.5E-13/Transferase family	NA
CL9393.Contig2_All	1228	-1.03964	5.12e-25	Down	gi|470101568|ref|XP_004287242.1|/1.68857e-107/PREDICTED: uncharacterized protein LOC101298453 [Fragaria vesca subsp. vesca]	gi|470101567|ref|XM_004287194.1|/0.0/PREDICTED: Fragaria vesca subsp. vesca uncharacterized LOC101298453 (LOC101298453), mRNA	sp|Q9FPQ6|GP1_CHLRE/2e-17/Vegetative cell wall protein gp1 OS=Chlamydomonas reinhardtii GN=GP1 PE=1 SV=1	aip:107619883/4e-15/formin-like protein 20; K02184 formin 2	Rv3876/2e-13/---	NA	NA
CL1001.Contig2_All	1787	-1.39447	2.42e-118	Down	gi|470127570|ref|XP_004299741.1|/0/PREDICTED: protein ECERIFERUM 1-like [Fragaria vesca subsp. vesca]	gi|470127569|ref|XM_004299693.1|/0.0/PREDICTED: Fragaria vesca subsp. vesca vinorine synthase-like (LOC101298604), mRNA	sp|Q39048|CER2_ARATH/7e-79/Protein ECERIFERUM 1 OS=Arabidopsis thaliana GN=CER2 PE=1 SV=1	cit:102627902/2e-15/omega-hydroxypalmitate O-feruloyl transferase-like; K15400 omega-hydroxypalmitate O-feruloyl transferase [EC:2.3.1.188]	NA	PTHR31642:SF12/3.9E-133/--	biological_process:GO:0009555//pollen development;GO:0010025//wax biosynthetic process;GO:0042761//very long-chain fatty acid biosynthetic process;cellular_component:GO:0005783//endoplasmic reticulum;GO:0005634//nucleus;molecular_function:GO:0016747//transferase activity, transferring acyl groups other than amino-acyl groups;
Unigene9503_All	537	-2.70619	0.000463066	Down	gi|764535102|ref|XP_011458667.1|/1.47695e-69/PREDICTED: uncharacterized protein LOC101299743 [Fragaria vesca subsp. vesca]	gi|470139468|ref|XR_185110.1|/0.0/PREDICTED: Fragaria vesca subsp. vesca uncharacterized LOC101308490 (LOC101308490), partial misc_RNA	NA	mdm:103423936/9e-16/ABC transporter B family member 11-like; K05658 ATP-binding cassette, subfamily B (MDR/TAP), member 1 [EC:3.6.3.44]	NA	PTHR32166/9.7E-29/--	NA
CL628.Contig51_All	1963	1.70659	0.00260033	Up	gi|764599048|ref|XP_011466341.1|/0/PREDICTED: sugar transporter ERD6-like 3 isoform X1 [Fragaria vesca subsp. vesca]	gi|470138579|ref|XM_004304985.1|/0.0/PREDICTED: Fragaria vesca subsp. vesca uncharacterized LOC101307612 (LOC101307612), mRNA	sp|Q3ECP7|ERDL5_ARATH/5e-109/Sugar transporter ERD6-like 5 OS=Arabidopsis thaliana GN=At1g54730 PE=2 SV=2	fve:101308201/0.0/sugar transporter ERD6-like 3; K08145 MFS transporter, SP family, solute carrier family 2 (facilitated glucose transporter), member 8	BS_araE/5e-38/---	PF00083/1.9E-36/Sugar (and other) transporter	NA
CL2480.Contig1_All	1099	3.38525	7.24e-06	Up	gi|470121585|ref|XP_004296843.1|/8.41103e-124/PREDICTED: ubiquitin-like-specific protease ESD4 [Fragaria vesca subsp. vesca]	gi|470121584|ref|XM_004296795.1|/0.0/PREDICTED: Fragaria vesca subsp. vesca ubiquitin-like-specific protease ESD4-like (LOC101310309), mRNA	sp|Q94F30|ESD4_ARATH/2e-91/Ubiquitin-like-specific protease ESD4 OS=Arabidopsis thaliana GN=ESD4 PE=1 SV=1	fve:101310309/1e-124/ubiquitin-like-specific protease ESD4; K08592 sentrin-specific protease 1 [EC:3.4.22.68]	SPBC19G7.09/1e-38/---	PS50600/27.223/Ubiquitin-like protease family profile.	NA
Unigene15791_All	1266	2.90899	4.36e-22	Up	gi|595833761|ref|XP_007206730.1|/1.52124e-26/hypothetical protein PRUPE_ppa024789mg [Prunus persica] &gt;gi|462402372|gb|EMJ07929.1| hypothetical protein PRUPE_ppa024789mg [Prunus persica]	NA	NA	egr:104435240/4e-09/ATP-dependent DNA helicase Q-like 1; K10901 bloom syndrome protein [EC:3.6.4.12]	NA	PF12023/1.0E-21/Domain of unknown function (DUF3511)	NA
Unigene16795_All	693	3.24768	6.89e-06	Up	gi|470121666|ref|XP_004296883.1|/3.92805e-81/PREDICTED: major allergen Pru ar 1-like [Fragaria vesca subsp. vesca]	gi|470121665|ref|XM_004296835.1|/0.0/PREDICTED: Fragaria vesca subsp. vesca major allergen Pru ar 1-like (LOC101297632), mRNA	sp|O50001|PRU1_PRUAR/2e-44/Major allergen Pru ar 1 OS=Prunus armeniaca PE=1 SV=1	NA	NA	PTHR31213/1.7E-17/--	biological_process:GO:0006952//defense response;GO:0009607//response to biotic stimulus;
CL1455.Contig3_All	1419	-3.0347	7.13e-05	Down	gi|802567458|ref|XP_012067718.1|/1.67756e-132/PREDICTED: uncharacterized protein LOC105630501 [Jatropha curcas]	gi|470122477|ref|XM_004297220.1|/0.0/PREDICTED: Fragaria vesca subsp. vesca uncharacterized LOC101295219 (LOC101295219), mRNA	NA	bvg:104904817/7e-06/delta-1-pyrroline-5-carboxylate synthase; K12657 delta-1-pyrroline-5-carboxylate synthetase [EC:2.7.2.11 1.2.1.41]	MTH47/3e-18/---	PF00696/1.1E-36/Amino acid kinase family	NA
Unigene22725_All	1301	-2.37258	7.77e-39	Down	gi|470112175|ref|XP_004292313.1|/0/PREDICTED: xylem cysteine proteinase 1 [Fragaria vesca subsp. vesca]	gi|470112174|ref|XM_004292265.1|/0.0/PREDICTED: Fragaria vesca subsp. vesca xylem cysteine proteinase 1-like (LOC101312696), mRNA	sp|O65493|XCP1_ARATH/9e-152/Xylem cysteine proteinase 1 OS=Arabidopsis thaliana GN=XCP1 PE=1 SV=1	fve:101312696/0.0/xylem cysteine proteinase 1; K16290 xylem cysteine proteinase [EC:3.4.22.-]	AF1946_2/2e-18/---	SM00645/3.4E-126/Papain family cysteine protease	NA
Unigene994_All	796	1.6308	5.81e-08	Up	gi|470136900|ref|XP_004304219.1|/1.31526e-76/PREDICTED: protein SPIRAL1-like 2 [Fragaria vesca subsp. vesca]	gi|470136899|ref|XM_004304171.1|/0.0/PREDICTED: Fragaria vesca subsp. vesca protein SPIRAL1-like 1-like (LOC101291356), mRNA	sp|B3H4F1|SP1L1_ARATH/2e-29/Protein SPIRAL1-like 1 OS=Arabidopsis thaliana GN=SP1L1 PE=2 SV=1	fve:101291356/2e-77/protein SPIRAL1-like 2; K18635 protein SPIRAL1 and related proteins	NA	NA	NA
CL3905.Contig11_All	864	-2.31442	0.00296785	Down	gi|764579778|ref|XP_011463737.1|/2.63428e-145/PREDICTED: flavin-containing monooxygenase FMO GS-OX-like 4 [Fragaria vesca subsp. vesca] &gt;gi|764579780|ref|XP_011463738.1| PREDICTED: flavin-containing monooxygenase FMO GS-OX-like 4 [Fragaria vesca subsp. vesca]	gi|470129623|ref|XM_004300661.1|/0.0/PREDICTED: Fragaria vesca subsp. vesca flavin-containing monooxygenase FMO GS-OX-like 3-like (LOC101307992), mRNA	sp|Q94BV5|GSXL4_ARATH/1e-95/Flavin-containing monooxygenase FMO GS-OX-like 4 OS=Arabidopsis thaliana GN=At1g62600 PE=2 SV=1	pmum:103340670/1e-18/probable flavin-containing monooxygenase 1; K00485 dimethylaniline monooxygenase (N-oxide forming) [EC:1.14.13.8]	Cgl1117/1e-23/---	PTHR23023:SF4/2.6E-97/--	biological_process:GO:0055114//oxidation-reduction process;molecular_function:GO:0050661//NADP binding;GO:0004499//N,N-dimethylaniline monooxygenase activity;GO:0050660//flavin adenine dinucleotide binding;
Unigene12127_All	913	-3.93207	6.17e-08	Down	gi|470112490|ref|XP_004292467.1|/3.91863e-126/PREDICTED: allene oxide synthase-like [Fragaria vesca subsp. vesca]	gi|470112489|ref|XM_004292419.1|/0.0/PREDICTED: Fragaria vesca subsp. vesca allene oxide synthase-like (LOC101292090), mRNA	sp|Q40778|C74A2_PARAR/4e-80/Allene oxide synthase OS=Parthenium argentatum GN=CYP74A2 PE=1 SV=2	fve:101292090/7e-127/allene oxide synthase-like; K01723 hydroperoxide dehydratase [EC:4.2.1.92]	NA	PTHR24286:SF38/2.2E-73/--	NA
Unigene13543_All	551	-1.30106	4.65e-07	Down	gi|657995646|ref|XP_008390169.1|/2.17847e-47/PREDICTED: DNA (cytosine-5)-methyltransferase CMT3 [Malus domestica]	gi|470117651|ref|XR_184301.1|/1e-97/PREDICTED: Fragaria vesca subsp. vesca uncharacterized LOC101295207 (LOC101295207), misc_RNA	NA	mdm:103452459/4e-48/DNA (cytosine-5)-methyltransferase CMT3; K00558 DNA (cytosine-5)-methyltransferase 1 [EC:2.1.1.37]	NA	NA	biological_process:GO:0032259//methylation;cellular_component:GO:0005634//nucleus;GO:0016021//integral component of membrane;molecular_function:GO:0008168//methyltransferase activity;GO:0003682//chromatin binding;
CL4544.Contig3_All	3069	1.23677	4.01e-05	Up	gi|470145925|ref|XP_004308582.1|/0/PREDICTED: lon protease homolog 1, mitochondrial-like [Fragaria vesca subsp. vesca]	gi|470145924|ref|XM_004308534.1|/0.0/PREDICTED: Fragaria vesca subsp. vesca lon protease homolog 1, mitochondrial-like (LOC101296152), mRNA	sp|P93655|LONM1_ARATH/0.0/Lon protease homolog 1, mitochondrial OS=Arabidopsis thaliana GN=LON1 PE=1 SV=2	fve:101296152/0.0/lon protease homolog 1, mitochondrial-like; K08675 Lon-like ATP-dependent protease [EC:3.4.21.-]	SPAC22F3.06c/0.0/---	PR00830/1.2E-51/Endopeptidase La (Lon) serine protease (S16) signature	biological_process:GO:0090296//regulation of mitochondrial DNA replication;GO:0051131//chaperone-mediated protein complex assembly;GO:0034599//cellular response to oxidative stress;GO:0070407//oxidation-dependent protein catabolic process;GO:0006515//misfolded or incompletely synthesized protein catabolic process;cellular_component:GO:0005759//mitochondrial matrix;molecular_function:GO:0004252//s…
CL1887.Contig4_All	1871	2.70179	2.6e-06	Up	gi|629089318|gb|KCW55571.1|/2.894e-102/hypothetical protein EUGRSUZ_I01441 [Eucalyptus grandis]	gi|470108887|ref|XM_004290686.1|/1e-139/PREDICTED: Fragaria vesca subsp. vesca FAD-dependent urate hydroxylase-like (LOC101291006), mRNA	sp|O81360|ABA2_PRUAR/2e-07/Zeaxanthin epoxidase, chloroplastic OS=Prunus armeniaca PE=2 SV=1	cmo:103503469/3e-14/uncharacterized LOC103503469; K00480 salicylate hydroxylase [EC:1.14.13.1]	PA3328/1e-08/---	PTHR13789/2.3E-79/--	NA
Unigene14547_All	410	3.1725	2.71e-05	Up	gi|764513711|ref|XP_011463745.1|/4.67899e-37/PREDICTED: uncharacterized protein LOC105351396 [Fragaria vesca subsp. vesca]	NA	NA	NA	NA	NA	cellular_component:GO:0005634//nucleus;
Unigene22793_All	1317	4.41149	9.23e-49	Up	gi|470139710|ref|XP_004305589.1|/1.14637e-165/PREDICTED: uncharacterized protein LOC101304211 [Fragaria vesca subsp. vesca]	gi|470139709|ref|XM_004305541.1|/0.0/PREDICTED: Fragaria vesca subsp. vesca uncharacterized LOC101304211 (LOC101304211), mRNA	sp|Q8S8M0|CYT1A_ARATH/6e-07/CYSTM1 family protein A OS=Arabidopsis thaliana GN=At2g41420 PE=3 SV=1	NA	NA	PTHR31852/1.3E-14/--	NA
Unigene9412_All	1426	3.19683	1.98e-14	Up	gi|470115480|ref|XP_004293927.1|/0/PREDICTED: phospholipase A1-IIgamma-like [Fragaria vesca subsp. vesca]	gi|470115479|ref|XM_004293879.1|/0.0/PREDICTED: Fragaria vesca subsp. vesca phospholipase A1-IIgamma-like (LOC101314924), mRNA	sp|O49523|DSEL_ARATH/4e-144/Phospholipase A1-IIgamma OS=Arabidopsis thaliana GN=DSEL PE=1 SV=1	gmx:100817287/5e-51/phospholipase A(1) DAD1, chloroplastic-like; K16818 phospholipase A1 [EC:3.1.1.32]	sll0482/9e-15/---	PF01764/7.5E-41/Lipase (class 3)	NA
Unigene14180_All	2929	3.29012	8.89e-26	Up	gi|764610540|ref|XP_011467515.1|/0/PREDICTED: U-box domain-containing protein 35-like [Fragaria vesca subsp. vesca]	gi|470140127|ref|XM_004305748.1|/0.0/PREDICTED: Fragaria vesca subsp. vesca U-box domain-containing protein 35-like (LOC101301608), mRNA	sp|Q9SW11|PUB35_ARATH/5e-127/U-box domain-containing protein 35 OS=Arabidopsis thaliana GN=PUB35 PE=1 SV=2	aly:ARALYDRAFT_491618/0.0/kinase family protein; K17609 nucleoredoxin [EC:1.8.1.8]	Cgl2127_1/3e-20/---	PTHR24420:SF682/7.6E-203/--	NA
CL8286.Contig2_All	3928	-1.47271	7.29e-05	Down	gi|470138801|ref|XP_004305142.1|/0/PREDICTED: BTB/POZ domain-containing protein At3g09030 [Fragaria vesca subsp. vesca]	gi|470138800|ref|XM_004305094.1|/0.0/PREDICTED: Fragaria vesca subsp. vesca BTB/POZ domain-containing protein At3g09030-like (LOC101293218), mRNA	sp|Q9S7R7|Y3903_ARATH/6e-166/BTB/POZ domain-containing protein At3g09030 OS=Arabidopsis thaliana GN=At3g09030 PE=2 SV=1	mdm:103441863/2e-21/serine/threonine-protein kinase AtPK1/AtPK6-like; K04688 p70 ribosomal S6 kinase [EC:2.7.11.1]	NA	PF02214/1.3E-14/BTB/POZ domain	NA
CL1367.Contig1_All	1095	1.13474	0.000296663	Up	gi|470146556|ref|XP_004308890.1|/1.24568e-135/PREDICTED: psbP-like protein 1, chloroplastic isoform X1 [Fragaria vesca subsp. vesca]	gi|470146555|ref|XM_004308842.1|/0.0/PREDICTED: Fragaria vesca subsp. vesca psbP-like protein 1, chloroplastic-like (LOC101306480), mRNA	sp|P82538|PPL1_ARATH/1e-72/PsbP-like protein 1, chloroplastic OS=Arabidopsis thaliana GN=PPL1 PE=1 SV=1	fve:101306480/2e-136/psbP-like protein 1, chloroplastic; K02717 photosystem II oxygen-evolving enhancer protein 2	NA	PTHR31407/6.1E-101/--	biological_process:GO:0015979//photosynthesis;cellular_component:GO:0031977//thylakoid lumen;GO:0019898//extrinsic component of membrane;GO:0009507//chloroplast;GO:0009654//photosystem II oxygen evolving complex;molecular_function:GO:0005509//calcium ion binding;
CL8999.Contig1_All	1925	-1.50805	7.1e-47	Down	gi|595906010|ref|XP_007214098.1|/5.61787e-170/hypothetical protein PRUPE_ppa015879mg [Prunus persica] &gt;gi|462409963|gb|EMJ15297.1| hypothetical protein PRUPE_ppa015879mg [Prunus persica]	gi|470113895|ref|XM_004293107.1|/0.0/PREDICTED: Fragaria vesca subsp. vesca O-acyltransferase WSD1-like (LOC101314157), mRNA	sp|Q93ZR6|WSD1_ARATH/2e-37/O-acyltransferase WSD1 OS=Arabidopsis thaliana GN=WSD1 PE=2 SV=1	bna:106451554/3e-38/O-acyltransferase WSD1-like; K15406 wax-ester synthase / diacylglycerol O-acyltransferase [EC:2.3.1.75 2.3.1.20]	NA	PTHR31650/1.2E-46/--	biological_process:GO:0045017//glycerolipid biosynthetic process;molecular_function:GO:0004144//diacylglycerol O-acyltransferase activity;
CL794.Contig7_All	1265	1.62031	0.00133569	Up	NA	gi|470135249|ref|XR_184963.1|/1e-19/PREDICTED: Fragaria vesca subsp. vesca uncharacterized LOC101314481, transcript variant 2 (LOC101314481), misc_RNA	NA	NA	NA	NA	NA
CL8195.Contig1_All	1955	-1.1092	1.48e-06	Down	gi|470128558|ref|XP_004300205.1|/0/PREDICTED: probable transcription factor KAN2 isoform X5 [Fragaria vesca subsp. vesca]	gi|470128557|ref|XM_004300157.1|/0.0/PREDICTED: Fragaria vesca subsp. vesca uncharacterized LOC101297253 (LOC101297253), mRNA	sp|Q9C616|KAN2_ARATH/7e-91/Probable transcription factor KAN2 OS=Arabidopsis thaliana GN=KAN2 PE=2 SV=1	mus:103984394/2e-13/uncharacterized protein LOC103984394; K14317 nuclear pore complex protein Nup214	NA	PTHR31496/1.3E-61/--	NA
CL1791.Contig2_All	3205	1.00765	2.03e-06	Up	gi|470102942|ref|XP_004287907.1|/0/PREDICTED: U1 small nuclear ribonucleoprotein 70 kDa [Fragaria vesca subsp. vesca]	gi|470102941|ref|XM_004287859.1|/0.0/PREDICTED: Fragaria vesca subsp. vesca U1 small nuclear ribonucleoprotein 70 kDa-like (LOC101304805), mRNA	sp|Q42404|RU17_ARATH/5e-75/U1 small nuclear ribonucleoprotein 70 kDa OS=Arabidopsis thaliana GN=RNU1 PE=1 SV=1	fve:101304805/0.0/U1 small nuclear ribonucleoprotein 70 kDa; K11093 U1 small nuclear ribonucleoprotein 70kDa	SPAC19A8.13/1e-20/---	PTHR13952:SF5/5.6E-63/--	biological_process:GO:0000398//mRNA splicing, via spliceosome;cellular_component:GO:0005634//nucleus;molecular_function:GO:0000166//nucleotide binding;GO:0003676//nucleic acid binding;
CL7291.Contig2_All	2806	-1.00127	1.48e-35	Down	gi|470134421|ref|XP_004303051.1|/0/PREDICTED: uncharacterized protein LOC101313325 [Fragaria vesca subsp. vesca]	gi|470134420|ref|XM_004303003.1|/0.0/PREDICTED: Fragaria vesca subsp. vesca uncharacterized LOC101313325 (LOC101313325), mRNA	NA	NA	TVN0677/2e-08/---	PTHR14255:SF5/3.3E-264/--	cellular_component:GO:0016021//integral component of membrane;
Unigene5684_All	1039	-3.87831	1.07e-07	Down	gi|470138900|ref|XP_004305191.1|/7.61806e-156/PREDICTED: protein SRG1-like [Fragaria vesca subsp. vesca]	gi|470138899|ref|XM_004305143.1|/0.0/PREDICTED: Fragaria vesca subsp. vesca protein SRG1-like (LOC101310920), mRNA	sp|D4N502|DIOX3_PAPSO/2e-55/Codeine O-demethylase OS=Papaver somniferum GN=CODM PE=1 SV=1	pda:103712517/1e-47/flavonol synthase/flavanone 3-hydroxylase; K05278 flavonol synthase [EC:1.14.11.23]	PA0147/5e-24/---	PF03171/4.5E-26/2OG-Fe(II) oxygenase superfamily	biological_process:GO:0055114//oxidation-reduction process;molecular_function:GO:0046872//metal ion binding;GO:0016491//oxidoreductase activity;
CL604.Contig4_All	820	-1.38853	8.93e-12	Down	gi|920679336|gb|KOM26248.1|/1.74613e-103/hypothetical protein LR48_Vigan238s008100 [Vigna angularis]	gi|502148257|ref|XM_004507039.1|/2e-57/PREDICTED: Cicer arietinum extensin-2-like (LOC101492248), mRNA	sp|Q9M1G9|EXTN2_ARATH/1e-67/Extensin-2 OS=Arabidopsis thaliana GN=EXT2 PE=2 SV=1	sind:105163614/5e-62/extensin-2-like; K05747 Wiskott-Aldrich syndrome protein	XF0818/2e-26/---	NA	NA
Unigene4997_All	846	3.0618	3.65e-07	Up	NA	NA	NA	NA	NA	NA	NA
CL930.Contig1_All	2559	-2.23574	0.00408304	Down	gi|470126582|ref|XP_004299262.1|/0/PREDICTED: uridine-cytidine kinase C isoform X1 [Fragaria vesca subsp. vesca] &gt;gi|764583423|ref|XP_011464265.1| PREDICTED: uridine-cytidine kinase C isoform X1 [Fragaria vesca subsp. vesca]	gi|470126581|ref|XM_004299214.1|/0.0/PREDICTED: Fragaria vesca subsp. vesca uridine-cytidine kinase C-like (LOC101300724), mRNA	sp|Q8VYB2|UKL3_ARATH/1e-16/Uridine kinase-like protein 3 OS=Arabidopsis thaliana GN=UKL3 PE=2 SV=1	vra:106767052/4e-18/uridine kinase-like protein 1, chloroplastic; K00876 uridine kinase [EC:2.7.1.48]	SA1439/1e-22/---	PTHR10285/3.2E-183/--	biological_process:GO:0016310//phosphorylation;cellular_component:GO:0016021//integral component of membrane;molecular_function:GO:0005524//ATP binding;GO:0016301//kinase activity;
Unigene8945_All	1673	-1.15664	1.1e-64	Down	gi|470122513|ref|XP_004297285.1|/0/PREDICTED: uncharacterized protein LOC101300242 [Fragaria vesca subsp. vesca]	gi|470122512|ref|XM_004297237.1|/0.0/PREDICTED: Fragaria vesca subsp. vesca uncharacterized LOC101300242 (LOC101300242), mRNA	NA	apro:F751_1333/4e-32/Vacuolar-processing enzyme beta-isozyme; K01369 legumain [EC:3.4.22.34]	NA	NA	NA
CL5899.Contig2_All	1493	2.49117	1.16e-07	Up	gi|470122547|ref|XP_004297302.1|/1.5567e-161/PREDICTED: uncharacterized protein LOC101305065 [Fragaria vesca subsp. vesca] &gt;gi|764575328|ref|XP_011463070.1| PREDICTED: uncharacterized protein LOC101305065 [Fragaria vesca subsp. vesca] &gt;gi|764575332|ref|XP_011463071.1| PREDICTED: uncharacterized protein LOC101305065 [Fragaria vesca subsp. vesca]	gi|470122546|ref|XM_004297254.1|/0.0/PREDICTED: Fragaria vesca subsp. vesca uncharacterized LOC101305065 (LOC101305065), mRNA	sp|F4JKK0|SUD1_ARATH/4e-08/Probable E3 ubiquitin ligase SUD1 OS=Arabidopsis thaliana GN=SUD1 PE=1 SV=1	cit:102617124/8e-10/probable E3 ubiquitin ligase SUD1; K10661 E3 ubiquitin-protein ligase MARCH6 [EC:2.3.2.27]	ECU06g0830/9e-07/---	PF12428/8.0E-41/Protein of unknown function (DUF3675)	NA
CL562.Contig1_All	871	3.26184	8.48e-14	Up	gi|84322434|gb|ABC55724.1|/1.67491e-139/osmotin-like protein [Fragaria x ananassa]	gi|470125580|ref|XM_004298732.1|/0.0/PREDICTED: Fragaria vesca subsp. vesca thaumatin-like protein-like (LOC101300343), mRNA	sp|P81370|TLP_ACTDE/1e-97/Thaumatin-like protein OS=Actinidia deliciosa GN=tlp PE=1 SV=2	gmx:100794341/1e-21/BRCA1-A complex subunit BRE-like; K12173 BRCA1-A complex subunit BRE	NA	PS51367/48.424/Thaumatin family profile.	NA
Unigene18201_All	1025	2.83695	1.14e-11	Up	gi|470102380|ref|XP_004287632.1|/1.97594e-124/PREDICTED: MOB kinase activator-like 1 [Fragaria vesca subsp. vesca]	gi|470102379|ref|XM_004287584.1|/0.0/PREDICTED: Fragaria vesca subsp. vesca MOB kinase activator-like 1-like (LOC101295075), mRNA	sp|Q8GYX0|MOB1_ARATH/1e-109/MOB kinase activator-like 1 OS=Arabidopsis thaliana GN=At4g19045 PE=2 SV=1	fve:101295075/4e-125/MOB kinase activator-like 1; K06685 MOB kinase activator 1	NA	PF03637/1.4E-73/Mob1/phocein family	NA
CL2748.Contig1_All	695	-1.51877	9.84e-122	Down	gi|764618340|ref|XP_011468238.1|/3.50727e-45/PREDICTED: uncharacterized protein LOC105352540 isoform X1 [Fragaria vesca subsp. vesca]	NA	NA	NA	NA	NA	NA
CL3703.Contig2_All	1463	1.7757	1.46e-07	Up	gi|764641722|ref|XP_004309578.2|/0/PREDICTED: GDSL esterase/lipase At5g41890 [Fragaria vesca subsp. vesca]	gi|470148029|ref|XM_004309530.1|/0.0/PREDICTED: Fragaria vesca subsp. vesca GDSL esterase/lipase At5g41890-like (LOC101292473), mRNA	sp|Q9FJ25|GDL81_ARATH/7e-138/GDSL esterase/lipase At5g41890 OS=Arabidopsis thaliana GN=At5g41890 PE=3 SV=1	atr:18422248/2e-58/geranylgeranyl diphosphate reductase, chloroplastic; K10960 geranylgeranyl reductase [EC:1.3.1.83]	all3634/2e-14/---	PF00657/6.2E-30/GDSL-like Lipase/Acylhydrolase	molecular_function:GO:0016788//hydrolase activity, acting on ester bonds;
Unigene11252_All	631	-1.19637	0.00139289	Down	NA	gi|33342310|gb|AC140774.7|/8e-07/Medicago truncatula clone mth2-5e11, complete sequence	NA	NA	NA	NA	NA
CL2669.Contig2_All	2204	-1.53093	7.35e-09	Down	gi|470129708|ref|XP_004300751.1|/0/PREDICTED: molybdenum cofactor sulfurase 3-like [Fragaria vesca subsp. vesca]	gi|470129707|ref|XM_004300703.1|/0.0/PREDICTED: Fragaria vesca subsp. vesca molybdenum cofactor sulfurase-like (LOC101296295), mRNA	sp|Q9C5X8|MOCOS_ARATH/1e-18/Molybdenum cofactor sulfurase OS=Arabidopsis thaliana GN=ABA3 PE=1 SV=1	pda:103722273/5e-35/molybdenum cofactor sulfurase-like; K15631 molybdenum cofactor sulfurtransferase [EC:2.8.1.9]	MA1950/7e-38/---	PTHR14237:SF12/6.6E-227/--	molecular_function:GO:0003824//catalytic activity;
CL4277.Contig2_All	883	2.17019	8.76e-06	Up	gi|470134957|ref|XP_004303302.1|/2.49094e-122/PREDICTED: umecyanin-like [Fragaria vesca subsp. vesca]	gi|470134956|ref|XM_004303254.1|/0.0/PREDICTED: Fragaria vesca subsp. vesca blue copper protein-like (LOC101296121), mRNA	sp|Q07488|BCB1_ARATH/1e-26/Blue copper protein OS=Arabidopsis thaliana GN=BCB PE=1 SV=2	bdi:100822183/5e-07/peroxidase 46-like; K00430 peroxidase [EC:1.11.1.7]	PAE0061/1e-07/---	PS51485/38.893/Phytocyanin domain profile.	NA
CL6952.Contig1_All	673	3.24192	5.5e-09	Up	gi|470123869|ref|XP_004297942.1|/7.47697e-82/PREDICTED: uncharacterized protein LOC101291521 [Fragaria vesca subsp. vesca]	gi|470123868|ref|XM_004297894.1|/0.0/PREDICTED: Fragaria vesca subsp. vesca uncharacterized LOC101291521 (LOC101291521), mRNA	NA	NA	NA	PTHR31964:SF5/1.8E-15/--	NA
Unigene5765_All	1384	-1.42802	0.00128693	Down	gi|764637673|ref|XP_004309213.2|/0/PREDICTED: WD repeat-containing protein RUP2 [Fragaria vesca subsp. vesca]	gi|470147219|ref|XM_004309165.1|/0.0/PREDICTED: Fragaria vesca subsp. vesca E3 ubiquitin-protein ligase COP1-like (LOC101292653), mRNA	sp|Q9FFA7|RUP2_ARATH/6e-135/WD repeat-containing protein RUP2 OS=Arabidopsis thaliana GN=RUP2 PE=1 SV=1	fve:101292653/0.0/WD repeat-containing protein RUP2; K10143 E3 ubiquitin-protein ligase RFWD2 [EC:2.3.2.27]	all0438_2/4e-09/---	SM00320/420.0/WD40 repeats	molecular_function:GO:0016874//ligase activity;
CL938.Contig1_All	1795	3.11594	3.57e-12	Up	gi|470132536|ref|XP_004302136.1|/0/PREDICTED: cytochrome P450 714C2-like [Fragaria vesca subsp. vesca]	gi|470132535|ref|XM_004302088.1|/0.0/PREDICTED: Fragaria vesca subsp. vesca cytochrome P450 734A1-like (LOC101306349), mRNA	sp|Q2QYH7|C14C2_ORYSJ/9e-156/Cytochrome P450 714C2 OS=Oryza sativa subsp. japonica GN=CYP714C2 PE=2 SV=1	sind:105177944/1e-95/cytokinin hydroxylase; K10717 cytokinin trans-hydroxylase	Cj1411c/5e-42/---	PF00067/1.8E-83/Cytochrome P450	biological_process:GO:0055114//oxidation-reduction process;cellular_component:GO:0016021//integral component of membrane;molecular_function:GO:0016705//oxidoreductase activity, acting on paired donors, with incorporation or reduction of molecular oxygen;GO:0020037//heme binding;GO:0005506//iron ion binding;GO:0004497//monooxygenase activity;
Unigene13826_All	1589	-1.15691	9.36e-07	Down	gi|470139770|ref|XP_004305619.1|/0/PREDICTED: uncharacterized protein LOC101312951 [Fragaria vesca subsp. vesca]	gi|470139769|ref|XM_004305571.1|/0.0/PREDICTED: Fragaria vesca subsp. vesca uncharacterized LOC101312951 (LOC101312951), mRNA	NA	obr:102701992/2e-17/AP2-like ethylene-responsive transcription factor ANT; K09285 AP2-like factor, ANT lineage	NA	NA	NA
Unigene4036_All	898	-1.73055	2.09e-09	Down	gi|470136407|ref|XP_004303985.1|/2.50404e-93/PREDICTED: basic blue protein [Fragaria vesca subsp. vesca]	gi|470136406|ref|XM_004303937.1|/0.0/PREDICTED: Fragaria vesca subsp. vesca blue copper protein-like (LOC101293907), mRNA	sp|Q41001|BCP_PEA/2e-25/Blue copper protein OS=Pisum sativum PE=2 SV=1	NA	NA	PS51485/39.035/Phytocyanin domain profile.	cellular_component:GO:0016020//membrane;
CL1416.Contig2_All	1324	1.40613	9.08e-16	Up	gi|470117481|ref|XP_004294886.1|/9.54987e-128/PREDICTED: uncharacterized protein LOC101294445 [Fragaria vesca subsp. vesca] &gt;gi|764563169|ref|XP_011461570.1| PREDICTED: uncharacterized protein LOC101294445 [Fragaria vesca subsp. vesca]	gi|470117480|ref|XM_004294838.1|/0.0/PREDICTED: Fragaria vesca subsp. vesca uncharacterized LOC101294445 (LOC101294445), mRNA	NA	NA	NA	NA	cellular_component:GO:0016021//integral component of membrane;
CL707.Contig6_All	2083	1.57627	5.6e-07	Up	gi|764599472|ref|XP_011466389.1|/0/PREDICTED: uncharacterized protein LOC101296115 [Fragaria vesca subsp. vesca] &gt;gi|764599477|ref|XP_011466390.1| PREDICTED: uncharacterized protein LOC101296115 [Fragaria vesca subsp. vesca] &gt;gi|764599480|ref|XP_011466391.1| PREDICTED: uncharacterized protein LOC101296115 [Fragaria vesca subsp. vesca] &gt;gi|764599484|ref|XP_011466392.1| PREDICTED: uncharac…	gi|470133299|ref|XM_004302457.1|/0.0/PREDICTED: Fragaria vesca subsp. vesca uncharacterized LOC101296115, transcript variant 1 (LOC101296115), mRNA	NA	pop:POPTR_0005s10230g/5e-65/POPTRDRAFT_760338; auxin efflux carrier family protein; K07088 uncharacterized protein	SPAC5D6.04/3e-18/---	PTHR31419/6.2E-197/--	NA
Unigene2792_All	1478	-1.2265	0.00450367	Down	gi|133711804|gb|ABO36622.1|/3.01692e-133/copia LTR rider [Solanum lycopersicum] &gt;gi|133711819|gb|ABO36636.1| copia LTR rider [Solanum lycopersicum]	gi|470149519|ref|XM_004310234.1|/1e-151/PREDICTED: Fragaria vesca subsp. vesca disease resistance protein At4g27190-like (LOC101306202), mRNA	sp|P10978|POLX_TOBAC/3e-77/Retrovirus-related Pol polyprotein from transposon TNT 1-94 OS=Nicotiana tabacum PE=2 SV=1	bvg:104905624/7e-68/uncharacterized LOC104905624; K05658 ATP-binding cassette, subfamily B (MDR/TAP), member 1 [EC:3.6.3.44]	NA	PTHR11439/1.9E-116/--	biological_process:GO:0015074//DNA integration;molecular_function:GO:0008270//zinc ion binding;GO:0003676//nucleic acid binding;
CL3886.Contig1_All	1244	4.23247	1.35e-26	Up	gi|764586938|ref|XP_011464709.1|/5.32446e-109/PREDICTED: phospholipase A2-alpha isoform X1 [Fragaria vesca subsp. vesca]	gi|470127638|ref|XM_004299727.1|/0.0/PREDICTED: Fragaria vesca subsp. vesca phospholipase A2-alpha-like (LOC101308871), mRNA	sp|Q8S8N6|PLA2A_ARATH/2e-49/Phospholipase A2-alpha OS=Arabidopsis thaliana GN=PLA2-ALPHA PE=1 SV=1	fve:101308871/1e-64/phospholipase A2-alpha; K01047 secretory phospholipase A2 [EC:3.1.1.4]	NA	PS00118/-/Phospholipase A2 histidine active site.	NA
Unigene9237_All	760	2.51775	0.000827934	Up	gi|764566643|ref|XP_011462007.1|/3.00766e-51/PREDICTED: uncharacterized protein LOC105350779 [Fragaria vesca subsp. vesca]	NA	NA	mdm:103418181/5e-46/uncharacterized LOC103418181; K11303 histone acetyltransferase 1 [EC:2.3.1.48]	NA	PTHR11439:SF127/3.7E-15/--	NA
CL7012.Contig3_All	2628	-1.01457	0.00412724	Down	gi|764607213|ref|XP_004303381.2|/0/PREDICTED: ABC transporter G family member 22 isoform X1 [Fragaria vesca subsp. vesca]	gi|470135138|ref|XM_004303333.1|/0.0/PREDICTED: Fragaria vesca subsp. vesca ABC transporter G family member 22-like (LOC101297560), mRNA	sp|Q93YS4|AB22G_ARATH/0.0/ABC transporter G family member 22 OS=Arabidopsis thaliana GN=ABCG22 PE=1 SV=1	cme:CYME_CMS467C/4e-87/ATP-binding cassette, sub-family G, member 2; K05681 ATP-binding cassette, subfamily G (WHITE), member 2	YCR011c_2/5e-51/---	PS50893/21.675/ATP-binding cassette, ABC transporter-type domain profile.	NA
CL542.Contig1_All	1612	1.2624	3.9e-11	Up	gi|470110920|ref|XP_004291707.1|/0/PREDICTED: uncharacterized membrane protein At1g06890 [Fragaria vesca subsp. vesca]	gi|470110919|ref|XM_004291659.1|/0.0/PREDICTED: Fragaria vesca subsp. vesca uncharacterized LOC101295302 (LOC101295302), mRNA	sp|Q8RXL8|Y1689_ARATH/4e-122/Uncharacterized membrane protein At1g06890 OS=Arabidopsis thaliana GN=At1g06890 PE=1 SV=1	fve:101295302/0.0/uncharacterized membrane protein At1g06890; K15285 solute carrier family 35, member E3	ECU03g0150/4e-09/---	PTHR11132/5.0E-217/--	cellular_component:GO:0016021//integral component of membrane;
CL127.Contig4_All	1309	3.36235	7.65e-06	Up	gi|764597276|ref|XP_011466158.1|/2.78057e-79/PREDICTED: kinesin-4-like isoform X2 [Fragaria vesca subsp. vesca]	gi|470108560|ref|XM_004290536.1|/0.0/PREDICTED: Fragaria vesca subsp. vesca kinesin-4-like (LOC101291484), mRNA	sp|O81635|ATK4_ARATH/2e-53/Kinesin-4 OS=Arabidopsis thaliana GN=ATK4 PE=1 SV=2	fve:101304022/5e-80/kinesin-4-like; K10406 kinesin family member C2/C3	SPAC664.10/8e-20/---	NA	molecular_function:GO:0005488//binding;
Unigene6443_All	815	1.061	0.0025877	Up	gi|764586114|ref|XP_011464607.1|/1.41172e-97/PREDICTED: uncharacterized protein LOC105351563 [Fragaria vesca subsp. vesca]	NA	NA	NA	NA	NA	NA
Unigene24431_All	261	-1.09765	2.55e-16	Down	gi|731388894|ref|XP_010649784.1|/4.2708e-18/PREDICTED: cuticle collagen 2 isoform X1 [Vitis vinifera]	NA	sp|Q84ZL0|FH5_ORYSJ/2e-14/Formin-like protein 5 OS=Oryza sativa subsp. japonica GN=FH5 PE=2 SV=2	bdi:100833447/8e-13/formin-like protein 12; K02184 formin 2	XF0818/2e-08/---	NA	NA
Unigene16282_All	1374	-1.92069	5.45e-26	Down	gi|470108524|ref|XP_004290566.1|/0/PREDICTED: acyl-[acyl-carrier-protein] desaturase 6, chloroplastic [Fragaria vesca subsp. vesca]	gi|470108523|ref|XM_004290518.1|/0.0/PREDICTED: Fragaria vesca subsp. vesca acyl-[acyl-carrier-protein] desaturase 6, chloroplastic-like (LOC101310767), mRNA	sp|Q84VY3|STAD6_ARATH/2e-157/Acyl-[acyl-carrier-protein] desaturase 6, chloroplastic OS=Arabidopsis thaliana GN=S-ACP-DES6 PE=2 SV=2	fve:101310767/0.0/acyl-[acyl-carrier-protein] desaturase 6, chloroplastic; K03921 acyl-[acyl-carrier-protein] desaturase [EC:1.14.19.2 1.14.19.11 1.14.19.26]	NA	PTHR31155/1.5E-244/--	NA
Unigene20945_All	2353	-2.53095	6.58e-160	Down	gi|470114731|ref|XP_004293563.1|/0/PREDICTED: polyphenol oxidase, chloroplastic-like [Fragaria vesca subsp. vesca]	gi|470114730|ref|XM_004293515.1|/0.0/PREDICTED: Fragaria vesca subsp. vesca polyphenol oxidase, chloroplastic-like (LOC101301080), mRNA	sp|P43309|PPO_MALDO/0.0/Polyphenol oxidase, chloroplastic OS=Malus domestica PE=2 SV=1	fve:101301080/0.0/polyphenol oxidase, chloroplastic-like; K00422 polyphenol oxidase [EC:1.10.3.1]	NA	PR00092/3.6E-17/Tyrosinase copper-binding domain signature	NA
Unigene22297_All	1068	2.53749	0.0003876	Up	gi|470125797|ref|XP_004298885.1|/1.32167e-09/PREDICTED: high mobility group B protein 6-like [Fragaria vesca subsp. vesca]	gi|470110612|ref|XR_184050.1|/1e-40/PREDICTED: Fragaria vesca subsp. vesca uncharacterized LOC101297984, transcript variant 2 (LOC101297984), misc_RNA	sp|Q9T012|HMG13_ARATH/4e-06/High mobility group B protein 13 OS=Arabidopsis thaliana GN=HMGB13 PE=2 SV=1	fve:101308964/2e-10/high mobility group B protein 6-like; K09273 upstream-binding transcription factor	NA	NA	NA
Unigene15430_All	1413	2.93487	8.13e-18	Up	gi|470124980|ref|XP_004298486.1|/0/PREDICTED: purple acid phosphatase 3-like [Fragaria vesca subsp. vesca]	gi|470124979|ref|XM_004298438.1|/0.0/PREDICTED: Fragaria vesca subsp. vesca purple acid phosphatase 3-like (LOC101298018), mRNA	sp|Q8H129|PPA3_ARATH/2e-120/Purple acid phosphatase 3 OS=Arabidopsis thaliana GN=PAP3 PE=2 SV=1	fve:101298018/0.0/purple acid phosphatase 3-like; K14379 tartrate-resistant acid phosphatase type 5 [EC:3.1.3.2]	all1686/8e-16/---	PF00149/2.2E-17/Calcineurin-like phosphoesterase	biological_process:GO:0016311//dephosphorylation;molecular_function:GO:0003993//acid phosphatase activity;
Unigene10616_All	2505	-1.29996	2.5e-07	Down	gi|470102504|ref|XP_004287693.1|/0/PREDICTED: probable L-type lectin-domain containing receptor kinase S.5 [Fragaria vesca subsp. vesca]	gi|470102503|ref|XM_004287645.1|/0.0/PREDICTED: Fragaria vesca subsp. vesca probable L-type lectin-domain containing receptor kinase S.5-like (LOC101313635), mRNA	sp|Q9FG33|LRKS5_ARATH/8e-118/Probable L-type lectin-domain containing receptor kinase S.5 OS=Arabidopsis thaliana GN=LECRKS5 PE=2 SV=1	atr:18442751/1e-159/probable L-type lectin-domain containing receptor kinase S.5; K04730 interleukin-1 receptor-associated kinase 1 [EC:2.7.11.1]	YAR019c/3e-21/---	SM00220/1.0E-37/Serine/Threonine protein kinases, catalytic domain	biological_process:GO:0006468//protein phosphorylation;cellular_component:GO:0016021//integral component of membrane;molecular_function:GO:0030246//carbohydrate binding;GO:0004674//protein serine/threonine kinase activity;GO:0005524//ATP binding;
CL9174.Contig1_All	1428	-1.11258	3.44e-08	Down	gi|764602184|ref|XP_004302868.2|/0/PREDICTED: GATA transcription factor 9-like [Fragaria vesca subsp. vesca]	gi|470134045|ref|XM_004302820.1|/0.0/PREDICTED: Fragaria vesca subsp. vesca GATA transcription factor 9-like (LOC101307314), mRNA	sp|P69781|GAT12_ARATH/3e-68/GATA transcription factor 12 OS=Arabidopsis thaliana GN=GATA12 PE=2 SV=1	aip:107619293/7e-117/GATA transcription factor 9-like; K17895 GATA-binding protein 3	SPBC28F2.12/1e-10/---	PS00344/-/GATA-type zinc finger domain.	biological_process:GO:0045893//positive regulation of transcription, DNA-templated;cellular_component:GO:0005634//nucleus;molecular_function:GO:0043565//sequence-specific DNA binding;GO:0008270//zinc ion binding;GO:0003700//transcription factor activity, sequence-specific DNA binding;
CL5420.Contig8_All	1306	1.09122	6.67e-05	Up	gi|694435362|ref|XP_009344851.1|/2.34913e-62/PREDICTED: nuclear pore complex protein Nup205-like [Pyrus x bretschneideri]	gi|470140235|ref|XM_004305799.1|/0.0/PREDICTED: Fragaria vesca subsp. vesca uncharacterized LOC101295739 (LOC101295739), mRNA	NA	pxb:103936721/4e-63/nuclear pore complex protein Nup205-like; K14310 nuclear pore complex protein Nup205	NA	PF11894/1.3E-18/Protein of unknown function (DUF3414)	NA
CL1291.Contig3_All	1733	3.15871	2.48e-30	Up	gi|470119041|ref|XP_004295626.1|/1.08665e-92/PREDICTED: linoleate 13S-lipoxygenase 3-1, chloroplastic-like [Fragaria vesca subsp. vesca]	gi|470119040|ref|XM_004295578.1|/0.0/PREDICTED: Fragaria vesca subsp. vesca linoleate 13S-lipoxygenase 3-1, chloroplastic-like (LOC101302634), mRNA	sp|O24371|LOX31_SOLTU/7e-57/Linoleate 13S-lipoxygenase 3-1, chloroplastic OS=Solanum tuberosum GN=LOX3.1 PE=1 SV=1	fve:101302634/2e-93/linoleate 13S-lipoxygenase 3-1, chloroplastic-like; K00454 lipoxygenase [EC:1.13.11.12]	NA	PTHR11771:SF38/1.1E-50/--	biological_process:GO:0044710//single-organism metabolic process;molecular_function:GO:0016491//oxidoreductase activity;
Unigene22743_All	1275	-3.03162	1.58e-23	Down	gi|764572800|ref|XP_004298191.2|/1.16952e-175/PREDICTED: lignin-forming anionic peroxidase-like [Fragaria vesca subsp. vesca]	gi|470124376|ref|XM_004298143.1|/0.0/PREDICTED: Fragaria vesca subsp. vesca lignin-forming anionic peroxidase-like (LOC101294067), mRNA	sp|Q02200|PERX_NICSY/3e-121/Lignin-forming anionic peroxidase OS=Nicotiana sylvestris PE=2 SV=1	fve:101294067/2e-176/lignin-forming anionic peroxidase-like; K00430 peroxidase [EC:1.11.1.7]	NA	PTHR31388/6.1E-175/--	NA
CL4822.Contig1_All	1154	-1.26758	2.33e-14	Down	gi|470147079|ref|XP_004309144.1|/2.3659e-124/PREDICTED: uncharacterized protein At4g00950 [Fragaria vesca subsp. vesca]	gi|470147078|ref|XM_004309096.1|/0.0/PREDICTED: Fragaria vesca subsp. vesca uncharacterized LOC101293646 (LOC101293646), mRNA	sp|Q9M160|Y4095_ARATH/1e-13/Uncharacterized protein At4g00950 OS=Arabidopsis thaliana GN=At4g00950 PE=2 SV=1	NA	NA	NA	NA
CL7851.Contig2_All	899	3.85551	3.62e-54	Up	gi|470135406|ref|XP_004303508.1|/4.04918e-89/PREDICTED: HVA22-like protein i [Fragaria vesca subsp. vesca]	gi|470135405|ref|XM_004303460.1|/0.0/PREDICTED: Fragaria vesca subsp. vesca HVA22-like protein i-like (LOC101313136), mRNA	sp|Q8LE10|HA22I_ARATH/3e-57/HVA22-like protein i OS=Arabidopsis thaliana GN=HVA22I PE=2 SV=2	fve:101313136/7e-90/HVA22-like protein i; K17338 receptor expression-enhancing protein 1/2/3/4	SPBC30D10.09c/1e-08/---	PTHR12300:SF20/2.4E-96/--	cellular_component:GO:0016020//membrane;
CL278.Contig4_All	1756	-1.06048	0.00068196	Down	gi|764512037|ref|XP_011462239.1|/0/PREDICTED: alpha-mannosidase isoform X2 [Fragaria vesca subsp. vesca]	gi|470105424|ref|XM_004289036.1|/0.0/PREDICTED: Fragaria vesca subsp. vesca lysosomal alpha-mannosidase-like (LOC101297194), mRNA	NA	fve:101297194/0.0/alpha-mannosidase; K01191 alpha-mannosidase [EC:3.2.1.24]	NA	PTHR11607:SF18/1.4E-232/--	NA
Unigene6118_All	1183	3.83754	1.01e-37	Up	gi|470132722|ref|XP_004302225.1|/1.58749e-139/PREDICTED: protein MIZU-KUSSEI 1 [Fragaria vesca subsp. vesca]	gi|470132721|ref|XM_004302177.1|/0.0/PREDICTED: Fragaria vesca subsp. vesca uncharacterized LOC101309360 (LOC101309360), mRNA	sp|O22227|MIZ1_ARATH/1e-44/Protein MIZU-KUSSEI 1 OS=Arabidopsis thaliana GN=MIZ1 PE=1 SV=1	NA	NA	PTHR31696:SF4/4.0E-122/--	NA
CL3165.Contig2_All	2202	2.1985	7.49e-05	Up	gi|470106496|ref|XP_004289607.1|/0/PREDICTED: aarF domain-containing protein kinase 4 [Fragaria vesca subsp. vesca]	gi|470106495|ref|XM_004289559.1|/0.0/PREDICTED: Fragaria vesca subsp. vesca chaperone activity of bc1 complex-like, mitochondrial-like (LOC101292067), mRNA	sp|Q9MA15|Y1796_ARATH/4e-19/Uncharacterized aarF domain-containing protein kinase At1g79600, chloroplastic OS=Arabidopsis thaliana GN=At1g79600 PE=2 SV=1	fve:101292067/0.0/aarF domain-containing protein kinase 4; K08869 aarF domain-containing kinase	SPBC2D10.18/1e-88/---	PTHR10566:SF65/2.6E-241/--	NA
CL1495.Contig2_All	829	1.34358	1.02e-21	Up	NA	NA	NA	NA	NA	NA	NA
CL6269.Contig1_All	1683	-1.20783	2.13e-08	Down	gi|764612696|ref|XP_011467716.1|/6.47764e-151/PREDICTED: uncharacterized protein LOC105349248 [Fragaria vesca subsp. vesca]	gi|470136438|ref|XM_004303953.1|/0.0/PREDICTED: Fragaria vesca subsp. vesca uncharacterized LOC101298442, transcript variant 1 (LOC101298442), mRNA	sp|Q9LK03|PERK2_ARATH/5e-15/Proline-rich receptor-like protein kinase PERK2 OS=Arabidopsis thaliana GN=PERK2 PE=2 SV=3	fve:101305378/1e-11/formin-like protein 20; K02184 formin 2	Rv3876/2e-07/---	NA	NA
CL3591.Contig2_All	2652	1.38124	4.12e-08	Up	gi|764637027|ref|XP_011470301.1|/0/PREDICTED: S-type anion channel SLAH2-like isoform X3 [Fragaria vesca subsp. vesca]	gi|470147131|ref|XM_004309122.1|/0.0/PREDICTED: Fragaria vesca subsp. vesca uncharacterized LOC101302316 (LOC101302316), mRNA	sp|Q9FLV9|SLAH3_ARATH/3e-176/S-type anion channel SLAH3 OS=Arabidopsis thaliana GN=SLAH3 PE=1 SV=1	NA	PM1587/4e-11/---	PF03595/5.2E-48/Voltage-dependent anion channel	NA
CL7048.Contig5_All	547	2.30713	0.00306192	Up	NA	gi|470113604|ref|XM_004292965.1|/0.0/PREDICTED: Fragaria vesca subsp. vesca carbon catabolite repressor protein 4 homolog 6-like (LOC101304744), mRNA	NA	NA	NA	NA	NA
CL1537.Contig11_All	1090	1.20462	0.00444401	Up	NA	gi|470135218|ref|XR_184960.1|/5e-09/PREDICTED: Fragaria vesca subsp. vesca WD repeat domain-containing protein 83-like (LOC101308890), misc_RNA	NA	NA	NA	NA	NA
CL685.Contig2_All	1376	2.81942	3.95e-05	Up	gi|470127065|ref|XP_004299499.1|/1.76727e-131/PREDICTED: N-alpha-acetyltransferase 40 isoform X2 [Fragaria vesca subsp. vesca] &gt;gi|764584953|ref|XP_011464466.1| PREDICTED: N-alpha-acetyltransferase 40 isoform X2 [Fragaria vesca subsp. vesca]	gi|470127064|ref|XM_004299451.1|/0.0/PREDICTED: Fragaria vesca subsp. vesca N-alpha-acetyltransferase 40-like (LOC101297932), mRNA	NA	NA	NA	PF00583/1.3E-10/Acetyltransferase (GNAT) family	NA
CL2964.Contig4_All	1321	-2.50455	2.51e-34	Down	gi|764522159|ref|XP_011470942.1|/4.64443e-140/PREDICTED: uncharacterized protein LOC101294893 [Fragaria vesca subsp. vesca]	gi|470105407|ref|XM_004289028.1|/0.0/PREDICTED: Fragaria vesca subsp. vesca GDSL esterase/lipase At3g14820-like (LOC101294606), mRNA	sp|Q9LH73|GDL52_ARATH/4e-89/GDSL esterase/lipase At3g14820 OS=Arabidopsis thaliana GN=At3g14820 PE=3 SV=2	aly:ARALYDRAFT_316517/4e-47/T4O12.15; K01188 beta-glucosidase [EC:3.2.1.21]	all3634/2e-16/---	PTHR22835/1.3E-137/--	NA
CL309.Contig2_All	1848	1.42733	1.02e-21	Up	gi|470133407|ref|XP_004302557.1|/0/PREDICTED: probable WRKY transcription factor 33 [Fragaria vesca subsp. vesca]	gi|470133406|ref|XM_004302509.1|/0.0/PREDICTED: Fragaria vesca subsp. vesca probable WRKY transcription factor 33-like (LOC101311683), mRNA	sp|Q8S8P5|WRK33_ARATH/1e-121/Probable WRKY transcription factor 33 OS=Arabidopsis thaliana GN=WRKY33 PE=1 SV=2	fve:101311683/0.0/probable WRKY transcription factor 33; K13424 WRKY transcription factor 33	NA	PS50811/38.859/WRKY domain profile.	biological_process:GO:0070370//cellular heat acclimation;GO:0006355//regulation of transcription, DNA-templated;GO:0009651//response to salt stress;cellular_component:GO:0005634//nucleus;molecular_function:GO:0043565//sequence-specific DNA binding;GO:0003700//transcription factor activity, sequence-specific DNA binding;
CL7001.Contig1_All	1136	2.22388	0.00429069	Up	gi|470108191|ref|XP_004290412.1|/1.19144e-104/PREDICTED: protein EXECUTER 1, chloroplastic [Fragaria vesca subsp. vesca] &gt;gi|764531586|ref|XP_011458399.1| PREDICTED: protein EXECUTER 1, chloroplastic [Fragaria vesca subsp. vesca]	gi|470108190|ref|XM_004290364.1|/0.0/PREDICTED: Fragaria vesca subsp. vesca protein EXECUTER 1, chloroplastic-like (LOC101309499), mRNA	sp|Q93YW0|EXEC1_ARATH/6e-86/Protein EXECUTER 1, chloroplastic OS=Arabidopsis thaliana GN=EX1 PE=1 SV=1	csl:COCSUDRAFT_60817/9e-22/RNB-domain-containing protein; K18681 DIS3-like exonuclease 1 [EC:3.1.13.-]	NA	PF12014/1.4E-48/Domain of unknown function (DUF3506)	NA
CL661.Contig1_All	1763	-1.47711	2.37e-34	Down	gi|470144891|ref|XP_004308080.1|/0/PREDICTED: cytokinin hydroxylase-like [Fragaria vesca subsp. vesca]	gi|470144890|ref|XM_004308032.1|/0.0/PREDICTED: Fragaria vesca subsp. vesca cytokinin hydroxylase-like (LOC101291675), mRNA	sp|Q2QYH7|C14C2_ORYSJ/4e-93/Cytochrome P450 714C2 OS=Oryza sativa subsp. japonica GN=CYP714C2 PE=2 SV=1	vra:106758094/5e-94/cytokinin hydroxylase-like; K10717 cytokinin trans-hydroxylase	AGc2890/7e-39/---	PS00086/-/Cytochrome P450 cysteine heme-iron ligand signature.	biological_process:GO:0055114//oxidation-reduction process;molecular_function:GO:0016705//oxidoreductase activity, acting on paired donors, with incorporation or reduction of molecular oxygen;GO:0020037//heme binding;GO:0005506//iron ion binding;GO:0004497//monooxygenase activity;
CL828.Contig1_All	2029	-4.17382	0	Down	gi|470107005|ref|XP_004289842.1|/0/PREDICTED: proline-rich protein 4-like isoform X1 [Fragaria vesca subsp. vesca]	gi|470107004|ref|XM_004289794.1|/0.0/PREDICTED: Fragaria vesca subsp. vesca uncharacterized LOC101304048 (LOC101304048), mRNA	sp|Q9T0I5|PRP4_ARATH/4e-100/Proline-rich protein 4 OS=Arabidopsis thaliana GN=PRP4 PE=2 SV=1	bvg:104906096/2e-47/extensin-2-like; K03006 DNA-directed RNA polymerase II subunit RPB1 [EC:2.7.7.6]	XF0818/1e-19/---	PF01190/3.1E-13/Pollen proteins Ole e I like	NA
Unigene8778_All	1546	2.21992	8.63e-05	Up	gi|764560072|ref|XP_011461137.1|/0/PREDICTED: uncharacterized protein LOC105350554 [Fragaria vesca subsp. vesca]	NA	NA	NA	NA	NA	NA
CL2722.Contig2_All	2429	-2.70018	0.000112763	Down	gi|470103477|ref|XP_004288163.1|/0/PREDICTED: protein SCAI [Fragaria vesca subsp. vesca]	gi|470103476|ref|XM_004288115.1|/0.0/PREDICTED: Fragaria vesca subsp. vesca protein SCAI-like (LOC101309965), mRNA	NA	NA	NA	PTHR21243:SF13/2.7E-190/--	biological_process:GO:0006351//transcription, DNA-templated;GO:1903507//negative regulation of nucleic acid-templated transcription;molecular_function:GO:0003714//transcription corepressor activity;
CL1640.Contig2_All	1828	-1.17284	2.66e-05	Down	gi|470139497|ref|XP_004305484.1|/3.98845e-109/PREDICTED: ethylene-responsive transcription factor ERF003-like [Fragaria vesca subsp. vesca]	gi|470139496|ref|XM_004305436.1|/0.0/PREDICTED: Fragaria vesca subsp. vesca ethylene-responsive transcription factor ERF003-like (LOC101313147), mRNA	sp|Q94AW5|ERF03_ARATH/2e-52/Ethylene-responsive transcription factor ERF003 OS=Arabidopsis thaliana GN=ERF003 PE=2 SV=1	thj:104804157/7e-20/ethylene-responsive transcription factor ERF060; K09286 EREBP-like factor	NA	PR00367/4.3E-11/Ethylene responsive element binding protein signature	biological_process:GO:0006351//transcription, DNA-templated;
CL1493.Contig4_All	1555	1.00243	0.00339922	Up	gi|645229914|ref|XP_008221684.1|/3.0313e-105/PREDICTED: protein TWIN LOV 1 [Prunus mume] &gt;gi|645229917|ref|XP_008221685.1| PREDICTED: protein TWIN LOV 1 [Prunus mume]	gi|470124906|ref|XM_004298402.1|/0.0/PREDICTED: Fragaria vesca subsp. vesca protein TWIN LOV 1-like (LOC101311188), mRNA	sp|O64511|TLOV1_ARATH/8e-78/Protein TWIN LOV 1 OS=Arabidopsis thaliana GN=TLP1 PE=1 SV=2	vvi:100262213/2e-15/phototropin-1; K08282 non-specific serine/threonine protein kinase [EC:2.7.11.1]	CC0285_1/2e-15/---	PS50112/9.041/PAS repeat profile.	NA
Unigene10665_All	1261	-1.08997	0.00111014	Down	NA	gi|470103506|ref|XR_183734.1|/1e-147/PREDICTED: Fragaria vesca subsp. vesca polyadenylate-binding protein 2-like, transcript variant 2 (LOC101313839), misc_RNA	NA	NA	NA	NA	NA
CL5561.Contig1_All	658	-1.53482	2.81e-05	Down	gi|764585175|ref|XP_011464491.1|/2.07517e-97/PREDICTED: WUSCHEL-related homeobox 1 [Fragaria vesca subsp. vesca]	gi|470130720|ref|XM_004301203.1|/0.0/PREDICTED: Fragaria vesca subsp. vesca WUSCHEL-related homeobox 1-like (LOC101293598), mRNA	NA	NA	NA	NA	NA
CL3405.Contig2_All	1645	2.18024	2.53e-13	Up	gi|470113806|ref|XP_004293111.1|/0/PREDICTED: aluminum-activated malate transporter 2 [Fragaria vesca subsp. vesca]	gi|470113805|ref|XM_004293063.1|/0.0/PREDICTED: Fragaria vesca subsp. vesca aluminum-activated malate transporter 2-like (LOC101297616), mRNA	sp|Q9SJE8|ALMT2_ARATH/5e-137/Aluminum-activated malate transporter 2 OS=Arabidopsis thaliana GN=ALMT2 PE=2 SV=2	NA	NA	PTHR31086/1.5E-215/--	biological_process:GO:0015743//malate transport;cellular_component:GO:0016021//integral component of membrane;
CL232.Contig5_All	2033	1.39458	0.0015786	Up	gi|764636648|ref|XP_011470257.1|/0/PREDICTED: cyclic nucleotide-gated ion channel 1-like [Fragaria vesca subsp. vesca]	gi|470147082|ref|XM_004309098.1|/0.0/PREDICTED: Fragaria vesca subsp. vesca cyclic nucleotide-gated ion channel 1-like (LOC101294228), mRNA	sp|O65717|CNGC1_ARATH/4e-124/Cyclic nucleotide-gated ion channel 1 OS=Arabidopsis thaliana GN=CNGC1 PE=1 SV=1	fve:101294228/0.0/cyclic nucleotide-gated ion channel 1-like; K05391 cyclic nucleotide gated channel, other eukaryote	NA	PF00027/8.1E-10/Cyclic nucleotide-binding domain	biological_process:GO:0006810//transport;
CL7008.Contig2_All	779	-1.37515	3.52e-28	Down	gi|641857023|gb|KDO75789.1|/1.13457e-08/hypothetical protein CISIN_1g041404mg [Citrus sinensis]	gi|302399216|gb|GU815849.1|/2e-47/Fragaria x ananassa clone ChFaM112 microsatellite sequence	NA	NA	NA	NA	NA
CL9556.Contig16_All	1893	2.25969	8.89e-05	Up	NA	gi|470104501|ref|XR_183809.1|/0.0/PREDICTED: Fragaria vesca subsp. vesca uncharacterized LOC101314026 (LOC101314026), misc_RNA	NA	NA	NA	NA	NA
CL3077.Contig4_All	1326	-1.43203	3.86e-16	Down	gi|470133639|ref|XP_004302673.1|/5.54241e-59/PREDICTED: uncharacterized protein LOC101295826 [Fragaria vesca subsp. vesca]	gi|470133638|ref|XM_004302625.1|/0.0/PREDICTED: Fragaria vesca subsp. vesca uncharacterized LOC101295826 (LOC101295826), mRNA	NA	NA	NA	NA	NA
CL9199.Contig3_All	1869	1.04254	0.000329266	Up	gi|470134892|ref|XP_004303270.1|/9.60332e-50/PREDICTED: COBW domain-containing protein 1 [Fragaria vesca subsp. vesca]	gi|470134891|ref|XM_004303222.1|/1e-162/PREDICTED: Fragaria vesca subsp. vesca COBW domain-containing protein 1-like (LOC101309849), mRNA	NA	NA	SMb20133/2e-19/---	PF02492/4.8E-10/CobW/HypB/UreG, nucleotide-binding domain	NA
Unigene10036_All	591	2.21888	0.00385139	Up	NA	NA	NA	NA	NA	NA	NA
Unigene11002_All	1175	1.27304	0	Up	gi|470110178|ref|XP_004291363.1|/4.83552e-56/PREDICTED: gibberellin-regulated protein 1 [Fragaria vesca subsp. vesca]	gi|470110177|ref|XM_004291315.1|/0.0/PREDICTED: Fragaria vesca subsp. vesca snakin-2-like (LOC101307658), mRNA	sp|Q93X17|SNAK2_SOLTU/1e-31/Snakin-2 OS=Solanum tuberosum GN=SN2 PE=1 SV=1	nnu:104608881/8e-10/uncharacterized LOC104608881; K03860 phosphatidylinositol glycan, class Q	NA	PTHR23201/5.7E-44/--	NA
CL5091.Contig1_All	557	-1.03741	9.86e-05	Down	gi|764523047|ref|XP_011457675.1|/1.51428e-35/PREDICTED: collagen alpha-1(XVII) chain-like [Fragaria vesca subsp. vesca]	gi|34368591|gb|AC124144.2|/2e-19/Oryza sativa Japonica Group chromosome 5 clone OSJNBb0099P06, complete sequence	NA	tcc:TCM_021134/2e-15/Serine/threonine-protein kinase isoform 1; K08819 cyclin-dependent kinase 12/13 [EC:2.7.11.22 2.7.11.23]	NA	NA	NA
CL8626.Contig2_All	918	-1.83933	8.66e-13	Down	gi|470120663|ref|XP_004296417.1|/3.63125e-103/PREDICTED: pathogenesis-related protein PR-1 [Fragaria vesca subsp. vesca]	gi|470120662|ref|XM_004296369.1|/0.0/PREDICTED: Fragaria vesca subsp. vesca pathogenesis-related protein PR-1-like (LOC101292006), mRNA	sp|Q40374|PR1_MEDTR/1e-42/Pathogenesis-related protein PR-1 OS=Medicago truncatula GN=PR-1 PE=2 SV=1	nnu:104599099/2e-81/pathogenesis-related protein PR-1-like; K20412 peptidase inhibitor 16	YJL078c_1/2e-13/---	SM00198/1.3E-46/SCP / Tpx-1 / Ag5 / PR-1 / Sc7 family of extracellular domains.	cellular_component:GO:0005576//extracellular region;
Unigene6877_All	989	3.18855	2.46e-05	Up	gi|764582586|ref|XP_011464144.1|/2.97147e-154/PREDICTED: LOW QUALITY PROTEIN: primary amine oxidase-like [Fragaria vesca subsp. vesca]	gi|470130217|ref|XR_184797.1|/0.0/PREDICTED: Fragaria vesca subsp. vesca primary amine oxidase-like (LOC101307310), misc_RNA	sp|Q43077|AMO_PEA/3e-110/Primary amine oxidase OS=Pisum sativum PE=1 SV=1	fve:101307595/5e-155/primary amine oxidase-like; K00276 primary-amine oxidase [EC:1.4.3.21]	tynA/4e-51/---	PS01164/-/Copper amine oxidase topaquinone signature.	biological_process:GO:0009308//amine metabolic process;GO:0055114//oxidation-reduction process;molecular_function:GO:0008131//primary amine oxidase activity;GO:0005507//copper ion binding;GO:0048038//quinone binding;
CL677.Contig1_All	861	2.52395	0.000825278	Up	gi|764508232|ref|XP_011458703.1|/1.73089e-88/PREDICTED: membrane-bound transcription factor site-1 protease [Fragaria vesca subsp. vesca]	gi|470104926|ref|XM_004288796.1|/0.0/PREDICTED: Fragaria vesca subsp. vesca membrane-bound transcription factor site-1 protease-like (LOC101310645), mRNA	sp|P93329|NO20_MEDTR/8e-07/Early nodulin-20 OS=Medicago truncatula GN=ENOD20 PE=3 SV=1	fve:101310645/3e-89/membrane-bound transcription factor site-1 protease; K08653 membrane-bound transcription factor site-1 protease [EC:3.4.21.112]	NA	NA	NA
CL4096.Contig1_All	265	-2.83246	3.19e-07	Down	gi|764597737|ref|XP_011466204.1|/1.57429e-32/PREDICTED: uncharacterized protein LOC101311974 isoform X4 [Fragaria vesca subsp. vesca]	gi|470132910|ref|XM_004302270.1|/5e-89/PREDICTED: Fragaria vesca subsp. vesca uncharacterized LOC101311974, transcript variant 3 (LOC101311974), mRNA	NA	NA	NA	NA	NA
CL2526.Contig6_All	906	1.10675	0.000318149	Up	gi|764580970|ref|XP_011463927.1|/8.41553e-97/PREDICTED: uncharacterized protein LOC101295341 isoform X1 [Fragaria vesca subsp. vesca]	gi|470125705|ref|XM_004298793.1|/0.0/PREDICTED: Fragaria vesca subsp. vesca uncharacterized LOC101294558 (LOC101294558), mRNA	NA	NA	NA	PTHR31852/9.9E-18/--	NA
CL387.Contig5_All	1825	-2.13067	6.66e-06	Down	gi|470117286|ref|XP_004294792.1|/0/PREDICTED: acyltransferase-like protein At1g54570, chloroplastic isoform X1 [Fragaria vesca subsp. vesca]	gi|470117285|ref|XM_004294744.1|/0.0/PREDICTED: Fragaria vesca subsp. vesca acyltransferase-like protein At1g54570, chloroplastic-like (LOC101314733), mRNA	sp|Q9LW26|Y3684_ARATH/2e-113/Acyltransferase-like protein At3g26840, chloroplastic OS=Arabidopsis thaliana GN=At3g26840 PE=2 SV=1	NA	Rv1920/4e-12/---	PTHR22753/1.3E-148/--	NA
CL7534.Contig1_All	2298	1.55035	0.000205821	Up	gi|470121804|ref|XP_004296948.1|/0/PREDICTED: adenylate isopentenyltransferase 5, chloroplastic [Fragaria vesca subsp. vesca]	gi|470121803|ref|XM_004296900.1|/0.0/PREDICTED: Fragaria vesca subsp. vesca adenylate isopentenyltransferase 5, chloroplastic-like, transcript variant 2 (LOC101292691), mRNA	sp|Q94ID2|IPT5_ARATH/4e-93/Adenylate isopentenyltransferase 5, chloroplastic OS=Arabidopsis thaliana GN=IPT5 PE=1 SV=2	fve:101292691/0.0/adenylate isopentenyltransferase 5, chloroplastic; K10760 adenylate isopentenyltransferase (cytokinin synthase)	SA1144/2e-22/---	PTHR11088:SF25/8.7E-106/--	NA
Unigene18407_All	896	4.0964	1.87e-25	Up	gi|645216120|ref|XP_008219669.1|/3.0163e-06/PREDICTED: uncharacterized protein LOC103319850 [Prunus mume]	NA	NA	NA	NA	NA	NA
CL1435.Contig24_All	1226	2.43926	0.00169504	Up	NA	gi|470142056|ref|XR_185166.1|/4e-41/PREDICTED: Fragaria vesca subsp. vesca uncharacterized LOC101309767 (LOC101309767), misc_RNA	NA	NA	NA	NA	NA
Unigene18963_All	1656	4.44279	1.72e-18	Up	gi|470124966|ref|XP_004298479.1|/0/PREDICTED: uncharacterized protein LOC101295711 [Fragaria vesca subsp. vesca]	gi|470124965|ref|XM_004298431.1|/0.0/PREDICTED: Fragaria vesca subsp. vesca uncharacterized LOC101295711 (LOC101295711), mRNA	NA	NA	NA	PTHR12242/2.0E-124/--	NA
CL4720.Contig4_All	1082	4.68009	1.4e-11	Up	gi|764550740|ref|XP_011460071.1|/1.50032e-109/PREDICTED: DNA-directed RNA polymerases IV and V subunit 4 isoform X1 [Fragaria vesca subsp. vesca] &gt;gi|764550744|ref|XP_011460072.1| PREDICTED: DNA-directed RNA polymerases IV and V subunit 4 isoform X1 [Fragaria vesca subsp. vesca]	gi|470114426|ref|XM_004293368.1|/0.0/PREDICTED: Fragaria vesca subsp. vesca uncharacterized LOC101305540 (LOC101305540), mRNA	sp|Q6DBA5|NRPD4_ARATH/2e-44/DNA-directed RNA polymerases IV and V subunit 4 OS=Arabidopsis thaliana GN=NRPD4 PE=1 SV=2	fve:101305540/3e-110/DNA-directed RNA polymerases IV and V subunit 4; K03012 DNA-directed RNA polymerase II subunit RPB4	NA	PTHR21297:SF2/2.3E-53/--	NA
Unigene18256_All	549	-1.0541	1.26e-06	Down	gi|590577752|ref|XP_007013320.1|/3.11398e-22/Uncharacterized protein TCM_037979 [Theobroma cacao] &gt;gi|508783683|gb|EOY30939.1| Uncharacterized protein TCM_037979 [Theobroma cacao]	gi|357452898|ref|XM_003596678.1|/7e-07/Medicago truncatula Defensin-like protein (MTR_2g084160) mRNA, complete cds	NA	NA	NA	NA	NA
Unigene22907_All	1177	1.54245	1.08e-24	Up	gi|470109745|ref|XP_004291151.1|/1.61511e-168/PREDICTED: serine/threonine-protein kinase Aurora-1 [Fragaria vesca subsp. vesca]	gi|470109744|ref|XM_004291103.1|/0.0/PREDICTED: Fragaria vesca subsp. vesca serine/threonine-protein kinase Aurora-1-like (LOC101293455), mRNA	sp|Q9M077|AUR1_ARATH/3e-156/Serine/threonine-protein kinase Aurora-1 OS=Arabidopsis thaliana GN=AUR1 PE=1 SV=1	fve:101293455/3e-169/serine/threonine-protein kinase Aurora-1; K08850 aurora kinase, other [EC:2.7.11.1]	ECU01g0630/4e-36/---	SM00220/1.1E-99/Serine/Threonine protein kinases, catalytic domain	biological_process:GO:0006468//protein phosphorylation;GO:0007049//cell cycle;molecular_function:GO:0004674//protein serine/threonine kinase activity;GO:0005524//ATP binding;
CL1544.Contig1_All	6204	1.20956	0.000279653	Up	gi|764532894|ref|XP_011458493.1|/0/PREDICTED: uncharacterized protein LOC101309798 isoform X6 [Fragaria vesca subsp. vesca]	gi|470112589|ref|XM_004292467.1|/0.0/PREDICTED: Fragaria vesca subsp. vesca uncharacterized LOC101309798 (LOC101309798), mRNA	NA	jcu:105631418/1e-05/midasin; K14572 midasin	NA	NA	NA
Unigene11559_All	1552	1.16302	1.68e-15	Up	gi|764574622|ref|XP_011462992.1|/1.46955e-178/PREDICTED: uncharacterized protein LOC105351132 [Fragaria vesca subsp. vesca]	gi|470122370|ref|XR_184522.1|/1e-132/PREDICTED: Fragaria vesca subsp. vesca uncharacterized LOC101304374 (LOC101304374), misc_RNA	NA	NA	NA	NA	NA
Unigene13745_All	724	1.36835	0.00109202	Up	NA	NA	NA	NA	NA	NA	NA
CL9207.Contig2_All	1847	1.7867	0.00526211	Up	gi|764512487|ref|XP_004289116.2|/0/PREDICTED: phosphatidylinositol/phosphatidylcholine transfer protein SFH12-like isoform X1 [Fragaria vesca subsp. vesca]	gi|470104839|ref|XM_004288753.1|/0.0/PREDICTED: Fragaria vesca subsp. vesca uncharacterized LOC101297004 (LOC101297004), mRNA	sp|Q94A34|SFH12_ARATH/0.0/Phosphatidylinositol/phosphatidylcholine transfer protein SFH12 OS=Arabidopsis thaliana GN=SFH12 PE=2 SV=1	apro:F751_6020/2e-53/Glutamyl-tRNA(Gln) amidotransferase subunit A; K02433 aspartyl-tRNA(Asn)/glutamyl-tRNA(Gln) amidotransferase subunit A [EC:6.3.5.6 6.3.5.7]	NA	PTHR23324:SF55/2.2E-225/--	NA
CL446.Contig1_All	2160	1.99816	1.05e-55	Up	gi|470144076|ref|XP_004307691.1|/0/PREDICTED: laccase-5-like [Fragaria vesca subsp. vesca]	gi|470144075|ref|XM_004307643.1|/0.0/PREDICTED: Fragaria vesca subsp. vesca laccase-5-like (LOC101291670), mRNA	sp|Q9SIY8|LAC5_ARATH/0.0/Laccase-5 OS=Arabidopsis thaliana GN=LAC5 PE=2 SV=1	fve:101291670/0.0/laccase-5-like; K05909 laccase [EC:1.10.3.2]	SPAC1F7.08/9e-38/---	PS00079/-/Multicopper oxidases signature 1.	biological_process:GO:0046274//lignin catabolic process;GO:0055114//oxidation-reduction process;cellular_component:GO:0048046//apoplast;molecular_function:GO:0052716//hydroquinone:oxygen oxidoreductase activity;GO:0005507//copper ion binding;
CL7123.Contig2_All	1162	-1.98497	0.000127114	Down	gi|470133499|ref|XP_004302603.1|/4.30313e-174/PREDICTED: tryptophan synthase alpha chain-like [Fragaria vesca subsp. vesca]	gi|470133498|ref|XM_004302555.1|/0.0/PREDICTED: Fragaria vesca subsp. vesca tryptophan synthase alpha chain-like (LOC101300159), mRNA	sp|O22765|TRPA1_ARATH/3e-103/Tryptophan synthase alpha chain OS=Arabidopsis thaliana GN=TRPA1 PE=1 SV=2	fve:101300159/8e-175/tryptophan synthase alpha chain-like; K01695 tryptophan synthase alpha chain [EC:4.2.1.20]	all0411/1e-70/---	PTHR10314/2.1E-86/--	biological_process:GO:0000162//tryptophan biosynthetic process;molecular_function:GO:0004834//tryptophan synthase activity;
CL8395.Contig4_All	1394	2.94318	5.71e-06	Up	gi|470144993|ref|XP_004308129.1|/0/PREDICTED: probable fructokinase-7 isoform X1 [Fragaria vesca subsp. vesca]	gi|470144992|ref|XM_004308081.1|/0.0/PREDICTED: Fragaria vesca subsp. vesca fructokinase-1-like (LOC101306470), mRNA	sp|Q0JGZ6|SCRK1_ORYSJ/5e-104/Fructokinase-1 OS=Oryza sativa subsp. japonica GN=FRK1 PE=1 SV=2	fve:101306470/0.0/probable fructokinase-7; K00847 fructokinase [EC:2.7.1.4]	BH1857/7e-52/---	PF00294/2.9E-41/pfkB family carbohydrate kinase	biological_process:GO:0046835//carbohydrate phosphorylation;GO:0006014//D-ribose metabolic process;cellular_component:GO:0005829//cytosol;molecular_function:GO:0004747//ribokinase activity;
CL5907.Contig2_All	1015	-1.15052	7.49e-07	Down	gi|470147889|ref|XP_004309510.1|/1.45311e-111/PREDICTED: heavy metal-associated isoprenylated plant protein 26 [Fragaria vesca subsp. vesca]	gi|470147888|ref|XM_004309462.1|/0.0/PREDICTED: Fragaria vesca subsp. vesca heavy metal-associated isoprenylated plant protein 26-like (LOC101295582), mRNA	sp|Q9SZN7|HIP26_ARATH/1e-14/Heavy metal-associated isoprenylated plant protein 26 OS=Arabidopsis thaliana GN=HIPP26 PE=1 SV=1	mdm:103421028/8e-13/heavy metal-associated isoprenylated plant protein 26-like; K10752 histone-binding protein RBBP4	NA	PS50846/11.963/Heavy-metal-associated domain profile.	biological_process:GO:0030001//metal ion transport;molecular_function:GO:0046872//metal ion binding;
Unigene11291_All	1847	-1.04056	1.49e-14	Down	gi|470134806|ref|XP_004303227.1|/0/PREDICTED: organic cation/carnitine transporter 4 [Fragaria vesca subsp. vesca]	gi|470134805|ref|XM_004303179.1|/0.0/PREDICTED: Fragaria vesca subsp. vesca organic cation/carnitine transporter 4-like (LOC101296978), mRNA	sp|Q9LHQ6|OCT4_ARATH/0.0/Organic cation/carnitine transporter 4 OS=Arabidopsis thaliana GN=OCT4 PE=2 SV=1	fve:101296978/0.0/organic cation/carnitine transporter 4; K08202 MFS transporter, OCT family, solute carrier family 22 (organic cation transporter), member 4/5	SMa1447/7e-29/---	PS00217/-/Sugar transport proteins signature 2.	biological_process:GO:0055085//transmembrane transport;cellular_component:GO:0009705//plant-type vacuole membrane;GO:0009535//chloroplast thylakoid membrane;GO:0016021//integral component of membrane;molecular_function:GO:0022857//transmembrane transporter activity;
CL4098.Contig8_All	1265	1.83192	1.07e-07	Up	gi|764589198|ref|XP_004300047.2|/4.7565e-159/PREDICTED: uncharacterized protein LOC101297544 isoform X2 [Fragaria vesca subsp. vesca]	gi|470128225|ref|XM_004299999.1|/0.0/PREDICTED: Fragaria vesca subsp. vesca uncharacterized LOC101297544 (LOC101297544), mRNA	NA	fve:101297544/8e-160/uncharacterized LOC101297544; K06962 uncharacterized protein	lin0274/1e-14/---	PF05991/2.4E-44/YacP-like NYN domain	NA
CL696.Contig2_All	1829	-2.1902	3.5e-07	Down	gi|470145306|ref|XP_004308282.1|/0/PREDICTED: uncharacterized protein LOC101309682 isoform X1 [Fragaria vesca subsp. vesca]	gi|470145305|ref|XM_004308234.1|/0.0/PREDICTED: Fragaria vesca subsp. vesca L-gulono-1,4-lactone dehydrogenase-like (LOC101309682), mRNA	sp|Q94AX4|DLD_ARATH/5e-11/D-lactate dehydrogenase [cytochrome], mitochondrial OS=Arabidopsis thaliana GN=DLD PE=1 SV=1	bna:106419302/5e-12/D-lactate dehydrogenase [cytochrome], mitochondrial; K00102 D-lactate dehydrogenase (cytochrome) [EC:1.1.2.4]	Rv1771/3e-14/---	PF01565/3.8E-17/FAD binding domain	biological_process:GO:0055114//oxidation-reduction process;cellular_component:GO:0016020//membrane;molecular_function:GO:0003885//D-arabinono-1,4-lactone oxidase activity;GO:0050660//flavin adenine dinucleotide binding;
CL7696.Contig3_All	3411	2.88155	7.1e-07	Up	gi|764520522|ref|XP_011469296.1|/0/PREDICTED: homeobox-leucine zipper protein HDG11-like [Fragaria vesca subsp. vesca]	gi|470106425|ref|XM_004289525.1|/0.0/PREDICTED: Fragaria vesca subsp. vesca homeobox-leucine zipper protein HDG11-like (LOC101301729), mRNA	sp|Q9FX31|HDG11_ARATH/1e-143/Homeobox-leucine zipper protein HDG11 OS=Arabidopsis thaliana GN=HDG11 PE=1 SV=1	fve:101301729/0.0/homeobox-leucine zipper protein HDG11-like; K09338 homeobox-leucine zipper protein	YDR451c/6e-07/---	PS50071/16.261/'Homeobox' domain profile.	biological_process:GO:0006355//regulation of transcription, DNA-templated;cellular_component:GO:0005634//nucleus;molecular_function:GO:0008289//lipid binding;GO:0043565//sequence-specific DNA binding;
CL1698.Contig2_All	1991	1.16767	9.96e-09	Up	gi|764592814|ref|XP_004301840.2|/0/PREDICTED: UPF0392 protein At1g27200 [Fragaria vesca subsp. vesca]	gi|470131923|ref|XM_004301792.1|/0.0/PREDICTED: Fragaria vesca subsp. vesca UPF0392 protein At1g27200-like (LOC101293011), mRNA	sp|Q94K98|Y1720_ARATH/7e-80/UPF0392 protein At1g27200 OS=Arabidopsis thaliana GN=At1g27200 PE=2 SV=2	bdi:100841250/6e-14/DNA-directed RNA polymerase II subunit 1; K03006 DNA-directed RNA polymerase II subunit RPB1 [EC:2.7.7.6]	SPBC28F2.12/3e-11/---	PTHR21461:SF10/3.7E-98/--	NA
CL7008.Contig1_All	1126	-1.00462	2.05e-35	Down	gi|629109506|gb|KCW74652.1|/2.28197e-07/hypothetical protein EUGRSUZ_E03374 [Eucalyptus grandis]	gi|302399216|gb|GU815849.1|/3e-38/Fragaria x ananassa clone ChFaM112 microsatellite sequence	NA	NA	NA	NA	NA
CL127.Contig28_All	3137	2.17104	0.00527632	Up	gi|764597276|ref|XP_011466158.1|/3.06933e-78/PREDICTED: kinesin-4-like isoform X2 [Fragaria vesca subsp. vesca]	gi|470108560|ref|XM_004290536.1|/0.0/PREDICTED: Fragaria vesca subsp. vesca kinesin-4-like (LOC101291484), mRNA	sp|O81635|ATK4_ARATH/3e-53/Kinesin-4 OS=Arabidopsis thaliana GN=ATK4 PE=1 SV=2	fve:101304022/5e-79/kinesin-4-like; K10406 kinesin family member C2/C3	SPAC664.10/6e-20/---	NA	molecular_function:GO:0000166//nucleotide binding;
Unigene15988_All	889	2.38232	1.43e-42	Up	gi|764595195|ref|XP_011465793.1|/1.96224e-66/PREDICTED: uncharacterized protein LOC105351901 [Fragaria vesca subsp. vesca]	gi|357485248|ref|XM_003612864.1|/7e-08/Medicago truncatula hypothetical protein (MTR_5g030470) mRNA, complete cds	NA	NA	NA	NA	NA
CL4207.Contig2_All	1287	-1.22004	2.32e-08	Down	gi|764529918|ref|XP_011458245.1|/8.48774e-166/PREDICTED: probable carboxylesterase 18 [Fragaria vesca subsp. vesca]	gi|470111556|ref|XM_004291965.1|/1e-143/PREDICTED: Fragaria vesca subsp. vesca probable carboxylesterase 18-like (LOC101292478), mRNA	sp|Q9LT10|CXE18_ARATH/5e-107/Probable carboxylesterase 18 OS=Arabidopsis thaliana GN=CXE18 PE=1 SV=1	ppp:PHYPADRAFT_118478/1e-72/GLP1; GLP1 GID1-like protein; K14493 gibberellin receptor GID1 [EC:3.-.-.-]	SSO2521/2e-21/---	PTHR23024/5.7E-153/--	biological_process:GO:0008152//metabolic process;molecular_function:GO:0052689//carboxylic ester hydrolase activity;
CL2277.Contig3_All	2146	1.16765	0.00530211	Up	gi|764637130|ref|XP_011470307.1|/0/PREDICTED: DNA-directed primase/polymerase protein isoform X1 [Fragaria vesca subsp. vesca]	gi|470147144|ref|XM_004309128.1|/0.0/PREDICTED: Fragaria vesca subsp. vesca coiled-coil domain-containing protein 111 homolog (LOC101304341), mRNA	NA	NA	NA	PTHR31399:SF0/1.7E-140/--	biological_process:GO:0006269//DNA replication, synthesis of RNA primer;molecular_function:GO:0003896//DNA primase activity;
Unigene20330_All	1177	-1.32618	2.77e-14	Down	gi|470132092|ref|XP_004301920.1|/1.02582e-122/PREDICTED: uncharacterized protein LOC101299013 [Fragaria vesca subsp. vesca]	gi|470132091|ref|XM_004301872.1|/0.0/PREDICTED: Fragaria vesca subsp. vesca uncharacterized LOC101299013 (LOC101299013), mRNA	NA	NA	NA	NA	NA
CL5931.Contig1_All	2083	3.69977	4.77e-07	Up	gi|764570472|ref|XP_011462554.1|/0/PREDICTED: fanconi-associated nuclease 1 homolog [Fragaria vesca subsp. vesca]	gi|470124038|ref|XM_004297977.1|/0.0/PREDICTED: Fragaria vesca subsp. vesca fanconi-associated nuclease 1 homolog (LOC101301001), mRNA	sp|Q5XVJ4|FAN1_ARATH/5e-137/Fanconi-associated nuclease 1 homolog OS=Arabidopsis thaliana GN=At1g48360 PE=2 SV=2	fve:101301001/0.0/fanconi-associated nuclease 1 homolog; K15363 fanconi-associated nuclease 1 [EC:3.1.21.- 3.1.4.1]	NA	PTHR32043/6.9E-109/--	NA
Unigene8305_All	3598	-1.90717	1.03e-100	Down	gi|470111668|ref|XP_004292067.1|/0/PREDICTED: receptor-like protein kinase HAIKU2 [Fragaria vesca subsp. vesca]	gi|470111667|ref|XM_004292019.1|/0.0/PREDICTED: Fragaria vesca subsp. vesca receptor-like protein kinase HAIKU2-like (LOC101312802), mRNA	sp|Q9LJM4|IKU2_ARATH/0.0/Receptor-like protein kinase HAIKU2 OS=Arabidopsis thaliana GN=IKU2 PE=1 SV=1	tcc:TCM_029800/0.0/HAESA-like 1 isoform 1; K00924	alr0124_1/3e-35/---	SM00220/3.3E-33/Serine/Threonine protein kinases, catalytic domain	biological_process:GO:0006468//protein phosphorylation;cellular_component:GO:0016021//integral component of membrane;molecular_function:GO:0004674//protein serine/threonine kinase activity;GO:0005524//ATP binding;
CL740.Contig1_All	1783	-1.98707	1.99e-128	Down	gi|470108123|ref|XP_004290381.1|/0/PREDICTED: pollen-specific leucine-rich repeat extensin-like protein 3 [Fragaria vesca subsp. vesca]	gi|470108122|ref|XM_004290333.1|/0.0/PREDICTED: Fragaria vesca subsp. vesca pollen-specific leucine-rich repeat extensin-like protein 4-like (LOC101298958), mRNA	sp|Q9XIL9|PLRX3_ARATH/0.0/Pollen-specific leucine-rich repeat extensin-like protein 3 OS=Arabidopsis thaliana GN=PEX3 PE=2 SV=1	aip:107619883/5e-52/formin-like protein 20; K02184 formin 2	YDL140c/2e-26/---	PR01217/2.62E-16/Proline rich extensin signature	NA
CL4728.Contig1_All	2227	1.82022	0.000497365	Up	gi|764615703|ref|XP_011467998.1|/0/PREDICTED: aspartic proteinase-like protein 2, partial [Fragaria vesca subsp. vesca]	gi|470140881|ref|XM_004306117.1|/0.0/PREDICTED: Fragaria vesca subsp. vesca aspartic proteinase-like protein 2-like (LOC101306553), mRNA	sp|Q9S9K4|ASPL2_ARATH/1e-75/Aspartic proteinase-like protein 2 OS=Arabidopsis thaliana GN=At1g65240 PE=1 SV=2	tcc:TCM_041550/2e-156/Eukaryotic aspartyl protease family protein isoform 1; K00924	NA	PF14541/1.4E-25/Xylanase inhibitor C-terminal	biological_process:GO:0006508//proteolysis;cellular_component:GO:0016021//integral component of membrane;molecular_function:GO:0004190//aspartic-type endopeptidase activity;
CL3302.Contig3_All	2621	1.02937	0.00371186	Up	gi|470148811|ref|XP_004309942.1|/0/PREDICTED: E3 ubiquitin-protein ligase XBAT32 [Fragaria vesca subsp. vesca] &gt;gi|764644593|ref|XP_011457384.1| PREDICTED: E3 ubiquitin-protein ligase XBAT32 [Fragaria vesca subsp. vesca]	gi|470148810|ref|XM_004309894.1|/0.0/PREDICTED: Fragaria vesca subsp. vesca E3 ubiquitin-protein ligase XBAT32-like (LOC101311066), mRNA	sp|Q6NLQ8|XB32_ARATH/0.0/E3 ubiquitin-protein ligase XBAT32 OS=Arabidopsis thaliana GN=XBAT32 PE=1 SV=1	fve:101311066/0.0/E3 ubiquitin-protein ligase XBAT32; K19044 E3 ubiquitin-protein ligase XBAT32/33 [EC:2.3.2.27]	all2748/3e-19/---	PS50088/12.689/Ankyrin repeat profile.	biological_process:GO:0006511//ubiquitin-dependent protein catabolic process;GO:0010311//lateral root formation;GO:0051865//protein autoubiquitination;GO:0010366//negative regulation of ethylene biosynthetic process;molecular_function:GO:0008270//zinc ion binding;GO:0004842//ubiquitin-protein transferase activity;
Unigene15447_All	1172	1.92843	2.29e-05	Up	gi|764630119|ref|XP_011469507.1|/0/PREDICTED: cinnamoyl-CoA reductase 1-like [Fragaria vesca subsp. vesca]	gi|470146139|ref|XM_004308639.1|/0.0/PREDICTED: Fragaria vesca subsp. vesca uncharacterized LOC101310561 (LOC101310561), mRNA	sp|Q9S9N9|CCR1_ARATH/7e-73/Cinnamoyl-CoA reductase 1 OS=Arabidopsis thaliana GN=CCR1 PE=1 SV=1	egu:105050729/2e-74/cinnamoyl-CoA reductase 1-like; K09753 cinnamoyl-CoA reductase [EC:1.2.1.44]	SPAC513.07/8e-35/---	PF01370/3.0E-22/NAD dependent epimerase/dehydratase family	biological_process:GO:0006694//steroid biosynthetic process;GO:0055114//oxidation-reduction process;molecular_function:GO:0003854//3-beta-hydroxy-delta5-steroid dehydrogenase activity;
CL9241.Contig1_All	1571	-1.7443	1.02e-46	Down	gi|470148120|ref|XP_004309620.1|/2.24619e-150/PREDICTED: aquaporin NIP1-1-like [Fragaria vesca subsp. vesca]	gi|470148119|ref|XM_004309572.1|/0.0/PREDICTED: Fragaria vesca subsp. vesca aquaporin NIP1-2-like (LOC101306876), mRNA	sp|Q40746|NIP11_ORYSJ/2e-100/Aquaporin NIP1-1 OS=Oryza sativa subsp. japonica GN=NIP1-1 PE=2 SV=1	fve:101306876/4e-151/aquaporin NIP1-1-like; K09874 aquaporin NIP	aqpZ/4e-33/---	PF00230/2.6E-63/Major intrinsic protein	biological_process:GO:0006810//transport;cellular_component:GO:0016021//integral component of membrane;molecular_function:GO:0005215//transporter activity;
CL2706.Contig1_All	1614	1.14799	0.00179563	Up	gi|470130761|ref|XP_004301271.1|/2.0677e-98/PREDICTED: probable protein phosphatase 2C 8 [Fragaria vesca subsp. vesca]	gi|470130760|ref|XM_004301223.1|/0.0/PREDICTED: Fragaria vesca subsp. vesca probable protein phosphatase 2C 8-like (LOC101299681), mRNA	sp|Q9LMT1|P2C08_ARATH/1e-56/Probable protein phosphatase 2C 8 OS=Arabidopsis thaliana GN=At1g18030 PE=2 SV=2	fve:101299681/4e-99/probable protein phosphatase 2C 8; K17500 integrin-linked kinase-associated serine/threonine phosphatase 2C [EC:3.1.3.16]	SPCC1223.11/2e-09/---	PTHR13832:SF221/6.8E-34/--	NA
Unigene16043_All	695	-2.19358	7.23e-56	Down	gi|764605209|ref|XP_004303178.2|/2.24713e-84/PREDICTED: subtilisin-like protease SBT5.3 [Fragaria vesca subsp. vesca]	gi|470134701|ref|XM_004303130.1|/0.0/PREDICTED: Fragaria vesca subsp. vesca uncharacterized LOC101305959 (LOC101305959), mRNA	NA	NA	NA	PF05922/4.1E-14/Peptidase inhibitor I9	NA
CL9207.Contig1_All	2084	2.00264	1.23e-12	Up	gi|764512487|ref|XP_004289116.2|/0/PREDICTED: phosphatidylinositol/phosphatidylcholine transfer protein SFH12-like isoform X1 [Fragaria vesca subsp. vesca]	gi|470105488|ref|XM_004289068.1|/0.0/PREDICTED: Fragaria vesca subsp. vesca uncharacterized LOC101306761 (LOC101306761), mRNA	sp|Q94A34|SFH12_ARATH/2e-178/Phosphatidylinositol/phosphatidylcholine transfer protein SFH12 OS=Arabidopsis thaliana GN=SFH12 PE=2 SV=1	apro:F751_6020/1e-55/Glutamyl-tRNA(Gln) amidotransferase subunit A; K02433 aspartyl-tRNA(Asn)/glutamyl-tRNA(Gln) amidotransferase subunit A [EC:6.3.5.6 6.3.5.7]	NA	PF00650/9.0E-34/CRAL/TRIO domain	cellular_component:GO:0016020//membrane;
CL8084.Contig2_All	1253	-3.44718	8.19e-07	Down	gi|764518048|ref|XP_011467245.1|/0/PREDICTED: probable protein S-acyltransferase 4 isoform X2 [Fragaria vesca subsp. vesca]	gi|470106158|ref|XM_004289394.1|/0.0/PREDICTED: Fragaria vesca subsp. vesca probable S-acyltransferase At3g56930-like (LOC101302502), mRNA	sp|Q9M1K5|ZDH13_ARATH/1e-120/Probable protein S-acyltransferase 4 OS=Arabidopsis thaliana GN=PAT04 PE=2 SV=1	fve:101302502/0.0/probable protein S-acyltransferase 4; K16675 palmitoyltransferase ZDHHC9/14/18 [EC:2.3.1.225]	YLR246w/4e-25/---	PF01529/4.3E-40/DHHC palmitoyltransferase	cellular_component:GO:0016021//integral component of membrane;GO:0005886//plasma membrane;molecular_function:GO:0008270//zinc ion binding;GO:0019706//protein-cysteine S-palmitoyltransferase activity;
CL7779.Contig2_All	874	5.15447	1.02e-14	Up	gi|764549967|ref|XP_011460009.1|/4.36633e-79/PREDICTED: stigma-specific STIG1-like protein 1 [Fragaria vesca subsp. vesca]	gi|470111889|ref|XM_004292126.1|/0.0/PREDICTED: Fragaria vesca subsp. vesca uncharacterized LOC101309702 (LOC101309702), mRNA	NA	NA	NA	PF04885/6.4E-38/Stigma-specific protein, Stig1	NA
Unigene6000_All	1173	3.66019	9.05e-37	Up	gi|657962912|ref|XP_008373057.1|/2.30297e-82/PREDICTED: uncharacterized protein LOC103436409 [Malus domestica]	NA	NA	NA	NA	PTHR31852:SF2/1.3E-13/--	cellular_component:GO:0016020//membrane;
CL8200.Contig2_All	841	1.75699	0.00444685	Up	gi|470129818|ref|XP_004300805.1|/2.337e-20/PREDICTED: zinc finger protein CONSTANS-LIKE 1-like [Fragaria vesca subsp. vesca]	gi|470103616|ref|XR_183740.1|/0.0/PREDICTED: Fragaria vesca subsp. vesca uncharacterized LOC101305696 (LOC101305696), misc_RNA	NA	NA	NA	NA	NA
Unigene17865_All	1521	1.22463	2.13e-10	Up	gi|764549206|ref|XP_011459923.1|/5.19243e-120/PREDICTED: peroxiredoxin-2E-1, chloroplastic-like [Fragaria vesca subsp. vesca]	gi|470111268|ref|XR_184110.1|/0.0/PREDICTED: Fragaria vesca subsp. vesca uncharacterized LOC101297509 (LOC101297509), misc_RNA	sp|Q69TY4|PR2E1_ORYSJ/1e-28/Peroxiredoxin-2E-1, chloroplastic OS=Oryza sativa subsp. japonica GN=PRXIIE-1 PE=2 SV=1	ath:AT1G60740/3e-20/peroxiredoxin-2D; K03386 peroxiredoxin (alkyl hydroperoxide reductase subunit C) [EC:1.11.1.15]	CC3394/2e-15/---	PTHR10430/1.4E-35/--	NA
Unigene13685_All	910	-1.90764	4.99e-13	Down	gi|470126828|ref|XP_004299384.1|/3.51344e-42/PREDICTED: transcription factor PRE3 [Fragaria vesca subsp. vesca]	gi|470126827|ref|XM_004299336.1|/0.0/PREDICTED: Fragaria vesca subsp. vesca transcription factor bHLH135-like (LOC101312348), mRNA	sp|Q9CA64|PRE3_ARATH/9e-36/Transcription factor PRE3 OS=Arabidopsis thaliana GN=PRE3 PE=1 SV=1	NA	NA	PF00010/2.7E-7/Helix-loop-helix DNA-binding domain	molecular_function:GO:0046983//protein dimerization activity;
CL1336.Contig3_All	2119	1.00724	2.62e-05	Up	gi|764596579|ref|XP_011466067.1|/0/PREDICTED: uncharacterized protein LOC101307034 [Fragaria vesca subsp. vesca]	gi|470138132|ref|XM_004304765.1|/0.0/PREDICTED: Fragaria vesca subsp. vesca uncharacterized LOC101307034 (LOC101307034), mRNA	NA	mdm:103420349/3e-17/eukaryotic translation initiation factor 3 subunit C-like; K03252 translation initiation factor 3 subunit C	NA	PTHR31210/1.4E-170/--	NA
CL1419.Contig2_All	3739	-1.1121	2.76e-05	Down	gi|470122093|ref|XP_004297084.1|/0/PREDICTED: squamosa promoter-binding-like protein 12 [Fragaria vesca subsp. vesca]	gi|470122092|ref|XM_004297036.1|/0.0/PREDICTED: Fragaria vesca subsp. vesca squamosa promoter-binding-like protein 12-like (LOC101312143), mRNA	sp|Q9S7P5|SPL12_ARATH/0.0/Squamosa promoter-binding-like protein 12 OS=Arabidopsis thaliana GN=SPL12 PE=1 SV=1	mdm:103401427/3e-16/uncharacterized LOC103401427; K13415 protein brassinosteroid insensitive 1 [EC:2.7.10.1 2.7.11.1]	NA	PTHR31251/0.0/--	cellular_component:GO:0005634//nucleus;GO:0016021//integral component of membrane;molecular_function:GO:0003677//DNA binding;
CL1389.Contig4_All	1246	1.49757	0.000165874	Up	gi|470107756|ref|XP_004290208.1|/1.35715e-104/PREDICTED: phosphatidylinositol/phosphatidylcholine transfer protein SFH9 isoform X2 [Fragaria vesca subsp. vesca]	gi|470107755|ref|XM_004290160.1|/0.0/PREDICTED: Fragaria vesca subsp. vesca uncharacterized LOC101294029 (LOC101294029), mRNA	sp|F4J7S8|SFH9_ARATH/4e-32/Phosphatidylinositol/phosphatidylcholine transfer protein SFH9 OS=Arabidopsis thaliana GN=SFH9 PE=2 SV=1	NA	NA	NA	NA
CL2184.Contig3_All	1634	1.38102	1.29e-13	Up	gi|764553229|ref|XP_011460382.1|/5.38717e-150/PREDICTED: protein SRG1-like [Fragaria vesca subsp. vesca]	gi|470118606|ref|XR_184358.1|/0.0/PREDICTED: Fragaria vesca subsp. vesca uncharacterized LOC101299458 (LOC101299458), misc_RNA	sp|Q39224|SRG1_ARATH/5e-88/Protein SRG1 OS=Arabidopsis thaliana GN=SRG1 PE=2 SV=1	gmx:100810937/7e-42/flavonol synthase/flavanone 3-hydroxylase-like; K05278 flavonol synthase [EC:1.14.11.23]	PA0147/8e-20/---	PF14226/4.6E-13/non-haem dioxygenase in morphine synthesis N-terminal	biological_process:GO:0055114//oxidation-reduction process;molecular_function:GO:0046872//metal ion binding;GO:0016491//oxidoreductase activity;
CL261.Contig6_All	1217	-2.1814	0.00503515	Down	gi|470135584|ref|XP_004303593.1|/0/PREDICTED: putative alpha-xylosidase 2 [Fragaria vesca subsp. vesca] &gt;gi|764608709|ref|XP_011467316.1| PREDICTED: putative alpha-xylosidase 2 [Fragaria vesca subsp. vesca]	gi|470135583|ref|XM_004303545.1|/0.0/PREDICTED: Fragaria vesca subsp. vesca alpha-glucosidase YihQ-like (LOC101291737), mRNA	NA	vvi:100248748/1e-10/probable glucan 1,3-alpha-glucosidase; K05546 alpha 1,3-glucosidase [EC:3.2.1.84]	ZyihQ/2e-63/---	PTHR22762/2.0E-146/--	biological_process:GO:0005975//carbohydrate metabolic process;molecular_function:GO:0004553//hydrolase activity, hydrolyzing O-glycosyl compounds;GO:0030246//carbohydrate binding;
CL1969.Contig7_All	2997	3.94127	5.25e-08	Up	gi|470103341|ref|XP_004288098.1|/8.19351e-97/PREDICTED: tRNA(His) guanylyltransferase 1-like [Fragaria vesca subsp. vesca]	gi|470103340|ref|XM_004288050.1|/0.0/PREDICTED: Fragaria vesca subsp. vesca tRNA(His) guanylyltransferase 1-like (LOC101314791), mRNA	sp|F4IRQ5|THG1_ARATH/4e-71/tRNA(His) guanylyltransferase 1 OS=Arabidopsis thaliana GN=THG1 PE=1 SV=1	fve:101314791/1e-97/tRNA(His) guanylyltransferase 1-like; K10761 tRNA(His) guanylyltransferase [EC:2.7.7.79]	SPCC63.07/1e-39/---	PF04446/1.9E-39/tRNAHis guanylyltransferase	biological_process:GO:0006400//tRNA modification;molecular_function:GO:0000287//magnesium ion binding;GO:0008193//tRNA guanylyltransferase activity;
Unigene16173_All	2028	3.40314	2.11e-18	Up	gi|764585764|ref|XP_011464561.1|/0/PREDICTED: LOW QUALITY PROTEIN: protein NRT1/ PTR FAMILY 2.10-like [Fragaria vesca subsp. vesca]	gi|470127291|ref|XR_184661.1|/0.0/PREDICTED: Fragaria vesca subsp. vesca probable peptide/nitrate transporter At5g62680-like (LOC101306428), misc_RNA	sp|Q944G5|PTR44_ARATH/0.0/Protein NRT1/ PTR FAMILY 2.10 OS=Arabidopsis thaliana GN=NPF2.10 PE=1 SV=3	pmum:103338243/0.0/protein NRT1/ PTR FAMILY 2.11-like; K14638 solute carrier family 15 (peptide/histidine transporter), member 3/4	ECU11g1050/7e-21/---	PTHR11654:SF59/0.0/--	biological_process:GO:0006810//transport;cellular_component:GO:0016021//integral component of membrane;molecular_function:GO:0005215//transporter activity;
Unigene10485_All	1027	-1.15072	2.55e-16	Down	gi|567913873|ref|XP_006449250.1|/2.86853e-06/hypothetical protein CICLE_v10017282mg [Citrus clementina] &gt;gi|557551861|gb|ESR62490.1| hypothetical protein CICLE_v10017282mg [Citrus clementina]	NA	NA	NA	NA	NA	NA
Unigene21297_All	1230	3.19103	4.67e-07	Up	gi|764560106|ref|XP_004295879.2|/0/PREDICTED: cytochrome P450 71A25-like [Fragaria vesca subsp. vesca]	gi|470119556|ref|XM_004295831.1|/0.0/PREDICTED: Fragaria vesca subsp. vesca cytochrome P450 71A25-like (LOC101298501), mRNA	sp|P37117|C71A4_SOLME/2e-105/Cytochrome P450 71A4 OS=Solanum melongena GN=CYP71A4 PE=2 SV=1	mdm:103428276/2e-127/cytochrome P450 71A3-like; K00512 steroid 17alpha-monooxygenase / 17alpha-hydroxyprogesterone aldolase [EC:1.14.14.19 4.1.2.30]	BH0579/7e-26/---	PS00086/-/Cytochrome P450 cysteine heme-iron ligand signature.	NA
CL4883.Contig4_All	1258	-1.17219	7.91e-164	Down	gi|470123550|ref|XP_004297786.1|/4.09474e-40/PREDICTED: defensin Ec-AMP-D2-like [Fragaria vesca subsp. vesca]	gi|470123549|ref|XM_004297738.1|/0.0/PREDICTED: Fragaria vesca subsp. vesca defensin-like protein 2-like (LOC101306423), mRNA	sp|Q39182|DEF02_ARATH/2e-25/Defensin-like protein 2 OS=Arabidopsis thaliana GN=PDF2.2 PE=2 SV=1	NA	NA	NA	biological_process:GO:0050832//defense response to fungus;GO:0031640//killing of cells of other organism;
[truncated: 1,454 more rows]
