# Supplementary material for: Combined transcriptomic and proteomic analysis reveals multiple pathways involved in self-pollen tube development and the potential roles of FviYABBY1 in self-incompatibility in Fragaria viridis
Source: Front Plant Sci. 2022 Sep 14;13:927001. doi: 10.3389/fpls.2022.927001 (PMC9515988; doi:10.3389/fpls.2022.927001)
Supplement: Supplementary file 4 [file Table_4.XLSX]

## Sheet: Table S4
Supplementary Table S4. KEGG pathways of DEGs.
KEGG Pathway	DEGs with pathway annotation (1571)	Pathway ID	Genes
Starch and sucrose metabolism	106 (6.75%)	ko00500	Unigene3711_All, CL4292.Contig1_All, Unigene3875_All, Unigene6306_All, Unigene20498_All, CL1093.Contig2_All, Unigene15035_All, CL724.Contig2_All, Unigene13366_All, CL3038.Contig3_All, Unigene13029_All, Unigene3549_All, Unigene18907_All, CL3038.Contig2_All, CL8764.Contig3_All, CL4344.Contig1_All, Unigene4769_All, CL6435.Contig2_All, CL2231.Contig4_All, Unigene23235_All, Unigene20275_All, CL2323.Co…
Pentose and glucuronate interconversions	50 (3.18%)	ko00040	CL4292.Contig1_All, Unigene6306_All, Unigene20498_All, CL1093.Contig2_All, CL724.Contig2_All, Unigene13366_All, CL3038.Contig3_All, Unigene11298_All, CL3038.Contig2_All, CL4344.Contig1_All, CL2231.Contig4_All, Unigene23235_All, CL808.Contig5_All, Unigene7173_All, CL4179.Contig2_All, Unigene10668_All, CL4292.Contig6_All, CL4292.Contig7_All, Unigene9134_All, Unigene20517_All, Unigene14199_All, Unig…
Phenylpropanoid biosynthesis	67 (4.26%)	ko00940	CL831.Contig1_All, Unigene4921_All, Unigene8572_All, CL6279.Contig1_All, CL4352.Contig4_All, CL1314.Contig4_All, CL1232.Contig4_All, Unigene3549_All, Unigene18907_All, CL6008.Contig3_All, Unigene4769_All, CL6435.Contig2_All, CL1072.Contig2_All, CL4352.Contig3_All, Unigene1298_All, CL2964.Contig3_All, CL6026.Contig2_All, CL1001.Contig2_All, CL3703.Contig2_All, CL4277.Contig2_All, Unigene9237_All, …
alpha-Linolenic acid metabolism	18 (1.15%)	ko00592	Unigene8839_All, CL1251.Contig3_All, Unigene12127_All, Unigene9412_All, CL3886.Contig1_All, CL1291.Contig3_All, Unigene13917_All, Unigene8321_All, Unigene13893_All, CL4218.Contig1_All, Unigene15132_All, Unigene21051_All, CL1291.Contig4_All, Unigene301_All, Unigene36300_All, CL3195.Contig2_All, CL1263.Contig1_All, CL5476.Contig1_All
Metabolic pathways	409 (26.03%)	ko01100	Unigene3711_All, CL4292.Contig1_All, CL831.Contig1_All, Unigene13412_All, Unigene4921_All, CL8433.Contig1_All, Unigene8572_All, Unigene20508_All, Unigene6306_All, CL7112.Contig1_All, CL6279.Contig1_All, Unigene20498_All, CL8261.Contig2_All, CL4352.Contig4_All, Unigene6955_All, CL1093.Contig2_All, CL1314.Contig4_All, CL2196.Contig1_All, CL3425.Contig2_All, Unigene15035_All, CL27.Contig1_All, CL218…
Biosynthesis of secondary metabolites	238 (15.15%)	ko01110	Unigene4489_All, CL831.Contig1_All, Unigene13412_All, Unigene4921_All, CL8433.Contig1_All, Unigene8572_All, Unigene20508_All, CL7112.Contig1_All, CL6279.Contig1_All, CL7491.Contig3_All, CL8261.Contig2_All, CL4352.Contig4_All, Unigene6955_All, CL1093.Contig2_All, CL1314.Contig4_All, Unigene15035_All, CL2184.Contig2_All, Unigene13142_All, CL1923.Contig4_All, Unigene8839_All, Unigene29108_All, Unige…
Porphyrin and chlorophyll metabolism	21 (1.34%)	ko00860	CL1093.Contig2_All, Unigene18907_All, CL4344.Contig1_All, CL6435.Contig2_All, CL2964.Contig3_All, CL3703.Contig2_All, CL2964.Contig4_All, Unigene22751_All, Unigene21143_All, Unigene4309_All, CL8138.Contig1_All, CL3139.Contig1_All, Unigene8930_All, CL8138.Contig2_All, CL1801.Contig4_All, CL746.Contig2_All, CL2964.Contig2_All, Unigene16339_All, Unigene21820_All, CL6865.Contig3_All, Unigene6098_All
Cutin, suberine and wax biosynthesis	15 (0.95%)	ko00073	Unigene20311_All, Unigene10656_All, Unigene20246_All, Unigene23614_All, CL1001.Contig2_All, CL8999.Contig1_All, CL1001.Contig1_All, CL5656.Contig1_All, CL1001.Contig3_All, CL8999.Contig2_All, CL861.Contig2_All, CL3877.Contig2_All, CL3877.Contig1_All, Unigene18612_All, Unigene10807_All
Isoflavonoid biosynthesis	10 (0.64%)	ko00943	CL1288.Contig1_All, CL5252.Contig2_All, Unigene13965_All, CL5252.Contig1_All, Unigene10601_All, Unigene20312_All, CL2482.Contig3_All, Unigene11735_All, Unigene11736_All, Unigene6952_All
Zeatin biosynthesis	16 (1.02%)	ko00908	CL3037.Contig1_All, CL6515.Contig1_All, CL938.Contig1_All, CL661.Contig1_All, CL7534.Contig1_All, CL661.Contig6_All, CL661.Contig5_All, CL1801.Contig4_All, CL2353.Contig8_All, Unigene12998_All, CL661.Contig2_All, CL4680.Contig2_All, CL2353.Contig1_All, Unigene5919_All, Unigene22553_All, CL661.Contig4_All
Cyanoamino acid metabolism	30 (1.91%)	ko00460	Unigene4489_All, CL1093.Contig2_All, Unigene3549_All, Unigene18907_All, Unigene13147_All, CL4344.Contig1_All, Unigene4769_All, CL6435.Contig2_All, CL2964.Contig3_All, CL3703.Contig2_All, Unigene9237_All, CL2964.Contig4_All, Unigene22751_All, Unigene23384_All, Unigene21143_All, Unigene4309_All, CL8138.Contig1_All, CL3139.Contig1_All, Unigene8930_All, CL8138.Contig2_All, CL1801.Contig4_All, CL2964.…
Isoquinoline alkaloid biosynthesis	16 (1.02%)	ko00950	CL1172.Contig2_All, CL3678.Contig1_All, Unigene14277_All, Unigene10402_All, Unigene20945_All, Unigene6877_All, CL1771.Contig11_All, CL6592.Contig1_All, CL7602.Contig4_All, CL5461.Contig3_All, CL501.Contig1_All, CL4558.Contig2_All, Unigene15357_All, CL7602.Contig2_All, CL501.Contig2_All, CL1771.Contig26_All
Terpenoid backbone biosynthesis	21 (1.34%)	ko00900	Unigene18907_All, CL3711.Contig9_All, CL6435.Contig2_All, CL4394.Contig1_All, CL2964.Contig3_All, CL3703.Contig2_All, CL2964.Contig4_All, Unigene22751_All, CL5306.Contig1_All, Unigene21143_All, Unigene23671_All, CL3711.Contig13_All, CL8138.Contig1_All, Unigene8930_All, CL8138.Contig2_All, CL2964.Contig2_All, Unigene16339_All, Unigene21820_All, CL2148.Contig2_All, CL5331.Contig4_All, Unigene6098_A…
Ascorbate and aldarate metabolism	23 (1.46%)	ko00053	CL1093.Contig2_All, Unigene22627_All, CL4344.Contig1_All, Unigene26560_All, CL1656.Contig2_All, Unigene9069_All, CL696.Contig2_All, CL2689.Contig2_All, CL1262.Contig1_All, Unigene4309_All, CL268.Contig3_All, CL3139.Contig1_All, CL1801.Contig4_All, CL2689.Contig3_All, Unigene4327_All, CL1262.Contig3_All, CL7656.Contig2_All, CL3189.Contig1_All, CL1014.Contig5_All, CL5857.Contig2_All, Unigene6813_Al…
Inositol phosphate metabolism	21 (1.34%)	ko00562	Unigene20508_All, Unigene6955_All, Unigene22627_All, CL4411.Contig2_All, Unigene26560_All, CL1656.Contig2_All, Unigene11757_All, Unigene9069_All, Unigene1692_All, Unigene12903_All, CL6587.Contig2_All, Unigene13174_All, Unigene4327_All, CL8281.Contig2_All, CL3021.Contig5_All, CL1014.Contig5_All, Unigene6813_All, Unigene20883_All, CL8281.Contig1_All, Unigene806_All, CL6559.Contig2_All
ABC transporters	26 (1.65%)	ko02010	CL8431.Contig1_All, Unigene5838_All, CL953.Contig12_All, CL9001.Contig5_All, CL9413.Contig1_All, CL953.Contig9_All, CL6807.Contig2_All, CL2828.Contig2_All, CL8629.Contig2_All, CL4787.Contig1_All, Unigene9503_All, Unigene2792_All, CL7012.Contig3_All, CL6653.Contig2_All, CL953.Contig11_All, Unigene13266_All, CL953.Contig2_All, CL2954.Contig2_All, Unigene13395_All, Unigene7629_All, Unigene157_All, U…
Tyrosine metabolism	18 (1.15%)	ko00350	Unigene8839_All, CL1172.Contig2_All, CL3678.Contig1_All, Unigene14277_All, Unigene10402_All, Unigene20945_All, Unigene6877_All, CL1771.Contig11_All, CL6592.Contig1_All, CL7602.Contig4_All, CL5461.Contig3_All, CL501.Contig1_All, CL4558.Contig2_All, Unigene15357_All, CL7602.Contig2_All, CL501.Contig2_All, CL1771.Contig26_All, Unigene20217_All
Flavonoid biosynthesis	19 (1.21%)	ko00941	CL7112.Contig1_All, CL2184.Contig2_All, CL1923.Contig4_All, CL8618.Contig1_All, CL7598.Contig2_All, CL1001.Contig2_All, Unigene5684_All, CL2184.Contig3_All, CL1001.Contig1_All, CL8995.Contig2_All, CL2184.Contig1_All, CL7288.Contig1_All, Unigene12137_All, CL4061.Contig1_All, Unigene1429_All, CL7222.Contig1_All, CL582.Contig1_All, CL3418.Contig1_All, CL7598.Contig1_All
Circadian rhythm - plant	21 (1.34%)	ko04712	CL5958.Contig1_All, Unigene10688_All, CL5958.Contig2_All, Unigene11610_All, Unigene5765_All, CL3992.Contig3_All, CL8995.Contig2_All, Unigene7278_All, CL3828.Contig3_All, CL3992.Contig5_All, Unigene16273_All, CL3828.Contig1_All, Unigene20752_All, Unigene6005_All, CL3469.Contig7_All, CL7107.Contig1_All, Unigene17830_All, Unigene13209_All, CL2003.Contig1_All, CL9244.Contig2_All, CL8922.Contig1_All
Benzoxazinoid biosynthesis	5 (0.32%)	ko00402	CL8413.Contig1_All, CL8413.Contig2_All, Unigene14270_All, Unigene23412_All, CL5038.Contig1_All
Glycerolipid metabolism	29 (1.85%)	ko00561	CL3425.Contig2_All, Unigene18907_All, CL2104.Contig5_All, CL6270.Contig4_All, Unigene21120_All, CL6435.Contig2_All, Unigene7211_All, CL5411.Contig2_All, CL808.Contig5_All, Unigene10492_All, Unigene9127_All, CL2964.Contig3_All, CL3703.Contig2_All, CL2964.Contig4_All, Unigene22751_All, Unigene21143_All, CL8138.Contig1_All, Unigene8930_All, CL8138.Contig2_All, CL5878.Contig1_All, CL2964.Contig2_All,…
Glucosinolate biosynthesis	6 (0.38%)	ko00966	Unigene13147_All, CL1238.Contig6_All, CL1238.Contig3_All, CL1607.Contig3_All, CL1607.Contig2_All, CL7037.Contig1_All
Glutathione metabolism	19 (1.21%)	ko00480	CL5574.Contig3_All, CL798.Contig1_All, CL5574.Contig2_All, CL6476.Contig2_All, Unigene9237_All, CL5914.Contig2_All, CL5914.Contig3_All, CL268.Contig3_All, Unigene9169_All, Unigene20396_All, CL5574.Contig4_All, CL6898.Contig1_All, Unigene13503_All, CL353.Contig1_All, CL9226.Contig1_All, CL5914.Contig1_All, CL268.Contig1_All, CL499.Contig1_All, CL2428.Contig2_All
Linoleic acid metabolism	6 (0.38%)	ko00591	CL1104.Contig1_All, CL4487.Contig2_All, CL3886.Contig1_All, CL1291.Contig3_All, CL1291.Contig4_All, CL1263.Contig1_All
Stilbenoid, diarylheptanoid and gingerol biosynthesis	10 (0.64%)	ko00945	Unigene13142_All, CL1288.Contig1_All, CL1001.Contig2_All, Unigene20075_All, CL682.Contig2_All, CL1001.Contig1_All, CL7082.Contig2_All, CL4061.Contig1_All, CL2482.Contig3_All, Unigene6952_All
Biosynthesis of unsaturated fatty acids	6 (0.38%)	ko01040	CL4208.Contig2_All, Unigene1314_All, Unigene16282_All, Unigene13893_All, Unigene21133_All, CL4208.Contig1_All
Sesquiterpenoid and triterpenoid biosynthesis	6 (0.38%)	ko00909	CL8261.Contig2_All, Unigene10825_All, CL720.Contig3_All, Unigene6180_All, Unigene21468_All, CL8261.Contig1_All
Fructose and mannose metabolism	16 (1.02%)	ko00051	Unigene3711_All, Unigene20508_All, CL7212.Contig1_All, Unigene6955_All, CL1711.Contig1_All, CL808.Contig5_All, Unigene20275_All, CL8395.Contig4_All, CL1711.Contig3_All, Unigene4442_All, CL1711.Contig2_All, CL4324.Contig3_All, CL5390.Contig1_All, CL1711.Contig4_All, CL1345.Contig1_All, CL7212.Contig2_All
Other glycan degradation	15 (0.95%)	ko00511	Unigene18907_All, CL6435.Contig2_All, Unigene3741_All, CL3703.Contig2_All, CL278.Contig4_All, Unigene22751_All, CL6593.Contig1_All, Unigene21143_All, Unigene8930_All, CL8138.Contig2_All, Unigene16339_All, CL755.Contig3_All, Unigene21820_All, CL278.Contig2_All, Unigene6098_All
Plant hormone signal transduction	56 (3.56%)	ko04075	Unigene6034_All, CL1813.Contig1_All, CL3921.Contig1_All, Unigene29108_All, Unigene15946_All, CL1726.Contig3_All, Unigene10688_All, Unigene10422_All, CL1211.Contig2_All, Unigene6277_All, CL869.Contig1_All, CL7260.Contig1_All, CL2101.Contig1_All, Unigene11759_All, CL8195.Contig1_All, CL4207.Contig2_All, CL1419.Contig2_All, Unigene18350_All, CL620.Contig1_All, CL3992.Contig3_All, Unigene10426_All, U…
Tropane, piperidine and pyridine alkaloid biosynthesis	11 (0.7%)	ko00960	CL1172.Contig2_All, CL5036.Contig3_All, Unigene10402_All, Unigene6877_All, CL1771.Contig11_All, CL5461.Contig3_All, CL501.Contig1_All, CL4558.Contig2_All, Unigene15357_All, CL501.Contig2_All, CL1771.Contig26_All
Indole alkaloid biosynthesis	2 (0.13%)	ko00901	CL6748.Contig1_All, Unigene8018_All
Glycosylphosphatidylinositol(GPI)-anchor biosynthesis	10 (0.64%)	ko00563	Unigene8572_All, Unigene10302_All, Unigene17512_All, Unigene11002_All, Unigene6453_All, CL9066.Contig1_All, CL389.Contig2_All, CL1354.Contig26_All, CL5630.Contig3_All, CL1354.Contig19_All
Synthesis and degradation of ketone bodies	2 (0.13%)	ko00072	CL2196.Contig1_All, CL2196.Contig2_All
beta-Alanine metabolism	11 (0.7%)	ko00410	CL1172.Contig2_All, Unigene10402_All, Unigene6877_All, CL240.Contig7_All, CL5461.Contig3_All, CL501.Contig1_All, CL4558.Contig2_All, Unigene15357_All, CL501.Contig2_All, CL3021.Contig5_All, CL6816.Contig2_All
Limonene and pinene degradation	6 (0.38%)	ko00903	Unigene13142_All, CL1288.Contig1_All, Unigene20075_All, CL682.Contig2_All, CL7082.Contig2_All, CL2482.Contig3_All
Carotenoid biosynthesis	11 (0.7%)	ko00906	CL5479.Contig3_All, CL8781.Contig3_All, CL1887.Contig4_All, CL8781.Contig4_All, Unigene8085_All, CL7124.Contig3_All, CL8781.Contig1_All, Unigene20078_All, CL8781.Contig2_All, CL5577.Contig1_All, CL5479.Contig2_All
Taurine and hypotaurine metabolism	2 (0.13%)	ko00430	Unigene9237_All, Unigene16882_All
Tryptophan metabolism	9 (0.57%)	ko00380	CL4487.Contig2_All, CL3905.Contig11_All, CL1771.Contig11_All, Unigene9306_All, Unigene6313_All, CL3803.Contig5_All, Unigene8347_All, CL1947.Contig3_All, CL3803.Contig2_All
Phenylalanine metabolism	12 (0.76%)	ko00360	CL1172.Contig2_All, Unigene10402_All, CL6026.Contig2_All, Unigene6877_All, CL1771.Contig11_All, CL5461.Contig3_All, CL501.Contig1_All, CL4558.Contig2_All, Unigene15357_All, CL4061.Contig1_All, CL501.Contig2_All, CL1771.Contig26_All
SNARE interactions in vesicular transport	4 (0.25%)	ko04130	CL8286.Contig2_All, CL5786.Contig1_All, Unigene493_All, Unigene17961_All
Amino sugar and nucleotide sugar metabolism	26 (1.65%)	ko00520	Unigene3711_All, Unigene15035_All, Unigene20275_All, CL2323.Contig7_All, CL8395.Contig4_All, Unigene21289_All, CL2717.Contig4_All, Unigene4169_All, Unigene6108_All, CL2323.Contig8_All, Unigene3654_All, CL5150.Contig2_All, CL3561.Contig3_All, CL6357.Contig1_All, Unigene18111_All, Unigene14004_All, Unigene15895_All, Unigene13856_All, Unigene4654_All, CL7936.Contig1_All, CL5672.Contig5_All, Unigene6…
Caffeine metabolism	1 (0.06%)	ko00232	CL4487.Contig2_All
Anthocyanin biosynthesis	3 (0.19%)	ko00942	Unigene22715_All, CL607.Contig2_All, Unigene20312_All
Carbon fixation in photosynthetic organisms	14 (0.89%)	ko00710	Unigene20508_All, Unigene6955_All, CL1711.Contig1_All, CL707.Contig6_All, CL1711.Contig3_All, CL6625.Contig1_All, Unigene4442_All, CL1711.Contig2_All, CL707.Contig2_All, Unigene13395_All, CL8375.Contig2_All, CL1711.Contig4_All, CL1345.Contig1_All, CL1503.Contig6_All
Flavone and flavonol biosynthesis	4 (0.25%)	ko00944	Unigene12998_All, Unigene10601_All, Unigene11735_All, Unigene11736_All
Glycerophospholipid metabolism	24 (1.53%)	ko00564	CL2104.Contig5_All, CL6270.Contig4_All, Unigene313_All, Unigene7211_All, Unigene10492_All, CL3144.Contig1_All, Unigene9412_All, CL3886.Contig1_All, Unigene8321_All, CL5878.Contig1_All, Unigene13174_All, Unigene21016_All, CL9478.Contig2_All, CL8291.Contig1_All, CL5711.Contig2_All, CL7875.Contig2_All, CL7569.Contig1_All, Unigene20883_All, CL7252.Contig2_All, Unigene22580_All, CL3938.Contig5_All, CL…
Aminoacyl-tRNA biosynthesis	21 (1.34%)	ko00970	CL1037.Contig5_All, CL5624.Contig1_All, CL9207.Contig2_All, CL9207.Contig1_All, CL5198.Contig3_All, CL2346.Contig5_All, CL9420.Contig28_All, CL7753.Contig2_All, Unigene24577_All, Unigene13698_All, CL2346.Contig10_All, CL606.Contig15_All, CL2346.Contig2_All, Unigene10723_All, CL4611.Contig3_All, CL7753.Contig1_All, Unigene15239_All, CL8840.Contig2_All, Unigene21274_All, Unigene20017_All, Unigene10…
Brassinosteroid biosynthesis	3 (0.19%)	ko00905	Unigene15411_All, Unigene24391_All, Unigene3688_All
Endocytosis	56 (3.56%)	ko04144	Unigene20508_All, CL453.Contig9_All, Unigene6955_All, CL3048.Contig2_All, CL7138.Contig1_All, Unigene8372_All, Unigene49_All, Unigene22359_All, Unigene21245_All, CL8382.Contig1_All, CL1072.Contig2_All, Unigene3889_All, CL3048.Contig1_All, CL2456.Contig1_All, Unigene22657_All, Unigene47_All, Unigene23359_All, Unigene1937_All, Unigene18245_All, Unigene17751_All, CL604.Contig4_All, CL1592.Contig1_Al…
Nitrogen metabolism	5 (0.32%)	ko00910	Unigene15085_All, Unigene17974_All, Unigene8032_All, CL6060.Contig1_All, CL2143.Contig2_All
Fatty acid elongation	4 (0.25%)	ko00062	CL4208.Contig2_All, Unigene13258_All, Unigene14017_All, CL4208.Contig1_All
Valine, leucine and isoleucine degradation	8 (0.51%)	ko00280	CL2196.Contig1_All, CL1238.Contig6_All, CL1238.Contig3_All, Unigene13893_All, CL1607.Contig3_All, CL1607.Contig2_All, CL3021.Contig5_All, CL2196.Contig2_All
Glycine, serine and threonine metabolism	12 (0.76%)	ko00260	CL1172.Contig2_All, CL5555.Contig5_All, Unigene9127_All, Unigene10402_All, Unigene6877_All, CL7123.Contig2_All, CL5461.Contig3_All, CL501.Contig1_All, CL4558.Contig2_All, Unigene15357_All, CL501.Contig2_All, CL4611.Contig3_All
Cysteine and methionine metabolism	14 (0.89%)	ko00270	CL8433.Contig1_All, CL6476.Contig2_All, Unigene13543_All, CL1238.Contig6_All, CL1238.Contig3_All, CL6282.Contig2_All, CL1607.Contig3_All, Unigene13395_All, CL1607.Contig2_All, CL9153.Contig1_All, CL4611.Contig3_All, Unigene16137_All, CL9044.Contig2_All, Unigene653_All
Phenylalanine, tyrosine and tryptophan biosynthesis	7 (0.45%)	ko00400	Unigene8045_All, CL7123.Contig2_All, CL1771.Contig11_All, CL5482.Contig1_All, CL8793.Contig3_All, CL1771.Contig26_All, CL5482.Contig2_All
Phosphatidylinositol signaling system	13 (0.83%)	ko04070	CL4411.Contig2_All, CL1656.Contig2_All, Unigene11757_All, Unigene7211_All, Unigene1692_All, Unigene12903_All, CL6587.Contig2_All, Unigene8619_All, CL5656.Contig1_All, CL8281.Contig2_All, CL8281.Contig1_All, Unigene806_All, CL6559.Contig2_All
Folate biosynthesis	3 (0.19%)	ko00790	CL2251.Contig15_All, Unigene18424_All, CL2251.Contig3_All
Base excision repair	9 (0.57%)	ko03410	Unigene24431_All, Unigene22785_All, CL8826.Contig2_All, Unigene10723_All, CL2521.Contig3_All, CL2521.Contig1_All, CL4612.Contig1_All, CL2063.Contig2_All, CL2233.Contig4_All
Plant-pathogen interaction	72 (4.58%)	ko04626	Unigene20508_All, CL6584.Contig2_All, CL349.Contig5_All, Unigene6955_All, CL8767.Contig2_All, CL3921.Contig1_All, CL5493.Contig3_All, CL6160.Contig1_All, Unigene18004_All, CL456.Contig1_All, CL4614.Contig2_All, Unigene15946_All, CL3623.Contig3_All, Unigene14015_All, Unigene10422_All, Unigene5598_All, Unigene8127_All, CL8257.Contig1_All, Unigene15602_All, Unigene5835_All, CL8767.Contig3_All, Unige…
Nicotinate and nicotinamide metabolism	4 (0.25%)	ko00760	CL6759.Contig1_All, CL6759.Contig2_All, Unigene529_All, Unigene14201_All
Mismatch repair	11 (0.7%)	ko03430	CL5092.Contig14_All, CL8608.Contig1_All, CL4225.Contig5_All, Unigene24431_All, CL97.Contig9_All, CL977.Contig3_All, CL94.Contig3_All, CL8269.Contig2_All, CL2521.Contig3_All, CL1497.Contig4_All, CL2521.Contig1_All
Selenocompound metabolism	3 (0.19%)	ko00450	CL1771.Contig11_All, Unigene16137_All, CL8840.Contig2_All
Arachidonic acid metabolism	4 (0.25%)	ko00590	CL3886.Contig1_All, Unigene9237_All, CL3232.Contig4_All, CL6865.Contig3_All
Galactose metabolism	12 (0.76%)	ko00052	Unigene22653_All, CL3843.Contig5_All, CL808.Contig5_All, CL3843.Contig6_All, Unigene13914_All, CL6593.Contig1_All, CL3843.Contig4_All, CL3843.Contig2_All, Unigene4798_All, CL755.Contig3_All, CL7936.Contig1_All, CL3843.Contig7_All
Valine, leucine and isoleucine biosynthesis	4 (0.25%)	ko00290	CL1238.Contig6_All, CL1238.Contig3_All, CL1607.Contig3_All, CL1607.Contig2_All
Regulation of autophagy	7 (0.45%)	ko04140	CL7239.Contig4_All, CL5796.Contig3_All, Unigene3417_All, Unigene20359_All, Unigene20202_All, CL3763.Contig2_All, Unigene10622_All
Monoterpenoid biosynthesis	2 (0.13%)	ko00902	CL9191.Contig2_All, CL5331.Contig4_All
Monobactam biosynthesis	1 (0.06%)	ko00261	CL4611.Contig3_All
Pentose phosphate pathway	8 (0.51%)	ko00030	CL1711.Contig1_All, CL707.Contig6_All, CL1711.Contig3_All, Unigene4442_All, CL1711.Contig2_All, CL707.Contig2_All, CL1711.Contig4_All, CL1345.Contig1_All
Proteasome	4 (0.25%)	ko03050	CL7138.Contig1_All, CL9070.Contig2_All, Unigene18379_All, CL3404.Contig2_All
Ether lipid metabolism	10 (0.64%)	ko00565	Unigene11602_All, CL3886.Contig1_All, CL4282.Contig4_All, Unigene13174_All, CL8291.Contig1_All, CL4680.Contig2_All, CL6248.Contig1_All, Unigene20883_All, Unigene22580_All, CL1947.Contig3_All
Arginine and proline metabolism	7 (0.45%)	ko00330	CL1455.Contig3_All, CL240.Contig7_All, CL6282.Contig2_All, Unigene10601_All, Unigene11735_All, CL6816.Contig2_All, Unigene11736_All
Fatty acid metabolism	7 (0.45%)	ko01212	CL4208.Contig2_All, Unigene1314_All, Unigene16282_All, Unigene13893_All, Unigene18943_All, Unigene21133_All, CL4208.Contig1_All
Sulfur relay system	1 (0.06%)	ko04122	CL4219.Contig6_All
DNA replication	12 (0.76%)	ko03030	CL5092.Contig14_All, CL8608.Contig1_All, CL4225.Contig5_All, Unigene24431_All, CL977.Contig3_All, CL1777.Contig1_All, CL94.Contig3_All, CL8269.Contig2_All, CL2521.Contig3_All, CL1691.Contig1_All, CL1497.Contig4_All, CL2521.Contig1_All
Peroxisome	13 (0.83%)	ko04146	CL2196.Contig1_All, Unigene14467_All, Unigene1314_All, Unigene17865_All, CL2717.Contig4_All, Unigene13893_All, CL5656.Contig1_All, CL3095.Contig3_All, CL269.Contig3_All, Unigene26553_All, CL6865.Contig3_All, CL2196.Contig2_All, Unigene12924_All
Photosynthesis	5 (0.32%)	ko00195	CL1367.Contig1_All, CL334.Contig2_All, Unigene6758_All, Unigene12908_All, Unigene6101_All
Lysine biosynthesis	1 (0.06%)	ko00300	CL4611.Contig3_All
Sphingolipid metabolism	6 (0.38%)	ko00600	Unigene16376_All, Unigene9237_All, CL6593.Contig1_All, Unigene3584_All, CL4680.Contig2_All, CL755.Contig3_All
Other types of O-glycan biosynthesis	1 (0.06%)	ko00514	Unigene17870_All
Diterpenoid biosynthesis	4 (0.25%)	ko00904	CL7491.Contig3_All, Unigene5522_All, CL7288.Contig1_All, CL582.Contig1_All
Pyruvate metabolism	7 (0.45%)	ko00620	CL4302.Contig4_All, CL6515.Contig1_All, Unigene8372_All, CL696.Contig2_All, Unigene13395_All, CL831.Contig2_All, CL1503.Contig6_All
Butanoate metabolism	2 (0.13%)	ko00650	CL2196.Contig1_All, CL2196.Contig2_All
Pantothenate and CoA biosynthesis	4 (0.25%)	ko00770	CL1238.Contig6_All, CL1238.Contig3_All, CL1607.Contig3_All, CL1607.Contig2_All
Glycosphingolipid biosynthesis - ganglio series	2 (0.13%)	ko00604	CL6593.Contig1_All, CL755.Contig3_All
2-Oxocarboxylic acid metabolism	10 (0.64%)	ko01210	Unigene13412_All, Unigene13147_All, CL1238.Contig6_All, CL1238.Contig3_All, CL1607.Contig3_All, CL1607.Contig2_All, CL4611.Contig3_All, CL7037.Contig1_All, Unigene20769_All, CL2109.Contig3_All
Vitamin B6 metabolism	1 (0.06%)	ko00750	CL8842.Contig3_All
Nucleotide excision repair	13 (0.83%)	ko03420	CL5092.Contig14_All, CL8608.Contig1_All, CL4225.Contig5_All, Unigene24431_All, CL977.Contig3_All, CL94.Contig3_All, CL7512.Contig1_All, CL8269.Contig2_All, CL2231.Contig2_All, CL2521.Contig3_All, CL1497.Contig4_All, CL2348.Contig8_All, CL2521.Contig1_All
Glycosaminoglycan degradation	3 (0.19%)	ko00531	CL6593.Contig1_All, Unigene18034_All, CL755.Contig3_All
Fatty acid degradation	3 (0.19%)	ko00071	Unigene8839_All, Unigene13893_All, Unigene20217_All
N-Glycan biosynthesis	5 (0.32%)	ko00510	CL27.Contig1_All, CL261.Contig6_All, CL4150.Contig4_All, Unigene13842_All, CL4150.Contig1_All
Biotin metabolism	1 (0.06%)	ko00780	CL3481.Contig1_All
Riboflavin metabolism	1 (0.06%)	ko00740	CL2226.Contig1_All
Citrate cycle (TCA cycle)	4 (0.25%)	ko00020	Unigene13412_All, Unigene13395_All, Unigene20769_All, CL1503.Contig6_All
Sulfur metabolism	3 (0.19%)	ko00920	CL3982.Contig9_All, CL3982.Contig2_All, CL9044.Contig2_All
Photosynthesis - antenna proteins	1 (0.06%)	ko00196	Unigene17992_All
Histidine metabolism	1 (0.06%)	ko00340	CL1656.Contig2_All
Glycolysis / Gluconeogenesis	12 (0.76%)	ko00010	Unigene20508_All, Unigene6955_All, Unigene8839_All, CL1711.Contig1_All, Unigene13234_All, CL1711.Contig3_All, Unigene4442_All, CL1711.Contig2_All, Unigene20217_All, CL1711.Contig4_All, CL1345.Contig1_All, CL1503.Contig6_All
Phagosome	8 (0.51%)	ko04145	CL8834.Contig2_All, CL8286.Contig2_All, CL5786.Contig1_All, Unigene17918_All, CL8834.Contig1_All, CL9123.Contig8_All, CL654.Contig2_All, Unigene4591_All
mRNA surveillance pathway	24 (1.53%)	ko03015	CL1800.Contig1_All, Unigene10991_All, CL3425.Contig2_All, CL920.Contig1_All, CL6270.Contig4_All, Unigene21120_All, Unigene3889_All, CL159.Contig3_All, CL282.Contig1_All, Unigene9127_All, CL9470.Contig1_All, Unigene6043_All, Unigene20095_All, Unigene16738_All, CL6808.Contig3_All, Unigene7957_All, CL7512.Contig1_All, CL9174.Contig2_All, CL7360.Contig1_All, Unigene10730_All, CL4611.Contig3_All, CL37…
Ribosome biogenesis in eukaryotes	8 (0.51%)	ko03008	CL1544.Contig1_All, Unigene20177_All, CL1499.Contig4_All, CL3173.Contig1_All, Unigene16273_All, CL590.Contig1_All, Unigene6005_All, CL5762.Contig1_All
AGE-RAGE signaling pathway in diabetic complications	5 (0.32%)	ko04933	Unigene29108_All, CL8195.Contig1_All, CL6587.Contig2_All, Unigene416_All, CL6559.Contig2_All
Oxidative phosphorylation	9 (0.57%)	ko00190	Unigene15187_All, Unigene15186_All, Unigene19991_All, Unigene157_All, Unigene16047_All, Unigene12908_All, CL1531.Contig3_All, Unigene2832_All, Unigene22652_All
RNA polymerase	13 (0.83%)	ko03020	CL8411.Contig4_All, CL4277.Contig2_All, Unigene2792_All, CL828.Contig1_All, CL4720.Contig4_All, CL1698.Contig2_All, CL5306.Contig1_All, Unigene23671_All, CL612.Contig4_All, CL3660.Contig5_All, Unigene10823_All, CL828.Contig3_All, Unigene6800_All
Glyoxylate and dicarboxylate metabolism	7 (0.45%)	ko00630	Unigene13412_All, CL5555.Contig5_All, Unigene9127_All, Unigene13395_All, CL269.Contig3_All, Unigene26553_All, Unigene20769_All
Fatty acid biosynthesis	2 (0.13%)	ko00061	Unigene16282_All, Unigene18943_All
Lysine degradation	3 (0.19%)	ko00310	Unigene4580_All, CL3293.Contig3_All, CL8734.Contig1_All
Biosynthesis of amino acids	30 (1.91%)	ko01230	Unigene13412_All, Unigene20508_All, Unigene6955_All, Unigene29108_All, CL1711.Contig1_All, Unigene8045_All, CL1656.Contig2_All, CL5555.Contig5_All, CL1455.Contig3_All, CL707.Contig6_All, CL7123.Contig2_All, CL1771.Contig11_All, CL1711.Contig3_All, CL1238.Contig6_All, CL1238.Contig3_All, CL5482.Contig1_All, Unigene4442_All, CL1711.Contig2_All, CL8793.Contig3_All, CL707.Contig2_All, CL1607.Contig3_…
Propanoate metabolism	1 (0.06%)	ko00640	CL3021.Contig5_All
RNA transport	38 (2.42%)	ko03013	CL3425.Contig2_All, Unigene29108_All, CL5279.Contig1_All, CL5420.Contig4_All, CL6270.Contig4_All, CL2881.Contig2_All, Unigene21120_All, Unigene22670_All, Unigene9127_All, Unigene17751_All, Unigene837_All, Unigene11803_All, CL8195.Contig1_All, CL562.Contig1_All, CL5420.Contig8_All, CL1336.Contig3_All, CL3582.Contig2_All, CL6887.Contig2_All, Unigene13164_All, CL6887.Contig1_All, CL6808.Contig3_All,…
Protein export	3 (0.19%)	ko03060	CL8834.Contig2_All, CL8834.Contig1_All, CL8624.Contig2_All
Ubiquinone and other terpenoid-quinone biosynthesis	3 (0.19%)	ko00130	CL2313.Contig6_All, CL6026.Contig2_All, CL162.Contig5_All
Homologous recombination	6 (0.38%)	ko03440	CL5092.Contig14_All, CL8608.Contig1_All, Unigene15791_All, CL977.Contig3_All, CL8269.Contig2_All, CL1497.Contig4_All
RNA degradation	15 (0.95%)	ko03018	CL1447.Contig7_All, CL3425.Contig2_All, Unigene19847_All, Unigene21120_All, Unigene9127_All, CL7001.Contig1_All, CL896.Contig12_All, CL1447.Contig10_All, Unigene9375_All, CL896.Contig7_All, Unigene10730_All, CL1691.Contig1_All, CL4268.Contig1_All, CL3425.Contig1_All, CL1447.Contig6_All
Basal transcription factors	3 (0.19%)	ko03022	CL6895.Contig2_All, CL4654.Contig1_All, CL2348.Contig8_All
Ribosome	23 (1.46%)	ko03010	CL1077.Contig1_All, CL5201.Contig4_All, Unigene473_All, Unigene15477_All, Unigene1314_All, CL740.Contig1_All, CL5306.Contig1_All, Unigene23671_All, Unigene20065_All, Unigene18495_All, CL5821.Contig3_All, CL435.Contig3_All, CL3976.Contig2_All, Unigene16595_All, CL3521.Contig3_All, CL3254.Contig2_All, CL730.Contig4_All, Unigene416_All, CL740.Contig3_All, Unigene22628_All, Unigene15239_All, CL5201.C…
Protein processing in endoplasmic reticulum	29 (1.85%)	ko04141	CL453.Contig9_All, CL8119.Contig2_All, CL8834.Contig2_All, Unigene22657_All, Unigene1937_All, Unigene12198_All, CL5899.Contig2_All, CL677.Contig1_All, CL261.Contig6_All, Unigene1689_All, Unigene14270_All, CL5417.Contig7_All, CL4852.Contig2_All, Unigene3797_All, CL4852.Contig1_All, Unigene13395_All, CL7512.Contig1_All, CL1773.Contig9_All, CL8269.Contig2_All, Unigene23217_All, CL2479.Contig2_All, U…
Pyrimidine metabolism	19 (1.21%)	ko00240	CL8411.Contig4_All, CL930.Contig1_All, CL4277.Contig2_All, Unigene2792_All, CL828.Contig1_All, CL4720.Contig4_All, CL1698.Contig2_All, Unigene529_All, CL5306.Contig1_All, Unigene23671_All, CL612.Contig4_All, CL2310.Contig1_All, CL3660.Contig5_All, Unigene14201_All, Unigene10823_All, CL4917.Contig3_All, CL828.Contig3_All, CL2310.Contig2_All, Unigene6800_All
Alanine, aspartate and glutamate metabolism	1 (0.06%)	ko00250	Unigene29108_All
Arginine biosynthesis	2 (0.13%)	ko00220	Unigene29108_All, CL2109.Contig3_All
Carbon metabolism	21 (1.34%)	ko01200	Unigene13412_All, Unigene20508_All, Unigene6955_All, CL1711.Contig1_All, CL5555.Contig5_All, CL707.Contig6_All, CL1711.Contig3_All, CL6625.Contig1_All, Unigene4442_All, CL1711.Contig2_All, CL707.Contig2_All, Unigene13395_All, CL8375.Contig2_All, CL3021.Contig5_All, CL269.Contig3_All, Unigene26553_All, Unigene20769_All, CL1711.Contig4_All, CL1345.Contig1_All, CL1503.Contig6_All, CL9044.Contig2_All
Spliceosome	30 (1.91%)	ko03040	CL453.Contig9_All, Unigene4580_All, CL4031.Contig3_All, Unigene29108_All, CL6270.Contig4_All, Unigene24590_All, CL387.Contig6_All, Unigene22657_All, CL3458.Contig4_All, Unigene1937_All, CL1791.Contig2_All, CL1569.Contig6_All, CL3925.Contig6_All, CL487.Contig2_All, CL4166.Contig2_All, CL6834.Contig2_All, CL6834.Contig4_All, Unigene13420_All, CL8281.Contig2_All, CL2041.Contig1_All, Unigene5613_All,…
Purine metabolism	17 (1.08%)	ko00230	CL8411.Contig4_All, CL4277.Contig2_All, Unigene2792_All, CL828.Contig1_All, CL4720.Contig4_All, CL1698.Contig2_All, CL5306.Contig1_All, Unigene23671_All, CL612.Contig4_All, CL3660.Contig5_All, Unigene10823_All, CL6292.Contig2_All, CL1081.Contig5_All, CL828.Contig3_All, CL2902.Contig3_All, Unigene6800_All, CL1081.Contig9_All
Ubiquitin mediated proteolysis	7 (0.45%)	ko04120	CL4343.Contig4_All, Unigene1669_All, Unigene11602_All, Unigene5765_All, CL4282.Contig4_All, Unigene3797_All, CL6248.Contig1_All
