# Supplementary material for: Combined transcriptomic and proteomic analysis reveals multiple pathways involved in self-pollen tube development and the potential roles of FviYABBY1 in self-incompatibility in Fragaria viridis
Source: Front Plant Sci. 2022 Sep 14;13:927001. doi: 10.3389/fpls.2022.927001 (PMC9515988; doi:10.3389/fpls.2022.927001)
Supplement: Supplementary file 5 [file Table_5.XLSX]

## Sheet: Table S5
Supplementary Table S5. DAPs between pistils harvest at 0 and 24 HAP.
Protein accession	Protein coverage(%)	FC	Up/Down-regulation	Identity	p-value	GeneBank blast annotation
						Accession	Description
CL4892_Contig1_All	0.432	1.55	UP	98.64	0.0002675	gi|470115880|ref|XP_004294119.1|	PREDICTED: epidermis-specific secreted glycoprotein EP1-like [Fragaria vesca subsp. vesca]
Unigene11253_All	0.105	2.15	UP	-	0.01025	-	-
CL7816_Contig4_All	0.258	1.6	UP	97.46	0.01283	gi|470111121|ref|XP_004291800.1|	PREDICTED: ADP,ATP carrier protein, mitochondrial-like [Fragaria vesca subsp. vesca]
CL2509_Contig1_All	0.205	1.66	UP	88.72	0.001347	gi|470133092|ref|XP_004302408.1|	PREDICTED: EG45-like domain containing protein-like [Fragaria vesca subsp. vesca]
Unigene16355_All	0.254	1.72	UP	100	0.001406	gi|470137428|ref|XP_004304467.1|	PREDICTED: S-adenosylmethionine synthase 2-like [Fragaria vesca subsp. vesca]
Unigene1000_All	0.178	1.7	UP	99.34	0.0001345	gi|470122708|ref|XP_004297381.1|	PREDICTED: MLP-like protein 28-like [Fragaria vesca subsp. vesca]
Unigene34598_All	0.132	3.25	UP	82.23	0.003219	gi|470132001|ref|XP_004301876.1|	PREDICTED: STS14 protein-like [Fragaria vesca subsp. vesca]
Unigene20258_All	0.066	2.01	UP	99.27	0.0001449	gi|470118457|ref|XP_004295347.1|	PREDICTED: polygalacturonase-like [Fragaria vesca subsp. vesca]
CL8445_Contig1_All	0.297	1.84	UP	100	0.03258	gi|470128266|ref|XP_004300067.1|	PREDICTED: uncharacterized protein At2g27730, mitochondrial-like [Fragaria vesca subsp. vesca]
CL4292_Contig1_All	0.036	1.53	UP	99.82	0.002193	gi|470121631|ref|XP_004296866.1|	PREDICTED: probable pectinesterase/pectinesterase inhibitor 21-like [Fragaria vesca subsp. vesca]
CL2063_Contig2_All	0.095	1.7	UP	98.46	0.0008831	gi|470130777|ref|XP_004301279.1|	PREDICTED: peroxidase 41-like [Fragaria vesca subsp. vesca]
CL3105_Contig7_All	0.223	1.73	UP	99.46	0.001609	gi|470110423|ref|XP_004291483.1|	PREDICTED: uncharacterized protein LOC101294330 [Fragaria vesca subsp. vesca]
CL696_Contig2_All	0.096	1.51	UP	97.22	0.0005101	gi|470145306|ref|XP_004308282.1|	PREDICTED: L-gulono-1,4-lactone dehydrogenase-like [Fragaria vesca subsp. vesca]
Unigene4344_All	0.097	1.67	UP	90.59	0.001283	gi|470113451|ref|XP_004292937.1|	PREDICTED: uncharacterized protein LOC101306013 [Fragaria vesca subsp. vesca]
Unigene23384_All	0.183	2.12	UP	96.8	6.005e-05	gi|408384474|gb|AFU61922.1|	beta-glucosidase 3 [Fragaria x ananassa]
Unigene8887_All	0.018	1.96	UP	98.64	0.001828	gi|470118422|ref|XP_004295330.1|	PREDICTED: oligopeptide transporter 3-like [Fragaria vesca subsp. vesca]
CL1202_Contig4_All	0.016	1.56	UP	97.31	0.0217	gi|470140320|ref|XP_004305889.1|	PREDICTED: pentatricopeptide repeat-containing protein At4g02750-like [Fragaria vesca subsp. vesca]
CL9500_Contig1_All	0.6	1.98	UP	100	9.294e-05	gi|74197562|emb|CAJ29538.1|	fra a 1 allergen [Fragaria x ananassa]
CL5364_Contig1_All	0.158	1.62	UP	99.46	0.0001755	gi|470125881|ref|XP_004298926.1|	PREDICTED: ubiquitin-conjugating enzyme E2 5-like [Fragaria vesca subsp. vesca]
CL3038_Contig3_All	0.025	1.99	UP	69.97	0.01899	gi|470102722|ref|XP_004287800.1|	PREDICTED: probable pectinesterase 48-like [Fragaria vesca subsp. vesca]
Unigene650_All	0.273	1.75	UP	97.52	0.0002153	gi|470114253|ref|XP_004293330.1|	PREDICTED: plastid-lipid-associated protein, chloroplastic-like [Fragaria vesca subsp. vesca]
CL5740_Contig2_All	0.088	1.92	UP	98.97	0.0009414	gi|470138145|ref|XP_004304819.1|	PREDICTED: aspartic proteinase-like protein 2-like [Fragaria vesca subsp. vesca]
CL7138_Contig1_All	0.093	1.63	UP	95.98	0.0003208	gi|470142111|ref|XP_004306762.1|	PREDICTED: dehydration-responsive protein RD22-like isoform 2 [Fragaria vesca subsp. vesca]
Unigene11387_All	0.07	1.65	UP	97.98	0.00561	gi|470139315|ref|XP_004305396.1|	PREDICTED: probable inactive purple acid phosphatase 27-like [Fragaria vesca subsp. vesca]
CL5730_Contig2_All	0.133	2.04	UP	98.65	0.0004904	gi|470104767|ref|XP_004288767.1|	PREDICTED: heparanase-like protein 3-like [Fragaria vesca subsp. vesca]
Unigene6143_All	0.042	1.57	UP	49.1	0.02965	gi|462415636|gb|EMJ20373.1|	hypothetical protein PRUPE_ppa016645mg [Prunus persica]
CL2740_Contig4_All	0.204	1.51	UP	90.46	0.00042	gi|470123037|ref|XP_004297543.1|	PREDICTED: probable inactive purple acid phosphatase 27-like [Fragaria vesca subsp. vesca]
Unigene177_All	0.085	1.85	UP	96.97	0.003274	gi|470136009|ref|XP_004303795.1|	PREDICTED: vacuolar-processing enzyme-like [Fragaria vesca subsp. vesca]
Unigene6198_All	0.038	1.77	UP	-	0.01239	-	-
Unigene37971_All	0.164	2.34	UP	97.01	0.01334	gi|470139446|ref|XP_004305460.1|	PREDICTED: fasciclin-like arabinogalactan protein 14-like [Fragaria vesca subsp. vesca]
Unigene8018_All	0.03	2.72	UP	96.97	0.0003921	gi|470129285|ref|XP_004300554.1|	PREDICTED: polyneuridine-aldehyde esterase-like isoform 1 [Fragaria vesca subsp. vesca]
Unigene18757_All	0.22	1.55	UP	99.18	0.0001913	gi|470136232|ref|XP_004303900.1|	PREDICTED: uncharacterized oxidoreductase At1g06690, chloroplastic-like [Fragaria vesca subsp. vesca]
CL7114_Contig1_All	0.01	2.24	UP	99.04	0.04869	gi|470146765|ref|XP_004308992.1|	PREDICTED: E3 ubiquitin-protein ligase SHPRH-like [Fragaria vesca subsp. vesca]
CL3975_Contig1_All	0.014	1.68	UP	98.99	1.693e-05	gi|470135612|ref|XP_004303607.1|	PREDICTED: lycopene beta cyclase, chloroplastic-like [Fragaria vesca subsp. vesca]
Unigene20742_All	0.082	1.54	UP	99.25	0.04134	gi|470132538|ref|XP_004302137.1|	PREDICTED: uncharacterized protein At4g13230-like [Fragaria vesca subsp. vesca]
CL7976_Contig1_All	0.175	2.28	UP	98.11	0.0006436	gi|470103710|ref|XP_004288274.1|	PREDICTED: auxin-binding protein ABP19a-like [Fragaria vesca subsp. vesca]
Unigene25248_All	0.204	2	UP	100	0.00676	gi|470111689|ref|XP_004292077.1|	PREDICTED: uncharacterized protein LOC101292375 [Fragaria vesca subsp. vesca]
CL8766_Contig1_All	0.316	1.62	UP	100	1.629e-05	gi|470143808|ref|XP_004307560.1|	PREDICTED: 60S ribosomal protein L23a-like [Fragaria vesca subsp. vesca]
Unigene1093_All	0.116	2.41	UP	99.39	0.001244	gi|470108097|ref|XP_004290371.1|	PREDICTED: pathogenesis-related protein 1B-like [Fragaria vesca subsp. vesca]
CL4789_Contig1_All	0.172	1.64	UP	97.93	0.005004	gi|470122742|ref|XP_004297398.1|	PREDICTED: purple acid phosphatase 8-like [Fragaria vesca subsp. vesca]
Unigene1191_All	0.088	1.87	UP	98.88	0.001468	gi|470105007|ref|XP_004288880.1|	PREDICTED: uncharacterized protein LOC101300395 [Fragaria vesca subsp. vesca]
Unigene200_All	0.023	1.53	UP	98.43	0.00647	gi|470130548|ref|XP_004301165.1|	PREDICTED: probable pectate lyase P59-like [Fragaria vesca subsp. vesca]
Unigene6671_All	0.228	1.51	UP	98.64	0.001422	gi|470116452|ref|XP_004294396.1|	PREDICTED: aspartic proteinase A1-like [Fragaria vesca subsp. vesca]
Unigene16964_All	0.181	1.6	UP	95.83	0.01589	gi|470146394|ref|XP_004308811.1|	PREDICTED: uncharacterized protein LOC101304236 [Fragaria vesca subsp. vesca]
Unigene1258_All	0.148	1.85	UP	95.65	0.0001075	gi|470108042|ref|XP_004290344.1|	PREDICTED: germin-like protein subfamily 1 member 18-like [Fragaria vesca subsp. vesca]
CL5048_Contig2_All	0.15	1.52	UP	95.5	0.001343	gi|470125708|ref|XP_004298842.1|	PREDICTED: uncharacterized protein LOC101295333 [Fragaria vesca subsp. vesca]
CL2945_Contig1_All	0.266	2.24	UP	98.22	1.739e-05	gi|470134558|ref|XP_004303115.1|	PREDICTED: serine carboxypeptidase-like 40-like [Fragaria vesca subsp. vesca]
CL955_Contig2_All	0.189	1.62	UP	99.65	0.005628	gi|470114329|ref|XP_004293368.1|	PREDICTED: probable xyloglucan endotransglucosylase/hydrolase protein 23-like [Fragaria vesca subsp. vesca]
CL955_Contig1_All	0.184	1.93	UP	93.83	0.001164	gi|470114331|ref|XP_004293369.1|	PREDICTED: probable xyloglucan endotransglucosylase/hydrolase protein 23-like [Fragaria vesca subsp. vesca]
CL112_Contig4_All	0.069	1.52	UP	97.73	0.004186	gi|470112691|ref|XP_004292565.1|	PREDICTED: serine carboxypeptidase-like 48-like [Fragaria vesca subsp. vesca]
Unigene13935_All	0.091	1.51	UP	98.55	0.008303	gi|470101223|ref|XP_004287076.1|	PREDICTED: sigma factor SigB regulation protein RsbQ-like [Fragaria vesca subsp. vesca]
Unigene3597_All	0.068	2.07	UP	97.65	0.002629	gi|470149280|ref|XP_004310167.1|	PREDICTED: peroxidase 5-like [Fragaria vesca subsp. vesca]
Unigene372_All	0.032	1.51	UP	99.49	0.02672	gi|470133765|ref|XP_004302730.1|	PREDICTED: laccase-17-like [Fragaria vesca subsp. vesca]
CL3191_Contig2_All	0.088	1.6	UP	98.28	0.01784	gi|470135057|ref|XP_004303347.1|	PREDICTED: uncharacterized protein LOC101310334 [Fragaria vesca subsp. vesca]
CL898_Contig2_All	0.205	1.51	UP	84.32	0.0007006	gi|470107411|ref|XP_004290040.1|	PREDICTED: expansin-like A1-like [Fragaria vesca subsp. vesca]
Unigene4223_All	0.089	1.58	UP	98.67	0.002427	gi|470127390|ref|XP_004299652.1|	PREDICTED: uncharacterized protein LOC101296960 [Fragaria vesca subsp. vesca]
CL93_Contig2_All	0.029	1.79	UP	96.77	0.0004226	gi|470103987|ref|XP_004288406.1|	PREDICTED: uncharacterized protein LOC101310934 isoform 1 [Fragaria vesca subsp. vesca]
CL6448_Contig1_All	0.351	1.52	UP	98.03	0.0003608	gi|470123252|ref|XP_004297642.1|	PREDICTED: aldehyde dehydrogenase family 2 member B7, mitochondrial-like [Fragaria vesca subsp. vesca]
CL5273_Contig2_All	0.298	1.67	UP	89.6	0.0336	gi|470127670|ref|XP_004299789.1|	PREDICTED: ABC transporter I family member 17-like [Fragaria vesca subsp. vesca]
Unigene18379_All	0.056	2.65	UP	64.81	0.000875	gi|462409404|gb|EMJ14738.1|	hypothetical protein PRUPE_ppa019680mg [Prunus persica]
CL6515_Contig1_All	0.075	1.86	UP	97	0.0001874	gi|470118664|ref|XP_004295442.1|	PREDICTED: reticuline oxidase-like protein-like [Fragaria vesca subsp. vesca]
CL6812_Contig2_All	0.187	1.51	UP	97.88	0.0002849	gi|470148575|ref|XP_004309832.1|	PREDICTED: endochitinase PR4-like [Fragaria vesca subsp. vesca]
Unigene9080_All	0.206	2.47	UP	98.6	0.00111	gi|470125772|ref|XP_004298873.1|	PREDICTED: uncharacterized protein LOC101304966 [Fragaria vesca subsp. vesca]
Unigene408_All	0.341	1.68	UP	82.93	0.001251	gi|470116329|ref|XP_004294335.1|	PREDICTED: glyoxylate/succinic semialdehyde reductase 1-like [Fragaria vesca subsp. vesca]
CL726_Contig1_All	0.07	1.54	UP	98.6	0.007292	gi|470121029|ref|XP_004296587.1|	PREDICTED: transmembrane emp24 domain-containing protein p24beta3-like [Fragaria vesca subsp. vesca]
Unigene22908_All	0.262	1.51	UP	92.35	0.00023	gi|470101297|ref|XP_004287111.1|	PREDICTED: outer membrane lipoprotein blc-like [Fragaria vesca subsp. vesca]
Unigene6550_All	0.158	1.57	UP	97.52	0.0001334	gi|470109625|ref|XP_004291093.1|	PREDICTED: subtilisin-like protease-like [Fragaria vesca subsp. vesca]
Unigene17939_All	0.14	2.09	UP	98.63	0.0001671	gi|470126392|ref|XP_004299172.1|	PREDICTED: vignain-like [Fragaria vesca subsp. vesca]
Unigene6704_All	0.061	1.51	UP	96.84	0.0005343	gi|470132598|ref|XP_004302166.1|	PREDICTED: serine carboxypeptidase-like 20-like [Fragaria vesca subsp. vesca]
Unigene748_All	0.073	1.68	UP	99.11	0.003443	gi|470136449|ref|XP_004304006.1|	PREDICTED: lysine histidine transporter 1-like [Fragaria vesca subsp. vesca]
Unigene8538_All	0.069	1.57	UP	77.43	0.008205	gi|470120884|ref|XP_004296517.1|	PREDICTED: early nodulin-like protein 2-like [Fragaria vesca subsp. vesca]
CL3404_Contig3_All	0.066	1.64	UP	42.94	0.0007029	gi|462409404|gb|EMJ14738.1|	hypothetical protein PRUPE_ppa019680mg [Prunus persica]
CL4986_Contig1_All	0.051	1.86	UP	99.15	0.001581	gi|470140470|ref|XP_004305963.1|	PREDICTED: exopolygalacturonase-like [Fragaria vesca subsp. vesca]
CL2026_Contig4_All	0.158	1.86	UP	99.57	5.398e-05	gi|470117167|ref|XP_004294733.1|	PREDICTED: expansin-A8-like [Fragaria vesca subsp. vesca]
CL8766_Contig2_All	0.312	1.58	UP	98.7	0.0003028	gi|470116903|ref|XP_004294612.1|	PREDICTED: 60S ribosomal protein L23a-like [Fragaria vesca subsp. vesca]
Unigene19014_All	0.1	1.72	UP	98.82	0.004958	gi|470143234|ref|XP_004307286.1|	PREDICTED: oryzain beta chain-like [Fragaria vesca subsp. vesca]
Unigene22999_All	0.286	1.57	UP	100	0.0005345	gi|470102088|ref|XP_004287491.1|	PREDICTED: profilin-like [Fragaria vesca subsp. vesca]
Unigene4296_All	0.241	1.56	UP	98.41	0.0001469	gi|470125341|ref|XP_004298661.1|	PREDICTED: acid beta-fructofuranosidase-like [Fragaria vesca subsp. vesca]
Unigene23139_All	0.242	1.6	UP	38.64	0.0008984	gi|159031749|dbj|BAF91846.1|	Sc-RNase [Prunus salicina]
Unigene23463_All	0.078	1.86	UP	96.62	0.0439	gi|470136149|ref|XP_004303860.1|	PREDICTED: probable xyloglucan endotransglucosylase/hydrolase protein 16-like [Fragaria vesca subsp. vesca]
CL1314_Contig2_All	0.065	1.52	UP	96.85	0.0007105	gi|470106304|ref|XP_004289513.1|	PREDICTED: uncharacterized protein LOC101304719 [Fragaria vesca subsp. vesca]
Unigene11358_All	0.334	1.53	UP	98.3	0.0001879	gi|470109332|ref|XP_004290953.1|	PREDICTED: subtilisin-like protease-like [Fragaria vesca subsp. vesca]
CL8488_Contig1_All	0.043	1.53	UP	97.73	0.001259	gi|470116478|ref|XP_004294409.1|	PREDICTED: glucan endo-1,3-beta-glucosidase 13-like [Fragaria vesca subsp. vesca]
Unigene20806_All	0.101	1.64	UP	30.28	0.01696	gi|388505810|gb|AFK40971.1|	unknown [Lotus japonicus]
Unigene15754_All	0.075	1.54	UP	97.49	0.007117	gi|470125942|ref|XP_004298956.1|	PREDICTED: uncharacterized protein LOC101305372 [Fragaria vesca subsp. vesca]
CL7476_Contig4_All	0.278	1.6	UP	100	0.0006883	gi|470136886|ref|XP_004304212.1|	PREDICTED: alpha-1,4-glucan-protein synthase [UDP-forming] 2-like [Fragaria vesca subsp. vesca]
CL6326_Contig2_All	0.1	1.65	UP	95.21	0.0008375	gi|470111992|ref|XP_004292223.1|	PREDICTED: polygalacturonase-like [Fragaria vesca subsp. vesca]
Unigene8769_All	0.239	1.51	UP	99.25	0.002773	gi|470121166|ref|XP_004296652.1|	PREDICTED: cytochrome b5 isoform B-like [Fragaria vesca subsp. vesca]
CL5390_Contig1_All	0.182	1.83	UP	95.21	0.0005496	gi|470135975|ref|XP_004303778.1|	PREDICTED: mannan endo-1,4-beta-mannosidase 4-like [Fragaria vesca subsp. vesca]
Unigene15946_All	0.077	4.72	UP	96.36	2.407e-06	gi|470111845|ref|XP_004292153.1|	PREDICTED: basic form of pathogenesis-related protein 1-like [Fragaria vesca subsp. vesca]
Unigene1082_All	0.045	1.84	UP	98.3	0.0002548	gi|470136751|ref|XP_004304147.1|	PREDICTED: glucan endo-1,3-beta-glucosidase-like [Fragaria vesca subsp. vesca]
Unigene6816_All	0.322	0.63	Down	99.66	4.832e-06	gi|470103570|ref|XP_004288208.1|	PREDICTED: uncharacterized protein LOC101298458 [Fragaria vesca subsp. vesca]
Unigene12861_All	0.045	0.59	Down	97.73	0.0009211	gi|408900675|gb|AFU95106.1|	PetD, partial (chloroplast) [Anthodiscus peruanus]
CL7940_Contig1_All	0.044	0.63	Down	95.94	0.0003672	gi|470113993|ref|XP_004293203.1|	PREDICTED: ZF-HD homeobox protein At4g24660-like [Fragaria vesca subsp. vesca]
Unigene37708_All	0.242	0.66	Down	97.8	0.01072	gi|470112440|ref|XP_004292442.1|	PREDICTED: uncharacterized protein LOC101308743 [Fragaria vesca subsp. vesca]
Unigene15883_All	0.123	0.51	Down	100	0.001429	gi|470139891|ref|XP_004305679.1|	PREDICTED: nuclear transcription factor Y subunit B-3-like [Fragaria vesca subsp. vesca]
Unigene29123_All	0.098	0.63	Down	93.99	0.02073	gi|470120977|ref|XP_004296562.1|	PREDICTED: uncharacterized protein LOC101292204 [Fragaria vesca subsp. vesca]
CL2223_Contig1_All	0.026	0.66	Down	89.22	0.008377	gi|470124868|ref|XP_004298431.1|	PREDICTED: transcription factor HB29-like [Fragaria vesca subsp. vesca]
CL5617_Contig2_All	0.185	0.65	Down	97.56	0.000212	gi|470116514|ref|XP_004294427.1|	PREDICTED: protein GrpE-like [Fragaria vesca subsp. vesca]
CL3936_Contig4_All	0.02	0.64	Down	99.5	0.001514	gi|470129313|ref|XP_004300566.1|	PREDICTED: uncharacterized protein LOC101310520 [Fragaria vesca subsp. vesca]
CL9079_Contig1_All	0.021	0.66	Down	96.53	0.001405	gi|470136305|ref|XP_004303935.1|	PREDICTED: uncharacterized protein LOC101303919 [Fragaria vesca subsp. vesca]
CL7638_Contig2_All	0.128	0.47	Down	98.4	0.0007977	gi|470106523|ref|XP_004289618.1|	PREDICTED: uncharacterized protein LOC101305414 [Fragaria vesca subsp. vesca]
CL52_Contig2_All	0.016	0.62	Down	97.42	0.01491	gi|470112507|ref|XP_004292475.1|	PREDICTED: serine/threonine-protein kinase ATM-like [Fragaria vesca subsp. vesca]
CL4537_Contig1_All	0.06	0.66	Down	96.31	0.003818	gi|470145938|ref|XP_004308588.1|	PREDICTED: DNA-directed RNA polymerase E subunit 1-like [Fragaria vesca subsp. vesca]
Unigene17585_All	0.021	0.61	Down	94.14	0.01697	gi|470120086|ref|XP_004296139.1|	PREDICTED: uncharacterized protein LOC101297525 [Fragaria vesca subsp. vesca]
CL5504_Contig1_All	0.017	0.64	Down	96.31	0.02332	gi|470137883|ref|XP_004304689.1|	PREDICTED: uncharacterized membrane protein At3g27390-like [Fragaria vesca subsp. vesca]
CL6111_Contig1_All	0.037	0.5	Down	97.71	0.0346	gi|470135634|ref|XP_004303617.1|	PREDICTED: kinetochore protein nuf2-like [Fragaria vesca subsp. vesca]
Unigene18369_All	0.336	0.55	Down	100	2.642e-05	gi|470133870|ref|XP_004302782.1|	PREDICTED: 60S ribosomal protein L36-2-like [Fragaria vesca subsp. vesca]
CL5922_Contig3_All	0.116	0.58	Down	94.2	0.04811	gi|470107472|ref|XP_004290069.1|	PREDICTED: nucleolar complex protein 4 homolog [Fragaria vesca subsp. vesca]
Unigene22725_All	0.115	0.46	Down	99.7	4.293e-05	gi|470112175|ref|XP_004292313.1|	PREDICTED: xylem cysteine proteinase 1-like [Fragaria vesca subsp. vesca]
Unigene11370_All	0.089	0.58	Down	96.19	3.039e-05	gi|470110281|ref|XP_004291413.1|	PREDICTED: uncharacterized protein LOC101297799 [Fragaria vesca subsp. vesca]
Unigene20890_All	0.076	0.6	Down	99.1	1.205e-05	gi|470134818|ref|XP_004303233.1|	PREDICTED: magnesium transporter MRS2-1-like [Fragaria vesca subsp. vesca]
CL4848_Contig2_All	0.026	0.61	Down	84.24	0.02663	gi|470138523|ref|XP_004305005.1|	PREDICTED: uncharacterized protein LOC101298347 [Fragaria vesca subsp. vesca]
Unigene11174_All	0.181	0.63	Down	97.5	0.000147	gi|470120729|ref|XP_004296443.1|	PREDICTED: uncharacterized protein LOC101304270 [Fragaria vesca subsp. vesca]
CL2664_Contig2_All	0.118	0.66	Down	94.27	0.001104	gi|470122234|ref|XP_004297150.1|	PREDICTED: protein decapping 5-like [Fragaria vesca subsp. vesca]
Unigene15289_All	0.053	0.57	Down	63.16	0.0003392	gi|462406465|gb|EMJ11929.1|	hypothetical protein PRUPE_ppa021800mg [Prunus persica]
Unigene7899_All	0.153	0.36	Down	96.17	0.0005434	gi|470103972|ref|XP_004288399.1|	PREDICTED: HMG-Y-related protein A-like [Fragaria vesca subsp. vesca]
Unigene8852_All	0.119	0.47	Down	-	0.002703	-	-
Unigene10978_All	0.068	0.56	Down	100	0.0001407	gi|470119035|ref|XP_004295623.1|	PREDICTED: protein RALF-like 19-like [Fragaria vesca subsp. vesca]
Unigene779_All	0.094	0.66	Down	98.21	0.001167	gi|470108044|ref|XP_004290345.1|	PREDICTED: peptide methionine sulfoxide reductase B2, chloroplastic-like [Fragaria vesca subsp. vesca]
Unigene4266_All	0.126	0.63	Down	96.68	0.0002747	gi|470134534|ref|XP_004303103.1|	PREDICTED: uncharacterized protein LOC101305087 [Fragaria vesca subsp. vesca]
CL570_Contig1_All	0.035	0.59	Down	97.42	0.000297	gi|470101578|ref|XP_004287247.1|	PREDICTED: protein OS-9 homolog [Fragaria vesca subsp. vesca]
CL7259_Contig2_All	0.092	0.66	Down	98.03	0.03026	gi|470129567|ref|XP_004300684.1|	PREDICTED: uncharacterized protein LOC101299385 [Fragaria vesca subsp. vesca]
CL1257_Contig5_All	0.039	0.61	Down	47.95	0.00135	gi|462416221|gb|EMJ20958.1|	hypothetical protein PRUPE_ppa024582mg [Prunus persica]
Unigene10702_All	0.025	0.63	Down	97.86	0.0005998	gi|470145590|ref|XP_004308419.1|	PREDICTED: xylem serine proteinase 1-like [Fragaria vesca subsp. vesca]
CL2530_Contig1_All	0.128	0.62	Down	96.62	0.0002863	gi|470128841|ref|XP_004300342.1|	PREDICTED: uncharacterized protein LOC101314953 [Fragaria vesca subsp. vesca]
CL1897_Contig2_All	0.078	0.62	Down	81.11	0.04943	gi|224075818|ref|XP_002304782.1|	predicted protein [Populus trichocarpa]
Unigene17084_All	0.099	0.41	Down	91.21	0.001119	gi|242091445|ref|XP_002441555.1|	hypothetical protein SORBIDRAFT_09g029240 [Sorghum bicolor]
CL2505_Contig1_All	0.529	0.66	Down	99.29	5.919e-05	gi|470109295|ref|XP_004290935.1|	PREDICTED: MFP1 attachment factor 1-like [Fragaria vesca subsp. vesca]
Unigene23446_All	0.053	0.61	Down	98.56	0.0004207	gi|470114161|ref|XP_004293285.1|	PREDICTED: uncharacterized protein LOC101291898 [Fragaria vesca subsp. vesca]
CL8525_Contig1_All	0.165	0.65	Down	99.21	6.356e-05	gi|470108545|ref|XP_004290576.1|	PREDICTED: basic blue protein-like [Fragaria vesca subsp. vesca]
CL9070_Contig2_All	0.342	0.65	Down	98.03	0.001468	gi|470133693|ref|XP_004302695.1|	PREDICTED: uncharacterized protein LOC101305189 [Fragaria vesca subsp. vesca]
CL4327_Contig1_All	0.042	0.65	Down	98.68	0.0005299	gi|470117258|ref|XP_004294778.1|	PREDICTED: uncharacterized protein LOC101310877 [Fragaria vesca subsp. vesca]
Unigene9200_All	0.056	0.65	Down	52.04	0.0002729	gi|470124264|ref|XP_004298136.1|	PREDICTED: phylloplanin-like [Fragaria vesca subsp. vesca]
Unigene4265_All	0.319	0.55	Down	98.74	5.993e-07	gi|75288886|sp|Q66PF4.1|CGT_FRAAN	RecName: Full=Cinnamate beta-D-glucosyltransferase; AltName: Full=UDP-glucose:cinnamate glucosyltransferase; Short=FaGT2
Unigene4352_All	0.35	0.66	Down	98.21	0.0001342	gi|470101683|ref|XP_004287299.1|	PREDICTED: uncharacterized protein LOC101290982 isoform 1 [Fragaria vesca subsp. vesca]
CL1219_Contig1_All	0.06	0.37	Down	91.82	0.004373	gi|470123838|ref|XP_004297927.1|	PREDICTED: myosin-H heavy chain-like [Fragaria vesca subsp. vesca]
Unigene1187_All	0.03	0.59	Down	97.76	0.002473	gi|470127297|ref|XP_004299609.1|	PREDICTED: uncharacterized protein LOC101307303 [Fragaria vesca subsp. vesca]
CL1303_Contig1_All	0.102	0.66	Down	71.04	0.001794	gi|460405747|ref|XP_004248336.1|	PREDICTED: nudix hydrolase 2-like [Solanum lycopersicum]
CL5524_Contig1_All	0.07	0.43	Down	92.47	0.0006577	gi|470130460|ref|XP_004301121.1|	PREDICTED: histone deacetylase 5-like [Fragaria vesca subsp. vesca]
Unigene1203_All	0.056	0.65	Down	98.12	1.246e-05	gi|470135932|ref|XP_004303759.1|	PREDICTED: pectinesterase 3-like [Fragaria vesca subsp. vesca]
CL6268_Contig1_All	0.332	0.58	Down	97.6	3.329e-05	gi|470116838|ref|XP_004294581.1|	PREDICTED: THO complex subunit 4-A-like [Fragaria vesca subsp. vesca]
Unigene5676_All	0.012	0.65	Down	90.75	0.002536	gi|470130614|ref|XP_004301198.1|	PREDICTED: disease resistance protein At4g27190-like [Fragaria vesca subsp. vesca]
CL4737_Contig1_All	0.014	0.48	Down	98.37	0.00165	gi|470110293|ref|XP_004291419.1|	PREDICTED: E3 ubiquitin-protein ligase At4g11680-like [Fragaria vesca subsp. vesca]
CL4096_Contig4_All	0.076	0.34	Down	91.49	3.672e-05	gi|470132909|ref|XP_004302317.1|	PREDICTED: uncharacterized protein LOC101311974 isoform 2 [Fragaria vesca subsp. vesca]
CL2263_Contig1_All	0.011	0.4	Down	96.68	0.0002003	gi|470120086|ref|XP_004296139.1|	PREDICTED: uncharacterized protein LOC101297525 [Fragaria vesca subsp. vesca]
Unigene7964_All	0.241	0.62	Down	98.49	3.869e-05	gi|470111854|ref|XP_004292157.1|	PREDICTED: uncharacterized protein LOC101302425 [Fragaria vesca subsp. vesca]
Unigene1128_All	0.144	0.66	Down	93.09	0.0001502	gi|470137071|ref|XP_004304301.1|	PREDICTED: uncharacterized protein LOC101291847 [Fragaria vesca subsp. vesca]
CL2020_Contig1_All	0.084	0.52	Down	100	0.0003716	gi|470125995|ref|XP_004298981.1|	PREDICTED: small nuclear ribonucleoprotein-associated protein B'-like isoform 1 [Fragaria vesca subsp. vesca]
CL582_Contig1_All	0.073	0.52	Down	98.42	0.001476	gi|470113894|ref|XP_004293154.1|	PREDICTED: gibberellin 3-beta-dioxygenase 4-like [Fragaria vesca subsp. vesca]
CL6989_Contig3_All	0.324	0.64	Down	98.04	0.01251	gi|470116973|ref|XP_004294645.1|	PREDICTED: uncharacterized protein LOC101292387 [Fragaria vesca subsp. vesca]
Unigene13469_All	0.146	0.61	Down	95.51	1.763e-05	gi|470134627|ref|XP_004303149.1|	PREDICTED: thioredoxin M-type, chloroplastic-like [Fragaria vesca subsp. vesca]
CL1675_Contig4_All	0.182	0.62	Down	98.58	0.007316	gi|470147869|ref|XP_004309500.1|	PREDICTED: probable cinnamyl alcohol dehydrogenase 1-like [Fragaria vesca subsp. vesca]
Unigene6615_All	0.026	0.52	Down	99.29	0.002335	gi|470123244|ref|XP_004297638.1|	PREDICTED: equilibrative nucleotide transporter 1-like [Fragaria vesca subsp. vesca]
Unigene6795_All	0.024	0.6	Down	98.69	0.01492	gi|470143181|ref|XP_004307260.1|	PREDICTED: metacaspase-1-like [Fragaria vesca subsp. vesca]
CL7097_Contig1_All	0.09	0.56	Down	99.69	0.0003961	gi|470142808|ref|XP_004307087.1|	PREDICTED: transcription factor HBP-1b(c1)-like [Fragaria vesca subsp. vesca]
CL1207_Contig1_All	0.052	0.61	Down	100	5.348e-05	gi|470137280|ref|XP_004304397.1|	PREDICTED: nuclear transcription factor Y subunit B-10-like [Fragaria vesca subsp. vesca]
CL3778_Contig8_All	0.16	0.38	Down	-	0.0002108	-	-
Unigene22705_All	0.04	0.42	Down	98.81	0.000897	gi|470128862|ref|XP_004300352.1|	PREDICTED: COP9 signalosome complex subunit 7-like [Fragaria vesca subsp. vesca]
CL4096_Contig3_All	0.076	0.49	Down	90.96	3.87e-05	gi|470132909|ref|XP_004302317.1|	PREDICTED: uncharacterized protein LOC101311974 isoform 2 [Fragaria vesca subsp. vesca]
Unigene8391_All	0.017	0.56	Down	96.51	0.01827	gi|470130942|ref|XP_004301360.1|	PREDICTED: uncharacterized protein LOC101307700 [Fragaria vesca subsp. vesca]
CL200_Contig13_All	0.039	0.66	Down	89.3	3.319e-05	gi|470136673|ref|XP_004304108.1|	PREDICTED: cytochrome P450 71D11-like [Fragaria vesca subsp. vesca]
CL5252_Contig2_All	0.052	0.6	Down	98.46	0.0002558	gi|470121723|ref|XP_004296910.1|	PREDICTED: uncharacterized protein LOC101305932 [Fragaria vesca subsp. vesca]
CL6368_Contig2_All	0.046	0.63	Down	95.93	0.01001	gi|470144530|ref|XP_004307907.1|	PREDICTED: serine/threonine-protein phosphatase 4 regulatory subunit 2-like [Fragaria vesca subsp. vesca]
Unigene11523_All	0.04	0.53	Down	99.21	3.86e-05	gi|470107545|ref|XP_004290105.1|	PREDICTED: ribonuclease 2-like [Fragaria vesca subsp. vesca]
Unigene11393_All	0.058	0.64	Down	95.59	0.00489	gi|470125989|ref|XP_004298978.1|	PREDICTED: uncharacterized protein LOC101312152 [Fragaria vesca subsp. vesca]
CL2181_Contig10_All	0.07	0.65	Down	66.44	0.01181	gi|470138821|ref|XP_004305152.1|	PREDICTED: putative disease resistance protein RGA1-like [Fragaria vesca subsp. vesca]
CL1357_Contig1_All	0.423	0.49	Down	100	1.907e-05	gi|353259707|gb|AEQ75492.1|	ubiquitin extension protein [Rosa multiflora]
CL1353_Contig3_All	0.043	0.66	Down	98.78	0.000469	gi|470111226|ref|XP_004291850.1|	PREDICTED: bifunctional nuclease 1-like [Fragaria vesca subsp. vesca]
Unigene10880_All	0.025	0.6	Down	97.76	0.0007113	gi|470127209|ref|XP_004299568.1|	PREDICTED: uncharacterized protein LOC101294075 [Fragaria vesca subsp. vesca]
Unigene18372_All	0.079	0.65	Down	100	0.003881	gi|470143029|ref|XP_004307190.1|	PREDICTED: tubulin-specific chaperone A-like isoform 1 [Fragaria vesca subsp. vesca]
Unigene18907_All	0.049	0.6	Down	98.63	0.000709	gi|470132490|ref|XP_004302114.1|	PREDICTED: GDSL esterase/lipase At5g33370-like [Fragaria vesca subsp. vesca]
Unigene17867_All	0.031	0.62	Down	97.59	0.0004973	gi|470130261|ref|XP_004301022.1|	PREDICTED: cytochrome P450 71A25-like [Fragaria vesca subsp. vesca]
CL8962_Contig2_All	0.06	0.55	Down	93.11	0.004954	gi|470125940|ref|XP_004298955.1|	PREDICTED: U3 small nucleolar ribonucleoprotein protein mpp10-like [Fragaria vesca subsp. vesca]
Unigene5562_All	0.041	0.55	Down	82.6	0.001749	gi|470141715|ref|XP_004306575.1|	PREDICTED: F-box protein CPR30-like isoform 1 [Fragaria vesca subsp. vesca]
CL9316_Contig2_All	0.227	0.52	Down	93.33	0.01256	gi|225426230|ref|XP_002263323.1|	PREDICTED: luminal-binding protein 5 [Vitis vinifera]
Unigene6642_All	0.035	0.43	Down	98.64	0.002035	gi|470136587|ref|XP_004304068.1|	PREDICTED: uncharacterized protein LOC101295150 [Fragaria vesca subsp. vesca]
Unigene12185_All	0.062	0.63	Down	99.31	0.00156	gi|470122716|ref|XP_004297385.1|	PREDICTED: probable polygalacturonase At1g80170-like [Fragaria vesca subsp. vesca]
Unigene35981_All	0.187	0.57	Down	98.67	0.002748	gi|326527899|dbj|BAJ89001.1|	predicted protein [Hordeum vulgare subsp. vulgare]
CL9007_Contig1_All	0.057	0.65	Down	96.96	0.0007246	gi|470117561|ref|XP_004294925.1|	PREDICTED: uncharacterized protein LOC101306025 [Fragaria vesca subsp. vesca]
Unigene18136_All	0.12	0.65	Down	86.86	0.002371	gi|470130628|ref|XP_004301205.1|	PREDICTED: uncharacterized protein LOC101303233 [Fragaria vesca subsp. vesca]
Unigene23521_All	0.195	0.64	Down	99.37	0.02153	gi|470132445|ref|XP_004302092.1|	PREDICTED: uncharacterized protein LOC101292320 [Fragaria vesca subsp. vesca]
CL3073_Contig3_All	0.033	0.62	Down	98.46	0.0007016	gi|470116954|ref|XP_004294637.1|	PREDICTED: laccase-17-like [Fragaria vesca subsp. vesca]
Unigene20651_All	0.111	0.64	Down	97.53	0.007396	gi|470148255|ref|XP_004309684.1|	PREDICTED: uncharacterized protein LOC101305716 [Fragaria vesca subsp. vesca]
Unigene11388_All	0.085	0.59	Down	97.86	0.0002355	gi|470142187|ref|XP_004306796.1|	PREDICTED: uncharacterized protein LOC101304703 [Fragaria vesca subsp. vesca]
CL354_Contig4_All	0.041	0.51	Down	96.31	0.01252	gi|470128452|ref|XP_004300155.1|	PREDICTED: UDP-glycosyltransferase 73B3-like [Fragaria vesca subsp. vesca]
CL7596_Contig2_All	0.202	0.65	Down	99.12	0.001376	gi|470137338|ref|XP_004304424.1|	PREDICTED: V-type proton ATPase subunit G-like isoform 1 [Fragaria vesca subsp. vesca]
CL8614_Contig1_All	0.027	0.61	Down	98.63	0.002076	gi|470123401|ref|XP_004297715.1|	PREDICTED: transcription factor DIVARICATA-like [Fragaria vesca subsp. vesca]
CL1839_Contig1_All	0.064	0.61	Down	97.45	0.002018	gi|470115389|ref|XP_004293885.1|	PREDICTED: squamosa promoter-binding protein 1-like [Fragaria vesca subsp. vesca]
CL5039_Contig1_All	0.114	0.58	Down	95.35	0.0002174	gi|470142582|ref|XP_004306983.1|	PREDICTED: uncharacterized protein LOC101313926 [Fragaria vesca subsp. vesca]
Unigene9368_All	0.04	0.62	Down	97.77	0.001796	gi|470113441|ref|XP_004292932.1|	PREDICTED: pentatricopeptide repeat-containing protein At1g20230-like [Fragaria vesca subsp. vesca]
CL2748_Contig1_All	0.177	0.33	Down	-	1.994e-07	-	-
Unigene3825_All	0.558	0.59	Down	96.45	7.352e-05	gi|470122880|ref|XP_004297466.1|	PREDICTED: HMG-Y-related protein A-like [Fragaria vesca subsp. vesca]
Unigene10602_All	0.078	0.44	Down	80.21	2.5e-05	gi|470119037|ref|XP_004295624.1|	PREDICTED: rapid alkalinization factor-like [Fragaria vesca subsp. vesca]
Unigene19598_All	0.328	0.36	Down	93.55	9.438e-05	gi|357476845|ref|XP_003608708.1|	40S ribosomal protein S30 [Medicago truncatula]
CL2623_Contig1_All	0.25	0.63	Down	100	0.0005514	gi|470135720|ref|XP_004303657.1|	PREDICTED: coatomer subunit zeta-2-like [Fragaria vesca subsp. vesca]
Unigene11881_All	0.057	0.6	Down	98.1	0.04688	gi|470140557|ref|XP_004306006.1|	PREDICTED: uncharacterized protein LOC101301900 [Fragaria vesca subsp. vesca]
CL4092_Contig15_All	0.073	0.62	Down	-	0.01032	-	-
Unigene13135_All	0.037	0.63	Down	97.32	0.0003872	gi|470114817|ref|XP_004293605.1|	PREDICTED: uncharacterized protein LOC101313872 isoform 1 [Fragaria vesca subsp. vesca]
Unigene18612_All	0.017	0.49	Down	98.9	0.0001326	gi|470125641|ref|XP_004298810.1|	PREDICTED: cytochrome P450 86A2-like [Fragaria vesca subsp. vesca]
