# Supplementary material for: Combined transcriptomic and proteomic analysis reveals multiple pathways involved in self-pollen tube development and the potential roles of FviYABBY1 in self-incompatibility in Fragaria viridis
Source: Front Plant Sci. 2022 Sep 14;13:927001. doi: 10.3389/fpls.2022.927001 (PMC9515988; doi:10.3389/fpls.2022.927001)
Supplement: Supplementary file 6 [file Table_6.XLSX]

## Sheet: Table S6
Supplementary Table S6. KEGG pathways of DAPs.
KEGG Pathway	DAPs with pathway annotation (151)	Pathway ID	Proteins
Pentose and glucuronate interconversions	10 (6.62%)	ko00040	Unigene20258_All, CL4292_Contig1_All, CL3038_Contig3_All, Unigene1203_All, Unigene200_All, CL6448_Contig1_All, Unigene12185_All, CL4986_Contig1_All, CL8614_Contig1_All, CL6326_Contig2_All
Starch and sucrose metabolism	13 (8.61%)	ko00500	Unigene20258_All, CL4292_Contig1_All, Unigene4344_All, Unigene23384_All, CL3038_Contig3_All, CL1303_Contig1_All, Unigene1203_All, Unigene18907_All, Unigene12185_All, CL4986_Contig1_All, CL8614_Contig1_All, Unigene4296_All, CL6326_Contig2_All
Phenylpropanoid biosynthesis	8 (5.3%)	ko00940	CL2063_Contig2_All, Unigene4344_All, Unigene23384_All, Unigene4265_All, CL1675_Contig4_All, Unigene3597_All, Unigene18907_All, CL1314_Contig2_All
Tryptophan metabolism	4 (2.65%)	ko00380	Unigene4266_All, CL6448_Contig1_All, Unigene11393_All, Unigene17867_All
Plant hormone signal transduction	8 (5.3%)	ko04075	Unigene37708_All, Unigene34598_All, Unigene1093_All, CL955_Contig2_All, CL955_Contig1_All, CL7097_Contig1_All, CL1839_Contig1_All, Unigene15946_All
Proteasome	4 (2.65%)	ko03050	CL7138_Contig1_All, CL9070_Contig2_All, Unigene18379_All, CL3404_Contig3_All
Pyruvate metabolism	5 (3.31%)	ko00620	CL696_Contig2_All, Unigene17084_All, CL6448_Contig1_All, CL6515_Contig1_All, Unigene11358_All
Isoflavonoid biosynthesis	2 (1.32%)	ko00943	CL200_Contig13_All, CL5252_Contig2_All
Limonene and pinene degradation	2 (1.32%)	ko00903	CL6448_Contig1_All, Unigene17867_All
Indole alkaloid biosynthesis	1 (0.66%)	ko00901	Unigene8018_All
Nitrogen metabolism	2 (1.32%)	ko00910	Unigene5562_All, Unigene8769_All
Circadian rhythm - plant	2 (1.32%)	ko04712	CL8614_Contig1_All, Unigene13135_All
Cyanoamino acid metabolism	3 (1.99%)	ko00460	Unigene4344_All, Unigene23384_All, Unigene18907_All
beta-Alanine metabolism	2 (1.32%)	ko00410	Unigene13935_All, CL6448_Contig1_All
Endocytosis	7 (4.64%)	ko04144	Unigene4344_All, CL7138_Contig1_All, Unigene10702_All, CL7976_Contig1_All, Unigene1258_All, Unigene6550_All, Unigene11358_All
Diterpenoid biosynthesis	1 (0.66%)	ko00904	CL582_Contig1_All
Degradation of aromatic compounds	1 (0.66%)	ko01220	Unigene11358_All
Sesquiterpenoid and triterpenoid biosynthesis	1 (0.66%)	ko00909	CL200_Contig13_All
Propanoate metabolism	2 (1.32%)	ko00640	Unigene13935_All, Unigene11358_All
Glyoxylate and dicarboxylate metabolism	3 (1.99%)	ko00630	Unigene17084_All, Unigene5562_All, Unigene408_All
Phagosome	3 (1.99%)	ko04145	Unigene35981_All, Unigene11388_All, CL7596_Contig2_All
Fatty acid degradation	2 (1.32%)	ko00071	CL6448_Contig1_All, Unigene11358_All
Valine, leucine and isoleucine degradation	2 (1.32%)	ko00280	Unigene13935_All, CL6448_Contig1_All
Glycerolipid metabolism	3 (1.99%)	ko00561	Unigene4344_All, CL6448_Contig1_All, Unigene18907_All
Histidine metabolism	1 (0.66%)	ko00340	CL6448_Contig1_All
Vitamin B6 metabolism	1 (0.66%)	ko00750	Unigene18757_All
Terpenoid backbone biosynthesis	2 (1.32%)	ko00900	Unigene4344_All, Unigene18907_All
Plant-pathogen interaction	5 (3.31%)	ko04626	Unigene34598_All, Unigene5676_All, Unigene1093_All, Unigene5562_All, Unigene15946_All
Zeatin biosynthesis	1 (0.66%)	ko00908	CL354_Contig4_All
Lysine degradation	1 (0.66%)	ko00310	CL6448_Contig1_All
Cutin, suberine and wax biosynthesis	1 (0.66%)	ko00073	Unigene18612_All
Glycosaminoglycan degradation	1 (0.66%)	ko00531	CL5730_Contig2_All
Butanoate metabolism	1 (0.66%)	ko00650	Unigene408_All
Other glycan degradation	2 (1.32%)	ko00511	Unigene4344_All, Unigene18907_All
Fructose and mannose metabolism	2 (1.32%)	ko00051	CL4892_Contig1_All, CL5390_Contig1_All
Flavone and flavonol biosynthesis	1 (0.66%)	ko00944	CL354_Contig4_All
Base excision repair	1 (0.66%)	ko03410	CL5252_Contig2_All
RNA polymerase	1 (0.66%)	ko03020	Unigene1082_All
Ascorbate and aldarate metabolism	2 (1.32%)	ko00053	CL696_Contig2_All, CL6448_Contig1_All
Carotenoid biosynthesis	1 (0.66%)	ko00906	CL3975_Contig1_All
Porphyrin and chlorophyll metabolism	2 (1.32%)	ko00860	Unigene4344_All, Unigene18907_All
Carbon fixation in photosynthetic organisms	2 (1.32%)	ko00710	Unigene1000_All, Unigene17084_All
Stilbenoid, diarylheptanoid and gingerol biosynthesis	1 (0.66%)	ko00945	Unigene17867_All
Cysteine and methionine metabolism	2 (1.32%)	ko00270	Unigene16355_All, Unigene17084_All
Spliceosome	5 (3.31%)	ko03040	Unigene11174_All, Unigene1187_All, CL6268_Contig1_All, CL2020_Contig1_All, CL3191_Contig2_All
Arginine biosynthesis	1 (0.66%)	ko00220	Unigene5562_All
Protein export	1 (0.66%)	ko03060	CL9316_Contig2_All
Ribosome biogenesis in eukaryotes	2 (1.32%)	ko03008	CL1897_Contig2_All, CL8962_Contig2_All
Ribosome	6 (3.97%)	ko03010	Unigene18369_All, CL8766_Contig1_All, CL1357_Contig1_All, CL9007_Contig1_All, CL8766_Contig2_All, Unigene19598_All
Amino sugar and nucleotide sugar metabolism	3 (1.99%)	ko00520	CL1303_Contig1_All, CL6812_Contig2_All, CL7476_Contig4_All
Fatty acid biosynthesis	1 (0.66%)	ko00061	Unigene11358_All
Arginine and proline metabolism	1 (0.66%)	ko00330	CL6448_Contig1_All
ABC transporters	1 (0.66%)	ko02010	CL5273_Contig2_All
mRNA surveillance pathway	3 (1.99%)	ko03015	CL4892_Contig1_All, Unigene37971_All, CL6268_Contig1_All
Citrate cycle (TCA cycle)	1 (0.66%)	ko00020	Unigene17084_All
Tyrosine metabolism	1 (0.66%)	ko00350	Unigene11358_All
Pyrimidine metabolism	2 (1.32%)	ko00240	CL9007_Contig1_All, Unigene1082_All
Alanine, aspartate and glutamate metabolism	1 (0.66%)	ko00250	Unigene5562_All
Photosynthesis	1 (0.66%)	ko00195	Unigene12861_All
Metabolic pathways	37 (24.5%)	ko01100	Unigene12861_All, Unigene16355_All, Unigene1000_All, Unigene20258_All, CL4292_Contig1_All, CL2063_Contig2_All, CL696_Contig2_All, Unigene4344_All, Unigene23384_All, CL3038_Contig3_All, Unigene4266_All, CL5730_Contig2_All, Unigene17084_All, Unigene18757_All, CL3975_Contig1_All, Unigene1203_All, CL1675_Contig4_All, Unigene13935_All, Unigene3597_All, CL6448_Contig1_All, Unigene11393_All, Unigene1890…
RNA degradation	2 (1.32%)	ko03018	CL9079_Contig1_All, CL6989_Contig3_All
Carbon metabolism	5 (3.31%)	ko01200	Unigene1000_All, Unigene17084_All, Unigene13935_All, Unigene408_All, Unigene11358_All
Pentose phosphate pathway	1 (0.66%)	ko00030	Unigene1000_All
RNA transport	4 (2.65%)	ko03013	Unigene6143_All, CL2505_Contig1_All, CL6268_Contig1_All, Unigene4223_All
Glycolysis / Gluconeogenesis	2 (1.32%)	ko00010	CL6448_Contig1_All, Unigene11358_All
Biosynthesis of secondary metabolites	20 (13.25%)	ko01110	Unigene16355_All, Unigene1000_All, CL2063_Contig2_All, CL696_Contig2_All, Unigene4344_All, Unigene23384_All, Unigene17084_All, Unigene8018_All, CL3975_Contig1_All, CL582_Contig1_All, CL1675_Contig4_All, Unigene3597_All, CL200_Contig13_All, CL5252_Contig2_All, CL6448_Contig1_All, Unigene18907_All, Unigene17867_All, CL354_Contig4_All, CL1314_Contig2_All, Unigene11358_All
Protein processing in endoplasmic reticulum	3 (1.99%)	ko04141	CL570_Contig1_All, Unigene5562_All, CL9316_Contig2_All
Fatty acid metabolism	1 (0.66%)	ko01212	Unigene11358_All
Aminoacyl-tRNA biosynthesis	1 (0.66%)	ko00970	Unigene5562_All
Ubiquitin mediated proteolysis	1 (0.66%)	ko04120	CL5364_Contig1_All
Galactose metabolism	1 (0.66%)	ko00052	Unigene4296_All
Oxidative phosphorylation	1 (0.66%)	ko00190	CL7596_Contig2_All
Biosynthesis of amino acids	3 (1.99%)	ko01230	Unigene16355_All, Unigene1000_All, Unigene5562_All
Purine metabolism	1 (0.66%)	ko00230	Unigene1082_All
