# Supplementary material for: Combined transcriptomic and proteomic analysis reveals multiple pathways involved in self-pollen tube development and the potential roles of FviYABBY1 in self-incompatibility in Fragaria viridis
Source: Front Plant Sci. 2022 Sep 14;13:927001. doi: 10.3389/fpls.2022.927001 (PMC9515988; doi:10.3389/fpls.2022.927001)
Supplement: Supplementary file 7 [file Table_7.XLSX]

## Sheet: Table S7
Supplementary Table S7. Genes used for correlation analysis at transcript and proteomic level.
Gene ID	log2(Protein FC)	log2(Transcript FC)
Unigene1166_All	-0.251543	-0.504719
Unigene6808_All	-0.234465	0.565315
Unigene8570_All	0.111031	-0.176751
Unigene1085_All	-0.268818	-0.212433
Unigene1265_All	0.124328	-0.400544
Unigene1242_All	-0.13606	0.298337
Unigene13840_All	-0.13606	-0.360728
Unigene11353_All	-0.0588983	-0.326367
Unigene18182_All	0.238786	-0.119843
Unigene10484_All	0.310339	-0.0544836
Unigene15636_All	-0.395929	-0.302189
Unigene21122_All	-0.494108	-0.305632
Unigene8642_All	0.555816	1.28156
Unigene4417_All	0.0143553	0.00744484
Unigene23532_All	-0.0144981	0.145899
Unigene6816_All	-0.666575	-0.01591
Unigene184_All	0.941107	0.399722
Unigene11217_All	-0.0291489	0.141487
Unigene3711_All	0.464668	1.56706
Unigene6736_All	0.0143553	-0.0903475
Unigene14041_All	0.0703893	0.184789
Unigene18593_All	0.163499	-0.0362568
Unigene3777_All	-0.234465	0.00169534
Unigene4400_All	0.0976115	-0.0835826
Unigene13450_All	-0.0291489	-0.26843
Unigene16203_All	0.263035	-0.599004
Unigene36373_All	-0.0892676	-0.0351266
Unigene9106_All	-0.168129	0.0932251
Unigene16415_All	-0.304009	-0.704458
Unigene4345_All	0	-0.0366029
Unigene1153_All	0.367371	-0.201218
Unigene16102_All	-0.0144981	0.151417
Unigene11325_All	0.042644	-0.025473
Unigene16201_All	-0.0291489	-0.316558
Unigene15240_All	-0.473932	-0.00442615
Unigene13461_All	0.275008	0.0588172
Unigene6451_All	-0.18442	-0.246846
Unigene11439_All	0.0285694	-0.219165
Unigene11449_All	-0.321928	-0.38816
Unigene21013_All	-0.200919	-0.0858843
Unigene4227_All	-0.304009	0.247346
Unigene1026_All	0.0285694	-0.15084
Unigene22984_All	-0.0892676	-0.316211
Unigene18394_All	0.15056	-0.0268316
Unigene4391_All	-0.120299	0.223377
Unigene685_All	-0.0588983	-0.00582411
Unigene179_All	-0.0739984	-0.182501
Unigene34452_All	0.0285694	-0.352599
Unigene4256_All	0.0565842	-0.0480581
Unigene15713_All	-0.168129	0.153433
Unigene20865_All	-0.251543	0.86289
Unigene15132_All	-0.494108	-1.3744
Unigene17978_All	-0.18442	0.158892
Unigene6598_All	-0.120299	-0.0150761
Unigene11197_All	-0.152002	0.047315
Unigene13211_All	-0.340072	-0.321917
Unigene1235_All	-0.0588983	-0.0825401
Unigene20875_All	0.367371	-0.187123
Unigene1340_All	-0.0892676	-0.173323
Unigene4236_All	-0.120299	-0.0507137
Unigene22857_All	-0.304009	-0.144718
Unigene18686_All	0.0703893	0.219745
Unigene23531_All	-0.0892676	-0.567541
Unigene16160_All	-0.0144981	-0.207628
Unigene13757_All	-0.358453	-0.380439
Unigene1384_All	0.201634	0.0406949
Unigene13946_All	0.0840646	-0.0925104
Unigene12861_All	-0.761217	0.610061
Unigene2625_All	0.356144	0.249476
Unigene15141_All	0.15056	-0.0704583
Unigene11204_All	0	-0.214267
Unigene11216_All	0.0143553	-0.334414
Unigene10506_All	-0.556395	0.50916
Unigene20195_All	0.176322	0.870379
Unigene11253_All	1.10434	-0.492241
Unigene23454_All	-0.377068	-0.303715
Unigene20824_All	0.286881	-0.205192
Unigene22911_All	0.389566	0.0043229
Unigene11560_All	0.0143553	-0.227566
Unigene20590_All	-0.0291489	-0.160974
Unigene16194_All	0.124328	0.0911727
Unigene6603_All	0.163499	0.0796836
Unigene20794_All	-0.0439464	-0.139286
Unigene23605_All	0.042644	-0.0739895
Unigene4281_All	-0.0588983	-0.838315
Unigene16225_All	-0.415034	-0.0971106
Unigene11467_All	-0.200919	-0.101012
Unigene16059_All	0.0703893	-0.476184
Unigene23411_All	-0.217591	0.00486927
Unigene23257_All	0.0976115	-0.0930303
Unigene23209_All	0.042644	0.0172893
Unigene20986_All	0.111031	0.137931
Unigene33_All	-0.200919	-0.0172219
Unigene16071_All	0.0285694	0.0736005
Unigene23147_All	-0.104699	-0.592515
Unigene27971_All	-0.168129	0.362892
Unigene20544_All	0.0976115	0.0335369
Unigene1030_All	0.163499	0.152952
Unigene17859_All	-0.18442	-0.579078
Unigene22674_All	-0.268818	-0.42977
Unigene11025_All	-0.13606	0.166907
Unigene20334_All	-0.120299	-0.290712
Unigene1181_All	-0.18442	-0.194905
Unigene22767_All	-0.268818	-0.315934
Unigene3449_All	-0.120299	-0.178059
Unigene8773_All	-0.621487	-0.102976
Unigene18135_All	-0.200919	0.00140333
Unigene4399_All	-0.251543	-0.171404
Unigene11342_All	0.321928	-0.303518
Unigene7345_All	-0.0739984	-0.753392
Unigene14072_All	0.111031	0.10276
Unigene511_All	0.0976115	-0.49591
Unigene14012_All	0	-0.335211
Unigene16239_All	-0.152002	-0.247189
Unigene13853_All	-0.152002	-0.136629
Unigene5849_All	0.0703893	0.341485
Unigene13495_All	-0.304009	0.200487
Unigene15944_All	-0.304009	0.010826
Unigene6088_All	0.575312	-0.291118
Unigene13508_All	0.0840646	-0.140526
Unigene6674_All	0.0285694	-0.0921761
Unigene16357_All	-0.0144981	-0.673949
Unigene15904_All	0.214125	0.397136
Unigene11447_All	0.263035	-0.114479
Unigene6806_All	0.238786	0.205809
Unigene8955_All	-0.340072	-0.152514
Unigene16183_All	0.0143553	-0.0193629
Unigene16178_All	0.321928	-0.530697
Unigene21062_All	0	-0.0125281
Unigene14023_All	0	-0.0846057
Unigene13042_All	-0.0291489	-0.134984
Unigene817_All	-0.120299	0.127302
Unigene16352_All	-0.0739984	-0.288045
Unigene4183_All	-0.0892676	-0.0796513
Unigene6739_All	0.111031	0.118455
Unigene21048_All	0.263035	-0.074501
Unigene3750_All	0.0703893	-0.177088
Unigene13326_All	-0.0739984	-0.19538
Unigene6467_All	-0.358453	-0.118434
Unigene24734_All	-0.0439464	0.159448
Unigene21307_All	0.321928	-0.0978462
Unigene13013_All	-0.286302	-0.145047
Unigene23282_All	-0.0144981	-0.207324
Unigene23042_All	0.505892	1.51053
Unigene1115_All	0.0285694	0.21428
Unigene18704_All	0.137503	-0.475421
Unigene23372_All	0.226508	-0.328186
Unigene18024_All	0.0565842	0.214827
Unigene8784_All	-0.152002	-0.344146
Unigene4134_All	-0.152002	-0.223632
Unigene23483_All	-0.217591	-0.495212
Unigene11403_All	0.0285694	-0.14233
Unigene610_All	-0.120299	-0.30407
Unigene13644_All	-0.168129	0.589104
Unigene37708_All	-0.599461	-0.394616
Unigene17621_All	-0.268818	0.113821
Unigene18624_All	-0.120299	0.371962
Unigene18625_All	-0.0291489	-0.087235
Unigene6589_All	-0.286302	0.0563412
Unigene13762_All	-0.0588983	0.030441
Unigene11443_All	-0.234465	-0.267171
Unigene23201_All	-0.0739984	0.00898218
Unigene26501_All	-0.321928	-0.138837
Unigene21052_All	-0.268818	-0.551352
Unigene11500_All	0.0285694	0.0378338
Unigene18108_All	0.238786	-0.10151
Unigene13990_All	0.0285694	0.000222893
Unigene11391_All	-0.0144981	-0.00556245
Unigene20818_All	-0.0739984	-0.404733
Unigene1289_All	-0.0892676	0.0615379
Unigene3841_All	0.042644	0.0734378
Unigene4163_All	0.0976115	-0.10367
Unigene18705_All	-0.0291489	-0.00678239
Unigene11386_All	-0.304009	0.0900139
Unigene16316_All	-0.18442	0.0783065
Unigene15171_All	0.189034	-0.0155701
Unigene18623_All	0.163499	0.398677
Unigene4403_All	-0.251543	0.0167018
Unigene8567_All	-0.104699	0.216586
Unigene8983_All	-0.168129	-0.0588381
Unigene16283_All	-0.104699	-0.59286
Unigene15883_All	-0.971428	-0.954286
Unigene15795_All	0.137503	-0.144982
Unigene19568_All	-0.0892676	-0.175204
Unigene20927_All	0.0840646	0.0954072
Unigene11473_All	0	-0.185363
Unigene6206_All	-0.0144981	-0.325732
Unigene21016_All	-0.395929	-1.29297
Unigene18679_All	0.124328	0.181189
Unigene16347_All	0.189034	-0.370736
Unigene23528_All	-0.0439464	-0.0176793
Unigene16066_All	0.0143553	-0.245149
Unigene13839_All	-0.18442	-0.311596
Unigene17783_All	-0.104699	-0.206809
Unigene26332_All	0.286881	-0.224487
Unigene8488_All	-0.104699	-0.408235
Unigene4165_All	0.367371	0.147525
Unigene29123_All	-0.666575	-0.394616
Unigene4452_All	-0.0439464	0.383088
Unigene9012_All	0.226508	-0.369775
Unigene15784_All	-0.0739984	0.27577
Unigene2962_All	-0.168129	-0.131121
Unigene20784_All	0.137503	-0.358768
Unigene13471_All	0.516015	-0.326735
Unigene22838_All	-0.556395	0.142001
Unigene23425_All	-0.18442	0.156314
Unigene8587_All	-0.200919	-0.38434
Unigene9048_All	-0.0588983	-0.373346
Unigene7959_All	0.176322	-0.345551
Unigene10848_All	0.163499	0.103845
Unigene16132_All	-0.0739984	-0.0463008
Unigene10878_All	-0.0739984	-0.0945215
Unigene26592_All	-0.251543	-0.15855
Unigene11401_All	0.0840646	-0.160748
Unigene22980_All	0.124328	-0.272976
Unigene22961_All	-0.0439464	-0.357683
Unigene734_All	-0.0291489	-0.391146
Unigene4360_All	-0.0739984	-0.274117
Unigene20902_All	-0.234465	0.0995591
Unigene11303_All	0.124328	0.189455
Unigene3394_All	-0.200919	-0.115993
Unigene11591_All	-0.0739984	0.0555779
Unigene11194_All	-0.0144981	-0.0340218
Unigene13962_All	-0.377068	-0.355671
Unigene11435_All	-0.13606	-0.120825
Unigene10993_All	-0.454028	-0.557774
Unigene20558_All	0.042644	-0.653434
Unigene19159_All	0.286881	0.163522
Unigene23386_All	-0.0439464	0.465097
Unigene20898_All	-0.120299	0.00689747
Unigene9099_All	-0.0588983	0.0524135
Unigene20077_All	-0.120299	-0.0130437
Unigene10564_All	0.111031	-0.875029
Unigene16355_All	0.782409	0.597846
Unigene1230_All	0.124328	0.112562
Unigene3393_All	-0.514572	0.687321
Unigene28999_All	-0.286302	-0.621324
Unigene20580_All	-0.0144981	-0.178996
Unigene6680_All	0.0703893	-0.181923
Unigene16114_All	0.042644	-0.316176
Unigene6636_All	0.0143553	0.190265
Unigene9303_All	0.0840646	-0.228953
Unigene16111_All	-0.18442	0.0846295
Unigene1002_All	0.464668	0.0308505
Unigene22320_All	-0.251543	-0.0374231
Unigene13689_All	0	-0.383495
Unigene13665_All	-0.0588983	-0.580978
Unigene20915_All	0.111031	0.0766314
Unigene9014_All	-0.0291489	-0.17316
Unigene13988_All	-0.104699	-0.00230137
Unigene8201_All	0.298659	-0.220473
Unigene10943_All	0.275008	-0.330132
Unigene21129_All	-0.104699	-0.104014
Unigene11379_All	-0.104699	-0.122387
Unigene13197_All	-0.18442	-1.20565
Unigene6839_All	-0.234465	0.164677
Unigene10689_All	0.226508	0.131886
Unigene592_All	-0.321928	-0.251782
Unigene22865_All	0	-0.618445
Unigene18739_All	-0.104699	-0.303428
Unigene20493_All	-0.120299	0.077973
Unigene13184_All	0.137503	-0.413934
Unigene6771_All	-0.268818	0.250048
Unigene15768_All	-0.0439464	-0.0143975
Unigene9045_All	-0.0144981	-0.695752
Unigene403_All	-0.234465	-0.189869
Unigene8762_All	0.0565842	-0.0792248
Unigene10772_All	-0.473932	-1.36143
Unigene23332_All	0	-0.199555
Unigene16156_All	0.0143553	0.014324
Unigene20883_All	0.0840646	-1.11103
Unigene1000_All	0.765535	1.01053
Unigene22956_All	0.0143553	-0.0823639
Unigene13830_All	-0.0739984	-0.050763
Unigene1354_All	0	0.123234
Unigene23392_All	-0.18442	-0.189193
Unigene18146_All	-0.0588983	-0.140068
Unigene3719_All	-0.0588983	-0.033473
Unigene1047_All	0.189034	-0.669959
Unigene9274_All	0.378511	-0.19058
Unigene11509_All	0.111031	-0.119211
Unigene21002_All	-0.104699	-0.27294
Unigene23391_All	-0.168129	0.0714618
Unigene8167_All	-0.18442	-0.432362
Unigene15462_All	-0.18442	-0.15744
Unigene23318_All	0.0703893	-0.0106742
Unigene8951_All	0.0976115	0.134909
Unigene3847_All	-0.321928	-0.932948
Unigene4159_All	-0.0739984	-0.890485
Unigene1261_All	-0.0739984	-0.0379781
Unigene3881_All	-0.434401	-0.301578
Unigene23560_All	-0.0439464	-0.731038
Unigene8189_All	0.111031	-0.0312151
Unigene6661_All	-0.0739984	0.156936
Unigene16081_All	0.0143553	-0.490867
Unigene6559_All	-0.0291489	-0.0182127
Unigene23436_All	-0.0439464	0.132381
Unigene34598_All	1.70044	0.595492
Unigene18904_All	-0.168129	0.13289
Unigene13240_All	-0.0892676	-0.273402
Unigene13818_All	-0.13606	-0.199266
Unigene6688_All	-0.57777	0.103749
Unigene12931_All	-0.0739984	0.409751
Unigene20258_All	1.0072	2.70514
Unigene16253_All	0.0565842	-0.344814
Unigene20843_All	0.0565842	0.0481289
Unigene9024_All	-0.268818	-0.106164
Unigene376_All	-0.217591	-0.0879552
Unigene17807_All	0.163499	-0.431246
Unigene15971_All	0.226508	0.0679079
Unigene13916_All	-0.286302	-0.13101
Unigene16274_All	-0.0739984	-0.278635
Unigene291_All	0.15056	-0.0502467
Unigene14038_All	-0.473932	0.140564
Unigene1186_All	0.422232	0.581916
Unigene13960_All	-0.200919	-0.214682
Unigene11017_All	-0.304009	0.00392093
Unigene11270_All	0.250962	-0.432612
Unigene16135_All	0.263035	0.0200555
Unigene13879_All	0.475086	-0.141834
Unigene23536_All	0	-0.118865
Unigene16395_All	-0.152002	0.77638
Unigene18603_All	-0.0144981	-0.112085
Unigene13926_All	-0.168129	0.0733807
Unigene33291_All	0.137503	0.489354
Unigene9104_All	-0.152002	0.004335
Unigene8828_All	-0.168129	-0.142405
Unigene1343_All	0.111031	-0.361491
Unigene20070_All	0.0840646	0.535362
Unigene16189_All	-0.152002	-0.069011
Unigene13930_All	-0.415034	0.0621754
Unigene8914_All	0.310339	-0.218388
Unigene12723_All	0	-0.0747015
Unigene788_All	-0.234465	0.157643
Unigene24382_All	0.367371	-0.66328
Unigene21031_All	-0.120299	-0.195449
Unigene6578_All	-0.0739984	-0.131418
Unigene22190_All	0	0.0408561
Unigene11671_All	0.124328	-0.0777725
Unigene15156_All	0.163499	1.77644
Unigene4220_All	0.310339	0.378684
Unigene5070_All	-0.0739984	-0.411295
Unigene20866_All	-0.0588983	0.0224896
Unigene20060_All	-0.321928	0.85049
Unigene16035_All	0.333423	-0.245806
Unigene8572_All	-0.286302	-2.42638
Unigene4275_All	-0.0892676	0.455239
Unigene6619_All	-0.234465	0.263045
Unigene18386_All	-0.168129	-0.427067
Unigene15385_All	0.0565842	-0.0765233
Unigene20509_All	-0.168129	0.170682
Unigene23450_All	-0.200919	0.0513138
Unigene23526_All	0.0976115	0.536556
Unigene10502_All	0.0143553	-0.207638
Unigene6716_All	0.201634	0.372575
Unigene1367_All	-0.0144981	0.122699
Unigene9003_All	-0.0291489	0.142597
Unigene23612_All	-0.200919	0.904017
Unigene3830_All	-0.286302	0.324936
Unigene23262_All	-0.0739984	0.437991
Unigene6474_All	-0.168129	0.170899
Unigene16313_All	-0.321928	-0.143196
Unigene14236_All	0.226508	0.60045
Unigene20270_All	0.0703893	0.00188078
Unigene8535_All	0.137503	-0.106367
Unigene18532_All	0.0285694	0.721939
Unigene23745_All	0.137503	-0.415617
Unigene21065_All	-0.268818	0.246013
Unigene4224_All	0.389566	3.18987
Unigene18665_All	-0.18442	-0.095972
Unigene20525_All	-0.0144981	-0.358482
Unigene14045_All	0.0565842	-0.600576
Unigene9114_All	0	-0.0214073
Unigene6149_All	-0.0892676	-0.625398
Unigene4312_All	0.042644	-0.117141
Unigene20578_All	-0.18442	0.368173
Unigene21054_All	-0.152002	-0.365736
Unigene9103_All	0.286881	-0.109617
Unigene1139_All	-0.200919	0.175828
Unigene1162_All	-0.377068	-0.171651
Unigene6604_All	0.124328	-0.0701141
Unigene6203_All	0.0565842	-0.107096
Unigene74_All	-0.268818	0.0518778
Unigene6706_All	-0.104699	0.0239417
Unigene11178_All	-0.251543	0.25942
Unigene15383_All	0.0840646	0.146351
Unigene6710_All	0.042644	-0.0519119
Unigene16118_All	0.0143553	-0.0803161
Unigene17585_All	-0.713115	-0.398741
Unigene22772_All	0.201634	-0.021
Unigene11015_All	0.0143553	-0.563566
Unigene11189_All	0.0565842	-0.441412
Unigene6713_All	-0.168129	-0.759821
Unigene8017_All	0.505892	-0.382771
Unigene6638_All	-0.535336	0.171107
Unigene18022_All	-0.0739984	-0.186525
Unigene16176_All	0.137503	0.272875
Unigene8712_All	0.344828	1.67082
Unigene6435_All	-0.415034	-0.486712
Unigene13193_All	-0.0439464	-0.19706
Unigene8972_All	-0.168129	-0.072765
Unigene9131_All	-0.152002	-0.28299
Unigene4299_All	0.0143553	-0.764484
Unigene18398_All	-0.200919	-0.302143
Unigene10264_All	-0.286302	0.184159
Unigene21105_All	0.0976115	0.107105
Unigene18519_All	-0.217591	-0.399203
Unigene6658_All	-0.286302	-0.193141
Unigene15997_All	-0.0892676	0.0304649
Unigene800_All	-0.454028	-0.29555
Unigene17934_All	-0.251543	-0.108658
Unigene1316_All	-0.0739984	-0.2819
Unigene6687_All	0.15056	0.104063
Unigene11536_All	-0.234465	-0.0455189
Unigene876_All	-0.0144981	0.148922
Unigene14202_All	-0.152002	3.26604
Unigene10988_All	0.214125	0.000339416
Unigene1302_All	0.263035	0.304331
Unigene4459_All	0.0285694	0.0988899
Unigene4364_All	0.367371	-0.345375
Unigene19796_All	0.298659	0.018032
Unigene6791_All	-0.0892676	0.0339023
Unigene6257_All	-0.0439464	0.0343773
Unigene17816_All	0.250962	-0.609745
Unigene18609_All	-0.251543	0.0620371
Unigene1196_All	-0.18442	-0.22846
Unigene22954_All	-0.494108	-0.0880154
Unigene13938_All	-0.18442	0.376329
Unigene6599_All	-0.13606	-0.111338
Unigene16502_All	-0.395929	0.609387
Unigene6820_All	-0.395929	-0.485565
Unigene9000_All	0.176322	-0.241895
Unigene13958_All	-0.152002	-0.106002
Unigene460_All	-0.434401	0.116114
Unigene16125_All	0.15056	0.0500359
Unigene4214_All	0.0976115	-0.263833
Unigene20431_All	-0.0291489	-0.803004
Unigene1144_All	0.189034	0.244086
Unigene18570_All	-0.120299	-0.33234
Unigene16306_All	-0.120299	0.126196
Unigene13774_All	-0.200919	-0.0613739
Unigene11498_All	0.042644	-0.384345
Unigene10875_All	0.176322	-0.146081
Unigene6592_All	-0.0739984	-0.497032
Unigene16088_All	0.189034	-0.27329
Unigene11290_All	0.042644	0.429133
Unigene11432_All	-0.120299	-0.0709644
Unigene8324_All	-0.0439464	-0.0101076
Unigene5838_All	0.0143553	-2.56813
Unigene22716_All	-0.120299	0.0308998
Unigene13758_All	-0.0144981	-0.419946
Unigene4328_All	-0.0588983	-0.220927
Unigene9792_All	0.137503	0.410302
Unigene2170_All	0.238786	-0.0692415
Unigene18709_All	-0.200919	0.19975
Unigene4353_All	0.042644	-0.22993
Unigene10617_All	0.275008	-0.55757
Unigene13983_All	-0.120299	0.00905985
Unigene10734_All	-0.217591	-0.426455
Unigene11169_All	-0.268818	0.0571849
Unigene26167_All	0.0143553	-1.15997
Unigene18695_All	-0.217591	0.292555
Unigene8613_All	-0.0291489	-0.208831
Unigene13825_All	0.111031	0.145073
Unigene20907_All	-0.104699	-0.454776
Unigene834_All	-0.251543	0.18295
Unigene1132_All	0.0840646	-0.339415
Unigene18139_All	-0.168129	0.125816
Unigene18369_All	-0.862495	0.160169
Unigene20508_All	0.344828	1.14703
Unigene9471_All	0.333423	0.261717
Unigene11429_All	-0.0439464	-0.119833
Unigene26660_All	-0.18442	0.241018
Unigene15770_All	0.163499	0.179004
Unigene11505_All	0.0565842	-0.140593
Unigene23267_All	-0.0144981	-0.217287
Unigene1247_All	-0.18442	-0.205285
Unigene8281_All	-0.0588983	-0.24862
Unigene6821_All	-0.234465	-0.151773
Unigene4323_All	-0.200919	0.0435644
Unigene13770_All	0.15056	-0.236147
Unigene5812_All	-0.0291489	-0.172066
Unigene20870_All	0.137503	0.00658242
Unigene12955_All	-0.0892676	-0.0599903
Unigene16091_All	0.0840646	-0.614497
Unigene13975_All	-0.57777	-1.11426
Unigene23322_All	0	-0.0212665
Unigene11606_All	-0.217591	0.0875741
Unigene3705_All	-0.321928	-0.0854728
Unigene143_All	-0.304009	-0.23245
Unigene18132_All	-0.0291489	0.00461958
Unigene9055_All	0.0143553	-0.263624
Unigene22725_All	-1.12029	-2.37258
Unigene18038_All	0.124328	0.128029
Unigene18613_All	0.0565842	0.0447945
Unigene11607_All	0.124328	0.161878
Unigene4573_All	-0.217591	-0.386116
Unigene851_All	-0.0144981	-0.182843
Unigene15323_All	-0.286302	0.026474
Unigene8452_All	-0.0144981	0.182193
Unigene11370_All	-0.785877	0.0162972
Unigene21278_All	0.042644	-0.0753904
Unigene6728_All	-0.0892676	-0.0923
Unigene6202_All	-0.13606	0.113369
Unigene18682_All	-0.13606	-0.713422
Unigene18507_All	-0.18442	-0.124865
Unigene26560_All	-0.377068	3.75479
Unigene1362_All	-0.0739984	-0.178179
Unigene11566_All	-0.0892676	0.150402
Unigene50_All	0.042644	-1.49309
Unigene11506_All	0.042644	-0.0480268
Unigene15535_All	-0.13606	-0.0148349
Unigene4845_All	0.464668	1.20053
Unigene16311_All	-0.340072	-0.153343
Unigene4212_All	-0.0739984	-0.527465
Unigene13483_All	-0.304009	0.33127
Unigene16107_All	-0.200919	-0.14543
Unigene1283_All	-0.0439464	0.0701742
Unigene20175_All	-0.234465	-0.205274
Unigene16305_All	-0.0739984	-0.566367
Unigene11445_All	0.0285694	0.0795276
Unigene4101_All	-0.18442	-0.19594
Unigene4379_All	-0.200919	0.239298
Unigene11321_All	0.0976115	-0.185929
Unigene18175_All	0.042644	-0.148028
Unigene4344_All	0.739849	-0.784147
Unigene13895_All	-0.168129	-0.310325
Unigene13890_All	-0.168129	-0.175523
Unigene18628_All	-0.217591	0.156451
Unigene23384_All	1.08406	-1.18234
Unigene21389_All	-0.0588983	0.0910639
Unigene18677_All	-0.234465	-0.591103
Unigene5137_All	-0.0144981	0.204297
Unigene4303_All	-0.0439464	0.103164
Unigene6709_All	-0.0739984	0.169327
Unigene6475_All	-0.0588983	0.159507
Unigene13144_All	0.0565842	-0.594545
Unigene6586_All	-0.234465	0.193042
Unigene20847_All	-0.13606	-0.349602
Unigene22649_All	0.238786	-0.210867
Unigene8367_All	-0.104699	-0.043993
Unigene23452_All	-0.200919	-0.132652
Unigene16157_All	0.0143553	-0.210636
Unigene22_All	0.0840646	0.114388
Unigene16243_All	-0.0439464	-0.117714
Unigene8887_All	0.970854	-0.0690954
Unigene18744_All	-0.0892676	0.0271282
Unigene21088_All	-0.200919	-0.0110953
Unigene1140_All	0.632269	0.306377
Unigene6823_All	0.042644	-0.143237
Unigene4270_All	-0.0439464	-0.0302934
Unigene21127_All	-0.234465	-0.197851
Unigene11537_All	0.0840646	0.831477
Unigene16139_All	0.0976115	-0.0737948
Unigene3698_All	0.137503	-0.268641
Unigene18671_All	-0.251543	0.183126
Unigene6815_All	0.0703893	-0.018979
Unigene20541_All	0.0976115	-0.106212
Unigene9141_All	0.0565842	-0.224976
Unigene1034_All	0.163499	-0.185356
Unigene14300_All	0.411426	-1.15647
Unigene8900_All	-0.217591	0.310574
Unigene15783_All	-0.0144981	0.144747
Unigene492_All	-0.454028	0.0327558
Unigene6765_All	0.137503	-0.506352
Unigene1146_All	-0.0291489	-0.61107
Unigene23417_All	0.0840646	-0.480325
Unigene13652_All	0.189034	0.00660736
Unigene9005_All	0.15056	-0.18377
Unigene11292_All	0.124328	-0.0319486
Unigene15970_All	-0.18442	-0.0416711
Unigene21107_All	0.286881	0.158259
Unigene8406_All	0.0703893	-0.427105
Unigene10858_All	0.344828	0.206858
Unigene23418_All	0.0565842	0.622502
Unigene11588_All	0	-0.0785543
Unigene16292_All	0.111031	0.301951
Unigene6148_All	0.163499	-0.790626
Unigene16240_All	-0.0892676	-0.260432
Unigene1202_All	0.275008	-0.273508
Unigene4194_All	-0.234465	0.0458041
Unigene20400_All	-0.13606	-0.470591
Unigene4302_All	0.333423	-0.830759
Unigene20823_All	-0.200919	0.179994
Unigene15950_All	-0.0144981	-0.218415
Unigene20890_All	-0.736968	-0.121027
Unigene13864_All	0.0143553	0.108147
Unigene16247_All	-0.104699	-0.0880473
Unigene20805_All	-0.13606	0.0967394
Unigene13801_All	-0.217591	-0.142852
Unigene11174_All	-0.666575	0.04839
Unigene15404_All	-0.268818	-0.204771
Unigene21029_All	0.411426	0.295127
Unigene5725_All	0.189034	0.221605
Unigene23517_All	0.15056	0.212277
Unigene8994_All	-0.0588983	-0.201659
Unigene13921_All	0.111031	-0.388366
Unigene3458_All	0.238786	-0.471203
Unigene18595_All	0.0976115	0.00268906
Unigene11195_All	0.0565842	-0.0929919
Unigene13980_All	0.0703893	0.0973516
Unigene10889_All	-0.0291489	0.460306
Unigene14053_All	-0.321928	-0.231788
Unigene8926_All	0.0143553	-0.833188
Unigene11515_All	-0.0588983	-0.148222
Unigene8901_All	-0.200919	-0.436192
Unigene14059_All	-0.200919	0.589499
Unigene15536_All	0.0703893	0.063557
Unigene31006_All	0.575312	0.193655
Unigene16722_All	-0.168129	0.577467
Unigene576_All	-0.0439464	-0.360318
Unigene2704_All	-0.200919	-0.139407
Unigene18696_All	-0.0892676	-0.129905
Unigene25063_All	-0.0739984	0.297451
Unigene29126_All	0.0565842	0.0357155
Unigene20134_All	0.0565842	0.0527614
Unigene9105_All	-0.304009	-0.154814
Unigene11593_All	0.111031	0.0838192
Unigene13296_All	0.0143553	0.202219
Unigene20967_All	-0.104699	0.239836
Unigene463_All	0	0.200164
Unigene13925_All	-0.200919	-0.124838
Unigene23329_All	-0.13606	0.0124687
Unigene6760_All	-0.13606	0.00373001
Unigene6217_All	0.0840646	-0.126798
Unigene804_All	-0.0588983	-0.198134
Unigene1257_All	-0.104699	-0.550247
Unigene8998_All	-0.104699	0.0537033
Unigene20864_All	0.042644	0.000653916
Unigene22584_All	0.454176	0.672546
Unigene21117_All	0.0285694	0.250198
Unigene5891_All	-0.535336	1.23729
Unigene9047_All	-0.168129	-0.0679186
Unigene13906_All	-0.0892676	-0.101433
Unigene18607_All	0.367371	0.392268
Unigene13956_All	-0.0291489	-0.135287
Unigene22692_All	-0.321928	0.367207
Unigene6632_All	-0.217591	-0.0649883
Unigene15361_All	0.137503	-0.0472055
Unigene6621_All	0.163499	0.249173
Unigene1141_All	-0.120299	-0.333559
Unigene23437_All	-0.321928	-0.174833
Unigene841_All	-0.18442	0.257409
Unigene21097_All	-0.535336	-0.58782
Unigene6031_All	-0.494108	-0.0956873
Unigene4319_All	-0.358453	-0.365173
Unigene17787_All	0.176322	-0.831581
Unigene9009_All	0.137503	0.0553217
Unigene2674_All	-0.434401	0.0581047
Unigene23416_All	-0.217591	0.252394
Unigene9060_All	0.042644	0.614901
Unigene11324_All	-0.268818	-0.307615
Unigene9151_All	-0.104699	-0.299849
Unigene15289_All	-0.810969	-0.754168
Unigene3753_All	0.042644	-0.444632
Unigene23371_All	-0.104699	0.175395
Unigene18689_All	0.389566	-0.607749
Unigene16866_All	-0.200919	0.196643
Unigene4368_All	0.15056	-0.0478182
Unigene10882_All	0.0565842	0.174045
Unigene8929_All	0.0976115	-0.342199
Unigene11187_All	0.15056	0.0708843
Unigene18413_All	-0.286302	0.239084
Unigene1262_All	-0.120299	-0.168611
Unigene8780_All	-0.358453	-0.13513
Unigene18178_All	0.0976115	0.263252
Unigene3812_All	-0.0739984	-0.475076
Unigene11438_All	0.042644	-0.30502
Unigene16119_All	0.042644	-0.210005
Unigene7899_All	-1.47393	-0.0902093
Unigene13771_All	-0.0439464	0.0664953
Unigene16371_All	-0.0144981	-0.512241
Unigene11400_All	-0.13606	-0.208781
Unigene13950_All	-0.200919	-0.249629
Unigene6562_All	-0.168129	-0.221014
Unigene8852_All	-1.08927	-1.15611
Unigene20993_All	0.15056	-0.154036
Unigene13489_All	0.163499	-0.715093
Unigene20498_All	0.298659	-1.1065
Unigene18601_All	-0.120299	-0.461915
Unigene1269_All	0.555816	0.470004
Unigene9146_All	0	-0.171155
Unigene6746_All	-0.304009	-0.242707
Unigene10893_All	0.0143553	0.150023
Unigene4314_All	0.0285694	0.24089
Unigene17925_All	-0.340072	0.0066365
Unigene18510_All	-0.0144981	-0.0445758
Unigene4320_All	-0.0739984	0.113932
Unigene13369_All	0	-0.559078
Unigene9110_All	-0.234465	-0.340181
Unigene12849_All	0.263035	0.139006
Unigene23525_All	0.137503	-0.00124698
Unigene11417_All	0.0565842	-0.174897
Unigene16341_All	-0.104699	-0.0046817
Unigene22548_All	-0.415034	0.135468
Unigene18514_All	-0.168129	-0.020345
Unigene7993_All	0.344828	-0.723258
Unigene9152_All	0.137503	-0.409474
Unigene16147_All	-0.268818	-0.637478
Unigene36726_All	-0.152002	-0.588169
Unigene23309_All	-0.0439464	-0.291712
Unigene5744_All	-0.434401	0.389442
Unigene8890_All	-0.234465	-0.116129
Unigene20833_All	-0.13606	0.0235669
Unigene14016_All	0.214125	-0.237814
Unigene20223_All	-0.13606	0.378405
Unigene6670_All	-0.234465	-0.181564
Unigene3819_All	0.310339	-0.936934
Unigene18465_All	0.0703893	0.0788214
Unigene8429_All	-0.0144981	-0.0365721
Unigene23154_All	-0.0144981	0.152151
Unigene6571_All	-0.0892676	-0.113073
Unigene20968_All	-0.104699	-0.28989
Unigene11564_All	-0.152002	0.00812242
Unigene13011_All	0.0565842	0.802267
Unigene4234_All	0.15056	-0.281046
Unigene22430_All	-0.168129	0.238674
Unigene9057_All	-0.0739984	-0.432281
Unigene9816_All	0	0.143663
Unigene11582_All	0.137503	-0.256829
Unigene23390_All	-0.217591	-0.256419
Unigene20999_All	-0.0892676	-0.906971
Unigene11434_All	0.137503	-0.955945
Unigene13454_All	-0.0144981	-0.0148344
Unigene11329_All	0.263035	-0.232172
Unigene23158_All	-0.217591	-0.0995502
Unigene9133_All	-0.0892676	-0.162711
Unigene13964_All	0.422232	-0.103972
Unigene490_All	0.310339	-0.0734888
Unigene13634_All	-0.120299	-0.423263
Unigene16238_All	-0.286302	-0.20442
Unigene22966_All	0.0143553	-0.0968554
Unigene449_All	-0.556395	0.0604172
Unigene24691_All	0.226508	2.19652
Unigene21141_All	-0.358453	-0.197737
Unigene888_All	0	0.167238
Unigene9113_All	-0.251543	-0.288578
Unigene23264_All	-0.104699	-0.174689
Unigene5699_All	-0.0291489	0.232315
Unigene23374_All	-0.120299	-0.0312344
Unigene20562_All	0.163499	-0.103014
Unigene18627_All	-0.104699	0.151952
Unigene10978_All	-0.836498	-0.944014
Unigene13737_All	0.0840646	-0.326013
Unigene13328_All	0.250962	0.238969
Unigene16133_All	-0.120299	0.242777
Unigene11597_All	0.0143553	-0.0687627
Unigene1232_All	0.275008	-0.353608
Unigene3827_All	-0.395929	-0.221089
Unigene21962_All	0	0.517315
Unigene15672_All	-0.13606	-0.15219
Unigene22813_All	0.310339	0.209752
Unigene2191_All	-0.168129	0.36519
Unigene21081_All	0.0285694	0.944369
Unigene4034_All	-0.120299	0.217773
Unigene23453_All	-0.120299	0.164618
Unigene16252_All	-0.234465	-0.125846
Unigene22846_All	0.0703893	0.345194
Unigene4261_All	-0.0892676	-0.262003
Unigene13866_All	0.201634	-0.225374
Unigene13359_All	0.163499	-0.205952
Unigene15573_All	0.15056	-3.343
Unigene23168_All	0.226508	1.94831
Unigene4426_All	0.137503	0.0291217
Unigene349_All	-0.152002	0.053104
Unigene9160_All	-0.621487	-0.0437075
Unigene16079_All	-0.234465	-0.293866
Unigene10540_All	0.189034	0.0585166
Unigene13280_All	0.0976115	0.0106315
Unigene18358_All	-0.514572	0.482023
Unigene22783_All	-0.168129	-0.252396
Unigene3953_All	-0.0144981	-0.0315157
Unigene13455_All	-0.152002	0.133556
Unigene14000_All	0.163499	-0.129113
Unigene13813_All	-0.152002	-0.167983
Unigene18675_All	0.275008	0.256483
Unigene6792_All	-0.104699	-0.155226
Unigene13799_All	-0.120299	-0.121997
Unigene14377_All	0.189034	0.910643
Unigene18540_All	0.0703893	0.00202803
Unigene22346_All	0.137503	0.276496
Unigene5888_All	-0.0739984	-0.363624
Unigene21108_All	-0.0588983	-0.290998
Unigene14004_All	-0.120299	-1.08063
Unigene22714_All	-0.13606	-0.744695
Unigene15540_All	-0.454028	0.0600966
Unigene1122_All	0.0976115	-0.15512
Unigene1259_All	-0.377068	-0.30667
Unigene10615_All	0.0285694	-0.193444
Unigene4066_All	-0.104699	0.00510959
Unigene12782_All	-0.13606	-0.0610584
Unigene779_All	-0.599461	-0.355994
Unigene8952_All	-0.268818	-0.0710342
Unigene1147_All	0.0285694	0.0227526
Unigene4288_All	0.0565842	-0.186592
Unigene13775_All	-0.0588983	-0.330434
Unigene13826_All	0.250962	-1.15691
Unigene18055_All	-0.200919	0.0759273
Unigene20876_All	-0.268818	0.1234
Unigene11540_All	0.137503	-0.153114
Unigene21125_All	0.0840646	-0.0150922
Unigene3411_All	-0.13606	-0.293138
Unigene21101_All	-0.120299	0.942446
Unigene1327_All	-0.286302	0.0897941
Unigene650_All	0.807354	-0.571011
Unigene22878_All	-0.217591	-0.669223
Unigene20904_All	-0.0892676	0.0185256
Unigene8461_All	-0.0291489	-0.151119
Unigene18158_All	-0.0892676	0.335829
Unigene5672_All	-0.200919	-0.192736
Unigene6763_All	0.137503	-0.0916521
Unigene4036_All	-0.358453	-1.73055
Unigene18949_All	-0.395929	-0.187049
Unigene11550_All	-0.104699	-0.274402
Unigene18208_All	-0.168129	-0.327055
Unigene1372_All	-0.0892676	-0.365457
Unigene20873_All	0.0285694	0.0556202
Unigene21008_All	-0.217591	-0.0701038
Unigene21033_All	0.124328	0.0223407
Unigene1200_All	0	-0.282089
Unigene624_All	0.15056	2.18669
Unigene5942_All	0.0143553	0.513889
Unigene21036_All	-0.251543	0.0515612
Unigene4339_All	0.0976115	-0.188715
Unigene8494_All	-0.217591	0.032515
Unigene20417_All	-0.0739984	-0.256924
Unigene21106_All	0.0840646	-0.476459
Unigene9115_All	-0.0144981	0.241059
Unigene14008_All	-0.234465	0.00525587
Unigene3725_All	0.263035	0.344174
Unigene3755_All	-0.120299	0.0222672
Unigene11364_All	0.275008	0.249049
Unigene13912_All	-0.0739984	-0.0492811
Unigene4259_All	-0.0439464	0.0598893
Unigene18708_All	-0.454028	0.245162
Unigene16150_All	-0.152002	0.0614283
Unigene17723_All	0.275008	3.82069
Unigene799_All	-0.0439464	-0.0992609
Unigene20573_All	-0.268818	-0.682244
Unigene21039_All	0.0565842	0.293218
Unigene16270_All	-0.494108	-0.413593
Unigene6835_All	-0.0588983	-0.168318
Unigene20045_All	-0.0291489	0.817507
Unigene16288_All	-0.18442	0.0146803
Unigene10233_All	-0.0588983	0.10927
Unigene4380_All	-0.18442	-0.0381989
Unigene13886_All	-0.395929	-0.143774
Unigene13789_All	-0.120299	0.279929
Unigene18159_All	-0.234465	0.0782591
Unigene4266_All	-0.666575	-0.305856
Unigene13181_All	0.042644	0.286327
Unigene3506_All	-0.120299	-0.147895
Unigene473_All	0	2.36268
Unigene18714_All	0.201634	-0.0198564
Unigene18504_All	0.163499	0.0956586
Unigene11499_All	-0.434401	-0.023571
Unigene18197_All	0.0285694	-0.239294
Unigene18147_All	-0.104699	0.137819
Unigene8616_All	-0.0739984	0.479735
Unigene17117_All	0.0976115	-0.224487
Unigene13904_All	-0.18442	0.0538134
Unigene13883_All	0.15056	-0.164681
Unigene21143_All	-0.454028	-1.77828
Unigene23349_All	-0.0588983	-0.0932406
Unigene23361_All	-0.18442	-0.393726
Unigene18716_All	-0.251543	0.279198
Unigene1130_All	0.15056	-0.0590355
Unigene16145_All	0.0143553	0.0530237
Unigene20977_All	0.0143553	0.18453
Unigene22940_All	-0.152002	0.000612733
Unigene13673_All	-0.104699	-0.274934
Unigene21037_All	-0.104699	-0.342258
Unigene20867_All	-0.0892676	-0.230685
Unigene29087_All	-0.473932	-0.168635
Unigene13915_All	0.275008	0.0211477
Unigene13884_All	-0.251543	-0.263213
Unigene11387_All	0.722465	0.381145
Unigene11221_All	-0.340072	-0.341003
Unigene19341_All	0	-0.37688
Unigene14009_All	-0.251543	-0.0918201
Unigene9010_All	0.275008	0.0374815
Unigene18561_All	-0.0439464	-0.0583249
Unigene9068_All	0.0703893	-0.0512404
Unigene18119_All	-0.0439464	0.0697284
Unigene6576_All	-0.200919	-0.253165
Unigene11991_All	0.765535	0.0687772
Unigene10964_All	0.0703893	-0.429466
Unigene23126_All	0.0565842	-0.13183
Unigene13978_All	0.367371	0.0510978
Unigene6663_All	0.0143553	-0.0150603
Unigene20963_All	0	-0.146823
Unigene11343_All	-0.234465	-0.554875
Unigene18211_All	-0.0144981	-0.317351
Unigene20920_All	0	0.0780679
Unigene502_All	-0.473932	0.388989
Unigene24417_All	0.565596	0.196721
Unigene8884_All	-0.0291489	-0.433523
Unigene20945_All	0.250962	-2.53095
Unigene23162_All	0.111031	0.0590371
Unigene1378_All	0.0285694	-0.216553
Unigene17836_All	0.0840646	-0.337798
Unigene9119_All	-0.0588983	-0.106194
Unigene4388_All	-0.104699	-0.428886
Unigene16060_All	0.0840646	-0.045701
Unigene6133_All	0.124328	-0.186818
Unigene4430_All	0.0565842	0.115082
Unigene4460_All	-0.340072	0.501262
Unigene20474_All	0.189034	0.194128
Unigene20775_All	0.176322	0.0372881
Unigene825_All	0.0976115	-0.810457
Unigene6757_All	-0.0144981	-0.240454
Unigene18140_All	0.321928	0.19067
Unigene11245_All	0.0703893	1.16504
Unigene17958_All	0.0703893	-0.447723
Unigene13779_All	-0.0588983	-0.119598
Unigene3855_All	0	-0.189053
Unigene1108_All	-0.395929	-0.362855
Unigene20887_All	-0.0144981	0.31666
Unigene13973_All	-0.304009	-0.129953
Unigene829_All	0.0565842	0.0140353
Unigene6038_All	-0.0588983	0.126758
Unigene20899_All	0.310339	-0.361153
Unigene20483_All	-0.168129	-0.401814
Unigene3448_All	-0.18442	-0.0734835
Unigene14014_All	0.042644	-0.100522
Unigene14011_All	0.214125	-0.0377106
Unigene18572_All	0.0143553	-0.625834
Unigene18588_All	-0.120299	-0.399369
Unigene8774_All	0.432959	0.141746
Unigene6143_All	0.650764	2.99624
Unigene16148_All	-0.0588983	-0.310333
Unigene11414_All	-0.358453	-0.210538
Unigene14026_All	0.042644	-0.182659
Unigene11475_All	-0.152002	0.00364731
Unigene8145_All	-0.234465	-0.208174
Unigene16167_All	0.0840646	-0.256235
Unigene8265_All	-0.395929	-0.19077
Unigene8958_All	0.0143553	-0.00936108
Unigene6208_All	-0.13606	0.0903216
Unigene14199_All	0	4.78189
Unigene11_All	-0.217591	0.80061
Unigene6649_All	-0.200919	0.0507806
Unigene18703_All	-0.494108	0.0850198
Unigene6331_All	-0.57777	-0.339624
Unigene22679_All	-0.104699	-0.37135
Unigene8935_All	0.042644	0.0974308
Unigene9076_All	-0.473932	-0.361677
Unigene13977_All	0.15056	-0.033307
Unigene6515_All	0.344828	-0.544363
Unigene8851_All	0.0565842	0.0907553
Unigene1227_All	0.344828	-0.32734
Unigene6801_All	-0.0892676	-0.146736
Unigene8908_All	-0.251543	-0.0893009
Unigene1184_All	-0.0739984	0.271995
Unigene3889_All	-0.152002	-1.65941
Unigene22329_All	0.163499	-0.983075
Unigene21349_All	0.389566	-0.187271
Unigene10702_All	-0.666575	-2.96544
Unigene13390_All	-0.0588983	0.22459
Unigene10972_All	0.176322	-0.076709
Unigene14056_All	0.226508	-0.138587
Unigene21142_All	-0.0144981	0.0563857
Unigene18186_All	-0.286302	-0.316556
Unigene11316_All	0.0285694	0.00315636
Unigene1033_All	-0.358453	-1.5108
Unigene20601_All	-0.268818	0.643087
Unigene10737_All	0.0703893	0.249036
Unigene23285_All	0.214125	0.00591662
Unigene23457_All	0.124328	0.0470137
Unigene23426_All	-0.0588983	-0.0569878
Unigene15961_All	0.163499	-0.038931
Unigene7026_All	0.0565842	-2.18292
Unigene16170_All	0.163499	-0.0275087
Unigene13911_All	-0.0291489	-0.126798
Unigene18560_All	-0.0892676	0.272295
Unigene15228_All	-0.168129	-0.620432
Unigene13881_All	-0.168129	0.14391
Unigene6755_All	-0.0892676	-0.414792
Unigene16064_All	-0.13606	-0.108627
Unigene17504_All	-0.268818	-0.241683
Unigene10598_All	-0.18442	0.0336687
Unigene18724_All	0.124328	-0.416582
Unigene3834_All	-0.251543	0.0667407
Unigene453_All	-0.152002	0.0828957
Unigene16307_All	0.0143553	-0.236426
Unigene22784_All	-0.168129	0.0649599
Unigene13433_All	-0.0291489	-0.00188971
Unigene3694_All	-0.0291489	-0.496535
Unigene18487_All	0.298659	-0.293417
Unigene11575_All	-0.0739984	-0.224933
Unigene18770_All	-0.168129	0.0560313
Unigene11322_All	-0.234465	0.175558
Unigene3742_All	-0.217591	-0.172106
Unigene1238_All	-0.251543	-0.157598
Unigene17990_All	0.250962	0.118917
Unigene20765_All	-0.321928	0.406551
Unigene3338_All	-0.120299	-0.0727628
Unigene14071_All	0.250962	0.109648
Unigene1377_All	-0.268818	0.21134
Unigene10566_All	0.042644	-0.499104
Unigene20553_All	0.201634	0.077608
Unigene11306_All	-0.120299	0.283501
Unigene22743_All	-0.200919	-3.03162
Unigene13478_All	0.367371	-0.0377481
Unigene13420_All	0.275008	-1.32893
Unigene3575_All	-0.152002	0.240437
Unigene4455_All	0.0703893	0.177324
Unigene15742_All	-0.286302	0.0155744
Unigene6558_All	-0.251543	-0.368325
Unigene13972_All	0.0703893	0.043237
Unigene22780_All	0.042644	0.181495
Unigene6620_All	-0.152002	0.169849
Unigene21281_All	-0.0291489	-0.263076
Unigene21604_All	-0.152002	0.0325466
Unigene37024_All	0.0565842	-0.217021
Unigene996_All	-0.234465	0.189014
Unigene4363_All	-0.0892676	0.261751
Unigene20728_All	0.201634	-0.791624
Unigene15222_All	-0.0892676	0.349712
Unigene9121_All	0.176322	-0.131826
Unigene6693_All	-0.0439464	0.131905
Unigene18014_All	-0.395929	-0.194263
Unigene8495_All	0.0285694	-0.28573
Unigene13415_All	-0.0439464	0.157736
Unigene20484_All	-0.286302	-0.59122
Unigene17566_All	-0.168129	-0.0706661
Unigene16278_All	-0.0739984	-0.0872848
Unigene3398_All	-0.0892676	-0.702267
Unigene16360_All	0.163499	-0.152475
Unigene6633_All	-0.304009	-0.331098
Unigene3833_All	-0.268818	-0.904281
Unigene18378_All	0.111031	-0.305781
Unigene15120_All	-0.217591	-0.101234
Unigene23502_All	-0.0892676	-0.188877
Unigene177_All	0.887524	1.21712
Unigene4071_All	0.163499	0.0592076
Unigene23520_All	-0.0588983	-0.199179
Unigene6818_All	0.201634	-0.118272
Unigene21082_All	0.0703893	-0.0409271
Unigene13955_All	0.0840646	-0.0372536
Unigene18573_All	0.565596	-0.2901
Unigene22715_All	-0.377068	-4.05085
Unigene13442_All	0.042644	0.92185
Unigene11307_All	-0.0291489	-0.191156
Unigene9472_All	-0.0892676	0.351061
Unigene16295_All	0.0143553	0.101892
Unigene2350_All	0.0565842	0.0812971
Unigene17084_All	-1.2863	-0.714823
Unigene15607_All	-0.18442	-0.624471
Unigene6198_All	0.823749	0.552439
Unigene613_All	0.298659	-0.5026
Unigene37971_All	1.22651	-0.394887
Unigene8457_All	0.15056	-0.629526
Unigene23462_All	-0.0588983	-0.0221063
Unigene16325_All	0.0840646	0.0694273
Unigene15220_All	0.15056	0.0350609
Unigene10471_All	0.0840646	-0.0944842
Unigene217_All	-0.18442	0.00879793
Unigene20037_All	-0.120299	0.419282
Unigene16263_All	-0.234465	0.266715
Unigene6734_All	-0.0892676	-0.145844
Unigene14068_All	0.124328	0.486932
Unigene13769_All	0.378511	-0.164452
Unigene1215_All	0.0565842	0.00486563
Unigene13928_All	-0.0892676	0.286673
Unigene35714_All	0.111031	-0.705323
Unigene813_All	-0.0144981	-0.0760987
Unigene22902_All	-0.0892676	-0.250619
Unigene20854_All	-0.120299	-0.598481
Unigene11533_All	0.0703893	-0.405132
Unigene20889_All	0.310339	0.0868606
Unigene21274_All	0.250962	1.89514
Unigene21316_All	-0.18442	0.0483213
Unigene18191_All	0.0143553	-0.484752
Unigene13735_All	0.250962	0.193858
Unigene4300_All	0	-0.164529
Unigene8924_All	-0.104699	-0.208064
Unigene18353_All	0.0143553	-0.30203
Unigene6573_All	-0.0892676	0.134753
Unigene13085_All	0.124328	-0.609002
Unigene19973_All	0.15056	-1.14687
Unigene13773_All	-0.0439464	-0.0210798
Unigene8989_All	-0.0291489	-0.162837
Unigene5780_All	-0.234465	-0.439549
Unigene18587_All	-0.0739984	-0.212862
Unigene17777_All	-0.200919	0.171015
Unigene22923_All	0.0703893	-0.174489
Unigene18169_All	-0.234465	0.265701
Unigene34936_All	0.0285694	-0.379498
Unigene12780_All	-0.0739984	0.150662
Unigene16281_All	0.0703893	-0.0534249
Unigene17803_All	-0.395929	-0.548227
Unigene29970_All	0	0.0903721
Unigene20921_All	-0.18442	0.0870815
Unigene771_All	-0.104699	-0.00591349
Unigene21063_All	-0.0892676	0.156269
Unigene236_All	-0.340072	0.145334
Unigene18299_All	0.0703893	0.03609
Unigene4014_All	0	-0.125413
Unigene5691_All	-0.18442	0.423366
Unigene23446_All	-0.713115	-0.97779
Unigene18153_All	-0.0144981	0.0109492
Unigene15747_All	0.0976115	-0.592983
Unigene3880_All	-0.454028	-0.897203
Unigene23469_All	0.0565842	-0.320766
Unigene8964_All	-0.217591	0.0726838
Unigene6923_All	0	-0.294507
Unigene4444_All	-0.168129	-0.318456
Unigene11319_All	0.310339	-0.305524
Unigene11315_All	0.0840646	0.0380137
Unigene8018_All	1.44361	3.78977
Unigene18493_All	0.0840646	-0.378478
Unigene8772_All	-0.0892676	-0.0636853
Unigene15801_All	0.15056	0.0164548
Unigene6606_All	-0.18442	-0.0367994
Unigene13438_All	0.0143553	0.0173288
Unigene13944_All	0.0285694	0.287906
Unigene4397_All	-0.321928	0.737563
Unigene13162_All	0.124328	-0.265741
Unigene14073_All	-0.200919	0.232924
Unigene4583_All	-0.556395	-0.803102
Unigene2076_All	0.0840646	-0.0341814
Unigene20389_All	-0.234465	0.122075
Unigene8930_All	-0.304009	-1.46707
Unigene20583_All	0.545967	-0.313
Unigene381_All	-0.535336	-0.348187
Unigene23671_All	0.286881	-1.13447
Unigene6568_All	-0.473932	-0.214481
Unigene769_All	0.124328	0.000664979
Unigene15729_All	-0.0892676	-0.558933
Unigene23178_All	-0.454028	-0.32845
Unigene1194_All	-0.473932	-0.201667
Unigene23387_All	-0.104699	0.172683
Unigene15660_All	0.15056	0.157255
Unigene12259_All	0.250962	-0.0161077
Unigene20218_All	0.214125	-0.598998
Unigene5646_All	0.298659	-0.0364648
Unigene6594_All	0.0565842	-0.59218
Unigene9065_All	0.189034	-0.145072
Unigene4577_All	0.0143553	-0.377678
Unigene14361_All	-0.57777	2.32975
Unigene16128_All	0.111031	0.114039
Unigene21084_All	-0.286302	-0.246512
Unigene13763_All	0.124328	0.471575
Unigene6563_All	-0.120299	-0.0646304
Unigene13873_All	-0.0439464	-0.267661
Unigene18141_All	-0.268818	0.0794906
Unigene8947_All	-0.0144981	0.0799458
Unigene11289_All	-0.0588983	0.0307521
Unigene18757_All	0.632269	-0.79283
Unigene13447_All	0.201634	0.0246284
Unigene18565_All	-0.0588983	0.213427
Unigene20982_All	-0.268818	0.147031
Unigene18728_All	0.111031	0.245143
Unigene4458_All	0.15056	-0.134363
Unigene8561_All	-0.0588983	-0.673143
Unigene292_All	-0.0588983	0.416661
Unigene12481_All	-0.358453	-0.646696
Unigene6833_All	0.201634	-0.394157
Unigene4349_All	-0.0739984	0.00679223
Unigene23481_All	-0.286302	-0.566605
Unigene18389_All	0.275008	-0.228011
Unigene23308_All	-0.104699	0.0288968
Unigene22981_All	-0.0588983	0.0202063
Unigene11562_All	-0.18442	-0.487272
Unigene21011_All	0.0976115	-0.143082
Unigene16264_All	-0.0144981	-0.029358
Unigene4441_All	-0.395929	-0.025566
Unigene11528_All	0.15056	0.114576
Unigene9200_All	-0.621487	-0.145953
Unigene20282_All	0.0840646	-0.116082
Unigene32223_All	0.0143553	0.196721
Unigene8704_All	0.0703893	0.450694
Unigene4316_All	-0.0144981	-0.0694457
Unigene4309_All	-0.494108	-1.58119
Unigene15557_All	0.0143553	0.166361
Unigene16065_All	-0.168129	-0.641823
Unigene16308_All	0.042644	-0.329601
Unigene1266_All	0.0840646	-0.294294
Unigene18534_All	0.0703893	-0.426614
Unigene8810_All	-0.454028	0.491218
Unigene16152_All	0.0976115	0.0797506
Unigene4337_All	-0.0291489	-0.147956
Unigene20365_All	-0.434401	-0.178554
Unigene929_All	0.137503	0.188501
Unigene16348_All	0.0703893	0.0186169
Unigene9101_All	-0.104699	0.0787462
Unigene13934_All	0.0703893	-0.310719
Unigene18503_All	0.378511	0.72097
Unigene15680_All	-0.0739984	0.543384
Unigene22407_All	-0.217591	0.084863
Unigene6181_All	0.176322	-0.43816
Unigene2509_All	0.226508	-0.276505
Unigene21050_All	-0.434401	-0.105021
Unigene22645_All	0.298659	-0.378539
Unigene10608_All	-0.286302	0.949938
Unigene15661_All	0.137503	-0.180034
Unigene20318_All	-0.152002	-0.293691
Unigene8938_All	-0.18442	-0.149172
Unigene18223_All	0.0143553	-0.124533
Unigene3514_All	-0.168129	-0.142141
Unigene1207_All	-0.0439464	-0.21256
Unigene29830_All	0.0285694	0.193655
Unigene8771_All	-0.104699	0.133586
Unigene691_All	0.321928	0.017739
Unigene14055_All	-0.0439464	-0.0451908
Unigene8098_All	0.0703893	-0.439106
Unigene21086_All	-0.234465	-0.333821
Unigene13309_All	-0.268818	-0.194081
Unigene4265_All	-0.862495	-1.10463
Unigene16110_All	-0.0892676	0.125595
Unigene22527_All	0.310339	-0.545343
Unigene23299_All	0.137503	0.264135
Unigene3981_All	0.333423	2.83097
Unigene18717_All	0.042644	0.0722365
Unigene15710_All	-0.358453	-0.0931735
Unigene17668_All	0.0565842	-0.415108
Unigene16321_All	-0.152002	-0.317495
Unigene3572_All	-0.200919	-0.213599
Unigene21043_All	-0.0739984	-0.26007
Unigene18761_All	0.226508	0.650164
Unigene23472_All	0.0840646	-0.345978
Unigene13446_All	0.0285694	-0.0492868
Unigene4461_All	-0.268818	-0.234474
Unigene22941_All	0.0143553	0.164002
Unigene20742_All	0.62293	-0.0753713
Unigene23509_All	-0.168129	0.0597263
Unigene8936_All	0.15056	-0.459767
Unigene20537_All	-0.0144981	0.285862
Unigene10607_All	0.201634	0.0472765
Unigene4221_All	-0.0588983	0.0113389
Unigene1164_All	0.111031	-1.11173
Unigene6463_All	-0.13606	-0.310334
Unigene23265_All	-0.0739984	0.199573
Unigene13838_All	-0.18442	0.195979
Unigene1198_All	-0.13606	0.173356
Unigene23471_All	-0.0439464	-0.319541
Unigene6549_All	0.0565842	0.163782
Unigene11334_All	-0.168129	-0.0441993
Unigene6699_All	0.0143553	-0.116709
Unigene13392_All	-0.268818	-0.418523
Unigene23278_All	0.226508	-0.324257
Unigene34040_All	-0.234465	-0.187666
Unigene21025_All	0.0976115	-0.0450111
Unigene4289_All	0.0840646	0.00370159
Unigene9062_All	0.189034	-0.236573
Unigene21076_All	-0.18442	0.0616855
Unigene1177_All	-0.234465	-0.46752
Unigene23396_All	-0.120299	-0.277369
Unigene6601_All	-0.0291489	-0.117247
Unigene16131_All	-0.200919	-1.5062
Unigene10294_All	0.226508	0.692643
Unigene4352_All	-0.599461	-0.371334
Unigene18604_All	-0.152002	-0.101599
Unigene16155_All	-0.168129	-0.301144
Unigene16149_All	-0.0892676	-0.0831061
Unigene23337_All	-0.251543	-0.0533143
Unigene9026_All	0.286881	-0.0228288
Unigene16337_All	-0.13606	0.0706471
Unigene18094_All	-0.358453	-0.519866
Unigene17977_All	-0.434401	0.0531885
Unigene11532_All	-0.120299	0.000139466
Unigene1121_All	-0.0291489	-0.298827
Unigene13788_All	0.0703893	-0.00022975
Unigene5659_All	0	0.240611
Unigene11455_All	0.0143553	0.089784
Unigene23340_All	-0.304009	0.277375
Unigene24615_All	0.250962	-0.380712
Unigene13202_All	-0.514572	0.323639
Unigene13430_All	-0.286302	0.0217368
Unigene13243_All	0.201634	0.573924
Unigene16245_All	0.263035	-0.328575
Unigene20457_All	0.15056	-0.0140908
Unigene15774_All	-0.434401	0.127881
Unigene6310_All	-0.268818	0.458589
Unigene18129_All	0.0976115	-0.287234
Unigene18683_All	-0.13606	0.0457714
Unigene11338_All	-0.168129	0.181126
Unigene20897_All	-0.18442	-0.169546
Unigene6834_All	0.15056	0.0185608
Unigene36342_All	0.250962	-0.237308
Unigene1195_All	-0.535336	-0.130813
Unigene25248_All	1	-0.224487
Unigene4404_All	-0.304009	-0.270748
Unigene13856_All	-0.234465	-1.02127
Unigene1315_All	0	0.131987
Unigene8918_All	-0.200919	0.0807517
Unigene8928_All	0.176322	0.301505
Unigene1187_All	-0.761217	-0.383931
Unigene11484_All	-0.304009	-0.8536
Unigene8423_All	0.0976115	-0.30062
Unigene18701_All	-0.152002	0.261578
Unigene21051_All	-0.120299	-1.28542
Unigene6645_All	0.0703893	-0.270491
Unigene6239_All	-0.0144981	-0.535716
Unigene18676_All	-0.304009	0.0519803
Unigene23488_All	0.0143553	-0.233979
Unigene10913_All	0.0840646	-0.151567
Unigene17795_All	0.0285694	0.286377
Unigene15947_All	0.0976115	-0.328963
Unigene3856_All	0.124328	0.0915363
Unigene11485_All	0.111031	0.00671825
Unigene1356_All	0.0976115	-0.154378
Unigene7957_All	0.298659	-1.72397
Unigene6464_All	0.201634	-0.319969
Unigene20532_All	-0.0892676	-0.164892
Unigene18747_All	0.201634	-0.122039
Unigene13913_All	-0.104699	-0.113535
Unigene18546_All	-0.0439464	0.121866
Unigene10767_All	0.0840646	-0.213827
Unigene1035_All	0.163499	-0.697377
Unigene20877_All	0.250962	-0.394586
Unigene20244_All	-0.0588983	1.00601
Unigene23324_All	-0.104699	0.0815211
Unigene6786_All	0.344828	-0.275342
Unigene18702_All	0.238786	-0.00437311
Unigene20545_All	-0.217591	-0.250727
Unigene13787_All	0.0976115	-0.25678
Unigene11706_All	-0.251543	0.026608
Unigene1357_All	-0.217591	4.41724
Unigene4385_All	0.0285694	-0.0364256
Unigene23482_All	-0.0144981	-0.127861
Unigene1158_All	-0.0588983	-0.0428847
Unigene8600_All	0.0976115	0.117491
Unigene3122_All	-0.120299	0.213931
Unigene6091_All	0.0976115	0.140104
Unigene18692_All	0.0976115	-0.0173981
Unigene29072_All	-0.377068	-0.745918
Unigene6496_All	0.687061	0.0283903
Unigene13204_All	0.111031	-0.325592
Unigene8181_All	0.137503	-0.0508195
Unigene8443_All	-0.13606	-0.850465
Unigene8779_All	-0.200919	-0.0893477
Unigene1324_All	0.516015	1.42984
Unigene8892_All	-0.0892676	-0.0232739
Unigene6634_All	-0.0588983	0.041157
Unigene24663_All	0.0976115	-0.302781
Unigene13484_All	0	-0.572149
Unigene18765_All	-0.104699	-0.754598
Unigene23477_All	-0.234465	-0.0335825
Unigene13300_All	0.214125	0.209612
Unigene6546_All	-0.0892676	0.0735956
Unigene18328_All	0.422232	-0.0766157
Unigene22764_All	0.0143553	0.161275
Unigene16161_All	0.176322	-0.5776
Unigene28975_All	-0.104699	0.0109471
Unigene11218_All	0.111031	-0.799024
Unigene1175_All	0.0285694	-0.119493
Unigene6733_All	-0.0588983	-0.357626
Unigene3709_All	-0.152002	-0.149923
Unigene10961_All	-0.234465	0.179357
Unigene18600_All	0	-0.919477
Unigene10323_All	-0.13606	1.0045
Unigene21100_All	-0.0892676	0.136984
Unigene15407_All	-0.0439464	-0.0408741
Unigene8883_All	0.310339	0.174632
Unigene22322_All	-0.251543	0.05545
Unigene4358_All	-0.234465	-0.205076
Unigene20913_All	0.0143553	-0.59982
Unigene20065_All	0.189034	6.79874
Unigene1219_All	-0.18442	-0.303453
Unigene11446_All	-0.120299	-0.0463499
Unigene23326_All	0.0143553	-0.282749
Unigene6780_All	0.0285694	-0.0142647
Unigene22977_All	0.163499	0.173654
Unigene20983_All	0.0976115	-0.199323
Unigene21070_All	0.263035	-0.664089
Unigene20976_All	-0.0144981	0.138106
Unigene6272_All	-0.104699	-0.0552847
Unigene6570_All	-0.0739984	0.0586912
Unigene7320_All	0.0976115	-6.48031
Unigene6574_All	0	-0.0890365
Unigene1203_All	-0.621487	-0.253858
Unigene6651_All	-0.340072	-0.351583
Unigene16227_All	-0.0892676	-0.0168398
Unigene12899_All	-0.152002	0.389856
Unigene6450_All	0.575312	2.50046
Unigene21026_All	0.0703893	-0.406071
Unigene4203_All	0.226508	0.270671
Unigene4362_All	0.0976115	0.142091
Unigene9143_All	-0.0291489	-0.275439
Unigene17202_All	-0.13606	-0.417265
Unigene21032_All	0.485426	-0.192979
Unigene20992_All	-0.234465	0.0889934
Unigene11544_All	0.0143553	0.189588
Unigene18754_All	-0.286302	0.0564537
Unigene29663_All	-0.200919	0.182314
Unigene8880_All	-0.104699	0.313325
Unigene709_All	-0.0439464	0.0091319
Unigene17739_All	0	-0.358048
Unigene8950_All	-0.13606	0.0733253
Unigene11394_All	-0.321928	-0.0872717
Unigene18483_All	-0.0144981	-0.379559
Unigene6610_All	0.0840646	0.120102
Unigene16192_All	-0.120299	-0.122548
Unigene8420_All	0.0840646	-0.0487026
Unigene16190_All	-0.152002	0.165266
Unigene11542_All	0.176322	-0.114733
Unigene8988_All	0.0840646	0.0380504
Unigene3601_All	-0.13606	0.19291
Unigene4438_All	-0.152002	0.242037
Unigene3871_All	-0.395929	-0.142989
Unigene16061_All	0.0703893	-0.00176253
Unigene11411_All	-0.152002	-0.0484167
Unigene17767_All	-0.18442	0.054531
Unigene23404_All	-0.321928	0.298028
Unigene4782_All	-0.200919	-0.186206
Unigene11346_All	0.042644	-0.186427
Unigene5676_All	-0.621487	0.0477885
Unigene23165_All	-0.340072	-1.20423
Unigene18366_All	-0.0144981	-0.26154
Unigene11416_All	0.163499	0.0381368
Unigene21068_All	0.0976115	0.508836
Unigene3372_All	0.263035	0.592643
Unigene15656_All	0.575312	1.5828
Unigene6072_All	0.0285694	-0.246724
Unigene16001_All	-0.0739984	-0.576997
Unigene27404_All	-0.168129	0.127802
Unigene481_All	-0.0892676	-0.0576905
Unigene1111_All	0.042644	-0.0791238
Unigene8604_All	0.111031	-0.247078
Unigene13803_All	-0.0739984	-0.179772
Unigene1190_All	-0.18442	0.0133554
Unigene11598_All	-0.0291489	0.0595872
Unigene16151_All	-0.120299	0.161218
Unigene15439_All	0.333423	0.255408
Unigene6703_All	-0.304009	-0.408698
Unigene23400_All	-0.0144981	-0.0830365
Unigene6560_All	-0.0439464	-0.43438
Unigene15759_All	0.226508	0.24517
Unigene15169_All	0.214125	-0.0825815
Unigene8475_All	-0.0439464	-0.251993
Unigene18472_All	-0.152002	0.178432
Unigene21069_All	-0.18442	-0.120991
Unigene21012_All	-0.0588983	-0.089636
Unigene17863_All	-0.415034	-0.949413
Unigene21522_All	-0.286302	-0.520466
Unigene21109_All	-0.0439464	-0.40096
Unigene22918_All	-0.0739984	-0.136565
Unigene8921_All	-0.340072	0.0048196
Unigene13559_All	-0.13606	0.243995
Unigene6673_All	-0.377068	-0.412353
Unigene25511_All	0.250962	-0.352916
Unigene23458_All	0.0565842	0.306548
Unigene35599_All	-0.120299	-1.27558
Unigene11558_All	-0.104699	-0.204068
Unigene464_All	-0.104699	-0.545281
Unigene13365_All	-0.321928	-0.510656
Unigene18644_All	0.0840646	-0.150812
Unigene4170_All	-0.200919	0.0198414
Unigene20779_All	-0.0439464	-1.34112
Unigene11421_All	-0.104699	0.106536
Unigene1093_All	1.26903	1.71072
Unigene4301_All	0.042644	0.171356
Unigene18566_All	-0.0892676	-0.0416141
Unigene22316_All	0.0285694	-0.240065
Unigene22141_All	-0.321928	0.52972
Unigene1214_All	0.250962	-0.585003
Unigene9046_All	0.250962	-0.0401072
Unigene3805_All	0	0.105587
Unigene23503_All	-0.0291489	-0.0910777
Unigene6141_All	-0.286302	-0.384529
Unigene4147_All	-0.304009	-0.511463
Unigene19667_All	-0.0739984	1.10872
Unigene23273_All	0.042644	-0.0581067
Unigene13490_All	-0.358453	-0.165588
Unigene9142_All	-0.234465	-0.221688
Unigene16340_All	-0.200919	-0.069047
Unigene22903_All	-0.234465	-0.313651
Unigene22367_All	0.250962	0.690535
Unigene8946_All	-0.120299	-0.182855
Unigene15394_All	-0.0588983	0.236846
Unigene6461_All	0.201634	0.541923
Unigene9001_All	0.0285694	0.417657
Unigene16339_All	-0.454028	-1.18317
Unigene4073_All	0.0285694	0.0040732
Unigene16198_All	0.124328	-0.448957
Unigene23367_All	-0.0144981	-0.00705713
Unigene1279_All	0.263035	-0.0540655
Unigene22358_All	0.176322	-0.999792
Unigene11585_All	0.0143553	0.224284
Unigene18558_All	-0.104699	-0.21901
Unigene22682_All	-0.0739984	0.533786
Unigene12904_All	0	0.204984
Unigene20975_All	-0.0291489	-0.336032
Unigene14043_All	0.0976115	-0.233543
Unigene8544_All	-0.120299	0.310547
Unigene16181_All	-0.0892676	-0.00415566
Unigene9097_All	-0.340072	-0.051134
Unigene1380_All	-0.0291489	-0.225691
Unigene13189_All	0.333423	-0.504669
Unigene6623_All	0.137503	-0.182203
Unigene21116_All	0.042644	0.10801
Unigene4335_All	-0.395929	-0.186857
Unigene20745_All	0.454176	0.498609
Unigene22648_All	-0.152002	-0.0942847
Unigene4318_All	0.0976115	-0.0901441
Unigene23801_All	-0.0439464	0.333533
Unigene20969_All	0.0143553	-0.322552
Unigene11302_All	0.0840646	0.343937
Unigene4172_All	0.0703893	-0.580761
Unigene22916_All	0.0143553	-0.364243
Unigene20862_All	0.0285694	-0.159604
Unigene4263_All	-0.168129	0.0775443
Unigene662_All	0.344828	-0.722754
Unigene13821_All	0.0285694	0.149633
Unigene6015_All	-0.0291489	0.126052
Unigene13831_All	0.0143553	-0.264819
Unigene4168_All	0.0565842	-0.0638522
Unigene17762_All	-0.168129	0.0482441
Unigene18771_All	-0.217591	0.0367214
Unigene9021_All	0.111031	-0.236149
Unigene22391_All	-0.0739984	-0.9065
Unigene18634_All	0.0976115	-0.260396
Unigene9087_All	-0.13606	-0.106011
Unigene18654_All	0.0976115	-0.298536
Unigene4348_All	-0.217591	-0.135873
Unigene9090_All	0.111031	-0.142214
Unigene20973_All	-0.286302	-0.35699
Unigene29005_All	-0.152002	0.457798
Unigene10292_All	0.286881	0.0531736
Unigene20448_All	-0.152002	0.011895
Unigene8614_All	0.226508	0.0192555
Unigene20893_All	0	-0.331535
Unigene6212_All	-0.152002	-0.0903006
Unigene11512_All	-0.200919	0.1942
Unigene4390_All	0	0.0951371
Unigene3941_All	0.0143553	0.235814
Unigene9208_All	-0.234465	0.114467
Unigene23280_All	-0.415034	0.809847
Unigene6729_All	0.137503	0.216768
Unigene1503_All	0.0976115	0.509494
Unigene22979_All	0.0703893	-0.473732
Unigene6240_All	-0.268818	-0.892873
Unigene23225_All	-0.0739984	-0.483794
Unigene3839_All	-0.0588983	-0.114345
Unigene13396_All	-0.120299	0.0501148
Unigene13987_All	-0.200919	0.0731366
Unigene7964_All	-0.689657	-0.415559
Unigene3765_All	0.250962	0.224059
Unigene21077_All	0.0285694	-0.082373
Unigene27444_All	-0.340072	0.780409
Unigene11470_All	0.0840646	0.00465968
Unigene1178_All	0.0285694	-0.388795
Unigene4599_All	0.0976115	0.405196
Unigene959_All	-0.0439464	0.169639
Unigene4199_All	0.163499	0.0012396
Unigene23356_All	-0.268818	-0.145101
Unigene819_All	-0.0439464	0.536212
Unigene3870_All	0.214125	-0.274813
Unigene1128_All	-0.599461	-1.0736
Unigene23312_All	0.310339	-0.0201912
Unigene20835_All	-0.358453	-0.337353
Unigene11361_All	-0.0291489	0.0410461
Unigene4205_All	-0.0739984	0.0919298
Unigene6701_All	-0.0144981	-0.081905
Unigene17850_All	-0.321928	0.191189
Unigene1124_All	0.0565842	-0.163874
Unigene6697_All	-0.0892676	-0.0984185
Unigene6085_All	0.042644	0.00288367
Unigene10071_All	-0.104699	0.0950473
Unigene11422_All	0.201634	-0.236415
Unigene22807_All	0.0703893	0.375407
Unigene21083_All	-0.395929	0.0501287
Unigene17964_All	-0.514572	0.197781
Unigene23431_All	-0.217591	-0.22894
Unigene18137_All	-0.200919	-0.224037
Unigene23616_All	0.201634	-0.0119587
Unigene21093_All	0.176322	-0.404539
Unigene6838_All	-0.0144981	0.148196
Unigene15114_All	0.0976115	-0.655912
Unigene6577_All	0.0840646	0.217588
Unigene1361_All	-0.286302	-0.491438
Unigene16290_All	0.263035	0.125495
Unigene6554_All	-0.358453	-0.322884
Unigene3199_All	-0.0892676	-0.288915
Unigene13451_All	0.0285694	-0.459039
Unigene18690_All	-0.556395	-0.203037
Unigene1350_All	0.263035	-0.167817
Unigene1363_All	-0.0291489	0.50372
Unigene23307_All	-0.0439464	-0.453683
Unigene8882_All	0.201634	-0.0436135
Unigene1104_All	0.367371	-0.479096
Unigene6509_All	-0.358453	-0.289362
Unigene20946_All	-0.0739984	-0.936408
Unigene10799_All	-0.251543	-0.182702
Unigene6657_All	0.111031	-0.424175
Unigene8894_All	0.111031	0.193894
Unigene17655_All	-0.340072	0.498958
Unigene4184_All	0.356144	-0.0416414
Unigene1282_All	0.333423	-0.298913
Unigene15781_All	-0.217591	-0.420567
Unigene426_All	0.214125	1.00464
Unigene18563_All	0.163499	-0.684194
Unigene4447_All	0.286881	0.238722
Unigene6584_All	-0.268818	-0.25497
Unigene20648_All	-0.415034	-1.84747
Unigene16164_All	0.163499	0.10778
Unigene8551_All	-0.120299	-0.182387
Unigene13680_All	0.124328	0.190725
Unigene23344_All	-0.0588983	-0.338862
Unigene11389_All	-0.251543	-0.00237509
Unigene4298_All	-0.104699	0.118675
Unigene8481_All	0	-0.0805698
Unigene6742_All	-0.217591	-0.309389
Unigene820_All	0	-0.821332
Unigene16356_All	-0.0291489	-0.16514
Unigene8329_All	-0.152002	0.831327
Unigene1191_All	0.903039	3.75215
Unigene20958_All	0.214125	-0.317524
Unigene4747_All	-0.304009	-0.154795
Unigene4255_All	-0.0439464	-0.268594
Unigene22792_All	0.238786	-0.155523
Unigene10741_All	-0.18442	0.177277
Unigene8959_All	0.333423	-0.296122
Unigene1027_All	-0.234465	0.204976
Unigene23398_All	0.0285694	-0.514227
Unigene21034_All	0.189034	0.302105
Unigene18096_All	-0.0144981	-0.199518
Unigene9236_All	0.0285694	0.0742867
Unigene11406_All	-0.104699	-0.335502
Unigene8895_All	0.0143553	0.477763
Unigene12924_All	0.0976115	-1.36134
Unigene35999_All	-0.13606	-0.233569
Unigene21144_All	0.042644	-0.131618
Unigene200_All	0.613531	0.421028
Unigene18209_All	-0.120299	-0.142771
Unigene642_All	0.0703893	-0.28931
Unigene11021_All	-0.104699	-0.319251
Unigene6828_All	0.176322	-0.159786
Unigene8888_All	-0.0892676	-0.126063
Unigene23378_All	-0.377068	-0.224691
Unigene12993_All	0.0285694	-0.063509
Unigene13865_All	0.275008	-0.131758
Unigene840_All	-0.473932	-0.0135935
Unigene6671_All	0.594548	-0.134548
Unigene7928_All	0.201634	0.180926
Unigene1081_All	-0.358453	0.477488
Unigene29083_All	-0.321928	0.122935
Unigene15765_All	0.378511	0.0492873
Unigene4070_All	-0.535336	0.147127
Unigene18113_All	-0.454028	-0.223119
Unigene4136_All	0.0565842	-0.228513
Unigene23500_All	0.042644	-0.091001
Unigene3706_All	-0.0144981	-0.239382
Unigene13929_All	0.310339	0.0196886
Unigene1129_All	-0.0588983	-0.194284
Unigene15981_All	0.0840646	0.0839371
Unigene4420_All	-0.0588983	0.142713
Unigene4062_All	-0.0892676	-0.277978
Unigene23470_All	-0.321928	0.170664
Unigene16964_All	0.678072	-0.987827
Unigene13497_All	0.124328	0.124645
Unigene19012_All	-0.0439464	0.528106
Unigene18071_All	-0.251543	-0.382621
Unigene16153_All	-0.200919	0.0119851
Unigene21133_All	0.0703893	1.88609
Unigene4305_All	-0.234465	-0.0576277
Unigene18438_All	-0.0291489	-0.966346
Unigene1169_All	-0.152002	0.122085
Unigene16285_All	0	-0.302875
Unigene13469_All	-0.713115	-0.980689
Unigene22690_All	0.163499	-0.257475
Unigene17126_All	-0.57777	0.257808
Unigene16299_All	0.0976115	-0.851162
Unigene18477_All	0.378511	0.0741024
Unigene16067_All	0.201634	-0.323057
Unigene16275_All	-0.0739984	-0.244636
Unigene6727_All	0.0565842	-0.446775
Unigene21678_All	0.0840646	1.74825
Unigene16254_All	-0.168129	0.419867
Unigene14193_All	0.0976115	0.273694
Unigene13855_All	0.250962	0.367107
Unigene6442_All	0	0.00609679
Unigene18479_All	0	0.00858756
Unigene4495_All	0.15056	-0.105652
Unigene20936_All	0.0976115	-0.550537
Unigene787_All	-0.152002	0.143963
Unigene97_All	-0.18442	-0.218389
Unigene8042_All	0.0285694	0.401087
Unigene188_All	0.333423	0.465366
Unigene19976_All	-0.200919	0.222158
Unigene15802_All	0.0565842	-0.339495
Unigene20206_All	-0.234465	-0.465716
Unigene4445_All	-0.0439464	-0.0095722
Unigene18688_All	-0.152002	0.298589
Unigene20798_All	0.201634	-0.60884
Unigene14067_All	-0.0892676	0.209523
Unigene9653_All	0.0143553	0.715906
Unigene3997_All	0.333423	-0.0589797
Unigene29640_All	0.163499	0.780367
Unigene18196_All	0.356144	-0.233282
Unigene3811_All	-0.0291489	-1.59141
Unigene15448_All	0.0143553	0.252022
Unigene11062_All	-0.0291489	-0.000161953
Unigene26232_All	-0.321928	-0.217021
Unigene17973_All	0.0143553	-0.255354
Unigene6493_All	-0.120299	-0.311275
Unigene1258_All	0.887524	0.702772
Unigene13385_All	-0.0144981	0.492771
Unigene8065_All	0.0703893	0.93668
Unigene23133_All	-0.152002	-0.150988
Unigene18610_All	0	0.0845193
Unigene8607_All	-0.454028	-0.692638
Unigene3831_All	-0.104699	-0.169773
Unigene1346_All	0.176322	0.0224269
Unigene10962_All	-0.104699	1.47433
Unigene3363_All	-0.0588983	0.203619
Unigene15948_All	0.189034	-0.126656
Unigene8797_All	-0.340072	-0.264948
Unigene18729_All	-0.152002	-0.167903
Unigene4206_All	-0.286302	-0.121038
Unigene23506_All	-0.377068	0.208412
Unigene18554_All	-0.377068	-0.561709
Unigene6805_All	-0.0892676	-0.0654363
Unigene23428_All	0.0565842	-0.151972
Unigene8813_All	-0.168129	-0.0369287
Unigene6270_All	-0.120299	-0.178274
Unigene13760_All	-0.0144981	0.00876883
Unigene1159_All	0.0840646	-0.593443
Unigene5986_All	0.0143553	0.00700115
Unigene11580_All	0.0703893	0.0196276
Unigene8913_All	0.0565842	-0.0742846
Unigene1249_All	-0.0588983	0.287301
Unigene31967_All	-0.120299	0.513235
Unigene830_All	-0.0739984	-0.111516
Unigene18058_All	0.344828	0.864367
Unigene13985_All	0.0976115	0.2175
Unigene4389_All	0.286881	0.508467
Unigene785_All	0	-0.440931
Unigene20552_All	-0.286302	-0.00356757
Unigene842_All	-0.0291489	-0.110602
Unigene18484_All	-0.120299	-0.242196
Unigene1110_All	-0.120299	-0.062351
Unigene19866_All	-0.200919	0.384126
Unigene20858_All	-0.377068	-0.335025
Unigene16377_All	-0.18442	-0.160948
Unigene17825_All	-0.251543	-0.0598505
Unigene6655_All	0.0976115	0.202698
Unigene18165_All	0.042644	-0.0257439
Unigene23245_All	-0.0588983	0.339612
Unigene23311_All	-0.120299	-0.14187
Unigene8427_All	0.137503	-0.638508
Unigene4174_All	-0.0739984	0.0185719
Unigene18481_All	-0.304009	-0.283147
Unigene27353_All	0.344828	0.689792
Unigene6155_All	-0.152002	-0.105148
Unigene11356_All	0.0703893	0.0752938
Unigene18144_All	-0.556395	-0.0159984
Unigene21060_All	-0.104699	-0.0994502
Unigene14066_All	-0.0892676	-0.248632
Unigene8578_All	-0.104699	-0.241429
Unigene6572_All	-0.0892676	-0.0374456
Unigene6582_All	0	-0.0417065
Unigene1318_All	0.042644	0.0678488
Unigene11555_All	0.124328	-0.203092
Unigene4215_All	0.214125	-0.684455
Unigene6615_All	-0.943419	-0.456343
Unigene15333_All	0.333423	-0.203767
Unigene11486_All	0.0285694	0.0780377
Unigene4307_All	0.176322	-0.740933
Unigene13137_All	0.0285694	-0.716658
Unigene11001_All	0.226508	-0.0381781
Unigene13476_All	-0.13606	0.0260646
Unigene18411_All	0.0976115	0.410207
Unigene22919_All	-0.0739984	-0.161358
Unigene4043_All	-0.0739984	-0.461056
Unigene16097_All	-0.217591	-0.428687
Unigene22986_All	0.411426	0.24009
Unigene6482_All	0.52607	0.97194
Unigene6717_All	-0.152002	0.186289
Unigene10986_All	-0.0739984	-0.137904
Unigene11181_All	-0.415034	-0.0849967
Unigene20905_All	0.124328	-0.0261369
Unigene16260_All	-0.152002	-0.11549
Unigene4268_All	0.15056	0.627468
Unigene8865_All	0.111031	-0.441475
Unigene1236_All	-0.251543	-0.232575
Unigene6070_All	0.042644	-0.533203
Unigene23082_All	-0.13606	-0.24105
Unigene848_All	0.275008	-0.220833
Unigene15757_All	0.176322	0.0213637
Unigene13918_All	-0.0739984	-0.0246271
Unigene16053_All	-0.13606	-0.591126
Unigene3452_All	0.201634	0.17659
Unigene13849_All	0.0976115	-0.240868
Unigene15957_All	0.286881	-0.318979
Unigene4195_All	-0.0291489	-0.0924614
Unigene17831_All	-0.217591	-0.131863
Unigene17975_All	0.275008	-0.235391
Unigene4387_All	-0.286302	0.441842
Unigene23440_All	0.367371	0.165998
Unigene23321_All	-0.0739984	-0.698317
Unigene6590_All	0.565596	1.1085
Unigene15504_All	-0.494108	-0.192801
Unigene6267_All	0.0143553	-0.0914786
Unigene21000_All	0.0285694	-0.154585
Unigene6795_All	-0.736968	-0.218331
Unigene15306_All	-0.286302	-0.504391
Unigene904_All	-0.104699	0.377213
Unigene3496_All	0.111031	-0.179162
Unigene23529_All	0.15056	-0.0895743
Unigene4357_All	0.250962	-0.157509
Unigene17726_All	0.0840646	-0.825889
Unigene1358_All	-0.0144981	-0.0983232
Unigene11301_All	-0.0439464	-0.240362
Unigene8816_All	0.214125	-0.250204
Unigene17786_All	-0.494108	-0.193059
Unigene11543_All	0.0285694	0.0303569
Unigene6616_All	-0.473932	-0.654721
Unigene11574_All	-0.0144981	-0.141001
Unigene20534_All	0.201634	-0.705229
Unigene1080_All	-0.340072	0.0776314
Unigene23284_All	0.201634	-0.0686281
Unigene11482_All	0.263035	0.331286
Unigene1223_All	0.0976115	-0.0176599
Unigene4033_All	0.124328	0.0332839
Unigene6741_All	-0.104699	-0.594366
Unigene23266_All	-0.13606	-0.0996937
Unigene36276_All	-0.104699	-0.245064
Unigene6608_All	-0.168129	0.500278
Unigene8003_All	0	-0.131581
Unigene18693_All	-0.104699	-0.0624384
Unigene18711_All	-0.18442	-0.426418
Unigene9150_All	0.356144	0.121112
Unigene14037_All	-0.0588983	-0.160735
Unigene8038_All	-0.168129	-0.327397
Unigene14044_All	0.495695	-0.625305
Unigene16521_All	0.0143553	0.0301676
Unigene1280_All	0.238786	-0.268024
Unigene450_All	0.422232	-0.0739093
Unigene5850_All	0.275008	-0.110387
Unigene11018_All	0.189034	-0.721215
Unigene23310_All	0.0285694	0.0423319
Unigene23408_All	0.0703893	0.102975
Unigene6758_All	0.176322	1.4112
Unigene23394_All	0.250962	-0.95434
Unigene11339_All	0.226508	-0.18534
Unigene15753_All	0	-0.750311
Unigene8723_All	0.238786	-0.934798
Unigene11450_All	-0.268818	-0.158472
Unigene10919_All	0.0840646	-0.0821335
Unigene36321_All	0.0840646	-0.0916841
Unigene11397_All	0.163499	0.777225
Unigene3463_All	0.042644	-0.227
Unigene19766_All	-0.473932	-0.522378
Unigene26071_All	0.0285694	0.128617
Unigene17840_All	-0.251543	-0.325861
Unigene11260_All	0.411426	0.721341
Unigene26116_All	-0.268818	-0.525917
Unigene11375_All	-0.217591	0.121109
Unigene3920_All	-0.434401	-0.124758
Unigene20861_All	-0.0291489	-0.395437
Unigene6702_All	0.0285694	-0.0446009
Unigene8976_All	-0.0588983	0.0028772
Unigene22728_All	-0.234465	-0.160231
Unigene22687_All	-0.104699	-0.489443
Unigene23333_All	-0.0144981	-0.107371
Unigene23144_All	-0.200919	-0.0466878
Unigene11563_All	-0.0892676	-0.499159
Unigene6678_All	0.0143553	-0.361631
Unigene22422_All	-0.0739984	0.293737
Unigene3729_All	0.0285694	0.0967609
Unigene23388_All	0.0143553	-0.125324
Unigene4246_All	-0.304009	0.108821
Unigene21115_All	0.505892	0.0413804
Unigene7910_All	-0.217591	0.0493939
Unigene3868_All	0.189034	0.186454
Unigene4037_All	0.516015	1.72906
Unigene1522_All	0.0143553	-0.231086
Unigene3885_All	0.226508	-0.273228
Unigene18370_All	0.042644	-0.167369
Unigene13858_All	-0.0588983	-0.212918
Unigene20848_All	-0.0892676	0.0540786
Unigene11007_All	-0.200919	-0.142181
Unigene9044_All	-0.286302	-0.197995
Unigene5613_All	0.422232	-1.92559
Unigene11005_All	0.124328	0.0827784
Unigene24665_All	0.0840646	-0.0181895
Unigene9158_All	-0.358453	0.182576
Unigene8925_All	0	0.734955
Unigene658_All	0.344828	2.92702
Unigene4222_All	0.238786	0.0481326
Unigene1038_All	0.263035	-0.0923961
Unigene15363_All	-0.168129	0.287853
Unigene20551_All	-0.321928	-0.371119
Unigene22380_All	-0.0892676	-0.152111
Unigene1008_All	0.201634	-0.331222
Unigene15800_All	-0.0144981	-0.144317
Unigene3351_All	0.0976115	0.312962
Unigene18734_All	0.042644	-0.0818626
Unigene18405_All	0.226508	0.222214
Unigene3549_All	0.485426	3.3456
Unigene23382_All	-0.0588983	-0.151607
Unigene13796_All	0.0840646	-0.206422
Unigene21124_All	0.042644	-0.188447
Unigene5713_All	-0.0892676	-0.0996294
Unigene23360_All	0.042644	-0.41725
Unigene1237_All	0.189034	-0.214354
Unigene22853_All	0.15056	0.586593
Unigene13935_All	0.594548	0.649048
Unigene21087_All	0.124328	0.0579108
Unigene13870_All	-0.234465	0.0491966
Unigene20216_All	-0.494108	-0.140454
Unigene14064_All	0.0840646	-0.101371
Unigene24777_All	0	-1.15129
Unigene22652_All	0.137503	-1.13883
Unigene9031_All	-0.18442	-0.094237
Unigene4315_All	-0.13606	0.00153036
Unigene20855_All	0.111031	-0.276142
Unigene10851_All	-0.234465	0.191821
Unigene27572_All	0.214125	0.295449
Unigene10479_All	-0.358453	-0.0846685
Unigene16043_All	-0.0739984	-2.19358
Unigene5243_All	-0.434401	-0.202388
Unigene13961_All	-0.200919	-0.137437
Unigene13679_All	-0.200919	-0.157844
Unigene20688_All	-0.168129	-0.272935
Unigene6275_All	-0.200919	-0.0281044
Unigene23401_All	-0.168129	0.106843
Unigene13966_All	-0.251543	-0.18289
Unigene26914_All	0.411426	0.362892
Unigene6246_All	-0.217591	-0.0243318
Unigene6449_All	0.226508	0.344589
Unigene616_All	-0.217591	0.372116
Unigene13939_All	0.042644	-0.278859
Unigene13859_All	-0.0144981	-0.543514
Unigene15682_All	-0.0291489	0.175279
Unigene6469_All	-0.200919	0.0267977
Unigene6481_All	0.0840646	-0.699333
Unigene20964_All	0.137503	0.129877
Unigene13829_All	-0.0291489	-0.0134422
Unigene8582_All	0.0143553	0.250227
Unigene18712_All	0	-0.333508
Unigene11349_All	0.042644	-0.23528
Unigene18713_All	0.495695	0.11275
Unigene1348_All	-0.13606	0.14741
Unigene18189_All	-0.104699	-0.56174
Unigene20863_All	-0.13606	0.0670919
Unigene17995_All	-0.454028	-0.773271
Unigene10996_All	0	0.448756
Unigene23523_All	0.0840646	0.0668895
Unigene18930_All	-0.0144981	0.179824
Unigene13330_All	-0.217591	-0.112616
Unigene18525_All	0.0143553	0.0321414
Unigene19907_All	-0.120299	-0.0381632
Unigene6628_All	-0.268818	-0.01234
Unigene6591_All	-0.0144981	-0.0349155
Unigene8969_All	-0.0739984	-0.519193
Unigene6669_All	-0.0892676	0.301448
Unigene22706_All	0	-0.579534
Unigene777_All	0.443607	0.238153
Unigene786_All	0.201634	-0.171865
Unigene21038_All	0.0976115	0.129774
Unigene22705_All	-1.25154	-0.242138
Unigene20860_All	-0.234465	-0.575361
Unigene1123_All	-0.0144981	-0.096213
Unigene22856_All	0	0.351667
Unigene8095_All	-0.152002	0.290511
Unigene20934_All	-0.494108	-0.173511
Unigene1183_All	-0.217591	-0.513339
Unigene13948_All	-0.152002	0.153739
Unigene20777_All	-0.0144981	-0.323631
Unigene6627_All	-0.268818	-0.180746
Unigene6715_All	-0.0144981	-0.124418
Unigene15338_All	0.111031	-0.0915618
Unigene815_All	-0.268818	-0.213068
Unigene21777_All	-0.340072	-0.0272436
Unigene21005_All	-0.200919	-0.365669
Unigene13431_All	0.042644	-0.0262264
Unigene995_All	-0.0892676	-0.155062
Unigene6026_All	-0.0588983	0.00891079
Unigene13651_All	-0.0892676	-0.437812
Unigene11497_All	-0.454028	-0.00595351
Unigene18521_All	-0.0739984	-0.0942842
Unigene18687_All	-0.152002	-0.265711
Unigene13878_All	-0.340072	0.178073
Unigene553_All	-0.18442	0.622333
Unigene15838_All	-0.13606	0.208686
Unigene6597_All	-0.514572	-0.187577
Unigene8663_All	0.0143553	0.0169701
Unigene4173_All	-0.18442	-0.326264
Unigene10601_All	-0.120299	1.48654
Unigene11565_All	-0.0739984	-0.777686
Unigene8912_All	-0.152002	-0.0147551
Unigene20594_All	-0.321928	-0.595188
Unigene6856_All	0.298659	1.20657
Unigene13435_All	-0.152002	0.241875
Unigene16256_All	-0.535336	-0.154745
Unigene21099_All	0	-0.112152
Unigene4279_All	-0.200919	-0.00815082
Unigene8981_All	-0.217591	0.0414853
Unigene18409_All	-0.0439464	0.42315
Unigene11020_All	-0.13606	0.271837
Unigene13482_All	0.111031	-0.0761954
Unigene4055_All	-0.395929	-0.0327053
Unigene28043_All	0.263035	0.196643
Unigene12619_All	-0.377068	-0.714823
[truncated: 1,275 more rows]
