# Supplementary material for: Combined transcriptomic and proteomic analysis reveals multiple pathways involved in self-pollen tube development and the potential roles of FviYABBY1 in self-incompatibility in Fragaria viridis
Source: Front Plant Sci. 2022 Sep 14;13:927001. doi: 10.3389/fpls.2022.927001 (PMC9515988; doi:10.3389/fpls.2022.927001)
Supplement: Supplementary file 8 [file Table_8.XLSX]

## Sheet: Table S8
Table S8. Genes were detected at both transcriptomic and proteomic levels.
Gene ID	Proteome		Transcriptome		Annotation
	log2(FC)	p-value	log2(FC)	p-value
Unigene8018_All	1.44	0.0003921	3.79	9.1e-154	polyneuridine-aldehyde esterase-like
Unigene18379_All	1.4	0.000875	3.99	3.64e-143	LAT52-like
Unigene17939_All	1.06	0.0001671	2.61	8.93e-287	vignain-like
Unigene20258_All	1	0.0001449	2.7	1.62e-53	polygalacturonase-like
Unigene15946_All	2.24	2.407e-06	3.93	7.36e-32	pathogenesis-related protein 1-like
Unigene9080_All	1.3	0.00111	2.17	0	uncharacterized protein
Unigene10602_All	-1.18	2.5e-05	-3.76	2.55e-235	rapid alkalinization factor-like
Unigene18612_All	-1.03	0.0001326	-2.4	2.93e-223	cytochrome P450
Unigene8852_All	-1.09	0.002703	-1.15611	3.15e-13	uncharacterized protein
Unigene23384_All	1.08	6.005e-05	-1.18234	7.18e-126	beta-glucosidase 3
Unigene1093_All	1.27	0.001244	1.71072	3.28e-10	pathogenesis-related protein 1B-like
Unigene3597_All	1.05	0.002629	1.97555	0.00166584	peroxidase 5-like
