# Supplementary material for: Combined transcriptomic and proteomic analysis reveals multiple pathways involved in self-pollen tube development and the potential roles of FviYABBY1 in self-incompatibility in Fragaria viridis
Source: Front Plant Sci. 2022 Sep 14;13:927001. doi: 10.3389/fpls.2022.927001 (PMC9515988; doi:10.3389/fpls.2022.927001)
Supplement: Supplementary file 9 [file Table_9.XLSX]

## Sheet: Table S9
Table S9. Vital DEGs and DAPs identified by RNA-seq and iTRAQ during SP. FC: Fold change (24 HAP / 0 HAP)
Transcriptome				Proteome
Gene ID	log2 FC	p-value	Description	Protein ID	FC	p-value	Description
Polar growth of pollen tube
Unigene16298_All	-1.04	2.49e-37	axial regulator YABBY 1-like
Pollen growth
Unigene10810_All	3.26	2.98e-15	Pollen receptor-like kinase 3	Unigene10978_All	1.79	0.0001407	RALF-like protein 19
Unigene20473_All	4.14	5.35e-37	Pollen receptor-like kinase 4	Unigene6795_All	1.67	0.01492	Metacaspase-1
Unigene8236_All	4.37	1.73e-124	Pollen receptor-like kinase 2	Unigene37971_All	-2.33	0.01334	Fasciclin-like arabinogalactan protein 14
Unigene4654_All	3.2	2.28e-05	Cellulose synthase-like protein D4	Unigene16355_All	-1.72	0.001406	S-adenosylmethionine synthase 2
Unigene20275_All	4.97	1.4e-71	Fructokinase-7	Unigene6615_All	1.92	0.002335	Equilibrative nucleotide transporter 1
Unigene10991_All	4.37	1.02e-270	Fasciclin-like arabinogalactan protein 14	CL3404_Contig3_All	-1.64	0.0007029	Olee1-like protein
Unigene18443_All	4.06	4.69e-36	Fasciclin-like arabinogalactan protein 20	CL354_Contig4_All	1.96	0.01252	UDP-glycosyltransferase 73B3
CL1967.Contig2_All	3.96	9.69e-244	Fasciclin-like arabinogalactan protein 23
Unigene18379_All	4	3.64e-143	LAT 52
Unigene18907_All	-5.76	1.14e-78	GDSL esterase/lipase protein
Unigene809_All	4.02	7e-17	Actin-depolymerizing factor 7
CL6515.Contig1_All	5.12	4.15e-173	Reticuline oxidase-like protein
Unigene11800_All	3.98	1.2e-11	RALF-like protein 13
Unigene15943_All	3.79	3.58e-86	RALF-like protein 19
Unigene10602_All	-3.77	2.55e-235	RALF-like protein 19
CL7779.Contig1_All	5.4	2.02e-16	Stig1-like protein
CL5508.Contig2_All	4.4	9.82e-30	UDP-galactose/UDP-glucose transporter 2
Unigene22715_All	-4.05	6.48e-29	Glycosyltransferase 79B6
Unigene9487_All	4.16	6.01e-21	Uncharacterized
Unigene11757_All	4.36	2.13e-12	Uncharacterized
Ubiquitin mediated proteolysis
Unigene3797_All	4.06	3.52e-41	SKP1	CL5364_Contig1_All	-1.61	0.0001755	Ubiquitin-conjugating enzyme E2
Unigene8982_All	2	2.55e-27	E3 ubiquitin-protein ligase ARI2	CL4737_Contig1_All	2.08	0.00165	E3 ubiquitin-protein ligase At4g11680
Unigene11602_All	3.17	6.5e-09	Uncharacterized protein	CL7114_Contig1_All	-2.22	0.04869	E3 ubiquitin-protein ligase SHPRH
RNA degradation
Unigene1669_All	3.44	4.06e-06	NEDD8-conjugating enzyme UBC12	CL9079_Contig1_All	1.52	0.001405	Uncharacterized proteins
Unigene21120_All	1.85	9.39e-38	NAC domain-containing protein 100	CL6989_Contig3_All	1.56	0.01251	Uncharacterized proteins
CL3425_Contig1_All	1.05	3.99e-05	NAC domain-containing protein 100
Unigene9127_All	1.15922	6.45e-26	NAC domain-containing protein 100
CL3425.Contig2_All	1.7481	3.86e-16	NAC domain-containing protein 100
Unigene9375_All	3.13185	2.91e-11	CCR4-associated factor (CAF)
CL1447.Contig7_All	1.57051	0.000529862	chaperonin 60 subunit beta 4
CL1447.Contig10_All	1.234	4.59e-07	chaperonin 60 subunit beta 4
CL1447.Contig6_All	2.45676	0.00161813	chaperonin 60 subunit beta 4
Programmed cell death
CL3763.Contig2_All	4.3	1.2e-09	U-box domain-containing protein 15	Unigene177_All	-1.85	0.003274	Vacuolar-processing enzyme
CL4031.Contig3_All	-1.3	0.00295	UBP1-associated protein 2C	CL200_Contig13_All	1.52	3.19e-05	Cytochrome P450 71D11
CL3361.Contig3_All	4.27	1.73e-09	guanine nucleotide-binding protein	Unigene_17867_All	1.61	0.0004793	Cytochrome P450 71A25
Unigene18612_All	-2.41	2.93e-223	Cytochrome P450 86A7
Plant pathogen interaction
Unigene6955_All	4.67	9.2e-20	Elicitor-responsive protein 3	Unigene5562_All	1.82	0.001749	F-box protein CPR30
CL3506.Contig5_All	3.51	2.75e-06	Ferric reduction oxidase 7	Unigene1000_All	-1.69	0.0001345	MLP-like protein 28
Unigene15946_All	3.93	7.36e-32	pathogenesis-related protein 1	Unigene3597_All	-2.08	0.002629	Peroxidase 5
Unigene18350_All	3.04	1.03e-148	pathogenesis-related protein 1
Unigene15602_All	3.66	2.55e-10	GAMYB
CL8257.Contig2_All	-4.45	5.77e-35	WIN1
CL9344.Contig2_All	2,42	0.000408964	LRR receptor-like serine/threonine-protein kinase
Unigene20065_All	6.8	1.26e-29	Pollen-specific LRR/ extensin-like protein 3
Unigene14537	3.65	4.98e-09	RPM1-interacting protein 4
Unigene10826_All	3.22	7.27e-09	Serine/Threonine-protein kinase
CL562.Contig1_All	3.26	8.48e-14	Osmotin-like protein
Unigene11803_All	-4.6	8.01e-27	Thaumatin-like protein
Unigene837_All	4.02	0	Thaumatin-like protein
Unigene1093_All	-2.44	0.001244	Pathogenesis-related protein
Cell wall modification
Unigene11298_All	-3.64	0	Pectate lyase 5	Unigene23384_All	-2.13	6.005e-05	Beta-glucosidase 3
Unigene21459_All	4.77235	4.84e-33	pectinesterase/pectinesterase inhibitor	Unigene1082_All	-1.84	0.0002548	Glucan endo-1,3-beta-glucosidase
Ca+ signal
Unigene23155_All	2.94	2.91e-18	Calcium-binding protein cml42
Unigene9530_All	4.42	1.43e-22	Calumenin
Unigene4297_All	4.6	1.56e-67	CDPK 34
Unigene16516_All	3.63	1.04e-14	CDPK 24
Hormone signal
Unigene4653_All	-3.49	1.26e-16	bHLH14	Unigene34598_All	-3.23	0.003219	Sts14 protein-like
CL2101.Contig1_All	-4.14	2.6e-08	Scarecrow-like protein	CL955_Contig1_All	-1.92	0.001164	XTH protein 23
CL7976.Contig1_All	3.98	3.17e-109	ABP19A	CL1839_Contig1_All	1.64	0.002018	Squamosa pomoter-binding protein
CL1316.Contig1_All	-2.01	3.55e-08	indole-3-acetic acid (IAA)-amido synthetase
Unigene11759_All	3.04	2.61e-11	Pathogenesis-related protein
CL1726.Contig4_All	4.44	2.52e-26	Uncharacterized protein
ROS signal
Unigene6020_All	4.33	4.28e-23	MAPKKK YODA
Unigene13003	3.85	1.23e-57	MAPKKK NPK1
Unigene11193_All	-2.18	5.4472e-81	18.2 kDa class I heat shock protein
