# Supplementary material for: Combined transcriptomic and proteomic analysis reveals multiple pathways involved in self-pollen tube development and the potential roles of FviYABBY1 in self-incompatibility in Fragaria viridis
Source: Front Plant Sci. 2022 Sep 14;13:927001. doi: 10.3389/fpls.2022.927001 (PMC9515988; doi:10.3389/fpls.2022.927001)
Supplement: Supplementary file 10 [file Table_10.XLSX]

## Sheet: Sheet1
Supplementary Table S10. Physicochemical properties of YABBY family genes in F. viridis and F. vesca
Gene name	Gene ID	Number of amino acids	Theoretical pI	Molecular weight（kDa）	Signal Peptide
FviCRC	Unigene9077_All	189	9.23	20.8	N
FviINO	Unigene8984_All	237	5.39	27.06	N
FviYABBY1	Unigene16298_All	218	8.24	24.19	N
FviYABBY2	Unigene23403_All	232	9	25.28	N
FviYABBY3a	Unigene31936_All	198	9.55	22.37	N
FviYABBY3b	CL6710.Contig2_All	231	8.58	25.79	N
FviYABBY5	Unigene13986_All	175	8.19	19.67	N
FveCRC	FvH4_4g29650.1	547	8.9	60.9	N
FveINO	FvH4_4g32910.1	237	5.51	27.12	N
FveYABBY1	FvH4_7g11260.1	217	8.24	24.07	N
FveYABBY2	FvH4_3g26130.1	234	9	25.39	N
FveYABBY3	FvH4_5g00320.1	232	8.58	25.92	N
FveYABBY5	FvH4_1g03040.1	175	8.19	19.66	N
